# Supplementary material for: Novel MicroRNA Candidates and miRNA-mRNA Pairs in Embryonic Stem (ES) Cells
Source: PubMed Central journal article supplement (PMC2481296; doi:10.1371/journal.pone.0002548), 2008-07-02
Supplement: pone.0002548.s009.pdf [file pone.0002548.s009.pdf]

**Supplemental Table ST2A: Chromosome location and genome context of MCE-MIRs on Mouse Array Version 2.** This data was derived using the mm7 (Aug 2005) assembly of the Mouse Genome.

| MCE-MIR           | Genomic Context                   | RefSeq Gene | Position (mm7)                |
|-------------------|-----------------------------------|-------------|-------------------------------|
| MCE-MIR_1038: fwd | Exon anti                         | Zfp295      | chr16: 98,334,763-98,334,955  |
| MCE-MIR_1046: rev | Exon anti                         | Rbm18       | chr2: 36,134,480-36,134,556   |
| MCE-MIR_1052: rev | Intron/Exon Intersection parallel | AW547186    | chrX: 137,470,295-137,470,398 |
| MCE-MIR_1059: fwd | Exon anti                         | Hdlbp       | chr1: 93,346,047-93,346,105   |
| MCE-MIR_1066: rev | Intergenic                        |             | chr17: 78,152,776-78,152,995  |
| MCE-MIR_1074: rev | Intergenic                        |             | chr19: 6,667,093-6,667,158    |
| MCE-MIR_1190: fwd | UTR anti                          | Mark2       | chr19: 7,096,454-7,096,693    |
| MCE-MIR_1192: rev | Intron/Exon Intersection parallel | Sorbs3      | chr14: 64,835,307-64,835,727  |
| MCE-MIR_1226: fwd | Intergenic                        |             | chr11: 42,818,806-42,818,868  |
| MCE-MIR_1259: rev | Exon parallel                     | Ifrg15      | chr1: 156,013,866-156,013,991 |
| MCE-MIR_1264: rev | Intron/Exon Intersection anti     | Ctsd        | chr7: 138,807,964-138,808,090 |
| MCE-MIR_1269: rev | Intron/Exon Intersection anti     | Prdm4       | chr10: 85,451,616-85,451,691  |
| MCE-MIR_1283: fwd | Intron/Exon Intersection parallel | Wdr1        | chr5: 37,884,005-37,884,426   |
| MCE-MIR_1283: rev | Intron/Exon Intersection anti     | Wdr1        | chr5: 37,884,143-37,884,228   |
| MCE-MIR_1311: rev | Intron/Exon Intersection anti     | Lmbr11      | chr15: 98,893,753-98,894,173  |
| MCE-MIR_1325: rev | Intergenic                        |             | chr8: 103,954,328-103,954,547 |
| MCE-MIR_1342: fwd | Intron/Exon Intersection parallel | Mkln1       | chr6: 31,389,152-31,389,395   |
| MCE-MIR_135: fwd  | UTR-Intersection anti             | Ppgb        | chr2: 164,573,793-164,573,894 |
| MCE-MIR_1352: fwd | Exon anti                         | Mapk6       | chr9: 75,434,987-75,435,212   |
| MCE-MIR_1356: fwd | UTR-Intersection anti             | Xpo6        | chr7: 122,198,788-122,198,884 |
| MCE-MIR_1356: rev | UTR-Intersection parallel         | Xpo6        | chr7: 122,198,792-122,198,880 |
| MCE-MIR_136: fwd  | UTR-Intersection anti             | Ppgb        | chr2: 164,573,655-164,574,078 |
| MCE-MIR_1364: fwd | Intergenic                        |             | chr4: 61,738,294-61,738,513   |
| MCE-MIR_1365: fwd | UTR-Intersection anti             | Ogfr        | chr2: 181,096,413-181,096,632 |
| MCE-MIR_1365: rev | UTR-Intersection parallel         | Ogfr        | chr2: 181,096,313-181,096,732 |
| MCE-MIR_1371: fwd | Intron/Exon Intersection parallel | Cuedc2      | chr19: 46,227,838-46,228,057  |
| MCE-MIR_1401: fwd | Exon anti                         | Prdx1       | chr4: 116,068,276-116,068,368 |
| MCE-MIR_1412: fwd | Intergenic                        |             | chr9: 53,077,781-53,077,904   |
| MCE-MIR_1433: fwd | Intron/Exon Intersection parallel | Akr7a5      | chr4: 138,692,945-138,693,013 |
| MCE-MIR_1433: rev | Intron/Exon Intersection anti     | Akr7a5      | chr4: 138,692,945-138,693,013 |
| MCE-MIR_1442: fwd | Intron/Exon Intersection anti     | Nr1i2       | chr16: 37,957,907-37,958,000  |
| MCE-MIR_1458: rev | Intron/Exon Intersection parallel | Nudt16l1    | chr16: 4,612,813-4,612,942    |
| MCE-MIR_1482: rev | Exon anti                         | Ddb2        | chr2: 91,069,535-91,069,595   |
| MCE-MIR_1495: fwd | Intron/Exon Intersection anti     | Arnt        | chr3: 95,358,811-95,359,031   |
| MCE-MIR_1504: rev | Intergenic                        |             | chr7: 122,967,139-122,967,359 |

| <b>MCE-MIR</b>   | <b>Genomic Context</b>            | <b>RefSeq Gene</b> | <b>Position (mm7)</b>          |
|------------------|-----------------------------------|--------------------|--------------------------------|
| MCE-MIR_1506:rev | Intergenic                        |                    | chr11: 4,433,375-4,433,430     |
| MCE-MIR_1508:fwd | Intron parallel                   | Il6ra              | chr3: 89,373,164-89,373,389    |
| MCE-MIR_151:fwd  | Intergenic                        |                    | chr3: 88,474,104-88,474,164    |
| MCE-MIR_1514:fwd | Intron/Exon Intersection parallel | Osbp12             | chr2: 180,659,850-180,660,069  |
| MCE-MIR_1535:rev | Exon anti                         | Bc3324             | chr5: 123,723,799-123,723,905  |
| MCE-MIR_1536:rev | Intron/Exon Intersection parallel | Zfp513             | chr5: 30,232,475-30,232,729    |
| MCE-MIR_1538:fwd | UTR parallel                      | 95358B2Rik         | chr17: 24,046,866-24,047,090   |
| MCE-MIR_1539:rev | Intron/Exon Intersection parallel | Fkbp2              | chr19: 6,798,328-6,798,550     |
| MCE-MIR_1544:rev | Intergenic                        |                    | chr1: 105,930,148-105,930,370  |
| MCE-MIR_1546:rev | Intron/Exon Intersection anti     | 573593F17Rik       | chr11: 95,484,513-95,484,933   |
| MCE-MIR_1569:rev | Intron/Exon Intersection anti     | H2afy              | chr13: 55,185,424-55,185,644   |
| MCE-MIR_1576:rev | Intron parallel                   | St6galnac2         | chr11: 116,558,576-116,558,795 |
| MCE-MIR_1597:fwd | UTR-Intersection anti             | Atp6vd1            | chr8: 104,164,432-104,164,664  |
| MCE-MIR_1611:fwd | Intron/Exon Intersection parallel | Lrrc47             | chr4: 153,007,861-153,008,081  |
| MCE-MIR_162:fwd  | Intron/Exon Intersection parallel | Ndrp4              | chr8: 94,297,419-94,297,838    |
| MCE-MIR_1642:rev | Intron/Exon Intersection anti     | Cd82               | chr2: 93,272,530-93,272,614    |
| MCE-MIR_1670:fwd | Intron/Exon Intersection anti     | H2afy              | chr13: 55,185,434-55,185,656   |
| MCE-MIR_1679:fwd | Intergenic                        |                    | chr3: 150,482,410-150,482,489  |
| MCE-MIR_1689:rev | Intron anti                       | 1719N19Rik         | chr19: 58,712,476-58,712,584   |
| MCE-MIR_1710:rev | Exon parallel                     | Ap2a1              | chr7: 41,080,263-41,080,343    |
| MCE-MIR_1734:fwd | Intergenic                        |                    | chr9: 110,342,130-110,342,349  |
| MCE-MIR_1742:rev | Intron/Exon Intersection anti     | Copa               | chr1: 172,089,529-172,089,750  |
| MCE-MIR_1746:rev | Intron/Exon Intersection parallel | Ankrd15            | chr19: 25,130,807-25,131,029   |
| MCE-MIR_1756:rev | Exon parallel                     | Trim8              | chr19: 46,399,416-46,399,635   |
| MCE-MIR_1773:fwd | UTR-Intersection anti             | Fbxw5              | chr2: 25,509,187-25,509,407    |
| MCE-MIR_1773:rev | UTR-Intersection parallel         | Fbxw5              | chr2: 25,509,187-25,509,407    |
| MCE-MIR_1778:fwd | Exon anti                         | Centb1             | chr11: 69,965,930-69,965,988   |
| MCE-MIR_1784:fwd | Intergenic                        |                    | chr16: 18,634,741-18,634,960   |
| MCE-MIR_1786:fwd | Intron/Exon Intersection anti     | Map3k7ip1          | chr15: 80,242,074-80,242,139   |
| MCE-MIR_1788:fwd | UTR anti                          | Hif1an             | chr19: 44,467,961-44,468,180   |
| MCE-MIR_1788:rev | UTR parallel                      | Hif1an             | chr19: 44,467,961-44,468,180   |
| MCE-MIR_1793:fwd | UTR-Intersection parallel         | Crb3               | chr17: 55,276,155-55,276,576   |
| MCE-MIR_1811:rev | Intron parallel                   | Il6ra              | chr3: 89,595,074-89,595,297    |
| MCE-MIR_1829:rev | Intron/Exon Intersection parallel | Rutbc3             | chr15: 81,093,215-81,093,434   |
| MCE-MIR_1857:fwd | UTR parallel                      | Sec24c             | chr14: 18,350,605-18,351,025   |
| MCE-MIR_1929:fwd | Intron/Exon Intersection anti     | Eprs               | chr1: 184,910,578-184,910,706  |
| MCE-MIR_1973:fwd | Intron/Exon Intersection anti     | 633569M22Rik       | chr3: 107,439,578-107,439,797  |
| MCE-MIR_1974:fwd | Intron/Exon Intersection parallel | AI31418            | chr4: 58,913,963-58,914,182    |
| MCE-MIR_1986:fwd | Intron/Exon Intersection parallel | Pex6               | chr17: 44,853,004-44,853,227   |

| MCE-MIR          | Genomic Context                   | RefSeq Gene | Position (mm7)                 |
|------------------|-----------------------------------|-------------|--------------------------------|
| MCE-MIR_2078:fwd | Intergenic                        |             | chr5: 86,754,165-86,754,185    |
| MCE-MIR_2087:rev | Intergenic                        |             | chr1: 10,280,227-10,280,364    |
| MCE-MIR_2134:fwd | Intron/Exon Intersection anti     | Stno        | chr10: 79,849,036-79,849,252   |
| MCE-MIR_2139:fwd | Intron/Exon Intersection parallel | Epha2       | chr4: 140,700,279-140,700,383  |
| MCE-MIR_2164:rev | Intron/Exon Intersection parallel | Fgd5        | chr6: 92,131,378-92,131,598    |
| MCE-MIR_2166:fwd | Intron/Exon Intersection anti     | Nfatc4      | chr14: 50,695,802-50,696,221   |
| MCE-MIR_2166:rev | Intron/Exon Intersection parallel | Nfatc4      | chr14: 50,695,802-50,696,221   |
| MCE-MIR_2169:rev | Intron/Exon Intersection anti     | Cry1        | chr10: 84,725,605-84,725,830   |
| MCE-MIR_2171:rev | Intron/Exon Intersection parallel | Prg2        | chr2: 84,826,293-84,826,526    |
| MCE-MIR_2173:rev | NO MATCH                          |             | no match                       |
| MCE-MIR_2192:rev | Intron anti                       | Itsn2       | chr12: 4,621,887-4,621,962     |
| MCE-MIR_2196:fwd | Exon anti                         | Bruno14     | chr18: 25,880,884-25,880,952   |
| MCE-MIR_2205:fwd | Intron/Exon Intersection anti     | Tulp2       | chr7: 41,697,701-41,697,762    |
| MCE-MIR_2222:fwd | Exon anti                         | Tgif        | chr17: 69,124,699-69,124,786   |
| MCE-MIR_2243:fwd | Intron/Exon Intersection anti     | Gramd1a     | chr7: 28,076,090-28,076,310    |
| MCE-MIR_2285:fwd | Intron/Exon Intersection parallel | Calu        | chr6: 29,304,667-29,304,887    |
| MCE-MIR_2304:rev | Intron/Exon Intersection parallel | Guk1        | chr11: 59,266,739-59,266,958   |
| MCE-MIR_2310:rev | Exon anti                         | Gfra1       | chr19: 58,216,430-58,216,513   |
| MCE-MIR_2327:fwd | Intron/Exon Intersection parallel | Smarca2     | chr19: 26,420,719-26,420,782   |
| MCE-MIR_2337:fwd | Intron/Exon Intersection parallel | Gyk         | chrX: 81,098,975-81,099,194    |
| MCE-MIR_2345:fwd | Intergenic                        |             | chr7: 78,790,436-78,790,661    |
| MCE-MIR_2349:rev | Intron/Exon Intersection anti     | A9331D7Rik  | chr1: 131,936,032-131,936,251  |
| MCE-MIR_2361:fwd | Intron/Exon Intersection anti     | Pknx2       | chr9: 36,883,254-36,883,480    |
| MCE-MIR_2371:fwd | Intron/Exon Intersection parallel | Ddx41       | chr13: 54,620,795-54,621,214   |
| MCE-MIR_2371:rev | Exon anti                         | Ddx41       | chr13: 54,620,925-54,621,060   |
| MCE-MIR_2388:rev | Intron/Exon Intersection anti     | Prkd2       | chr7: 14,629,518-14,629,750    |
| MCE-MIR_2417:fwd | Intron/Exon Intersection parallel | Ezh2        | chr6: 47,581,110-47,581,260    |
| MCE-MIR_2419:fwd | Intron parallel                   | Spint1      | chr2: 119,707,073-119,707,174  |
| MCE-MIR_2464:fwd | Intron/Exon Intersection parallel | Nat1        | chr2: 103,576,401-103,576,622  |
| MCE-MIR_2470:fwd | Intron parallel                   | Rbm5        | chr9: 107,488,672-107,488,907  |
| MCE-MIR_2474:rev | Intron/Exon Intersection anti     | Nckap11     | chr15: 103,475,443-103,475,864 |
| MCE-MIR_2522:rev | UTR anti                          | Unc84a      | chr5: 138,221,693-138,222,112  |
| MCE-MIR_2524:fwd | Intergenic                        |             | chr19: 44,876,679-44,876,913   |
| MCE-MIR_254:fwd  | Exon anti                         | Dus31       | chr17: 54,979,964-54,980,023   |
| MCE-MIR_2563:fwd | NO MATCH                          |             | no match                       |
| MCE-MIR_2563:rev | Exon anti                         | A931N9Rik   | chr17: 24,944,784-24,944,861   |
| MCE-MIR_2566:fwd | Intron parallel                   | Igsf4a      | chr9: 47,492,541-47,492,562    |
| MCE-MIR_2566:rev | Intron anti                       | Igsf4a      | chr9: 47,492,541-47,492,562    |
| MCE-MIR_2617:fwd | Exon parallel                     | Zbtb38      | chr9: 96,329,470-96,329,689    |

| MCE-MIR          | Genomic Context                   | RefSeq Gene | Position (mm7)                      |
|------------------|-----------------------------------|-------------|-------------------------------------|
| MCE-MIR_2624:rev | Intergenic                        |             | chr5: 72,697,247-72,697,267         |
| MCE-MIR_2661:rev | Exon anti                         | Egr1        | chr18: 35,239,402-35,239,479        |
| MCE-MIR_2679:fwd | Exon anti                         | Coro1a      | chr7: 122,798,585-122,798,641       |
| MCE-MIR_2680:fwd | UTR-Intersection anti             | C85492      | chr9: 121,691,409-121,691,628       |
| MCE-MIR_2680:rev | UTR-Intersection parallel         | C85492      | chr9: 121,691,409-121,691,628       |
| MCE-MIR_2698:rev | Intergenic                        |             | chr9: 110,011,343-110,011,565       |
| MCE-MIR_2714:rev | Intron/Exon Intersection parallel | Rfx1        | chr8: 82,675,926-82,676,149         |
| MCE-MIR_273:fwd  | Intron/Exon Intersection parallel | Fchsd2      | chr7: 97,323,651-97,323,882         |
| MCE-MIR_2798:fwd | UTR anti                          | Strn3       | chr12: 49,622,497-49,622,882        |
| MCE-MIR_281:rev  | Intron anti                       | Lilrb4      | chr10: 51,310,982-51,311,068        |
| MCE-MIR_2815:fwd | Intergenic                        |             | chr3: 94,299,755-94,299,974         |
| MCE-MIR_2817:fwd | Intron/Exon Intersection anti     | Cyfp2       | chr11: 46,177,989-46,178,215        |
| MCE-MIR_2866:rev | Exon anti                         | Hoxa2       | chr6: 52,126,444-52,126,597         |
| MCE-MIR_2894:fwd | UTR parallel                      | Itm2c       | chr1: 85,809,251-85,809,319         |
| MCE-MIR_2902:fwd | Intron/Exon Intersection parallel | Map4k4      | chr1: 40,245,127-40,245,538         |
| MCE-MIR_2902:rev | Intron/Exon Intersection anti     | Map4k4      | chr1: 40,245,218-40,245,438         |
| MCE-MIR_291:rev  | Intron/Exon Intersection anti     | Idh2        | chr7: 75,963,393-75,963,525         |
| MCE-MIR_293:fwd  | Exon parallel                     | Lzts2       | chr19: 44,920,130-44,920,349        |
| MCE-MIR_293:rev  | Exon anti                         | Lzts2       | chr19: 44,920,193-44,920,260        |
| MCE-MIR_2968:fwd | Intron/Exon Intersection parallel | Eif3s8      | chr7: 122,652,931-122,653,153       |
| MCE-MIR_2977:rev | UTR parallel                      | Dab2ip      | chr2: 35,737,118-35,737,137         |
| MCE-MIR_298:rev  | Intergenic                        |             | chr10: 97,042,003-97,042,234        |
| MCE-MIR_2983:rev | UTR anti                          | Fbxo32      | chr15: 58,246,194-58,246,276        |
| MCE-MIR_2986:fwd | Intron/Exon Intersection anti     | Brd4        | chr17: 30,414,198-30,414,271        |
| MCE-MIR_2999:fwd | UTR anti                          | Itpk1       | chr12: 100,063,851-100,064,070      |
| MCE-MIR_3007:rev | Intergenic                        |             | chr3: 123,346,630-123,346,706       |
| MCE-MIR_3032:fwd | Intergenic                        |             | chr11: 87,826,761-87,826,845        |
| MCE-MIR_3057:rev | Intergenic                        |             | chr1: 95,348,851-95,348,905         |
| MCE-MIR_3059:rev | Exon anti                         | Cldn7       | chr11: 70,047,559-70,047,611        |
| MCE-MIR_3084:fwd | Intergenic                        |             | chrUn_random: 10,190,390-10,190,421 |
| MCE-MIR_3113:fwd | Intron/Exon Intersection anti     | Nup188      | chr2: 30,329,176-30,329,321         |
| MCE-MIR_3134:rev | Intron parallel                   | Slc44a2     | chr9: 21,228,843-21,228,995         |
| MCE-MIR_3147:fwd | Exon anti                         | Lmo2        | chr2: 103,826,810-103,826,873       |
| MCE-MIR_3155:fwd | Intergenic                        |             | chr11: 109,120,615-109,120,808      |
| MCE-MIR_3190:rev | UTR-Intersection anti             | Bc17c       | chr7: 123,801,406-123,801,828       |
| MCE-MIR_3191:rev | UTR-Intersection anti             | Bc17c       | chr7: 123,801,503-123,801,728       |
| MCE-MIR_321:rev  | UTR-Intersection anti             | Fkbp8       | chr8: 68,990,033-68,990,255         |
| MCE-MIR_3226:fwd | Exon parallel                     | Tfg         | chr16: 56,547,730-56,547,951        |
| MCE-MIR_3260:rev | Exon parallel                     | Atp6vb      | chr4: 117,261,627-117,261,687       |

| <b>MCE-MIR</b>   | <b>Genomic Context</b>            | <b>RefSeq Gene</b> | <b>Position (mm7)</b>          |
|------------------|-----------------------------------|--------------------|--------------------------------|
| MCE-MIR_329:fwd  | Intron/Exon Intersection anti     | Gmppb              | chr9: 107,781,753-107,781,981  |
| MCE-MIR_3295:rev | NO MATCH                          |                    | no match                       |
| MCE-MIR_3330:fwd | Intergenic                        |                    | chrX: 43,498,538-43,498,957    |
| MCE-MIR_3333:rev | Intron/Exon Intersection anti     | Abcf3              | chr16: 20,099,254-20,099,303   |
| MCE-MIR_3334:fwd | UTR parallel                      | Nfic               | chr10: 81,191,786-81,192,005   |
| MCE-MIR_334:rev  | Intron parallel                   | Rpl32              | chr6: 115,833,655-115,833,714  |
| MCE-MIR_335:fwd  | Exon anti                         | Gpx4               | chr10: 45,687,261-45,687,480   |
| MCE-MIR_3379:fwd | Exon anti                         | Scrn1              | chr6: 54,497,823-54,497,902    |
| MCE-MIR_3407:rev | Intron/Exon Intersection parallel | Tubgcp2            | chr7: 136,420,698-136,420,920  |
| MCE-MIR_3416:rev | Intergenic                        |                    | chr19: 5,962,674-5,962,721     |
| MCE-MIR_3429:fwd | UTR-Intersection parallel         | Obfc2b             | chr10: 127,903,112-127,903,534 |
| MCE-MIR_3429:rev | UTR-Intersection anti             | Obfc2b             | chr10: 127,903,212-127,903,434 |
| MCE-MIR_3441:fwd | UTR anti                          | Ralbp1             | chr17: 64,066,842-64,066,928   |
| MCE-MIR_3470:rev | Intron/Exon Intersection parallel | 1318I5Rik          | chr17: 27,894,532-27,894,588   |
| MCE-MIR_3471:rev | Intron/Exon Intersection parallel | Ankrd13a           | chr5: 114,012,065-114,012,265  |
| MCE-MIR_3474:rev | Exon anti                         | AI428795           | chr5: 110,451,758-110,451,978  |
| MCE-MIR_3477:rev | Intergenic                        |                    | chrX: 69,611,639-69,611,877    |
| MCE-MIR_3478:rev | Intergenic                        |                    | chr14: 88,233,477-88,233,505   |
| MCE-MIR_3484:rev | Intron/Exon Intersection parallel | Tuba4              | chr1: 75,439,274-75,439,493    |
| MCE-MIR_3485:rev | Intron/Exon Intersection anti     | Map2k2             | chr10: 80,911,579-80,911,798   |
| MCE-MIR_3488:rev | Intron/Exon Intersection parallel | Fxr1h              | chr3: 33,866,852-33,867,074    |
| MCE-MIR_3490:rev | Intergenic                        |                    | chr18: 55,276,939-55,277,007   |
| MCE-MIR_3491:rev | Intron/Exon Intersection anti     | Gipc1              | chr8: 82,240,691-82,240,910    |
| MCE-MIR_3492:fwd | UTR-Intersection anti             | Ddah2              | chr17: 33,157,188-33,157,407   |
| MCE-MIR_3502:rev | Intron anti                       | Eppk1              | chr15: 76,253,550-76,253,770   |
| MCE-MIR_3503:rev | UTR-Intersection anti             | Gamt               | chr10: 80,040,506-80,040,728   |
| MCE-MIR_3513:rev | Intergenic                        |                    | chr17: 38,066,118-38,066,342   |
| MCE-MIR_3522:rev | Exon parallel                     | Araf               | chrX: 19,290,802-19,290,893    |
| MCE-MIR_3529:rev | UTR anti                          | Gpc1               | chr1: 92,766,642-92,766,688    |
| MCE-MIR_3531:rev | Intron/Exon Intersection anti     | Psmc8              | chr7: 26,118,081-26,118,306    |
| MCE-MIR_3541:rev | Exon parallel                     | Wnt5a              | chr14: 25,952,235-25,952,454   |
| MCE-MIR_3543:rev | Intron anti                       | Nnp1               | chr10: 78,057,115-78,057,190   |
| MCE-MIR_3550:fwd | Intron/Exon Intersection anti     | Ankrd23            | chr1: 36,773,703-36,773,784    |
| MCE-MIR_3557:rev | Intron/Exon Intersection anti     | Ubqln4             | chr3: 88,676,821-88,677,051    |
| MCE-MIR_3572:rev | UTR-Intersection anti             | 2318M1Rik          | chr3: 130,545,674-130,545,899  |
| MCE-MIR_3573:rev | Intron/Exon Intersection parallel | Clta               | chr4: 44,026,653-44,026,878    |
| MCE-MIR_3613:rev | Intron/Exon Intersection parallel | Plod3              | chr5: 135,964,115-135,964,210  |
| MCE-MIR_3619:rev | Exon anti                         | Anp32a             | chr9: 62,398,458-62,398,580    |
| MCE-MIR_3626:rev | Intron/Exon Intersection parallel | Eif2b2             | chr12: 83,219,575-83,219,797   |

| <b>MCE-MIR</b>   | <b>Genomic Context</b>            | <b>RefSeq Gene</b> | <b>Position (mm7)</b>             |
|------------------|-----------------------------------|--------------------|-----------------------------------|
| MCE-MIR_3637:rev | Intergenic                        |                    | chr3: 93,537,960-93,538,010       |
| MCE-MIR_364:fwd  | Intergenic                        |                    | chr2: 143,697,629-143,697,781     |
| MCE-MIR_3642:rev | UTR-Intersection parallel         | Abhd14a            | chr9: 106,169,474-106,169,693     |
| MCE-MIR_3646:rev | Intergenic                        |                    | chr1: 118,369,374-118,369,593     |
| MCE-MIR_3651:fwd | NO MATCH                          |                    | no match                          |
| MCE-MIR_3653:rev | UTR-Intersection anti             | Ehhadh             | chr16: 21,411,517-21,411,736      |
| MCE-MIR_3663:fwd | Intron/Exon Intersection anti     | AL33326            | chr2: 152,063,928-152,064,169     |
| MCE-MIR_3667:fwd | Intron/Exon Intersection anti     | AI4516             | chr15: 89,435,149-89,435,370      |
| MCE-MIR_3667:rev | Intron/Exon Intersection parallel | AI4516             | chr15: 89,435,233-89,435,314      |
| MCE-MIR_3684:rev | Intron anti                       | BC12278            | chrUn_random: 1,269,207-1,269,321 |
| MCE-MIR_3685:fwd | Intron/Exon Intersection anti     | Tomm4l             | chr1: 171,190,335-171,190,560     |
| MCE-MIR_3685:rev | Intron/Exon Intersection parallel | Tomm4l             | chr1: 171,190,335-171,190,560     |
| MCE-MIR_3686:fwd | Exon parallel                     | Slc25a4            | chr8: 44,987,060-44,987,160       |
| MCE-MIR_3715:rev | NO MATCH                          |                    | no match                          |
| MCE-MIR_3751:fwd | UTR-Intersection anti             | Mea1               | chr17: 44,811,345-44,811,574      |
| MCE-MIR_3762:rev | Intergenic                        |                    | chr7: 39,237,162-39,237,184       |
| MCE-MIR_3780:rev | Exon parallel                     | BC3324             | chr5: 123,723,724-123,723,764     |
| MCE-MIR_3782:rev | Intron parallel                   | Pla2g4e            | chr2: 119,979,673-119,979,736     |
| MCE-MIR_3791:rev | Intron/Exon Intersection anti     | Gnb2l1             | chr11: 48,758,468-48,758,688      |
| MCE-MIR_3793:rev | UTR-Intersection anti             | Cltb               | chr13: 53,678,056-53,678,287      |
| MCE-MIR_3797:fwd | UTR-Intersection parallel         | Ccnl1              | chr3: 66,047,602-66,047,821       |
| MCE-MIR_3832:rev | Intergenic                        |                    | chr7: 78,790,538-78,790,589       |
| MCE-MIR_3837:rev | UTR-Intersection anti             | Cnih               | chr14: 42,108,245-42,108,464      |
| MCE-MIR_3841:fwd | Exon parallel                     | Gripap1            | chrX: 6,251,208-6,251,266         |
| MCE-MIR_3859:fwd | Intergenic                        |                    | chr17: 38,064,906-38,065,126      |
| MCE-MIR_3958:fwd | Exon parallel                     | Rpp25              | chr9: 57,532,052-57,532,272       |
| MCE-MIR_4010:rev | Exon parallel                     | Fyn                | chr10: 39,343,575-39,343,640      |
| MCE-MIR_4015:fwd | UTR-Intersection parallel         | Nfrkb              | chr9: 31,322,364-31,322,584       |
| MCE-MIR_4022:fwd | Intron/Exon Intersection anti     | Smtn               | chr11: 3,484,393-3,484,612        |
| MCE-MIR_4027:rev | Intergenic                        |                    | chrX: 69,610,130-69,610,352       |
| MCE-MIR_4030:rev | UTR-Intersection anti             | C3311M18Rik        | chr8: 82,648,560-82,648,780       |
| MCE-MIR_4034:rev | Intron/Exon Intersection parallel | Aplp2              | chr9: 31,057,219-31,057,438       |
| MCE-MIR_405:rev  | Intergenic                        |                    | chr18: 35,193,427-35,193,846      |
| MCE-MIR_4060:rev | UTR anti                          | Kpnb1              | chr11: 97,270,707-97,270,826      |
| MCE-MIR_4063:fwd | Intron/Exon Intersection parallel | C4a                | chr17: 32,816,535-32,816,654      |
| MCE-MIR_4069:rev | Intron/Exon Intersection anti     | Arpc4              | chr6: 113,541,608-113,541,827     |
| MCE-MIR_407:fwd  | Intergenic                        |                    | chr2: 118,489,241-118,489,660     |
| MCE-MIR_4087:fwd | Intron/Exon Intersection parallel | Sh3bp1             | chr15: 78,988,626-78,988,851      |
| MCE-MIR_4087:rev | Intron/Exon Intersection anti     | Sh3bp1             | chr15: 78,988,626-78,988,851      |

| <b>MCE-MIR</b>   | <b>Genomic Context</b>            | <b>RefSeq Gene</b> | <b>Position (mm7)</b>          |
|------------------|-----------------------------------|--------------------|--------------------------------|
| MCE-MIR_4153:fwd | Intron/Exon Intersection anti     | Usp2               | chr2: 31,018,670-31,018,889    |
| MCE-MIR_4179:fwd | UTR parallel                      | Srf                | chr17: 44,676,200-44,676,357   |
| MCE-MIR_4179:rev | UTR anti                          | Srf                | chr17: 44,676,146-44,676,366   |
| MCE-MIR_4198:fwd | UTR parallel                      | 241166I5Rik        | chr4: 133,904,205-133,904,424  |
| MCE-MIR_4207:fwd | Exon anti                         | Trim8              | chr19: 46,411,285-46,411,349   |
| MCE-MIR_4209:fwd | Intron/Exon Intersection parallel | Inpp5b             | chr4: 124,242,972-124,243,042  |
| MCE-MIR_4226:fwd | Intron anti                       | Csnk1e             | chr15: 79,506,910-79,506,977   |
| MCE-MIR_4232:fwd | Exon anti                         | Gnas               | chr2: 174,090,686-174,090,757  |
| MCE-MIR_4236:rev | Intron/Exon Intersection parallel | Egfl7              | chr2: 26,598,188-26,598,286    |
| MCE-MIR_4239:rev | Intergenic                        |                    | chr17: 26,502,036-26,502,222   |
| MCE-MIR_4273:fwd | Intergenic                        |                    | chr6: 52,169,325-52,169,400    |
| MCE-MIR_4274:fwd | Intron parallel                   | Il6ra              | chr3: 89,305,432-89,305,558    |
| MCE-MIR_4280:fwd | Intron/Exon Intersection anti     | Scamp4             | chr10: 80,397,970-80,398,389   |
| MCE-MIR_4280:rev | Exon parallel                     | Scamp4             | chr10: 80,398,148-80,398,252   |
| MCE-MIR_4303:fwd | Exon anti                         | Tubb2c             | chr2: 25,229,739-25,229,817    |
| MCE-MIR_4320:rev | UTR anti                          | 28127O19Rik        | chr2: 109,868,756-109,868,977  |
| MCE-MIR_4342:fwd | Intergenic                        |                    | chr2: 92,411,975-92,412,358    |
| MCE-MIR_4345:rev | UTR-Intersection parallel         | D1ErtD641e         | chr10: 59,514,638-59,514,860   |
| MCE-MIR_4353:rev | Intron/Exon Intersection parallel | Rorc               | chr3: 94,263,326-94,263,745    |
| MCE-MIR_4383:rev | UTR-Intersection anti             | 543432M24Rik       | chr2: 151,711,010-151,711,429  |
| MCE-MIR_4413:fwd | Intron anti                       | Lnk                | chr5: 121,063,661-121,063,756  |
| MCE-MIR_4442:fwd | Intron/Exon Intersection anti     | 4932417H2Rik       | chr11: 120,005,560-120,005,667 |
| MCE-MIR_4449:rev | Exon anti                         | Itm2a              | chrX: 102,725,482-102,725,552  |
| MCE-MIR_4462:fwd | UTR anti                          | Crsp2              | chrX: 11,113,529-11,113,562    |
| MCE-MIR_4474:fwd | Exon parallel                     | Eif4b              | chr15: 102,079,151-102,079,231 |
| MCE-MIR_4491:fwd | UTR parallel                      | Cd24a              | chr10: 43,397,293-43,397,409   |
| MCE-MIR_4491:rev | UTR anti                          | Cd24a              | chr10: 43,397,291-43,397,519   |
| MCE-MIR_4493:fwd | Intron/Exon Intersection parallel | Gnb2l1             | chr11: 48,758,335-48,758,555   |
| MCE-MIR_4497:rev | Intron/Exon Intersection anti     | Edem1              | chr6: 108,942,742-108,942,868  |
| MCE-MIR_451:rev  | Exon parallel                     | Gstk1              | chr6: 42,189,043-42,189,071    |
| MCE-MIR_4521:fwd | UTR anti                          | Srf                | chr17: 44,680,420-44,680,526   |
| MCE-MIR_4521:rev | Intron/Exon Intersection parallel | Srf                | chr17: 44,680,304-44,680,671   |
| MCE-MIR_4554:rev | NO MATCH                          |                    | no match                       |
| MCE-MIR_4592:fwd | Intron/Exon Intersection parallel | Ndufab1            | chr7: 118,017,891-118,018,006  |
| MCE-MIR_4607:fwd | Exon anti                         | Usp28              | chr9: 49,013,542-49,013,616    |
| MCE-MIR_4610:fwd | Intron/Exon Intersection parallel | Gpbp111            | chr4: 115,950,717-115,950,939  |
| MCE-MIR_4614:rev | Exon parallel                     | Actr3b             | chr5: 24,870,929-24,870,983    |
| MCE-MIR_4627:fwd | Exon parallel                     | BC17647            | chr11: 78,236,545-78,236,768   |
| MCE-MIR_466:fwd  | Exon anti                         | Sin3b              | chr8: 71,246,642-71,246,701    |

| <b>MCE-MIR</b>   | <b>Genomic Context</b>            | <b>RefSeq Gene</b> | <b>Position (mm7)</b>          |
|------------------|-----------------------------------|--------------------|--------------------------------|
| MCE-MIR_4661:fwd | Intron/Exon Intersection parallel | Cecr5              | chr6: 120,535,852-120,536,078  |
| MCE-MIR_4661:rev | Intron/Exon Intersection anti     | Cecr5              | chr6: 120,535,852-120,536,078  |
| MCE-MIR_4667:fwd | Intergenic                        |                    | chr14: 115,984,936-115,985,007 |
| MCE-MIR_4674:fwd | UTR-Intersection parallel         | Fus                | chr7: 124,078,253-124,078,481  |
| MCE-MIR_4675:fwd | Intergenic                        |                    | chr5: 28,943,707-28,943,726    |
| MCE-MIR_4684:fwd | Intron/Exon Intersection anti     | Xpo6               | chr7: 122,201,405-122,201,624  |
| MCE-MIR_469:fwd  | Intron/Exon Intersection parallel | BC61259            | chr7: 123,866,624-123,866,846  |
| MCE-MIR_4712:fwd | Intron/Exon Intersection parallel | Tbc1d1b            | chr7: 123,295,570-123,295,789  |
| MCE-MIR_4712:rev | Exon anti                         | Tbc1d1b            | chr7: 123,295,631-123,295,677  |
| MCE-MIR_4716:fwd | Intron/Exon Intersection anti     | Aff1               | chr5: 103,038,578-103,038,803  |
| MCE-MIR_4726:fwd | Intergenic                        |                    | chr8: 28,038,023-28,038,125    |
| MCE-MIR_4726:rev | NO MATCH                          |                    | no match                       |
| MCE-MIR_4738:fwd | Intergenic                        |                    | chr11: 6,550,193-6,550,412     |
| MCE-MIR_4743:fwd | Intergenic                        |                    | chr15: 27,844,065-27,844,147   |
| MCE-MIR_4745:fwd | Intron/Exon Intersection anti     | Chmp2a             | chr7: 11,618,686-11,619,106    |
| MCE-MIR_4748:rev | Exon anti                         | Akap8              | chr17: 30,500,215-30,500,312   |
| MCE-MIR_4752:rev | UTR-Intersection parallel         | 26134G8Rik         | chr2: 157,815,822-157,816,041  |
| MCE-MIR_4755:fwd | UTR parallel                      | Ihpk1              | chr9: 107,778,181-107,778,253  |
| MCE-MIR_4756:rev | Intron/Exon Intersection anti     | Ctnnb1             | chr9: 120,649,681-120,649,903  |
| MCE-MIR_4762:fwd | Exon parallel                     | Acta1              | chr8: 122,480,510-122,480,611  |
| MCE-MIR_4789:rev | Intron/Exon Intersection anti     | Zfp46              | chr15: 68,193,550-68,193,646   |
| MCE-MIR_4791:fwd | Intergenic                        |                    | chr7: 137,870,563-137,870,782  |
| MCE-MIR_4791:rev | Intergenic                        |                    | chr7: 137,870,563-137,870,782  |
| MCE-MIR_4799:rev | Intron parallel                   | Dnm3               | chr1: 162,184,411-162,184,856  |
| MCE-MIR_4821:rev | Intron/Exon Intersection anti     | Mkln1              | chr6: 31,426,890-31,427,109    |
| MCE-MIR_4822:rev | Intergenic                        |                    | chr8: 3,716,808-3,717,001      |
| MCE-MIR_4832:rev | UTR anti                          | Fmr1               | chrX: 64,111,844-64,112,274    |
| MCE-MIR_4853:fwd | Exon anti                         | Cnot8              | chr11: 58,199,001-58,199,119   |
| MCE-MIR_4854:rev | Exon parallel                     | Ccdc14             | chr11: 29,199,038-29,199,116   |
| MCE-MIR_4861:fwd | Intron/Exon Intersection parallel | Stno               | chr10: 79,849,545-79,849,764   |
| MCE-MIR_4893:fwd | Intron/Exon Intersection anti     | Adam11             | chr11: 102,881,474-102,881,896 |
| MCE-MIR_4893:rev | Intron/Exon Intersection parallel | Adam11             | chr11: 102,881,474-102,881,896 |
| MCE-MIR_4913:rev | UTR-Intersection parallel         | Dedd2              | chr7: 22,007,843-22,008,066    |
| MCE-MIR_4922:fwd | UTR-Intersection parallel         | Ywhae              | chr11: 75,814,475-75,814,700   |
| MCE-MIR_4922:rev | UTR-Intersection anti             | Ywhae              | chr11: 75,814,475-75,814,700   |
| MCE-MIR_4932:rev | Intergenic                        |                    | chr10: 116,937,662-116,937,761 |
| MCE-MIR_4945:fwd | Intron/Exon Intersection anti     | Hps1               | chr19: 42,656,204-42,656,428   |
| MCE-MIR_4972:fwd | UTR parallel                      | Fos                | chr12: 83,477,990-83,478,078   |
| MCE-MIR_4999:rev | Intron/Exon Intersection anti     | Mapk9              | chr11: 49,837,875-49,838,108   |



| <b>MCE-MIR</b>    | <b>Genomic Context</b>            | <b>RefSeq Gene</b> | <b>Position (mm7)</b>          |
|-------------------|-----------------------------------|--------------------|--------------------------------|
| MCE-MIR_5004:rev  | Intron/Exon Intersection parallel | Trim8              | chr19: 46,399,437-46,399,662   |
| MCE-MIR_5005:rev  | Intron/Exon Intersection parallel | Katnb1             | chr8: 93,684,399-93,684,618    |
| MCE-MIR_5008:rev  | Exon anti                         | Irx2               | chr13: 69,562,567-69,562,652   |
| MCE-MIR_5014: fwd | Intron/Exon Intersection parallel | Ncam1              | chr9: 49,521,328-49,521,550    |
| MCE-MIR_5033:rev  | Intron anti                       | Usp4               | chr9: 108,092,003-108,092,125  |
| MCE-MIR_5046:rev  | Intron/Exon Intersection parallel | Map2k6             | chr11: 110,605,287-110,605,706 |
| MCE-MIR_5056:rev  | UTR-Intersection parallel         | Fes                | chr7: 76,247,093-76,247,318    |
| MCE-MIR_5057: fwd | UTR-Intersection parallel         | Rps6ka1            | chr4: 133,226,401-133,226,626  |
| MCE-MIR_5060:rev  | Intergenic                        |                    | chr9: 65,722,136-65,722,351    |
| MCE-MIR_5062:rev  | Intergenic                        |                    | chr7: 116,520,028-116,520,353  |
| MCE-MIR_5079:rev  | Intron/Exon Intersection anti     | Gtpbp2             | chr17: 44,294,983-44,295,068   |
| MCE-MIR_5083:rev  | UTR anti                          | Impad1             | chr4: 4,691,742-4,691,961      |
| MCE-MIR_5088:rev  | Intron/Exon Intersection anti     | Wdfy3              | chr5: 101,032,376-101,032,598  |
| MCE-MIR_5089: fwd | UTR-Intersection parallel         | Ndufa8             | chr2: 36,056,431-36,056,651    |
| MCE-MIR_5100:rev  | UTR-Intersection anti             | Tmem39b            | chr4: 129,141,306-129,141,525  |
| MCE-MIR_5105:rev  | UTR anti                          | Ebf3               | chr7: 133,599,109-133,599,232  |
| MCE-MIR_5109:rev  | Intron/Exon Intersection anti     | Glud1              | chr14: 31,763,734-31,763,954   |
| MCE-MIR_5122:rev  | Exon parallel                     | Hnrpr              | chr4: 135,705,709-135,705,807  |
| MCE-MIR_5135: fwd | UTR-Intersection parallel         | Dhrs3              | chr4: 144,305,835-144,306,055  |
| MCE-MIR_5143:rev  | Exon parallel                     | 2315P5Rik          | chr9: 25,365,859-25,365,929    |
| MCE-MIR_5152: fwd | Intron/Exon Intersection anti     | Psmbl1             | chr8: 104,536,116-104,536,337  |
| MCE-MIR_5152:rev  | Intron/Exon Intersection parallel | Psmbl1             | chr8: 104,536,116-104,536,337  |
| MCE-MIR_5167: fwd | Exon parallel                     | Lyar               | chr5: 37,315,431-37,315,485    |
| MCE-MIR_5167:rev  | Exon anti                         | Lyar               | chr5: 37,315,424-37,315,492    |
| MCE-MIR_5172: fwd | Exon anti                         | Fos                | chr12: 83,476,418-83,476,649   |
| MCE-MIR_5180: fwd | Intron/Exon Intersection parallel | Araf               | chrX: 19,287,022-19,287,447    |
| MCE-MIR_5180:rev  | Intron/Exon Intersection anti     | Araf               | chrX: 19,287,022-19,287,447    |
| MCE-MIR_5192:rev  | Intergenic                        |                    | chr2: 77,135,649-77,135,877    |
| MCE-MIR_5193:rev  | UTR parallel                      | Maml1              | chr11: 50,212,766-50,212,985   |
| MCE-MIR_5195:rev  | Intron/Exon Intersection parallel | Rad18              | chr6: 112,847,657-112,847,753  |
| MCE-MIR_5197:rev  | UTR-Intersection parallel         | Skiv2l             | chr17: 32,935,478-32,935,700   |
| MCE-MIR_5210: fwd | Exon parallel                     | Csda               | chr6: 131,443,672-131,443,706  |
| MCE-MIR_5216:rev  | Intron/Exon Intersection parallel | E2322H4Rik         | chr18: 32,166,769-32,166,939   |
| MCE-MIR_5276: fwd | UTR anti                          | Arfgap1            | chr2: 181,482,355-181,482,574  |
| MCE-MIR_5279: fwd | Intron/Exon Intersection anti     | Col1a2             | chr6: 4,490,312-4,490,390      |
| MCE-MIR_5287:rev  | Intron parallel                   | Prnpip1            | chr4: 116,987,987-116,988,076  |
| MCE-MIR_5291: fwd | Intergenic                        |                    | chr8: 103,954,361-103,954,590  |
| MCE-MIR_5295:rev  | Exon parallel                     | Tiparp             | chr3: 65,654,368-65,654,587    |
| MCE-MIR_530: fwd  | UTR parallel                      | Hdac11             | chr6: 91,256,422-91,256,642    |

| MCE-MIR          | Genomic Context                   | RefSeq Gene | Position (mm7)                   |
|------------------|-----------------------------------|-------------|----------------------------------|
| MCE-MIR_5300:rev | Intergenic                        |             | chr7_random: 1,156,234-1,156,314 |
| MCE-MIR_5303:fwd | Intron/Exon Intersection parallel | BC68171     | chrX: 70,487,617-70,487,832      |
| MCE-MIR_5328:rev | Exon anti                         | Fyco1       | chr9: 123,541,126-123,541,195    |
| MCE-MIR_5339:rev | Intron/Exon Intersection parallel | Pdcd11      | chr19: 47,030,228-47,030,365     |
| MCE-MIR_534:fwd  | UTR anti                          | C4314K11Rik | chr15: 98,817,120-98,817,342     |
| MCE-MIR_5354:rev | Intergenic                        |             | chrX: 99,253,930-99,253,953      |
| MCE-MIR_5363:fwd | Intron/Exon Intersection parallel | Hdgfrp2     | chr17: 54,259,158-54,259,378     |
| MCE-MIR_5363:rev | Intron/Exon Intersection anti     | Hdgfrp2     | chr17: 54,259,158-54,259,378     |
| MCE-MIR_5369:rev | Exon parallel                     | Wdr68       | chr11: 106,146,220-106,146,294   |
| MCE-MIR_5374:fwd | Exon parallel                     | Rdh14       | chr12: 10,426,699-10,426,918     |
| MCE-MIR_5374:rev | UTR-Intersection anti             | Rdh14       | chr12: 10,426,599-10,427,018     |
| MCE-MIR_5384:rev | Intron/Exon Intersection anti     | A6325C2Rik  | chr19: 41,452,049-41,452,282     |
| MCE-MIR_5396:rev | UTR parallel                      | Ywhae       | chr11: 75,846,917-75,847,162     |
| MCE-MIR_5403:fwd | Intron/Exon Intersection anti     | Pld4        | chr12: 110,288,853-110,289,073   |
| MCE-MIR_5411:rev | Intron/Exon Intersection anti     | Adck1       | chr12_random: 183,789-184,014    |
| MCE-MIR_5418:fwd | UTR-Intersection anti             | Eif5a       | chr11: 70,000,734-70,000,977     |
| MCE-MIR_543:fwd  | Exon anti                         | Hspa2       | chr12: 74,364,111-74,364,150     |
| MCE-MIR_5440:fwd | UTR parallel                      | Cenpb       | chr2: 130,918,130-130,918,350    |
| MCE-MIR_5443:fwd | UTR-Intersection parallel         | Sepr1       | chr4: 133,919,248-133,919,467    |
| MCE-MIR_5470:fwd | UTR-Intersection parallel         | Junb        | chr8: 83,563,410-83,563,633      |
| MCE-MIR_5473:fwd | Intergenic                        |             | chr2: 54,357,231-54,357,450      |
| MCE-MIR_5473:rev | Intergenic                        |             | chr2: 54,357,231-54,357,450      |
| MCE-MIR_5488:rev | Intron/Exon Intersection parallel | Phf12       | chr11: 78,099,630-78,099,858     |
| MCE-MIR_5504:rev | UTR-Intersection parallel         | Sacm11      | chr9: 123,307,116-123,307,272    |
| MCE-MIR_5511:rev | Intron/Exon Intersection anti     | Cxxc1       | chr18: 74,615,132-74,615,343     |
| MCE-MIR_5544:rev | UTR anti                          | Slc17a7     | chr7: 41,351,716-41,351,936      |
| MCE-MIR_557:fwd  | Intron/Exon Intersection parallel | Sepx1       | chr17: 22,921,779-22,921,998     |
| MCE-MIR_5596:rev | Exon parallel                     | Pex7        | chr10: 19,611,802-19,611,900     |
| MCE-MIR_5597:fwd | Intergenic                        |             | chr10: 79,817,201-79,817,420     |
| MCE-MIR_5606:fwd | UTR-Intersection anti             | Nfe2        | chr15: 103,244,211-103,244,430   |
| MCE-MIR_5607:rev | Intron/Exon Intersection anti     | Aplp2       | chr9: 31,057,220-31,057,439      |
| MCE-MIR_5620:fwd | Intron parallel                   | Eif5        | chr12: 109,057,046-109,057,275   |
| MCE-MIR_5623:rev | Intron/Exon Intersection parallel | Vav1        | chr17: 55,514,003-55,514,088     |
| MCE-MIR_5641:rev | Intron/Exon Intersection anti     | Dennd2a     | chr6: 39,415,498-39,415,719      |
| MCE-MIR_5699:fwd | Intron parallel                   | Sat1        | chrX: 150,016,165-150,016,398    |
| MCE-MIR_5704:rev | Exon parallel                     | Saps3       | chr19: 3,421,639-3,421,718       |
| MCE-MIR_5712:rev | Intron anti                       | Arid4b      | chr13: 13,436,064-13,436,253     |
| MCE-MIR_5745:fwd | Intron/Exon Intersection parallel | Jub         | chr14: 49,437,427-49,437,513     |
| MCE-MIR_5790:fwd | Intron/Exon Intersection anti     | Ebf4        | chr2: 130,047,219-130,047,450    |

| <b>MCE-MIR</b>    | <b>Genomic Context</b>            | <b>RefSeq Gene</b> | <b>Position (mm7)</b>          |
|-------------------|-----------------------------------|--------------------|--------------------------------|
| MCE-MIR_5864: fwd | Intron/Exon Intersection anti     | Dld                | chr12: 29,175,016-29,175,441   |
| MCE-MIR_5872: fwd | Intron/Exon Intersection parallel | Nop17              | chr7: 41,334,243-41,334,473    |
| MCE-MIR_6001: rev | Exon anti                         | Ube2e1             | chr14: 16,151,078-16,151,151   |
| MCE-MIR_6034: rev | Intergenic                        |                    | chrX: 105,950,353-105,950,376  |
| MCE-MIR_6050: rev | Intron/Exon Intersection anti     | Vim                | chr2: 13,518,528-13,518,737    |
| MCE-MIR_6054: rev | Intron anti                       | Txn14              | chr18: 80,497,696-80,498,121   |
| MCE-MIR_6055: rev | Exon anti                         | Zdhhc16            | chr19: 41,831,537-41,831,616   |
| MCE-MIR_6084: rev | UTR-Intersection anti             | Prpf39             | chr12: 62,994,730-62,994,891   |
| MCE-MIR_6107: fwd | Intron/Exon Intersection parallel | Tpm2               | chr4: 43,532,404-43,532,629    |
| MCE-MIR_6120: fwd | UTR parallel                      | Cd24a              | chr10: 43,397,308-43,397,593   |
| MCE-MIR_638: fwd  | Intron/Exon Intersection anti     | Hadhsc             | chr3: 131,081,600-131,081,825  |
| MCE-MIR_645: fwd  | Intron/Exon Intersection parallel | Mfsd3              | chr15: 76,785,008-76,785,227   |
| MCE-MIR_670: fwd  | Intron/Exon Intersection anti     | Cog1               | chr11: 113,762,900-113,763,119 |
| MCE-MIR_725: fwd  | UTR parallel                      | Pogz               | chr3: 94,754,283-94,754,502    |
| MCE-MIR_734: fwd  | Intron/Exon Intersection anti     | Nsmce1             | chr7: 121,567,593-121,567,815  |
| MCE-MIR_755: fwd  | Intron/Exon Intersection anti     | Eif2c4             | chr4: 125,941,357-125,941,566  |
| MCE-MIR_774: rev  | UTR parallel                      | Llgl1              | chr11: 60,795,425-60,795,552   |
| MCE-MIR_780: rev  | Intron/Exon Intersection anti     | Soat1              | chr1: 156,403,755-156,403,974  |
| MCE-MIR_783: rev  | Intergenic                        |                    | chr14: 18,378,732-18,378,788   |
| MCE-MIR_809: fwd  | Intron/Exon Intersection parallel | Slc25a4            | chr8: 44,985,371-44,985,519    |
| MCE-MIR_81: fwd   | Intron/Exon Intersection anti     | Zc3hc1             | chr6: 30,313,906-30,313,986    |
| MCE-MIR_822: fwd  | UTR anti                          | Ubn1               | chr16: 4,758,341-4,758,560     |
| MCE-MIR_855: fwd  | Intron/Exon Intersection anti     | Dhx15              | chr5: 51,525,012-51,525,371    |
| MCE-MIR_855: rev  | Intron/Exon Intersection parallel | Dhx15              | chr5: 51,525,012-51,525,371    |
| MCE-MIR_871: fwd  | Intron/Exon Intersection anti     | Actb               | chr5: 141,938,244-141,938,466  |
| MCE-MIR_871: rev  | Exon parallel                     | Actb               | chr5: 141,938,288-141,938,380  |
| MCE-MIR_89: fwd   | Intergenic                        |                    | chr4: 43,699,836-43,699,917    |
| MCE-MIR_936: rev  | Exon parallel                     | Ilf3               | chr9: 21,265,915-21,265,966    |
| MCE-MIR_942: rev  | Intron/Exon Intersection anti     | D4Ert429e          | chr4: 148,716,725-148,716,954  |
| MCE-MIR_946: rev  | Intergenic                        |                    | chr7: 116,937,558-116,937,577  |
| MCE-MIR_959: rev  | Intron/Exon Intersection parallel | Hadh2              | chrX: 146,762,246-146,762,465  |
| MCE-MIR_968: fwd  | Intron/Exon Intersection parallel | Pgm1               | chr5: 63,470,161-63,470,380    |
| MCE-MIR_984: rev  | Intron/Exon Intersection anti     | Dhx16              | chr17: 33,987,922-33,988,141   |
| MCE-MIR_988: fwd  | Intergenic                        |                    | chr2: 182,083,828-182,084,047  |
| MCE-MIR_993: rev  | Exon anti                         | Gmps               | chr3: 64,138,968-64,139,056    |
| MCE-MIR_995: rev  | Intron/Exon Intersection anti     | Mark2              | chr19: 7,100,827-7,101,047     |

**Supplemental Table ST2B: Chromosome location of Mouse Array Version 2 MCE-MIR hairpins with multiple hits on the genome.** This data was derived using the mm7 (Aug 2005) assembly of the Mouse Genome.

| MCE-MIR          | Genomic Context                   | RefSeq Gene  | Position (mm7)                 |
|------------------|-----------------------------------|--------------|--------------------------------|
| MCE-MIR-1015:rev | UTR-Intersection parallel         | 23116E2Rik   | chr5: 29,939,148-29,939,384    |
| MCE-MIR-1015:rev | Intergenic                        |              | chr18: 39,090,636-39,090,872   |
| MCE-MIR-1394:rev | Intron anti                       | Jarid2       | chr13: 44,319,255-44,319,481   |
| MCE-MIR-1394:rev | Intron parallel                   | 261528E23Rik | chr16: 57,252,906-57,253,132   |
| MCE-MIR-1394:rev | Intron parallel                   | Kcnp1        | chr11: 33,706,775-33,707,001   |
| MCE-MIR-1394:rev | Exon                              | Myg1         | chr17: 33,949,390-33,949,616   |
| MCE-MIR-1394:rev | Intergenic                        |              | chr18: 69,084,373-69,084,599   |
| MCE-MIR-1394:rev | Intergenic                        |              | chr15: 86,277,397-86,277,623   |
| MCE-MIR-1394:rev | Intergenic                        |              | chr13: 104,251,075-104,251,301 |
| MCE-MIR-1394:rev | Intergenic                        |              | chr14: 99,145,485-99,145,711   |
| MCE-MIR-1394:rev | Intergenic                        |              | chr8: 15,493,984-15,494,210    |
| MCE-MIR-1394:rev | Intergenic                        |              | chr6: 146,023,152-146,023,378  |
| MCE-MIR-1394:rev | Intergenic                        |              | chr6: 109,660,943-109,661,169  |
| MCE-MIR-1394:rev | Intergenic                        |              | chr6: 44,834,601-44,834,827    |
| MCE-MIR-1394:rev | Intergenic                        |              | chr2: 20,965,116-20,965,342    |
| MCE-MIR-1408:fwd | UTR-Intersection anti             | Lysmd1       | chr3: 95,012,483-95,012,702    |
| MCE-MIR-1408:fwd | Intergenic                        |              | chr12: 91,410,978-91,411,197   |
| MCE-MIR-1409:fwd | Exon parallel                     | Gvin1        | chr7: 102,055,471-102,055,692  |
| MCE-MIR-1409:fwd | Intron parallel                   | Gvin1        | chr7: 102,080,229-102,080,450  |
| MCE-MIR-1409:fwd | Intergenic                        |              | chr7: 102,494,345-102,494,566  |
| MCE-MIR-1409:fwd | Intergenic                        |              | chr7: 102,401,981-102,402,202  |
| MCE-MIR-1409:fwd | Intergenic                        |              | chr7: 102,220,998-102,221,219  |
| MCE-MIR-1409:fwd | Intergenic                        |              | chr7: 101,974,244-101,974,465  |
| MCE-MIR-1457:rev | Intron/Exon Intersection parallel | Fkbp2        | chr19: 6,798,328-6,798,550     |
| MCE-MIR-1457:rev | Intron/Exon Intersection parallel | Fkbp2        | chr19: 6,798,325-6,798,550     |
| MCE-MIR-1478:fwd | Intron/Exon Intersection anti     | Vps11        | chr9: 44,283,270-44,283,489    |
| MCE-MIR-1478:fwd | Intron/Exon Intersection parallel | Dazap2       | chr15: 100,603,243-100,603,462 |
| MCE-MIR-1478:fwd | Intergenic                        |              | chr13: 12,221,785-12,222,004   |
| MCE-MIR-1645:rev | Intron parallel                   | Terf2        | chr8: 105,684,856-105,684,964  |
| MCE-MIR-1645:rev | Intergenic                        |              | chr17: 24,728,001-24,728,083   |
| MCE-MIR-1645:rev | Intergenic                        |              | chr1: 152,910,682-152,910,773  |
| MCE-MIR-1645:rev | Intergenic                        |              | chr3: 95,284,504-95,284,612    |
| MCE-MIR-1645:rev | Intergenic                        |              | chr8: 60,956,379-60,956,487    |
| MCE-MIR-1645:rev | Intergenic                        |              | chr4: 126,110,452-126,110,560  |

| MCE-MIR          | Genomic Context                   | RefSeq Gene | Position (mm7)                      |
|------------------|-----------------------------------|-------------|-------------------------------------|
| MCE-MIR-1645:rev | Intergenic                        |             | chr12: 42,078,481-42,078,613        |
| MCE-MIR-1645:rev | Intergenic                        |             | chr9: 115,102,731-115,102,839       |
| MCE-MIR-1697:fwd | Intergenic                        |             | chr11: 77,721,537-77,721,625        |
| MCE-MIR-1697:fwd | Intergenic                        |             | chr13_random: 11,345,637-11,345,705 |
| MCE-MIR-1792:rev | Intron anti                       | Nup93       | chr8: 92,812,348-92,812,412         |
| MCE-MIR-1792:rev | Intergenic                        |             | chr15: 52,147,002-52,147,066        |
| MCE-MIR-1792:rev | Intergenic                        |             | chr12: 47,785,448-47,785,512        |
| MCE-MIR-1792:rev | Intergenic                        |             | chr9: 105,277,879-105,277,943       |
| MCE-MIR-18:fwd   | Intron/Exon Intersection parallel | Cecr5       | chr6: 120,535,883-120,536,005       |
| MCE-MIR-18:fwd   | UTR parallel                      | 11134C4Rik  | chr12: 98,535,678-98,535,753        |
| MCE-MIR-18:fwd   | Intergenic                        |             | chr17: 3,085,522-3,085,590          |
| MCE-MIR-188:fwd  | Intron parallel                   | C3314B19Rik | chr13: 64,266,185-64,266,314        |
| MCE-MIR-188:fwd  | Intergenic                        |             | chr9: 100,793,860-100,793,973       |
| MCE-MIR-1905:rev | Intron/Exon Intersection parallel | Rps1        | chr17: 25,819,632-25,820,053        |
| MCE-MIR-1905:rev | Intergenic                        |             | chr16: 20,371,226-20,371,659        |
| MCE-MIR-1905:rev | Intergenic                        |             | chr3: 95,496,198-95,496,631         |
| MCE-MIR-1931:fwd | UTR-Intersection parallel         | Ccn1l       | chr3: 66,047,602-66,047,824         |
| MCE-MIR-1931:fwd | UTR-Intersection parallel         | Ccn1l       | chr3: 66,047,602-66,047,821         |
| MCE-MIR-1998:fwd | Intron/Exon Intersection parallel | Serp1b1a    | chr13: 32,212,885-32,213,023        |
| MCE-MIR-1998:fwd | Intergenic                        |             | chr13: 32,227,564-32,227,645        |
| MCE-MIR-2092:fwd | Intron/Exon Intersection parallel | Rps14       | chr18: 61,166,402-61,166,621        |
| MCE-MIR-2092:fwd | Intergenic                        |             | chr15: 82,056,967-82,057,192        |
| MCE-MIR-2092:fwd | Intergenic                        |             | chr9: 49,051,070-49,051,295         |
| MCE-MIR-2092:fwd | Intergenic                        |             | chr3: 53,821,677-53,821,902         |
| MCE-MIR-2092:fwd | Intergenic                        |             | chr3: 88,082,168-88,082,393         |
| MCE-MIR-2099:fwd | Intron parallel                   | Ide         | chr19: 36,996,060-36,996,285        |
| MCE-MIR-2099:fwd | Intron parallel                   | Nup93       | chr8: 92,812,231-92,812,456         |
| MCE-MIR-2099:fwd | Intron parallel                   | Ide         | chr19: 36,996,040-36,996,259        |
| MCE-MIR-2099:fwd | Intron parallel                   | Nup93       | chr8: 92,812,257-92,812,476         |
| MCE-MIR-2099:fwd | Intron parallel                   | Ilir12      | chr1: 40,593,230-40,593,449         |
| MCE-MIR-2099:fwd | Intron parallel                   | Ide         | chr19: 36,996,039-36,996,285        |
| MCE-MIR-2099:fwd | Intron parallel                   | Nup93       | chr8: 92,812,231-92,812,477         |
| MCE-MIR-2099:fwd | Intron/Exon Intersection parallel | Rpli        | chrX: 69,658,832-69,658,977         |
| MCE-MIR-2099:fwd | Intergenic                        |             | chr15: 52,146,885-52,147,110        |
| MCE-MIR-2099:fwd | Intergenic                        |             | chr12: 107,414,694-107,414,919      |
| MCE-MIR-2099:fwd | Intergenic                        |             | chr12: 47,785,404-47,785,629        |
| MCE-MIR-2099:fwd | Intergenic                        |             | chr9: 105,277,835-105,278,060       |
| MCE-MIR-2099:fwd | Intergenic                        |             | chr9: 50,323,386-50,323,611         |
| MCE-MIR-2099:fwd | Intergenic                        |             | chr2: 105,405,213-105,405,438       |

| MCE-MIR          | Genomic Context                   | RefSeq Gene | Position (mm7)                    |
|------------------|-----------------------------------|-------------|-----------------------------------|
| MCE-MIR-2099:fwd | Intergenic                        |             | chr12: 107,414,674-107,414,893    |
| MCE-MIR-2099:fwd | Intergenic                        |             | chr12: 47,785,384-47,785,603      |
| MCE-MIR-2099:fwd | Intergenic                        |             | chr9: 50,323,366-50,323,585       |
| MCE-MIR-2099:fwd | Intergenic                        |             | chr5: 21,969,482-21,969,701       |
| MCE-MIR-2099:fwd | Intergenic                        |             | chr2: 105,405,193-105,405,412     |
| MCE-MIR-2099:fwd | Intergenic                        |             | chr12: 107,414,673-107,414,919    |
| MCE-MIR-2099:fwd | Intergenic                        |             | chr12: 47,785,383-47,785,629      |
| MCE-MIR-2099:fwd | Intergenic                        |             | chr9: 50,323,365-50,323,611       |
| MCE-MIR-2099:fwd | Intergenic                        |             | chr2: 105,405,192-105,405,438     |
| MCE-MIR-2111:fwd | Intron/Exon Intersection parallel | Rpl23       | chr11: 97,890,355-97,890,566      |
| MCE-MIR-2111:fwd | Intergenic                        |             | chr6: 66,857,271-66,857,496       |
| MCE-MIR-2197:fwd | Intergenic                        |             | chr1_random: 4,216,884-4,216,975  |
| MCE-MIR-2197:fwd | Intergenic                        |             | chr14: 31,603,577-31,603,666      |
| MCE-MIR-2198:fwd | Intergenic                        |             | chr3: 39,034,740-39,034,807       |
| MCE-MIR-2198:fwd | Intergenic                        |             | chr17: 61,779,344-61,779,443      |
| MCE-MIR-2198:fwd | Intergenic                        |             | chr17: 4,826,880-4,826,979        |
| MCE-MIR-2198:fwd | Intergenic                        |             | chr4: 105,170,988-105,171,105     |
| MCE-MIR-2198:fwd | Intergenic                        |             | chr6: 65,983,463-65,983,562       |
| MCE-MIR-2198:fwd | Intergenic                        |             | chr10: 57,604,176-57,604,236      |
| MCE-MIR-2198:fwd | Intergenic                        |             | chr6: 71,659,621-71,659,720       |
| MCE-MIR-2198:fwd | Intergenic                        |             | chr13: 62,457,608-62,457,707      |
| MCE-MIR-2288:fwd | UTR-Intersection anti             | Dynlt1      | chr6: 135,363,704-135,363,809     |
| MCE-MIR-2288:fwd | UTR-Intersection anti             | Dynlt1      | chr13: 45,704,309-45,704,369      |
| MCE-MIR-2339:fwd | UTR-Intersection parallel         | H3f3b       | chr11: 116,132,935-116,133,154    |
| MCE-MIR-2339:fwd | Intergenic                        |             | chr3: 104,546,025-104,546,244     |
| MCE-MIR-2339:fwd | Intergenic                        |             | chr1: 178,278,604-178,278,823     |
| MCE-MIR-2339:rev | UTR-Intersection anti             | H3f3b       | chr11: 116,133,004-116,133,112    |
| MCE-MIR-2339:rev | Intergenic                        |             | chr1: 178,278,627-178,278,726     |
| MCE-MIR-2339:rev | Intergenic                        |             | chr3: 104,546,122-104,546,220     |
| MCE-MIR-2364:rev | Intron/Exon Intersection parallel | Acta1       | chr8: 122,480,427-122,480,650     |
| MCE-MIR-2364:rev | Intron/Exon Intersection parallel | Actb        | chr5: 141,938,197-141,938,420     |
| MCE-MIR-2364:rev | Intron/Exon Intersection parallel | Acta1       | chr8: 122,480,423-122,480,650     |
| MCE-MIR-2364:rev | Intron/Exon Intersection parallel | Actb        | chr5: 141,938,193-141,938,420     |
| MCE-MIR-2364:rev | Intron/Exon Intersection parallel | Acta1       | chr8: 122,480,425-122,480,650     |
| MCE-MIR-2364:rev | Intron/Exon Intersection parallel | Actb        | chr5: 141,938,195-141,938,420     |
| MCE-MIR-2501:fwd | UTR-Intersection anti             | Nutf2       | chr8: 104,477,728-104,477,949     |
| MCE-MIR-2501:fwd | Intergenic                        |             | chr17_random: 4,025,596-4,025,817 |
| MCE-MIR-2501:fwd | Intergenic                        |             | chr19: 53,487,770-53,487,991      |
| MCE-MIR-2501:fwd | Intergenic                        |             | chr18: 10,689,457-10,689,678      |

| MCE-MIR          | Genomic Context                   | RefSeq Gene | Position (mm7)                 |
|------------------|-----------------------------------|-------------|--------------------------------|
| MCE-MIR-2501:fwd | Intergenic                        |             | chr17: 53,302,072-53,302,293   |
| MCE-MIR-2501:fwd | Intergenic                        |             | chr17: 79,235,758-79,235,979   |
| MCE-MIR-2501:fwd | Intergenic                        |             | chr10: 111,305,078-111,305,299 |
| MCE-MIR-2691:rev | Exon anti                         | Hspa8       | chr9: 40,733,439-40,733,789    |
| MCE-MIR-2691:rev | Exon anti                         | Hspa8       | chr9: 40,733,439-40,733,871    |
| MCE-MIR-2691:rev | Intergenic                        |             | chr5: 5,788,499-5,788,931      |
| MCE-MIR-2691:rev | Intergenic                        |             | chr6: 75,310,685-75,311,117    |
| MCE-MIR-2691:rev | Intergenic                        |             | chr14: 86,951,024-86,951,456   |
| MCE-MIR-2691:rev | Intergenic                        |             | chr10: 14,448,533-14,448,965   |
| MCE-MIR-2691:rev | Intergenic                        |             | chr1: 47,888,701-47,889,133    |
| MCE-MIR-2711:rev | Intron/Exon Intersection anti     | Myo1c       | chr11: 75,753,614-75,754,033   |
| MCE-MIR-2711:rev | Intron parallel                   | Eppk1       | chr15: 76,254,228-76,254,622   |
| MCE-MIR-2722:rev | UTR-Intersection parallel         | Rplp1       | chr9: 61,940,812-61,941,240    |
| MCE-MIR-2722:rev | Intergenic                        |             | chr8: 105,171,811-105,172,118  |
| MCE-MIR-2722:rev | Intergenic                        |             | chr4: 33,243,168-33,243,477    |
| MCE-MIR-2745:fwd | Intron/Exon Intersection anti     | Cxxc1       | chr18: 74,615,132-74,615,343   |
| MCE-MIR-2745:fwd | Intron/Exon Intersection anti     | Cxxc1       | chr18: 74,615,132-74,615,352   |
| MCE-MIR-2889:fwd | Intron parallel                   | Hsd17b4     | chr18: 50,512,457-50,512,653   |
| MCE-MIR-2889:fwd | UTR-Intersection parallel         | Cd63        | chr10: 128,412,069-128,412,261 |
| MCE-MIR-2953:fwd | Intergenic                        |             | chr10: 128,179,077-128,179,296 |
| MCE-MIR-2953:fwd | Intergenic                        |             | chr2: 116,266,465-116,266,684  |
| MCE-MIR-3048:rev | Intron parallel                   | Ift8        | chr3: 69,003,261-69,003,686    |
| MCE-MIR-3048:rev | Intron parallel                   | Ift8        | chr3: 69,003,261-69,003,686    |
| MCE-MIR-3048:rev | Intron/Exon Intersection parallel | Ospb19      | chr4: 108,463,646-108,464,071  |
| MCE-MIR-3057:fwd | Intron anti                       | Tiam2       | chr17: 3,461,533-3,461,952     |
| MCE-MIR-3057:fwd | Intron anti                       | Itsn2       | chr12: 4,621,796-4,622,215     |
| MCE-MIR-3057:fwd | Intergenic                        |             | chr12: 53,321,724-53,322,143   |
| MCE-MIR-3057:fwd | Intergenic                        |             | chr1: 95,348,663-95,349,082    |
| MCE-MIR-3101:rev | Intron/Exon Intersection anti     | Serpina3n   | chr12: 101,905,533-101,905,752 |
| MCE-MIR-3101:rev | Intron/Exon Intersection anti     | Serpina3m   | chr12: 101,885,862-101,886,081 |
| MCE-MIR-3101:rev | Intron/Exon Intersection anti     | Serpina3h   | chr12: 101,745,955-101,746,097 |
| MCE-MIR-3101:rev | Intron/Exon Intersection anti     | Serpina3g   | chr12: 101,733,532-101,733,660 |
| MCE-MIR-3101:rev | Intron/Exon Intersection anti     | Serpina3g   | chr12: 101,627,271-101,627,490 |
| MCE-MIR-3101:rev | Intergenic                        |             | chr12: 101,811,688-101,811,907 |
| MCE-MIR-3111:fwd | Intron parallel                   | Trpm3       | chr19: 22,550,098-22,550,258   |
| MCE-MIR-3111:fwd | Intron parallel                   | Il31ra      | chr13: 109,734,081-109,734,240 |
| MCE-MIR-3111:fwd | Intron parallel                   | Camk1d      | chr2: 5,296,315-5,296,536      |
| MCE-MIR-3111:fwd | Intron parallel                   | Trpm3       | chr19: 22,550,098-22,550,258   |
| MCE-MIR-3111:fwd | Intron parallel                   | Camk1d      | chr2: 5,296,315-5,296,551      |

| MCE-MIR          | Genomic Context                   | RefSeq Gene | Position (mm7)                   |
|------------------|-----------------------------------|-------------|----------------------------------|
| MCE-MIR-3111:fwd | Intergenic                        |             | chr18: 55,080,710-55,080,933     |
| MCE-MIR-3111:fwd | Intergenic                        |             | chr12: 78,404,144-78,404,367     |
| MCE-MIR-3111:fwd | Intergenic                        |             | chr3: 5,866,131-5,866,354        |
| MCE-MIR-3111:fwd | Intergenic                        |             | chrX: 111,462,588-111,462,795    |
| MCE-MIR-3111:fwd | Intergenic                        |             | chr18: 55,080,710-55,080,948     |
| MCE-MIR-3111:fwd | Intergenic                        |             | chr3: 5,866,116-5,866,354        |
| MCE-MIR-3111:fwd | Intergenic                        |             | chrX: 111,462,588-111,462,810    |
| MCE-MIR-3143:fwd | UTR-Intersection anti             | Trpc2       | chr7_random: 6,119,109-6,119,328 |
| MCE-MIR-3143:fwd | UTR-Intersection anti             | Trpc2       | chr7: 98,121,868-98,122,087      |
| MCE-MIR-3261:fwd | Intron anti                       | Ide         | chr19: 36,996,001-36,996,222     |
| MCE-MIR-3261:fwd | Intron anti                       | Nup93       | chr8: 92,812,294-92,812,515      |
| MCE-MIR-3261:fwd | Intron anti                       | Prps2       | chrX: 162,138,343-162,138,564    |
| MCE-MIR-3261:fwd | Intron/Exon Intersection anti     | Rpli        | chrX: 69,659,249-69,659,470      |
| MCE-MIR-3261:fwd | Intergenic                        |             | chr15: 52,146,948-52,147,169     |
| MCE-MIR-3261:fwd | Intergenic                        |             | chr12: 107,414,635-107,414,856   |
| MCE-MIR-3261:fwd | Intergenic                        |             | chr9: 105,277,776-105,277,997    |
| MCE-MIR-3261:fwd | Intergenic                        |             | chr9: 50,323,327-50,323,548      |
| MCE-MIR-3261:fwd | Intergenic                        |             | chr8: 105,528,072-105,528,293    |
| MCE-MIR-3261:fwd | Intergenic                        |             | chr2: 162,546,435-162,546,646    |
| MCE-MIR-3261:fwd | Intergenic                        |             | chr2: 136,140,175-136,140,396    |
| MCE-MIR-3261:fwd | Intergenic                        |             | chr2: 105,405,154-105,405,375    |
| MCE-MIR-3408:fwd | Intergenic                        |             | chr10: 14,449,488-14,449,580     |
| MCE-MIR-3408:fwd | Intergenic                        |             | chr1: 47,888,101-47,888,172      |
| MCE-MIR-3408:fwd | Intergenic                        |             | chr1: 46,651,184-46,651,255      |
| MCE-MIR-3439:rev | Intron/Exon Intersection parallel | 34C1Rik     | chr11: 103,021,944-103,022,153   |
| MCE-MIR-3439:rev | Intergenic                        |             | chrX: 105,701,279-105,701,498    |
| MCE-MIR-3444:rev | Exon anti                         | Rpsa        | chr9: 119,826,039-119,826,258    |
| MCE-MIR-3444:rev | Intergenic                        |             | chr1_random: 2,603,554-2,603,773 |
| MCE-MIR-3444:rev | Intergenic                        |             | chr17: 80,709,387-80,709,606     |
| MCE-MIR-3444:rev | Intergenic                        |             | chr14: 14,768,043-14,768,262     |
| MCE-MIR-3444:rev | Intergenic                        |             | chr9: 107,022,273-107,022,492    |
| MCE-MIR-3444:rev | Intergenic                        |             | chr8: 5,494,876-5,495,095        |
| MCE-MIR-3444:rev | Intergenic                        |             | chr10: 128,278,522-128,278,741   |
| MCE-MIR-3444:rev | Intergenic                        |             | chr3: 149,973,234-149,973,453    |
| MCE-MIR-3444:rev | Intergenic                        |             | chr2: 28,484,754-28,484,973      |
| MCE-MIR-3468:rev | Intron parallel                   | Pde4d       | chr13: 106,399,151-106,399,370   |
| MCE-MIR-3468:rev | Intergenic                        |             | chr19: 9,925,771-9,925,990       |
| MCE-MIR-3495:rev | Intron/Exon Intersection parallel | Pabpn1      | chr14: 49,763,977-49,764,201     |
| MCE-MIR-3495:rev | Intron/Exon Intersection parallel | Pabpn1      | chr14: 49,763,977-49,764,204     |



| MCE-MIR           | Genomic Context                   | RefSeq Gene | Position (mm7)                      |
|-------------------|-----------------------------------|-------------|-------------------------------------|
| MCE-MIR-3495:rev  | Intergenic                        |             | chr1: 190,961,487-190,961,711       |
| MCE-MIR-3495:rev  | Intergenic                        |             | chr1: 190,961,487-190,961,714       |
| MCE-MIR-3513: fwd | Intergenic                        |             | chr17: 38,066,018-38,066,442        |
| MCE-MIR-3513: fwd | Intergenic                        |             | chr17: 38,066,018-38,066,299        |
| MCE-MIR-3513: fwd | Intergenic                        |             | chr17: 38,066,042-38,066,442        |
| MCE-MIR-3513: fwd | Intergenic                        |             | chr17: 38,066,018-38,066,442        |
| MCE-MIR-3513: fwd | Intergenic                        |             | chr17: 38,066,018-38,066,442        |
| MCE-MIR-3513: fwd | Intergenic                        |             | chr17: 38,066,018-38,066,345        |
| MCE-MIR-3513: fwd | Intergenic                        |             | chr17: 38,066,101-38,066,442        |
| MCE-MIR-3513: fwd | Intergenic                        |             | chr17: 38,066,070-38,066,442        |
| MCE-MIR-3518: rev | Intron anti                       | LOC432823   | chrUn_random: 11,749,940-11,750,102 |
| MCE-MIR-3518: rev | Intron/Exon Intersection anti     | Polr2c      | chr8: 93,451,800-93,452,025         |
| MCE-MIR-3518: rev | Intergenic                        |             | chr18: 51,381,204-51,381,367        |
| MCE-MIR-3523: rev | UTR-Intersection parallel         | 23116E2Rik  | chr5: 29,939,141-29,939,380         |
| MCE-MIR-3523: rev | Intergenic                        |             | chr18: 39,090,640-39,090,879        |
| MCE-MIR-3571: rev | UTR-Intersection anti             | Rp128       | chr7: 4,368,744-4,368,967           |
| MCE-MIR-3571: rev | Intron parallel                   | 1817P19Rik  | chr4: 125,514,474-125,514,635       |
| MCE-MIR-3571: rev | Intergenic                        |             | chr6: 117,239,960-117,240,130       |
| MCE-MIR-3571: rev | Intergenic                        |             | chr5: 132,718,385-132,718,557       |
| MCE-MIR-3571: rev | Intergenic                        |             | chr1: 127,918,713-127,918,936       |
| MCE-MIR-3595: fwd | Intron anti                       | Elk1        | chrX: 19,382,536-19,382,718         |
| MCE-MIR-3595: fwd | Intron/Exon Intersection anti     | Rab37       | chr11: 115,265,853-115,266,072      |
| MCE-MIR-3609: rev | Intron parallel                   | Galc        | chr12: 95,713,319-95,713,538        |
| MCE-MIR-3609: rev | UTR parallel                      | Ptbp1       | chr10: 79,644,103-79,644,322        |
| MCE-MIR-3609: rev | Intergenic                        |             | chr15: 93,051,504-93,051,723        |
| MCE-MIR-3624: fwd | Intron/Exon Intersection parallel | Ybx1        | chr4: 118,655,515-118,655,734       |
| MCE-MIR-3624: fwd | Intergenic                        |             | chr17: 20,103,401-20,103,620        |
| MCE-MIR-3624: fwd | Intergenic                        |             | chr11: 100,041,816-100,042,035      |
| MCE-MIR-3624: fwd | Intergenic                        |             | chr7: 62,941,411-62,941,630         |
| MCE-MIR-3624: rev | Intron/Exon Intersection anti     | Ybx1        | chr4: 118,655,515-118,655,734       |
| MCE-MIR-3624: rev | Intergenic                        |             | chr17: 20,103,401-20,103,620        |
| MCE-MIR-3624: rev | Intergenic                        |             | chr11: 100,041,816-100,042,035      |
| MCE-MIR-3624: rev | Intergenic                        |             | chr7: 62,941,411-62,941,630         |
| MCE-MIR-3628: rev | Intron anti                       | Eya2        | chr2: 165,406,334-165,406,554       |
| MCE-MIR-3628: rev | UTR parallel                      | Gdi1        | chrX: 69,698,235-69,698,455         |
| MCE-MIR-3695: fwd | Intron anti                       | Usp4        | chr9: 108,091,831-108,092,259       |
| MCE-MIR-3695: fwd | Intron anti                       | Pde6a       | chr18: 61,648,551-61,648,979        |
| MCE-MIR-3695: fwd | Intron anti                       | Sh3rf1      | chr8: 59,789,762-59,790,190         |
| MCE-MIR-3695: fwd | Intron anti                       | Dcamk12     | chr3: 86,977,719-86,978,147         |

| MCE-MIR          | Genomic Context                   | RefSeq Gene | Position (mm7)                 |
|------------------|-----------------------------------|-------------|--------------------------------|
| MCE-MIR-3695:fwd | Intron anti                       | 1719N19Rik  | chr19: 58,712,336-58,712,764   |
| MCE-MIR-3695:fwd | Intron parallel                   | Terf2       | chr8: 105,684,676-105,685,104  |
| MCE-MIR-3695:fwd | Intron parallel                   | Btbd7       | chr12: 100,361,956-100,362,384 |
| MCE-MIR-3695:fwd | Intron/Exon Intersection parallel | Rps2        | chr17: 22,903,382-22,903,746   |
| MCE-MIR-3695:fwd | Intergenic                        |             | chr4: 149,217,564-149,217,953  |
| MCE-MIR-3695:fwd | Intergenic                        |             | chr1: 152,910,491-152,910,919  |
| MCE-MIR-3695:fwd | Intergenic                        |             | chr17: 29,834,853-29,835,281   |
| MCE-MIR-3695:fwd | Intergenic                        |             | chr16: 91,589,559-91,589,987   |
| MCE-MIR-3695:fwd | Intergenic                        |             | chr16: 18,231,099-18,231,527   |
| MCE-MIR-3695:fwd | Intergenic                        |             | chr15: 27,128,863-27,129,291   |
| MCE-MIR-3695:fwd | Intergenic                        |             | chr13: 72,966,160-72,966,588   |
| MCE-MIR-3695:fwd | Intergenic                        |             | chr12: 57,016,334-57,016,762   |
| MCE-MIR-3695:fwd | Intergenic                        |             | chr14: 64,021,619-64,022,047   |
| MCE-MIR-3695:fwd | Intergenic                        |             | chr14: 70,917,070-70,917,498   |
| MCE-MIR-3695:fwd | Intergenic                        |             | chr9: 115,102,551-115,102,979  |
| MCE-MIR-3695:fwd | Intergenic                        |             | chr13: 79,422,119-79,422,547   |
| MCE-MIR-3695:fwd | Intergenic                        |             | chr4: 126,110,312-126,110,740  |
| MCE-MIR-3695:fwd | Intergenic                        |             | chr2: 143,883,377-143,883,805  |
| MCE-MIR-3695:fwd | Intergenic                        |             | chr8: 104,183,990-104,184,418  |
| MCE-MIR-3695:fwd | Intergenic                        |             | chr8: 60,956,205-60,956,627    |
| MCE-MIR-3695:fwd | Intergenic                        |             | chr6: 146,861,133-146,861,561  |
| MCE-MIR-3695:fwd | Intergenic                        |             | chr6: 122,733,243-122,733,671  |
| MCE-MIR-3695:fwd | Intergenic                        |             | chr5: 140,238,562-140,238,990  |
| MCE-MIR-3695:fwd | Intergenic                        |             | chr5: 128,860,853-128,861,281  |
| MCE-MIR-3695:fwd | Intergenic                        |             | chr11: 29,553,813-29,554,241   |
| MCE-MIR-3695:fwd | Intergenic                        |             | chr4: 67,364,977-67,365,405    |
| MCE-MIR-3695:fwd | Intergenic                        |             | chr4: 123,153,897-123,154,325  |
| MCE-MIR-3695:fwd | Intergenic                        |             | chr3: 95,284,324-95,284,752    |
| MCE-MIR-3695:fwd | Intergenic                        |             | chr3: 65,607,381-65,607,809    |
| MCE-MIR-3695:fwd | Intergenic                        |             | chr4: 140,463,673-140,464,101  |
| MCE-MIR-3695:fwd | Intergenic                        |             | chrX: 47,991,261-47,991,689    |
| MCE-MIR-3754:rev | Intron/Exon Intersection anti     | Zfp289      | chr2: 91,117,881-91,117,977    |
| MCE-MIR-3754:rev | Intergenic                        |             | chr6: 112,724,886-112,724,956  |
| MCE-MIR-3820:fwd | Intron anti                       | 1817P19Rik  | chr4: 125,514,474-125,514,635  |
| MCE-MIR-3820:fwd | Intron anti                       | 1817P19Rik  | chr4: 125,514,474-125,514,640  |
| MCE-MIR-3820:fwd | UTR-Intersection parallel         | Rpl28       | chr7: 4,368,744-4,368,967      |
| MCE-MIR-3820:fwd | UTR-Intersection parallel         | Rpl28       | chr7: 4,368,739-4,368,970      |
| MCE-MIR-3820:fwd | Intergenic                        |             | chr6: 117,239,960-117,240,130  |
| MCE-MIR-3820:fwd | Intergenic                        |             | chr5: 132,718,385-132,718,557  |

| MCE-MIR          | Genomic Context               | RefSeq Gene | Position (mm7)                 |
|------------------|-------------------------------|-------------|--------------------------------|
| MCE-MIR-3820:fwd | Intergenic                    |             | chr1: 127,918,713-127,918,936  |
| MCE-MIR-3820:fwd | Intergenic                    |             | chr5: 132,718,380-132,718,557  |
| MCE-MIR-3820:fwd | Intergenic                    |             | chr1: 127,918,708-127,918,939  |
| MCE-MIR-3820:rev | UTR-Intersection anti         | Rp128       | chr7: 4,368,739-4,368,970      |
| MCE-MIR-3820:rev | UTR-Intersection anti         | Rp128       | chr7: 4,368,744-4,368,967      |
| MCE-MIR-3820:rev | Intron parallel               | 1817P19Rik  | chr4: 125,514,474-125,514,640  |
| MCE-MIR-3820:rev | Intron parallel               | 1817P19Rik  | chr4: 125,514,474-125,514,635  |
| MCE-MIR-3820:rev | Intergenic                    |             | chr5: 132,718,380-132,718,557  |
| MCE-MIR-3820:rev | Intergenic                    |             | chr1: 127,918,708-127,918,939  |
| MCE-MIR-3820:rev | Intergenic                    |             | chr6: 117,239,960-117,240,130  |
| MCE-MIR-3820:rev | Intergenic                    |             | chr5: 132,718,385-132,718,557  |
| MCE-MIR-3820:rev | Intergenic                    |             | chr1: 127,918,713-127,918,936  |
| MCE-MIR-3847:fwd | Intergenic                    |             | chr17: 38,064,906-38,065,126   |
| MCE-MIR-3847:fwd | Intergenic                    |             | chr17: 38,064,904-38,065,126   |
| MCE-MIR-3847:fwd | Intergenic                    |             | chr17: 38,064,903-38,065,126   |
| MCE-MIR-3847:rev | Intergenic                    |             | chr17: 38,064,906-38,065,126   |
| MCE-MIR-3847:rev | Intergenic                    |             | chr17: 38,064,904-38,065,126   |
| MCE-MIR-3847:rev | Intergenic                    |             | chr17: 38,064,903-38,065,126   |
| MCE-MIR-3859:rev | Intergenic                    |             | chr17: 38,064,944-38,065,027   |
| MCE-MIR-3859:rev | Intergenic                    |             | chr17: 38,064,944-38,065,027   |
| MCE-MIR-3859:rev | Intergenic                    |             | chr17: 38,064,928-38,065,050   |
| MCE-MIR-3859:rev | Intergenic                    |             | chr17: 38,064,927-38,065,050   |
| MCE-MIR-3867:rev | Exon parallel                 | Hspa8       | chr9: 40,733,482-40,733,904    |
| MCE-MIR-3867:rev | Exon parallel                 | Hspa8       | chr9: 40,733,482-40,733,789    |
| MCE-MIR-3867:rev | Intergenic                    |             | chr1: 47,888,744-47,889,166    |
| MCE-MIR-3867:rev | Intergenic                    |             | chr6: 75,310,652-75,311,074    |
| MCE-MIR-3867:rev | Intergenic                    |             | chr5: 5,788,466-5,788,888      |
| MCE-MIR-3867:rev | Intergenic                    |             | chr10: 14,448,500-14,448,922   |
| MCE-MIR-3867:rev | Intergenic                    |             | chr14: 86,950,991-86,951,413   |
| MCE-MIR-3886:fwd | Intron/Exon Intersection anti | Rpl3        | chr15: 80,164,027-80,164,252   |
| MCE-MIR-3886:fwd | Intergenic                    |             | chr13: 112,701,054-112,701,279 |
| MCE-MIR-3886:fwd | Intergenic                    |             | chr8: 73,816,674-73,816,899    |
| MCE-MIR-3886:fwd | Intergenic                    |             | chr3: 92,368,586-92,368,811    |
| MCE-MIR-3886:fwd | Intergenic                    |             | chr3: 92,261,218-92,261,443    |
| MCE-MIR-3886:fwd | Intergenic                    |             | chrX: 69,558,008-69,558,233    |
| MCE-MIR-3886:fwd | Intergenic                    |             | chrX: 11,636,426-11,636,651    |
| MCE-MIR-3886:rev | Exon parallel                 | Rpl3        | chr15: 80,164,122-80,164,201   |
| MCE-MIR-3886:rev | Intergenic                    |             | chr13: 112,701,156-112,701,226 |
| MCE-MIR-3886:rev | Intergenic                    |             | chr3: 92,261,324-92,261,386    |

| MCE-MIR          | Genomic Context                   | RefSeq Gene  | Position (mm7)                   |
|------------------|-----------------------------------|--------------|----------------------------------|
| MCE-MIR-3888:rev | UTR-Intersection parallel         | Rplp1        | chr9: 61,940,814-61,941,250      |
| MCE-MIR-3888:rev | Intergenic                        |              | chr8: 105,171,813-105,172,118    |
| MCE-MIR-3888:rev | Intergenic                        |              | chr4: 33,243,168-33,243,475      |
| MCE-MIR-399:fwd  | Intron anti                       | Hist1h3h     | chr13: 22,987,928-22,988,147     |
| MCE-MIR-399:fwd  | Intron parallel                   | Hist1h3h     | chr13: 23,104,803-23,105,022     |
| MCE-MIR-399:fwd  | Intron parallel                   | Hist1h3h     | chr13: 22,921,238-22,921,457     |
| MCE-MIR-4031:fwd | Intron/Exon Intersection anti     | Kctd13       | chr7: 123,027,178-123,027,255    |
| MCE-MIR-4031:fwd | Intron/Exon Intersection anti     | Kctd13       | chr7: 123,027,089-123,027,312    |
| MCE-MIR-406:rev  | Intron/Exon Intersection anti     | Rps19        | chr7: 21,677,786-21,678,010      |
| MCE-MIR-406:rev  | Intergenic                        |              | chr18: 41,102,685-41,102,909     |
| MCE-MIR-406:rev  | Intergenic                        |              | chr15: 37,978,926-37,979,150     |
| MCE-MIR-406:rev  | Intergenic                        |              | chr12: 108,416,562-108,416,786   |
| MCE-MIR-406:rev  | Intergenic                        |              | chr14: 48,159,183-48,159,407     |
| MCE-MIR-4061:rev | Exon parallel                     | Cyp4f14      | chr17: 31,108,242-31,108,317     |
| MCE-MIR-4061:rev | Exon parallel                     | Cyp4f13      | chr17: 31,128,067-31,128,142     |
| MCE-MIR-4061:rev | Intron/Exon Intersection parallel | Cyp4f16      | chr17: 30,748,655-30,748,812     |
| MCE-MIR-4061:rev | Intron/Exon Intersection parallel | Cyp4f16      | chr17: 30,748,667-30,748,807     |
| MCE-MIR-4061:rev | Intergenic                        |              | chr17: 30,836,449-30,836,606     |
| MCE-MIR-4061:rev | Intergenic                        |              | chr17: 30,878,024-30,878,187     |
| MCE-MIR-4061:rev | Intergenic                        |              | chr17: 30,726,592-30,726,651     |
| MCE-MIR-4061:rev | Intergenic                        |              | chr17: 30,836,461-30,836,601     |
| MCE-MIR-4063:rev | Intron anti                       | C4a          | chr17: 32,905,455-32,905,686     |
| MCE-MIR-4063:rev | Intron/Exon Intersection anti     | C4a          | chr17: 32,816,499-32,816,730     |
| MCE-MIR-4124:fwd | Intergenic                        |              | chr1_random: 5,754,580-5,754,642 |
| MCE-MIR-4124:fwd | Intergenic                        |              | chr7: 112,726,321-112,726,384    |
| MCE-MIR-4182:rev | Intron/Exon Intersection parallel | Rpl11        | chr4: 135,428,776-135,428,909    |
| MCE-MIR-4182:rev | Intergenic                        |              | chr7: 118,934,732-118,934,803    |
| MCE-MIR-4202:rev | Intron/Exon Intersection anti     | Ifitm3       | chr7: 137,427,579-137,427,799    |
| MCE-MIR-4202:rev | Intergenic                        |              | chr8: 13,870,574-13,870,794      |
| MCE-MIR-4297:fwd | Exon anti                         | Zbed4        | chr15: 88,863,361-88,863,580     |
| MCE-MIR-4297:fwd | Intergenic                        |              | chr16: 35,875,078-35,875,297     |
| MCE-MIR-4297:fwd | Intergenic                        |              | chr12: 42,589,139-42,589,358     |
| MCE-MIR-4297:fwd | Intergenic                        |              | chr3: 91,210,677-91,210,896      |
| MCE-MIR-4453:fwd | Intergenic                        |              | chr17: 21,142,256-21,142,408     |
| MCE-MIR-4453:fwd | Intergenic                        |              | chr11: 109,120,687-109,120,898   |
| MCE-MIR-4453:fwd | Intergenic                        |              | chr11: 109,120,687-109,120,897   |
| MCE-MIR-4472:fwd | Intron anti                       | Vps13a       | chr19: 16,416,859-16,417,088     |
| MCE-MIR-4472:fwd | Intron anti                       | 493431B11Rik | chr9: 83,508,048-83,508,277      |
| MCE-MIR-4472:fwd | Intron anti                       | Slc24a3      | chr2: 145,251,142-145,251,371    |

| MCE-MIR          | Genomic Context                   | RefSeq Gene | Position (mm7)                    |
|------------------|-----------------------------------|-------------|-----------------------------------|
| MCE-MIR-4472:fwd | Intron anti                       | Prim2       | chr1: 33,705,252-33,705,481       |
| MCE-MIR-4472:fwd | Intron parallel                   | BC2463      | chrUn_random: 9,646,651-9,646,880 |
| MCE-MIR-4472:fwd | Intron/Exon Intersection parallel | Rps27a      | chr11: 29,498,246-29,498,475      |
| MCE-MIR-4472:fwd | Intergenic                        |             | chr14: 41,176,018-41,176,247      |
| MCE-MIR-4472:fwd | Intergenic                        |             | chr7: 47,690,904-47,691,133       |
| MCE-MIR-4472:fwd | Intergenic                        |             | chr6: 122,494,084-122,494,313     |
| MCE-MIR-4472:fwd | Intergenic                        |             | chr4: 131,362,932-131,363,161     |
| MCE-MIR-4503:rev | Intergenic                        |             | chr7: 90,068,835-90,068,989       |
| MCE-MIR-4503:rev | Intergenic                        |             | chr13: 93,152,891-93,152,975      |
| MCE-MIR-4513:fwd | Exon anti                         | Hspa        | chr9: 40,733,534-40,733,759       |
| MCE-MIR-4513:fwd | Exon anti                         | Hspa8       | chr9: 40,733,534-40,733,765       |
| MCE-MIR-4513:fwd | Intergenic                        |             | chr14: 86,951,136-86,951,361      |
| MCE-MIR-4513:fwd | Intergenic                        |             | chr10: 14,448,645-14,448,870      |
| MCE-MIR-4513:fwd | Intergenic                        |             | chr6: 75,310,797-75,311,022       |
| MCE-MIR-4513:fwd | Intergenic                        |             | chr5: 5,788,611-5,788,836         |
| MCE-MIR-4513:fwd | Intergenic                        |             | chr1: 47,888,796-47,889,021       |
| MCE-MIR-4513:fwd | Intergenic                        |             | chr14: 86,951,130-86,951,361      |
| MCE-MIR-4513:fwd | Intergenic                        |             | chr10: 14,448,639-14,448,870      |
| MCE-MIR-4513:fwd | Intergenic                        |             | chr6: 75,310,791-75,311,022       |
| MCE-MIR-4513:fwd | Intergenic                        |             | chr5: 5,788,605-5,788,836         |
| MCE-MIR-4513:fwd | Intergenic                        |             | chr1: 47,888,796-47,889,027       |
| MCE-MIR-4625:fwd | UTR anti                          | Mark2       | chr19: 7,096,453-7,096,693        |
| MCE-MIR-4625:fwd | UTR anti                          | Mark2       | chr19: 7,096,454-7,096,693        |
| MCE-MIR-463:fwd  | Intron anti                       | Camkid      | chr2: 5,520,900-5,521,121         |
| MCE-MIR-463:fwd  | Intron parallel                   | Myrip       | chr9: 120,014,742-120,014,963     |
| MCE-MIR-463:fwd  | Intron/Exon Intersection parallel | Rpl19       | chr11: 98,137,329-98,137,550      |
| MCE-MIR-463:fwd  | Intergenic                        |             | chr18: 24,329,674-24,329,895      |
| MCE-MIR-463:fwd  | Intergenic                        |             | chr15: 7,801,944-7,802,165        |
| MCE-MIR-463:fwd  | Intergenic                        |             | chr14: 115,117,425-115,117,646    |
| MCE-MIR-463:fwd  | Intergenic                        |             | chr8: 19,469,745-19,469,966       |
| MCE-MIR-463:fwd  | Intergenic                        |             | chr7: 111,088,093-111,088,314     |
| MCE-MIR-463:fwd  | Intergenic                        |             | chr6: 71,701,285-71,701,506       |
| MCE-MIR-463:fwd  | Intergenic                        |             | chr3: 127,529,736-127,529,957     |
| MCE-MIR-463:fwd  | Intergenic                        |             | chrX: 4,545,842-4,546,063         |
| MCE-MIR-4673:fwd | Intron parallel                   | Trpm3       | chr19: 22,550,098-22,550,258      |
| MCE-MIR-4673:fwd | Intron parallel                   | Il31ra      | chr13: 109,734,081-109,734,240    |
| MCE-MIR-4673:fwd | Intron parallel                   | Camk1d      | chr2: 5,296,315-5,296,536         |
| MCE-MIR-4673:fwd | Intergenic                        |             | chr18: 55,080,710-55,080,933      |
| MCE-MIR-4673:fwd | Intergenic                        |             | chr12: 78,404,144-78,404,367      |

| MCE-MIR          | Genomic Context                   | RefSeq Gene | Position (mm7)                |
|------------------|-----------------------------------|-------------|-------------------------------|
| MCE-MIR-4673:fwd | Intergenic                        |             | chr3: 5,866,131-5,866,354     |
| MCE-MIR-4673:fwd | Intergenic                        |             | chrX: 111,462,588-111,462,795 |
| MCE-MIR-4711:fwd | Exon anti                         | Vps53       | chr11: 76,260,989-76,261,038  |
| MCE-MIR-4711:fwd | Intergenic                        |             | chr3: 133,972,806-133,972,855 |
| MCE-MIR-4714:fwd | Exon parallel                     | Acta1       | chr8: 122,480,330-122,480,558 |
| MCE-MIR-4714:fwd | Intron/Exon Intersection parallel | Actb        | chr5: 141,938,100-141,938,328 |
| MCE-MIR-4714:fwd | Intergenic                        |             | chr17: 61,555,100-61,555,328  |
| MCE-MIR-4714:fwd | Intergenic                        |             | chr9: 39,003,577-39,003,805   |
| MCE-MIR-4714:fwd | Intergenic                        |             | chr7: 4,708,201-4,708,429     |
| MCE-MIR-4714:rev | Exon anti                         | Acta1       | chr8: 122,480,330-122,480,558 |
| MCE-MIR-4714:rev | Intron/Exon Intersection anti     | Actb        | chr5: 141,938,100-141,938,328 |
| MCE-MIR-4714:rev | Intergenic                        |             | chr17: 61,555,100-61,555,328  |
| MCE-MIR-4714:rev | Intergenic                        |             | chr9: 39,003,577-39,003,805   |
| MCE-MIR-4714:rev | Intergenic                        |             | chr7: 4,708,201-4,708,429     |
| MCE-MIR-4740:fwd | Exon                              | Pigt        | chr17: 38,065,168-38,065,392  |
| MCE-MIR-4740:fwd | Intergenic                        |             | chr6: 3,153,443-3,153,667     |
| MCE-MIR-4740:fwd | Intergenic                        |             | chr5: 12,200,283-12,200,475   |
| MCE-MIR-4740:fwd | Intergenic                        |             | chrX: 22,441,474-22,441,694   |
| MCE-MIR-4763:fwd | Intron/Exon Intersection parallel | Acta1       | chr8: 122,480,427-122,480,650 |
| MCE-MIR-4763:fwd | Intron/Exon Intersection parallel | Actb        | chr5: 141,938,197-141,938,420 |
| MCE-MIR-4763:fwd | Intron/Exon Intersection parallel | Acta1       | chr8: 122,480,425-122,480,650 |
| MCE-MIR-4763:fwd | Intron/Exon Intersection parallel | Actb        | chr5: 141,938,195-141,938,420 |
| MCE-MIR-4809:fwd | Intron/Exon Intersection parallel | Rp124       | chr16: 55,824,492-55,824,874  |
| MCE-MIR-4809:fwd | Intergenic                        |             | chr11: 58,590,317-58,590,745  |
| MCE-MIR-4809:fwd | Intergenic                        |             | chr9: 115,712,898-115,713,326 |
| MCE-MIR-4809:fwd | Intergenic                        |             | chr7: 136,188,563-136,188,991 |
| MCE-MIR-4809:fwd | Intergenic                        |             | chr1: 148,863,511-148,863,939 |
| MCE-MIR-482:fwd  | Intron anti                       | Sh3rf1      | chr8: 59,789,942-59,790,050   |
| MCE-MIR-482:fwd  | Intergenic                        |             | chr12: 4,718,009-4,718,063    |
| MCE-MIR-482:fwd  | Intergenic                        |             | chr9: 31,837,726-31,837,780   |
| MCE-MIR-482:fwd  | Intergenic                        |             | chr2: 151,200,264-151,200,332 |
| MCE-MIR-482:rev  | Exon anti                         | Tuba6       | chr15: 99,022,480-99,022,610  |
| MCE-MIR-482:rev  | Exon anti                         | Tuba6       | chr15: 99,022,454-99,022,629  |
| MCE-MIR-482:rev  | Intron parallel                   | Sh3rf1      | chr8: 59,789,962-59,790,033   |
| MCE-MIR-482:rev  | Intergenic                        |             | chr9: 90,726,297-90,726,427   |
| MCE-MIR-482:rev  | Intergenic                        |             | chr9: 90,726,271-90,726,446   |
| MCE-MIR-482:rev  | Intergenic                        |             | chr12: 4,717,964-4,718,094    |
| MCE-MIR-4820:rev | Intron anti                       | Dock7       | chr4: 98,495,856-98,496,075   |
| MCE-MIR-4820:rev | Intron/Exon Intersection anti     | Rps4x       | chrX: 97,513,713-97,513,932   |

| MCE-MIR          | Genomic Context                   | RefSeq Gene | Position (mm7)                    |
|------------------|-----------------------------------|-------------|-----------------------------------|
| MCE-MIR-4820:rev | Intergenic                        |             | chr13: 3,183,605-3,183,824        |
| MCE-MIR-4820:rev | Intergenic                        |             | chr13: 34,281,228-34,281,447      |
| MCE-MIR-4820:rev | Intergenic                        |             | chr11: 60,530,986-60,531,205      |
| MCE-MIR-4820:rev | Intergenic                        |             | chr7: 39,237,065-39,237,284       |
| MCE-MIR-4820:rev | Intergenic                        |             | chrX: 134,433,125-134,433,344     |
| MCE-MIR-4820:rev | Intergenic                        |             | chr2: 83,197,096-83,197,315       |
| MCE-MIR-4830:fwd | Intron/Exon Intersection parallel | Acta1       | chr8: 122,480,278-122,480,683     |
| MCE-MIR-4830:fwd | Intron/Exon Intersection parallel | Actb        | chr5: 141,938,015-141,938,453     |
| MCE-MIR-4830:fwd | Intron/Exon Intersection parallel | Actg1       | chr11: 120,456,554-120,456,992    |
| MCE-MIR-4830:fwd | Intergenic                        |             | chr17: 61,555,015-61,555,453      |
| MCE-MIR-4830:fwd | Intergenic                        |             | chr8: 45,006,913-45,007,351       |
| MCE-MIR-4830:fwd | Intergenic                        |             | chr9: 39,003,452-39,003,890       |
| MCE-MIR-4830:fwd | Intergenic                        |             | chr13: 78,093,574-78,094,011      |
| MCE-MIR-4830:fwd | Intergenic                        |             | chr7: 4,708,187-4,708,554         |
| MCE-MIR-4830:fwd | Intergenic                        |             | chr16: 64,865,300-64,865,737      |
| MCE-MIR-4830:fwd | Intergenic                        |             | chr4: 102,939,892-102,940,330     |
| MCE-MIR-4830:fwd | Intergenic                        |             | chr16: 64,865,300-64,865,737      |
| MCE-MIR-4830:fwd | Intergenic                        |             | chr6: 133,775,552-133,775,834     |
| MCE-MIR-4978:rev | Intergenic                        |             | chr12: 4,718,355-4,718,445        |
| MCE-MIR-4978:rev | Intergenic                        |             | chr14: 69,400,153-69,400,242      |
| MCE-MIR-4978:rev | Intergenic                        |             | chr9: 90,726,688-90,726,778       |
| MCE-MIR-4978:rev | Intergenic                        |             | chr9: 31,837,345-31,837,435       |
| MCE-MIR-5030:rev | UTR parallel                      | Arf1        | chr11: 59,293,339-59,293,445      |
| MCE-MIR-5030:rev | Intergenic                        |             | chr1: 44,129,627-44,129,718       |
| MCE-MIR-504:fwd  | Intron parallel                   | Ssh2        | chr11: 77,377,052-77,377,471      |
| MCE-MIR-504:fwd  | Intron/Exon Intersection parallel | Hsp9aa1     | chr12: 108,210,319-108,210,685    |
| MCE-MIR-504:fwd  | Intergenic                        |             | chr3: 17,736,377-17,736,796       |
| MCE-MIR-5055:fwd | Exon anti                         | LOC547349   | chr17: 33,361,081-33,361,300      |
| MCE-MIR-5055:fwd | Intron anti                       | LOC195531   | chrUn_random: 1,231,668-1,231,880 |
| MCE-MIR-5055:fwd | Intron/Exon Intersection anti     | H2-Q7       | chr17: 33,494,160-33,494,372      |
| MCE-MIR-5055:fwd | Intron/Exon Intersection anti     | H2-Q2       | chr17: 33,440,080-33,440,299      |
| MCE-MIR-5055:fwd | Intron/Exon Intersection anti     | LOC547349   | chr17: 33,418,386-33,418,605      |
| MCE-MIR-5055:fwd | Intron/Exon Intersection anti     | H2-T23      | chr17: 34,134,973-34,135,192      |
| MCE-MIR-5055:fwd | Intron/Exon Intersection anti     | H2-T24      | chr17: 34,118,951-34,119,170      |
| MCE-MIR-5055:fwd | Intron parallel                   | LOC547347   | chr17: 34,255,127-34,255,346      |
| MCE-MIR-5055:fwd | Intron parallel                   | LOC547347   | chr17: 34,240,434-34,240,653      |
| MCE-MIR-5055:fwd | Intergenic                        |             | chrUn_random: 444,990-445,209     |
| MCE-MIR-5055:fwd | Intergenic                        |             | chr17: 33,479,694-33,479,891      |
| MCE-MIR-5055:fwd | Intergenic                        |             | chr17: 32,075,729-32,075,948      |

| MCE-MIR          | Genomic Context                   | RefSeq Gene | Position (mm7)                    |
|------------------|-----------------------------------|-------------|-----------------------------------|
| MCE-MIR-5055:rev | Intron anti                       | LOC547347   | chr17: 34,255,127-34,255,346      |
| MCE-MIR-5055:rev | Intron anti                       | LOC547347   | chr17: 34,240,434-34,240,653      |
| MCE-MIR-5055:rev | Exon parallel                     | LOC547349   | chr17: 33,361,081-33,361,300      |
| MCE-MIR-5055:rev | Intron parallel                   | LOC195531   | chrUn_random: 1,231,668-1,231,880 |
| MCE-MIR-5055:rev | Intron parallel                   | LOC547349   | chr17: 33,418,386-33,418,605      |
| MCE-MIR-5055:rev | Intron/Exon Intersection parallel | H2-T23      | chr17: 34,134,973-34,135,192      |
| MCE-MIR-5055:rev | Intron/Exon Intersection parallel | H2-T24      | chr17: 34,118,951-34,119,170      |
| MCE-MIR-5055:rev | Intron/Exon Intersection parallel | H2-Q7       | chr17: 33,494,160-33,494,372      |
| MCE-MIR-5055:rev | Intron/Exon Intersection parallel | H2-Q2       | chr17: 33,440,080-33,440,299      |
| MCE-MIR-5055:rev | Intergenic                        |             | chrUn_random: 444,990-445,209     |
| MCE-MIR-5055:rev | Intergenic                        |             | chr17: 32,075,729-32,075,948      |
| MCE-MIR-5055:rev | Intergenic                        |             | chr17: 33,479,694-33,479,891      |
| MCE-MIR-5061:rev | Exon parallel                     | Slc25a5     | chrX: 31,556,745-31,556,968       |
| MCE-MIR-5061:rev | Intergenic                        |             | chr1: 71,956,299-71,956,522       |
| MCE-MIR-5068:rev | Exon anti                         | Tuba6       | chr15: 99,022,783-99,023,017      |
| MCE-MIR-5068:rev | Exon anti                         | Tuba2       | chr15: 98,917,245-98,917,479      |
| MCE-MIR-5068:rev | UTR parallel                      | Slc7a11     | chr3: 50,494,935-50,495,169       |
| MCE-MIR-5068:rev | Intergenic                        |             | chr17: 5,057,102-5,057,336        |
| MCE-MIR-5068:rev | Intergenic                        |             | chr13: 109,750,040-109,750,274    |
| MCE-MIR-5068:rev | Intergenic                        |             | chr12: 49,147,482-49,147,716      |
| MCE-MIR-5068:rev | Intergenic                        |             | chr9: 90,726,600-90,726,834       |
| MCE-MIR-5068:rev | Intergenic                        |             | chr9: 31,837,289-31,837,523       |
| MCE-MIR-5068:rev | Intergenic                        |             | chr6: 79,065,703-79,065,937       |
| MCE-MIR-5068:rev | Intergenic                        |             | chr2: 151,200,527-151,200,761     |
| MCE-MIR-5141:rev | UTR-Intersection parallel         | Pycr2       | chr1: 180,884,056-180,884,277     |
| MCE-MIR-5141:rev | UTR-Intersection parallel         | Pycr2       | chr1: 180,884,051-180,884,277     |
| MCE-MIR-5236:rev | Intron anti                       | Trip4       | chr9: 65,867,877-65,868,296       |
| MCE-MIR-5236:rev | Intron anti                       | Gpr111      | chr17: 40,774,297-40,774,716      |
| MCE-MIR-5236:rev | Intron anti                       | Adamts19    | chr18: 59,319,600-59,320,019      |
| MCE-MIR-5236:rev | Intron anti                       | Pde6a       | chr18: 61,648,564-61,648,983      |
| MCE-MIR-5236:rev | Intron anti                       | Usp4        | chr9: 108,091,844-108,092,263     |
| MCE-MIR-5236:rev | Intron anti                       | Dcamk12     | chr3: 86,977,715-86,978,134       |
| MCE-MIR-5236:rev | Intron anti                       | Sh3rf1      | chr8: 59,789,775-59,790,194       |
| MCE-MIR-5236:rev | Intron anti                       | Foxj3       | chr4: 118,930,081-118,930,500     |
| MCE-MIR-5236:rev | Intron parallel                   | Atp8a2      | chr14: 54,908,477-54,908,896      |
| MCE-MIR-5236:rev | Intron parallel                   | Btbd7       | chr12: 100,361,969-100,362,388    |
| MCE-MIR-5236:rev | Intron parallel                   | Terf2       | chr8: 105,684,689-105,685,108     |
| MCE-MIR-5236:rev | Intron parallel                   | Cpa3        | chr3: 19,955,763-19,956,182       |
| MCE-MIR-5236:rev | Intron/Exon Intersection parallel | Rps2        | chr17: 22,903,378-22,903,746      |



| MCE-MIR          | Genomic Context | RefSeq Gene | Position (mm7)                |
|------------------|-----------------|-------------|-------------------------------|
| MCE-MIR-5236.rev | Intergenic      |             | chr14: 73,141,715-73,142,134  |
| MCE-MIR-5236.rev | Intergenic      |             | chr16: 91,589,572-91,589,991  |
| MCE-MIR-5236.rev | Intergenic      |             | chr17: 24,727,801-24,728,220  |
| MCE-MIR-5236.rev | Intergenic      |             | chr17: 29,834,866-29,835,285  |
| MCE-MIR-5236.rev | Intergenic      |             | chr12: 57,016,330-57,016,749  |
| MCE-MIR-5236.rev | Intergenic      |             | chr9: 92,326,503-92,326,922   |
| MCE-MIR-5236.rev | Intergenic      |             | chr12: 42,078,396-42,078,749  |
| MCE-MIR-5236.rev | Intergenic      |             | chr13: 72,966,156-72,966,575  |
| MCE-MIR-5236.rev | Intergenic      |             | chr14: 64,021,615-64,022,034  |
| MCE-MIR-5236.rev | Intergenic      |             | chr14: 51,660,025-51,660,444  |
| MCE-MIR-5236.rev | Intergenic      |             | chr14: 70,917,083-70,917,502  |
| MCE-MIR-5236.rev | Intergenic      |             | chr11: 29,553,826-29,554,245  |
| MCE-MIR-5236.rev | Intergenic      |             | chr11: 77,725,763-77,726,182  |
| MCE-MIR-5236.rev | Intergenic      |             | chr15: 27,128,859-27,129,278  |
| MCE-MIR-5236.rev | Intergenic      |             | chr8: 104,184,003-104,184,422 |
| MCE-MIR-5236.rev | Intergenic      |             | chr8: 82,126,230-82,126,649   |
| MCE-MIR-5236.rev | Intergenic      |             | chr8: 82,178,709-82,179,128   |
| MCE-MIR-5236.rev | Intergenic      |             | chr9: 14,222,222-14,222,639   |
| MCE-MIR-5236.rev | Intergenic      |             | chr13: 79,422,132-79,422,551  |
| MCE-MIR-5236.rev | Intergenic      |             | chr9: 115,102,564-115,102,983 |
| MCE-MIR-5236.rev | Intergenic      |             | chr16: 18,231,112-18,231,531  |
| MCE-MIR-5236.rev | Intergenic      |             | chr3: 95,284,337-95,284,756   |
| MCE-MIR-5236.rev | Intergenic      |             | chr6: 146,861,129-146,861,548 |
| MCE-MIR-5236.rev | Intergenic      |             | chr6: 122,733,239-122,733,658 |
| MCE-MIR-5236.rev | Intergenic      |             | chr5: 140,238,575-140,238,994 |
| MCE-MIR-5236.rev | Intergenic      |             | chr5: 128,860,866-128,861,285 |
| MCE-MIR-5236.rev | Intergenic      |             | chr4: 140,463,669-140,464,088 |
| MCE-MIR-5236.rev | Intergenic      |             | chr4: 126,110,308-126,110,727 |
| MCE-MIR-5236.rev | Intergenic      |             | chr4: 67,364,973-67,365,392   |
| MCE-MIR-5236.rev | Intergenic      |             | chr7: 31,382,937-31,383,356   |
| MCE-MIR-5236.rev | Intergenic      |             | chr4: 21,674,636-21,674,945   |
| MCE-MIR-5236.rev | Intergenic      |             | chr3: 65,607,394-65,607,813   |
| MCE-MIR-5236.rev | Intergenic      |             | chrX: 47,991,257-47,991,676   |
| MCE-MIR-5236.rev | Intergenic      |             | chr2: 170,746,770-170,747,189 |
| MCE-MIR-5236.rev | Intergenic      |             | chr2: 143,883,390-143,883,809 |
| MCE-MIR-5236.rev | Intergenic      |             | chr1: 152,910,504-152,910,923 |
| MCE-MIR-5236.rev | Intergenic      |             | chr1: 7,773,664-7,774,083     |
| MCE-MIR-5236.rev | Intergenic      |             | chr4: 123,153,910-123,154,329 |
| MCE-MIR-5236.rev | Intergenic      |             | chr8: 60,956,212-60,956,631   |

| MCE-MIR          | Genomic Context                   | RefSeq Gene | Position (mm7)                   |
|------------------|-----------------------------------|-------------|----------------------------------|
| MCE-MIR-5236:rev | Intergenic                        |             | chr10: 107,944,590-107,945,009   |
| MCE-MIR-5236:rev | Intergenic                        |             | chr7: 106,217,643-106,218,062    |
| MCE-MIR-5260:fwd | Exon parallel                     | Hspa8       | chr9: 40,733,476-40,733,902      |
| MCE-MIR-5260:fwd | Exon parallel                     | Hspa8       | chr9: 40,733,476-40,733,789      |
| MCE-MIR-5260:fwd | Intergenic                        |             | chr1: 47,888,738-47,889,164      |
| MCE-MIR-5260:fwd | Intergenic                        |             | chr5: 5,788,468-5,788,894        |
| MCE-MIR-5260:fwd | Intergenic                        |             | chr14: 86,950,993-86,951,419     |
| MCE-MIR-5260:fwd | Intergenic                        |             | chr6: 75,310,654-75,311,080      |
| MCE-MIR-5260:fwd | Intergenic                        |             | chr10: 14,448,502-14,448,928     |
| MCE-MIR-5300:fwd | Exon parallel                     | Socs6       | chr18: 89,192,777-89,192,996     |
| MCE-MIR-5300:fwd | Intergenic                        |             | chr7_random: 1,156,142-1,156,361 |
| MCE-MIR-5322:fwd | Intron anti                       | Abr         | chr11: 76,595,932-76,596,151     |
| MCE-MIR-5322:fwd | Intron/Exon Intersection parallel | Rpli8       | chr7: 41,896,501-41,896,720      |
| MCE-MIR-5322:fwd | UTR-Intersection parallel         | Rpli8       | chr6: 128,336,952-128,337,171    |
| MCE-MIR-5322:fwd | UTR-Intersection parallel         | Rpli8       | chr2: 36,815,128-36,815,347      |
| MCE-MIR-5322:fwd | Intergenic                        |             | chr11: 85,142,693-85,142,912     |
| MCE-MIR-5322:fwd | Intergenic                        |             | chr6: 83,867,399-83,867,618      |
| MCE-MIR-5322:fwd | Intergenic                        |             | chr5: 6,786,529-6,786,748        |
| MCE-MIR-5322:fwd | Intergenic                        |             | chr2: 167,332,362-167,332,581    |
| MCE-MIR-5322:rev | Exon anti                         | Rpl18       | chr6: 128,337,057-128,337,109    |
| MCE-MIR-5322:rev | Intron parallel                   | Abr         | chr11: 76,596,000-76,596,068     |
| MCE-MIR-5322:rev | Intergenic                        |             | chr5: 6,786,535-6,786,673        |
| MCE-MIR-5322:rev | Intergenic                        |             | chr6: 83,867,499-83,867,594      |
| MCE-MIR-5322:rev | Intergenic                        |             | chr2: 167,332,476-167,332,539    |
| MCE-MIR-5340:fwd | Intron/Exon Intersection anti     | Siglecf     | chr7: 39,530,859-39,531,079      |
| MCE-MIR-5340:fwd | UTR anti                          | Siglecg     | chr7: 39,587,422-39,587,642      |
| MCE-MIR-5340:fwd | Intergenic                        |             | chr7: 40,964,691-40,964,878      |
| MCE-MIR-5366:rev | Intergenic                        |             | chrX: 69,611,705-69,611,925      |
| MCE-MIR-5366:rev | Intergenic                        |             | chrX: 69,611,711-69,611,933      |
| MCE-MIR-5366:rev | Intergenic                        |             | chrX: 69,611,702-69,611,939      |
| MCE-MIR-5367:rev | UTR-Intersection anti             | Actg1       | chr11: 120,455,334-120,455,567   |
| MCE-MIR-5367:rev | Intergenic                        |             | chr13: 78,094,509-78,094,742     |
| MCE-MIR-5367:rev | Intergenic                        |             | chr8: 45,007,857-45,008,090      |
| MCE-MIR-5367:rev | Intergenic                        |             | chr4: 102,940,836-102,941,069    |
| MCE-MIR-5389:fwd | Intergenic                        |             | chr17: 38,064,906-38,065,126     |
| MCE-MIR-5389:fwd | Intergenic                        |             | chr17: 38,064,904-38,065,126     |
| MCE-MIR-5389:rev | Intergenic                        |             | chr17: 38,064,906-38,065,126     |
| MCE-MIR-5389:rev | Intergenic                        |             | chr17: 38,064,904-38,065,126     |
| MCE-MIR-5399:fwd | Intron parallel                   | Tmem63c     | chr12: 85,070,070-85,070,222     |

| MCE-MIR          | Genomic Context               | RefSeq Gene | Position (mm7)                 |
|------------------|-------------------------------|-------------|--------------------------------|
| MCE-MIR-5399:fwd | Intergenic                    |             | chr15: 37,978,963-37,979,202   |
| MCE-MIR-5399:fwd | Intergenic                    |             | chr12: 108,416,599-108,416,838 |
| MCE-MIR-5399:fwd | Intergenic                    |             | chr8: 39,473,997-39,474,236    |
| MCE-MIR-5399:fwd | Intergenic                    |             | chr4: 146,811,292-146,811,531  |
| MCE-MIR-5399:fwd | Intergenic                    |             | chr2: 139,813,858-139,814,097  |
| MCE-MIR-5406:rev | Exon parallel                 | Tuba1       | chr15: 98,936,028-98,936,250   |
| MCE-MIR-5406:rev | Exon parallel                 | Tuba2       | chr15: 98,917,574-98,917,796   |
| MCE-MIR-5406:rev | Exon parallel                 | Tuba6       | chr15: 99,022,466-99,022,688   |
| MCE-MIR-5406:rev | Intergenic                    |             | chr18: 82,688,224-82,688,446   |
| MCE-MIR-5406:rev | Intergenic                    |             | chr17: 5,057,442-5,057,664     |
| MCE-MIR-5406:rev | Intergenic                    |             | chr13: 109,750,369-109,750,591 |
| MCE-MIR-5406:rev | Intergenic                    |             | chr12: 4,717,950-4,718,172     |
| MCE-MIR-5406:rev | Intergenic                    |             | chr9: 90,726,283-90,726,505    |
| MCE-MIR-5454:rev | UTR anti                      | Pcyt2       | chr11: 120,719,200-120,719,421 |
| MCE-MIR-5454:rev | Intergenic                    |             | chr1: 61,964,670-61,964,891    |
| MCE-MIR-5503:rev | Intron anti                   | Gabrb1      | chr5: 71,417,941-71,418,160    |
| MCE-MIR-5503:rev | Intron/Exon Intersection anti | Rp15        | chr5: 107,080,988-107,081,207  |
| MCE-MIR-5503:rev | Intergenic                    |             | chr18: 71,041,666-71,041,885   |
| MCE-MIR-5503:rev | Intergenic                    |             | chr15: 30,117,809-30,118,028   |
| MCE-MIR-5503:rev | Intergenic                    |             | chr15: 23,032,075-23,032,271   |
| MCE-MIR-5503:rev | Intergenic                    |             | chr13: 22,042,367-22,042,586   |
| MCE-MIR-5503:rev | Intergenic                    |             | chr12: 117,662,922-117,663,141 |
| MCE-MIR-5503:rev | Intergenic                    |             | chr7: 110,621,701-110,621,920  |
| MCE-MIR-5503:rev | Intergenic                    |             | chr6: 83,626,564-83,626,783    |
| MCE-MIR-5503:rev | Intergenic                    |             | chr1: 15,047,493-15,047,712    |
| MCE-MIR-5581:fwd | Intron anti                   | Dlgh1       | chr16: 31,486,686-31,486,751   |
| MCE-MIR-5581:fwd | Intron anti                   | Rnf13       | chr3: 57,895,615-57,895,689    |
| MCE-MIR-5581:fwd | Intergenic                    |             | chr1: 71,397,397-71,397,459    |
| MCE-MIR-5581:fwd | Intergenic                    |             | chr2: 152,208,668-152,208,730  |
| MCE-MIR-5581:rev | Intron parallel               | Ostf1       | chr19: 18,282,799-18,282,860   |
| MCE-MIR-5581:rev | Intron parallel               | Nrxn3       | chr12: 87,551,045-87,551,193   |
| MCE-MIR-5581:rev | Intergenic                    |             | chr17: 22,091,766-22,091,870   |
| MCE-MIR-5581:rev | Intergenic                    |             | chr10: 102,916,999-102,917,104 |
| MCE-MIR-5581:rev | Intergenic                    |             | chr7: 12,030,397-12,030,459    |
| MCE-MIR-5581:rev | Intergenic                    |             | chr2: 152,208,668-152,208,730  |
| MCE-MIR-5581:rev | Intergenic                    |             | chr1: 152,090,071-152,090,129  |
| MCE-MIR-5598:fwd | Intron anti                   | Rab38       | chr7: 84,385,732-84,386,157    |
| MCE-MIR-5598:fwd | Intron anti                   | Reln        | chr5: 20,927,608-20,928,033    |
| MCE-MIR-5598:fwd | Intron anti                   | Rfx4        | chr10: 84,335,507-84,335,932   |

| MCE-MIR          | Genomic Context                   | RefSeq Gene  | Position (mm7)                    |
|------------------|-----------------------------------|--------------|-----------------------------------|
| MCE-MIR-5598:fwd | Intron anti                       | 843426H19Rik | chrUn_random: 9,276,197-9,276,622 |
| MCE-MIR-5598:fwd | Intron anti                       | Myo5a        | chr9: 75,135,734-75,136,159       |
| MCE-MIR-5598:fwd | Intron anti                       | Acin1        | chr14: 49,548,210-49,548,635      |
| MCE-MIR-5598:fwd | Intron anti                       | Nkd2         | chr13: 70,762,910-70,763,335      |
| MCE-MIR-5598:fwd | Intron parallel                   | Heph         | chrX: 91,812,386-91,812,811       |
| MCE-MIR-5598:fwd | Intron parallel                   | Cpb2         | chr14: 69,945,197-69,945,611      |
| MCE-MIR-5598:fwd | Intron/Exon Intersection parallel | Rpl17        | chr18: 75,397,782-75,398,207      |
| MCE-MIR-5598:fwd | Intergenic                        |              | chr7: 24,507,679-24,508,104       |
| MCE-MIR-5598:fwd | Intergenic                        |              | chr6: 34,970,399-34,970,824       |
| MCE-MIR-5598:fwd | Intergenic                        |              | chr1: 170,607,560-170,607,985     |
| MCE-MIR-5598:fwd | Intergenic                        |              | chr14: 34,451,553-34,451,926      |
| MCE-MIR-5598:fwd | Intergenic                        |              | chr1: 93,214,494-93,214,919       |
| MCE-MIR-5598:fwd | Intergenic                        |              | chr1: 77,276,612-77,277,037       |
| MCE-MIR-5598:fwd | Intergenic                        |              | chr3: 49,655,593-49,656,018       |
| MCE-MIR-5598:fwd | Intergenic                        |              | chr2: 166,827,831-166,828,256     |
| MCE-MIR-5598:fwd | Intergenic                        |              | chr5: 21,650,510-21,650,935       |
| MCE-MIR-5598:fwd | Intergenic                        |              | chr4: 63,329,234-63,329,659       |
| MCE-MIR-5598:fwd | Intergenic                        |              | chrX: 35,229,253-35,229,678       |
| MCE-MIR-5598:fwd | Intergenic                        |              | chr1: 43,511,116-43,511,529       |
| MCE-MIR-5598:fwd | Intergenic                        |              | chr12: 65,451,873-65,452,298      |
| MCE-MIR-5598:fwd | Intergenic                        |              | chr10: 14,289,375-14,289,800      |
| MCE-MIR-5598:fwd | Intergenic                        |              | chr7: 33,009,567-33,009,992       |
| MCE-MIR-5598:fwd | Intergenic                        |              | chr11: 96,501,287-96,501,712      |
| MCE-MIR-5598:fwd | Intergenic                        |              | chr14: 47,403,285-47,403,710      |
| MCE-MIR-5598:fwd | Intergenic                        |              | chr13: 77,194,226-77,194,651      |
| MCE-MIR-5598:fwd | Intergenic                        |              | chr12: 69,994,851-69,995,276      |
| MCE-MIR-5598:fwd | Intergenic                        |              | chr7: 68,498,389-68,498,814       |
| MCE-MIR-5598:fwd | Intergenic                        |              | chr12: 80,536,410-80,536,835      |
| MCE-MIR-5598:fwd | Intergenic                        |              | chr13: 96,104,099-96,104,524      |
| MCE-MIR-5598:fwd | Intergenic                        |              | chr13: 63,179,400-63,179,825      |
| MCE-MIR-5598:fwd | Intergenic                        |              | chr15: 73,508,900-73,509,325      |
| MCE-MIR-5598:fwd | Intergenic                        |              | chr15: 59,305,047-59,305,472      |
| MCE-MIR-5598:fwd | Intergenic                        |              | chr16: 20,346,207-20,346,632      |
| MCE-MIR-5598:fwd | Intergenic                        |              | chr18: 38,621,165-38,621,590      |
| MCE-MIR-5598:fwd | Intergenic                        |              | chr18_random: 702,105-702,530     |
| MCE-MIR-5598:fwd | Intergenic                        |              | chr14: 47,403,286-47,403,710      |
| MCE-MIR-5598:fwd | Intergenic                        |              | chr14: 97,441,159-97,441,584      |
| MCE-MIR-5643:fwd | Intron/Exon Intersection anti     | Raver1       | chr9: 20,951,906-20,952,125       |
| MCE-MIR-5643:fwd | Intergenic                        |              | chr9_random: 4,771,908-4,772,127  |

| MCE-MIR          | Genomic Context               | RefSeq Gene | Position (mm7)                 |
|------------------|-------------------------------|-------------|--------------------------------|
| MCE-MIR-5736:rev | UTR parallel                  | Actg1       | chr11: 120,454,675-120,454,897 |
| MCE-MIR-5736:rev | Intergenic                    |             | chr17: 61,556,505-61,556,727   |
| MCE-MIR-5736:rev | Intergenic                    |             | chr16: 64,863,961-64,864,122   |
| MCE-MIR-5736:rev | Intergenic                    |             | chr13: 78,095,179-78,095,396   |
| MCE-MIR-5736:rev | Intergenic                    |             | chr10: 24,807,095-24,807,258   |
| MCE-MIR-5736:rev | Intergenic                    |             | chr7: 4,705,858-4,706,080      |
| MCE-MIR-5736:rev | Intergenic                    |             | chr4: 102,941,506-102,941,728  |
| MCE-MIR-5736:rev | Intergenic                    |             | chrX: 46,310,139-46,310,361    |
| MCE-MIR-5914:rev | Intron/Exon Intersection anti | Ebf4        | chr2: 130,047,219-130,047,453  |
| MCE-MIR-5914:rev | Intron/Exon Intersection anti | Ebf4        | chr2: 130,047,219-130,047,450  |
| MCE-MIR-5970:rev | Intergenic                    |             | chr12: 78,591,953-78,592,053   |
| MCE-MIR-5970:rev | Intergenic                    |             | chr7: 20,734,341-20,734,432    |
| MCE-MIR-6026:fwd | UTR parallel                  | Actg1       | chr11: 120,454,675-120,454,897 |
| MCE-MIR-6026:fwd | UTR parallel                  | Actg1       | chr11: 120,454,661-120,454,897 |
| MCE-MIR-6026:fwd | Intergenic                    |             | chr17: 61,556,505-61,556,727   |
| MCE-MIR-6026:fwd | Intergenic                    |             | chr16: 64,863,961-64,864,122   |
| MCE-MIR-6026:fwd | Intergenic                    |             | chr13: 78,095,179-78,095,396   |
| MCE-MIR-6026:fwd | Intergenic                    |             | chr10: 24,807,095-24,807,258   |
| MCE-MIR-6026:fwd | Intergenic                    |             | chr7: 4,705,858-4,706,080      |
| MCE-MIR-6026:fwd | Intergenic                    |             | chr4: 102,941,506-102,941,728  |
| MCE-MIR-6026:fwd | Intergenic                    |             | chrX: 46,310,139-46,310,361    |
| MCE-MIR-6026:fwd | Intergenic                    |             | chr16: 64,863,886-64,864,122   |
| MCE-MIR-6026:fwd | Intergenic                    |             | chr13: 78,095,179-78,095,396   |
| MCE-MIR-6026:fwd | Intergenic                    |             | chr7: 4,705,844-4,706,080      |
| MCE-MIR-6026:fwd | Intergenic                    |             | chr4: 102,941,506-102,941,742  |
| MCE-MIR-6026:rev | UTR anti                      | Actg1       | chr11: 120,454,675-120,454,897 |
| MCE-MIR-6026:rev | UTR anti                      | Actg1       | chr11: 120,454,661-120,454,897 |
| MCE-MIR-6026:rev | Intergenic                    |             | chr17: 61,556,505-61,556,727   |
| MCE-MIR-6026:rev | Intergenic                    |             | chr16: 64,863,961-64,864,122   |
| MCE-MIR-6026:rev | Intergenic                    |             | chr13: 78,095,179-78,095,396   |
| MCE-MIR-6026:rev | Intergenic                    |             | chr10: 24,807,095-24,807,258   |
| MCE-MIR-6026:rev | Intergenic                    |             | chr7: 4,705,858-4,706,080      |
| MCE-MIR-6026:rev | Intergenic                    |             | chr4: 102,941,506-102,941,728  |
| MCE-MIR-6026:rev | Intergenic                    |             | chrX: 46,310,139-46,310,361    |
| MCE-MIR-6026:rev | Intergenic                    |             | chr16: 64,863,886-64,864,122   |
| MCE-MIR-6026:rev | Intergenic                    |             | chr13: 78,095,179-78,095,396   |
| MCE-MIR-6026:rev | Intergenic                    |             | chr7: 4,705,844-4,706,080      |
| MCE-MIR-6026:rev | Intergenic                    |             | chr4: 102,941,506-102,941,742  |
| MCE-MIR-6033:fwd | Intron parallel               | Dock7       | chr4: 98,495,756-98,496,176    |

| MCE-MIR          | Genomic Context                   | RefSeq Gene | Position (mm7)                |
|------------------|-----------------------------------|-------------|-------------------------------|
| MCE-MIR-6033:fwd | Intron/Exon Intersection parallel | Rps4x       | chrX: 97,513,613-97,514,033   |
| MCE-MIR-6033:fwd | Intergenic                        |             | chr13: 3,183,504-3,183,924    |
| MCE-MIR-6033:fwd | Intergenic                        |             | chr7: 39,236,965-39,237,385   |
| MCE-MIR-6033:fwd | Intergenic                        |             | chr13: 34,281,128-34,281,548  |
| MCE-MIR-6033:fwd | Intergenic                        |             | chrX: 134,433,025-134,433,445 |
| MCE-MIR-6033:fwd | Intergenic                        |             | chr2: 83,196,996-83,197,416   |
| MCE-MIR-6033:fwd | Intergenic                        |             | chr11: 60,530,886-60,531,306  |
| MCE-MIR-689:rev  | UTR parallel                      | Hnrpk       | chr13: 57,486,551-57,486,971  |
| MCE-MIR-689:rev  | Intergenic                        |             | chr13: 88,334,155-88,334,574  |
| MCE-MIR-689:rev  | Intergenic                        |             | chr7: 79,679,026-79,679,389   |
| MCE-MIR-777:rev  | Intergenic                        |             | chr4: 102,940,999-102,941,062 |
| MCE-MIR-777:rev  | Intergenic                        |             | chr9: 39,005,064-39,005,135   |
| MCE-MIR-777:rev  | Intergenic                        |             | chr6: 133,774,818-133,774,902 |
| MCE-MIR-777:rev  | Intergenic                        |             | chr4: 102,940,985-102,941,069 |
| MCE-MIR-777:rev  | Intergenic                        |             | chr8: 63,558,564-63,558,651   |
| MCE-MIR-782:rev  | UTR anti                          | Aes         | chr10: 81,360,195-81,360,288  |
| MCE-MIR-782:rev  | Intergenic                        |             | chr7: 16,868,694-16,868,779   |
| MCE-MIR-810:rev  | Exon parallel                     | Tuba1       | chr15: 98,935,676-98,935,736  |
| MCE-MIR-810:rev  | Exon parallel                     | Tuba2       | chr15: 98,917,222-98,917,282  |
