# Supplementary material for: Novel MicroRNA Candidates and miRNA-mRNA Pairs in Embryonic Stem (ES) Cells
Source: PubMed Central journal article supplement (PMC2481296; doi:10.1371/journal.pone.0002548), 2008-07-02
Supplement: pone.0002548.s010.pdf [file pone.0002548.s010.pdf]

| MCE ID           | CELL <sup>5</sup>             | miRBase/piRNA | NAR <sup>19</sup> | NATURE <sup>6</sup> | PNAS <sup>17</sup> | EvoFold <sup>33</sup> |
|------------------|-------------------------------|---------------|-------------------|---------------------|--------------------|-----------------------|
| MCE-MIR-1190:rev | cand145                       |               |                   |                     |                    |                       |
| MCE-MIR-1290:fwd | cand895                       |               |                   |                     |                    |                       |
| MCE-MIR-1307:fwd |                               | mmu-mir-706   | miRNA338          |                     |                    |                       |
| MCE-MIR-1323:rev | cand181                       |               |                   |                     |                    |                       |
| MCE-MIR-1409:fwd | cand452                       |               |                   |                     |                    |                       |
| MCE-MIR-1457:fwd | cand368                       |               |                   |                     |                    |                       |
| MCE-MIR-1496:rev | cand363                       |               |                   |                     |                    |                       |
| MCE-MIR-1509:fwd | cand720                       |               |                   |                     |                    |                       |
| MCE-MIR-1522:fwd | cand931                       |               |                   |                     |                    |                       |
| MCE-MIR-1539:fwd | cand368                       |               |                   |                     |                    |                       |
| MCE-MIR-174:rev  | cand426                       |               |                   |                     |                    |                       |
| MCE-MIR-1776:rev | cand406                       |               |                   |                     |                    |                       |
| MCE-MIR-1783:rev | cand879                       |               |                   |                     |                    |                       |
| MCE-MIR-1817:rev | cand437                       |               |                   |                     |                    |                       |
| MCE-MIR-1915:fwd | cand17<br>cand661<br>cand913  |               |                   |                     |                    |                       |
| MCE-MIR-1915:rev | cand829                       |               |                   |                     |                    |                       |
| MCE-MIR-1916:fwd | cand17<br>cand661<br>cand913  |               |                   |                     |                    |                       |
| MCE-MIR-1916:rev | cand829                       |               |                   |                     |                    |                       |
| MCE-MIR-1963:fwd | cand92                        |               |                   |                     |                    |                       |
| MCE-MIR-2006:fwd | cand407                       |               |                   |                     |                    |                       |
| MCE-MIR-2006:rev | cand719                       |               |                   |                     |                    |                       |
| MCE-MIR-2035:fwd | cand759                       |               |                   |                     |                    |                       |
| MCE-MIR-2035:rev | cand581<br>cand704<br>cand793 |               |                   |                     |                    |                       |
| MCE-MIR-2040:fwd | cand581<br>cand793            |               |                   |                     |                    |                       |
| MCE-MIR-2067:fwd | cand581<br>cand704            |               |                   |                     |                    |                       |
| MCE-MIR-2067:rev | cand341                       |               |                   |                     |                    |                       |
|                  | cand581<br>cand793            |               |                   |                     |                    |                       |
| MCE-MIR-2069:rev | cand581<br>cand704<br>cand793 |               |                   |                     |                    |                       |

| MCE ID           | CELL <sup>5</sup>  | miRBase/piRNA                    | NAR <sup>19</sup> | NATURE <sup>6</sup> | PNAS <sup>17</sup>               | EvoFold <sup>33</sup> |
|------------------|--------------------|----------------------------------|-------------------|---------------------|----------------------------------|-----------------------|
| MCE-MIR-2070:fwd | cand793            |                                  |                   |                     |                                  |                       |
| MCE-MIR-2070:rev | cand581            |                                  |                   |                     |                                  |                       |
| MCE-MIR-2092:rev | cand513            |                                  |                   |                     |                                  | EvoFold               |
| MCE-MIR-2098:rev |                    | mmu-mir-706                      | miRNA338          |                     |                                  |                       |
| MCE-MIR-217:rev  | cand677            |                                  |                   |                     |                                  |                       |
| MCE-MIR-218:rev  | cand677            |                                  |                   |                     |                                  |                       |
| MCE-MIR-2246:rev | cand525            |                                  |                   |                     |                                  |                       |
| MCE-MIR-2247:rev | cand525            |                                  |                   |                     |                                  |                       |
| MCE-MIR-2271:rev | cand818            |                                  |                   |                     |                                  |                       |
| MCE-MIR-2272:rev | cand818            |                                  |                   |                     |                                  |                       |
| MCE-MIR-2287:fwd | cand829            |                                  |                   |                     |                                  |                       |
| MCE-MIR-2287:rev | cand17<br>cand913  |                                  |                   |                     |                                  |                       |
| MCE-MIR-2323:rev | cand379<br>cand685 |                                  |                   |                     |                                  |                       |
| MCE-MIR-2351:fwd | cand793            |                                  |                   |                     |                                  |                       |
| MCE-MIR-2402:rev | cand793            |                                  |                   |                     |                                  |                       |
| MCE-MIR-240:rev  | cand893            |                                  |                   |                     |                                  |                       |
| MCE-MIR-2413:fwd | cand17<br>cand913  |                                  |                   |                     |                                  |                       |
| MCE-MIR-2413:rev | cand829            |                                  |                   |                     |                                  |                       |
| MCE-MIR-2415:fwd | cand519            |                                  |                   |                     |                                  |                       |
| MCE-MIR-243:rev  | cand677<br>cand704 |                                  |                   |                     |                                  |                       |
| MCE-MIR-2451:rev | cand775            |                                  |                   |                     |                                  |                       |
| MCE-MIR-2561:fwd | cand488            |                                  |                   |                     |                                  |                       |
| MCE-MIR-2628:rev | cand341<br>cand581 |                                  |                   |                     |                                  |                       |
| MCE-MIR-2666:rev | cand341<br>cand581 |                                  |                   |                     |                                  |                       |
| MCE-MIR-2709:rev | cand710            |                                  |                   |                     |                                  |                       |
| MCE-MIR-2728:rev | cand914            |                                  |                   |                     |                                  |                       |
| MCE-MIR-2733:fwd | cand503            |                                  |                   |                     |                                  |                       |
| MCE-MIR-273:fwd  | cand703            |                                  |                   |                     |                                  |                       |
| MCE-MIR-2847:fwd | cand950            |                                  |                   |                     |                                  |                       |
| MCE-MIR-293:rev  | cand689            |                                  |                   |                     |                                  |                       |
| MCE-MIR-3017:fwd | cand779            |                                  |                   |                     |                                  |                       |
| MCE-MIR-3032:fwd | cand30             | mmu-mir-142-3p<br>mmu-mir-142-5p |                   |                     | HSA-MIR-142-3P<br>HSA-MIR-142-5P | EvoFold               |

| MCE ID            | CELL <sup>5</sup>  | miRBase/piRNA              | NAR <sup>19</sup>    | NATURE <sup>6</sup> | PNAS <sup>17</sup> | EvoFold <sup>33</sup> |
|-------------------|--------------------|----------------------------|----------------------|---------------------|--------------------|-----------------------|
| MCE-MIR-3032:rev  |                    |                            |                      | hsa-miR-142-3p      |                    |                       |
| MCE-MIR-3052:rev  | cand262            |                            |                      |                     |                    |                       |
| MCE-MIR-3092:rev  | cand698            |                            |                      |                     |                    |                       |
| MCE-MIR-3134:rev  |                    | mmu-mir-706<br>mmu-mir-709 | miRNA338<br>miRNA357 |                     |                    |                       |
| MCE-MIR-3239:rev  | cand572            |                            |                      |                     |                    |                       |
| MCE-MIR-329: fwd  | cand174            |                            |                      |                     |                    |                       |
| MCE-MIR-3382:rev  | cand779            |                            |                      |                     |                    |                       |
| MCE-MIR-3421: fwd | cand240            |                            |                      |                     |                    |                       |
| MCE-MIR-3421: rev | cand240            |                            |                      |                     |                    |                       |
| MCE-MIR-3477: rev | cand503            |                            |                      |                     |                    | EvoFold               |
| MCE-MIR-3489: fwd | cand275            |                            |                      |                     |                    |                       |
| MCE-MIR-3490: fwd | cand275            |                            |                      |                     |                    |                       |
| MCE-MIR-3530: rev | cand202            |                            |                      |                     |                    |                       |
| MCE-MIR-3532: rev | cand482            |                            |                      |                     |                    |                       |
| MCE-MIR-3607: fwd | cand686            |                            |                      |                     |                    |                       |
| MCE-MIR-3607: rev | cand744            |                            |                      |                     |                    |                       |
| MCE-MIR-3608: fwd | cand686            |                            |                      |                     |                    |                       |
| MCE-MIR-3608: rev | cand744            |                            |                      |                     |                    |                       |
| MCE-MIR-3774: fwd | cand830            |                            |                      |                     |                    |                       |
| MCE-MIR-3775: fwd | cand830            |                            |                      |                     |                    |                       |
| MCE-MIR-3824: rev | cand950            |                            |                      |                     |                    |                       |
| MCE-MIR-3830: rev | cand514            |                            |                      |                     |                    |                       |
| MCE-MIR-4065: fwd | cand379<br>cand685 |                            |                      |                     |                    |                       |
| MCE-MIR-406: fwd  | cand43             | mmu-mir-671                | miRNA307             |                     |                    |                       |
| MCE-MIR-4097: rev | cand465            |                            |                      |                     |                    |                       |
| MCE-MIR-4190: fwd | cand30             |                            |                      |                     |                    |                       |
| MCE-MIR-419: fwd  | cand17             |                            |                      |                     |                    |                       |
| MCE-MIR-4309: fwd | cand237            |                            |                      |                     |                    |                       |
| MCE-MIR-4342: fwd | cand572            |                            |                      |                     |                    | EvoFold               |
| MCE-MIR-4354: fwd | cand745            |                            |                      |                     |                    |                       |
| MCE-MIR-4357: fwd | cand379<br>cand685 |                            |                      |                     |                    |                       |
| MCE-MIR-4440: fwd | cand632            |                            |                      |                     |                    |                       |
| MCE-MIR-4471: fwd | cand572            |                            |                      |                     |                    |                       |
| MCE-MIR-4472: fwd | cand572            |                            |                      |                     |                    | EvoFold               |
| MCE-MIR-4533: fwd | cand703            |                            |                      |                     |                    |                       |
| MCE-MIR-4625: rev | cand145            |                            |                      |                     |                    |                       |

| MCE ID            | CELL <sup>5</sup>                                              | miRBase/piRNA                                                    | NAR <sup>19</sup>    | NATURE <sup>6</sup>          | PNAS <sup>17</sup> | EvoFold <sup>33</sup> |
|-------------------|----------------------------------------------------------------|------------------------------------------------------------------|----------------------|------------------------------|--------------------|-----------------------|
| MCE-MIR-4743: fwd | cand914                                                        |                                                                  |                      |                              |                    |                       |
| MCE-MIR-4746: rev | cand558                                                        |                                                                  |                      |                              |                    |                       |
| MCE-MIR-4772: fwd | cand686                                                        |                                                                  |                      |                              |                    |                       |
| MCE-MIR-4772: rev | cand744                                                        |                                                                  |                      |                              |                    |                       |
| MCE-MIR-4790: fwd | cand689                                                        |                                                                  |                      |                              |                    |                       |
| MCE-MIR-4791: fwd | cand592                                                        | mmu-mir-706<br>mmu-mir-709                                       | miRNA338<br>miRNA357 |                              |                    | EvoFold               |
| MCE-MIR-4822: rev | cand768                                                        |                                                                  |                      |                              |                    |                       |
| MCE-MIR-4856: fwd | cand760                                                        |                                                                  |                      |                              |                    |                       |
| MCE-MIR-4875: fwd | cand837                                                        |                                                                  |                      |                              |                    |                       |
| MCE-MIR-4881: fwd | cand191<br>cand282<br>cand36                                   |                                                                  |                      | hsa-miR-133a<br>hsa-miR-133b |                    |                       |
| MCE-MIR-4881: rev |                                                                | mmu-mir-133a<br>S-mmu-mir-133a<br>mmu-mir-133b<br>S-mmu-mir-133a | miRNA222             |                              | HSA-MIR-133A       |                       |
| MCE-MIR-4964: rev | cand433<br>cand435<br>cand436<br>cand575<br>cand577<br>cand766 |                                                                  |                      |                              |                    |                       |
| MCE-MIR-5042: rev | cand428                                                        |                                                                  |                      |                              |                    |                       |
| MCE-MIR-5062: rev | cand525                                                        |                                                                  |                      |                              |                    |                       |
| MCE-MIR-5127: rev | cand292                                                        |                                                                  |                      |                              |                    |                       |
| MCE-MIR-512: fwd  | cand793                                                        |                                                                  |                      |                              |                    |                       |
| MCE-MIR-5184: fwd | cand534                                                        |                                                                  |                      |                              |                    |                       |
| MCE-MIR-5366: rev | cand503                                                        |                                                                  |                      |                              |                    | EvoFold               |
| MCE-MIR-5376: fwd | cand576                                                        |                                                                  |                      |                              |                    |                       |
| MCE-MIR-5399: fwd | cand43                                                         | mmu-mir-671                                                      | miRNA307             |                              |                    |                       |
| MCE-MIR-5400: rev | cand418                                                        |                                                                  |                      |                              |                    |                       |
| MCE-MIR-5440: fwd | cand880                                                        |                                                                  |                      |                              |                    |                       |
| MCE-MIR-5503: fwd | cand576                                                        |                                                                  |                      |                              |                    |                       |
| MCE-MIR-5504: fwd | cand407                                                        |                                                                  |                      |                              |                    |                       |
| MCE-MIR-5504: rev | cand719                                                        |                                                                  |                      |                              |                    |                       |
| MCE-MIR-5524: fwd | cand341                                                        |                                                                  |                      |                              |                    |                       |
| MCE-MIR-5533: rev | cand437                                                        |                                                                  |                      |                              |                    |                       |

| MCE ID            | CELL <sup>5</sup>             | miRBase/piRNA              | NAR <sup>19</sup>    | NATURE <sup>6</sup> | PNAS <sup>17</sup> | EvoFold <sup>33</sup> |
|-------------------|-------------------------------|----------------------------|----------------------|---------------------|--------------------|-----------------------|
| MCE-MIR-5586: fwd | cand410<br>cand413<br>cand598 |                            |                      |                     |                    |                       |
| MCE-MIR-5616: rev | cand950                       |                            |                      |                     |                    |                       |
| MCE-MIR-5699: fwd | cand110                       |                            |                      |                     |                    | EvoFold               |
| MCE-MIR-5707: fwd | cand572                       |                            |                      |                     |                    |                       |
| MCE-MIR-5871: fwd | cand922                       |                            |                      |                     |                    |                       |
| MCE-MIR-5916: rev | cand503                       |                            |                      |                     |                    |                       |
| MCE-MIR-598: fwd  | cand576                       |                            |                      |                     |                    |                       |
| MCE-MIR-6000: fwd | cand407                       |                            |                      |                     |                    |                       |
| MCE-MIR-6000: rev | cand719                       |                            |                      |                     |                    |                       |
| MCE-MIR-6001: rev | cand713                       |                            |                      |                     |                    |                       |
| MCE-MIR-6015: rev | cand141                       |                            |                      |                     |                    |                       |
| MCE-MIR-6034: rev | cand967                       | mmu-mir-709                | miRNA357             |                     |                    |                       |
| MCE-MIR-6039: fwd | cand691<br>cand793            | mmu-mir-669b               | miRNA238             |                     |                    |                       |
| MCE-MIR-6039: rev |                               | mmu-mir-669b               | miRNA238             |                     |                    |                       |
| MCE-MIR-6129: rev | cand780                       |                            |                      |                     |                    |                       |
| MCE-MIR-6173: fwd | cand677                       |                            |                      |                     |                    |                       |
| MCE-MIR-6192: fwd | cand592                       | mmu-mir-706<br>mmu-mir-709 | miRNA338<br>miRNA357 |                     |                    |                       |
| MCE-MIR-624: rev  | cand43                        |                            |                      |                     |                    |                       |
| MCE-MIR-69: fwd   | cand614                       |                            |                      |                     |                    |                       |
| MCE-MIR-704: rev  | cand780                       |                            |                      |                     |                    |                       |
| MCE-MIR-72: fwd   | cand629                       |                            |                      |                     |                    |                       |
| MCE-MIR-745: rev  | cand428                       |                            |                      |                     |                    |                       |
| MCE-MIR-787: rev  | cand704                       | mmu-mir-297                |                      |                     |                    |                       |
| MCE-MIR-789: fwd  | cand341<br>cand581            |                            |                      |                     |                    |                       |
| MCE-MIR-789: rev  | cand581<br>cand793            |                            |                      |                     |                    |                       |
| MCE-MIR-965: rev  | cand677                       |                            |                      |                     |                    |                       |
| MCE-MIR-974: rev  | cand503                       |                            |                      |                     |                    |                       |
| MCE-MIR-990: rev  | cand950                       |                            |                      |                     |                    |                       |
| MCE-MIR-996: rev  | cand848                       |                            |                      |                     |                    |                       |
| MCE-MIR-2222: fwd |                               |                            |                      |                     |                    | EvoFold               |
| MCE-MIR-3147: fwd |                               |                            |                      |                     |                    | EvoFold               |
| MCE-MIR-1352: fwd |                               |                            |                      |                     |                    | EvoFold               |
| MCE-MIR-5384: rev |                               |                            |                      |                     |                    | EvoFold               |

| MCE ID           | CELL <sup>5</sup> | miRBase/piRNA | NAR <sup>19</sup> | NATURE <sup>6</sup> | PNAS <sup>17</sup> | EvoFold <sup>33</sup> |
|------------------|-------------------|---------------|-------------------|---------------------|--------------------|-----------------------|
| MCE-MIR-755:fwd  |                   |               |                   |                     |                    | EvoFold               |
| MCE-MIR-2679:fwd |                   |               |                   |                     |                    | EvoFold               |
| MCE-MIR-5088:rev |                   |               |                   |                     |                    | EvoFold               |
| MCE-MIR-5367:rev |                   |               |                   |                     |                    | EvoFold               |
| MCE-MIR-645:fwd  |                   |               |                   |                     |                    | EvoFold               |
| MCE-MIR-5192:rev |                   |               |                   |                     |                    | EvoFold               |
| MCE-MIR-3484:rev |                   |               |                   |                     |                    | EvoFold               |
| MCE-MIR-6054:rev |                   |               |                   |                     |                    | EvoFold               |
| MCE-MIR-5443:fwd |                   |               |                   |                     |                    | EvoFold               |
| MCE-MIR-4714:rev |                   |               |                   |                     |                    | EvoFold               |
| MCE-MIR-5068:rev |                   |               |                   |                     |                    | EvoFold               |
| MCE-MIR-5216:rev |                   |               |                   |                     |                    | EvoFold               |
| MCE-MIR-3541:rev |                   |               |                   |                     |                    | EvoFold               |
| MCE-MIR-5470:fwd |                   |               |                   |                     |                    | EvoFold               |
| MCE-MIR-3572:rev |                   |               |                   |                     |                    | EvoFold               |
| MCE-MIR-2345:fwd |                   |               |                   |                     |                    | EvoFold               |
| MCE-MIR-4010:rev |                   |               |                   |                     |                    | EvoFold               |
| MCE-MIR-482:rev  |                   |               |                   |                     |                    | EvoFold               |
| MCE-MIR-5704:rev |                   |               |                   |                     |                    | EvoFold               |
| MCE-MIR-4978:rev |                   |               |                   |                     |                    | EvoFold               |
| MCE-MIR-1264:rev |                   |               |                   |                     |                    | EvoFold               |
| MCE-MIR-2371:fwd |                   |               |                   |                     |                    | EvoFold               |
| MCE-MIR-1905:rev |                   |               |                   |                     |                    | EvoFold               |
| MCE-MIR-2371:rev |                   |               |                   |                     |                    | EvoFold               |
| MCE-MIR-3832:rev |                   |               |                   |                     |                    | EvoFold               |
| MCE-MIR-855:rev  |                   |               |                   |                     |                    | EvoFold               |
| MCE-MIR-871:rev  |                   |               |                   |                     |                    | EvoFold               |
| MCE-MIR-482:fwd  |                   |               |                   |                     |                    | EvoFold               |
| MCE-MIR-3619:rev |                   |               |                   |                     |                    | EvoFold               |
| MCE-MIR-3057:rev |                   |               |                   |                     |                    | EvoFold               |
| MCE-MIR-188:fwd  |                   |               |                   |                     |                    | EvoFold               |
| MCE-MIR-4303:fwd |                   |               |                   |                     |                    | EvoFold               |
| MCE-MIR-3637:rev |                   |               |                   |                     |                    | EvoFold               |
| MCE-MIR-5598:fwd |                   |               |                   |                     |                    | EvoFold               |
| MCE-MIR-2419:fwd |                   |               |                   |                     |                    | EvoFold               |
| MCE-MIR-2087:rev |                   |               |                   |                     |                    | EvoFold               |
| MCE-MIR-5418:fwd |                   |               |                   |                     |                    | EvoFold               |
| MCE-MIR-5004:rev |                   |               |                   |                     |                    | EvoFold               |
| MCE-MIR-1066:rev |                   |               |                   |                     |                    | EvoFold               |

| MCE ID           | CELL <sup>5</sup> | miRBase/piRNA | NAR <sup>19</sup> | NATURE <sup>6</sup> | PNAS <sup>17</sup> | EvoFold <sup>33</sup> |
|------------------|-------------------|---------------|-------------------|---------------------|--------------------|-----------------------|
| MCE-MIR-3886.fwd |                   |               |                   |                     |                    | EvoFold               |
| MCE-MIR-5454.rev |                   |               |                   |                     |                    | EvoFold               |
| MCE-MIR-4763.fwd |                   |               |                   |                     |                    | EvoFold               |
| MCE-MIR-5295.rev |                   |               |                   |                     |                    | EvoFold               |
| MCE-MIR-1756.rev |                   |               |                   |                     |                    | EvoFold               |
| MCE-MIR-3261.fwd |                   |               |                   |                     |                    | EvoFold               |
| MCE-MIR-4714.fwd |                   |               |                   |                     |                    | EvoFold               |
| MCE-MIR-2111.fwd |                   |               |                   |                     |                    | EvoFold               |
| MCE-MIR-3444.rev |                   |               |                   |                     |                    | EvoFold               |
| MCE-MIR-5597.fwd |                   |               |                   |                     |                    | EvoFold               |
| MCE-MIR-4799.rev |                   |               |                   |                     |                    | EvoFold               |
| MCE-MIR-2661.rev |                   |               |                   |                     |                    | EvoFold               |
| MCE-MIR-5406.rev |                   |               |                   |                     |                    | EvoFold               |
| MCE-MIR-4497.rev |                   |               |                   |                     |                    | EvoFold               |
| MCE-MIR-2364.rev |                   |               |                   |                     |                    | EvoFold               |
| MCE-MIR-3646.rev |                   |               |                   |                     |                    | EvoFold               |
| MCE-MIR-3888.rev |                   |               |                   |                     |                    | EvoFold               |
| MCE-MIR-3886.rev |                   |               |                   |                     |                    | EvoFold               |
| MCE-MIR-3113.fwd |                   |               |                   |                     |                    | EvoFold               |
| MCE-MIR-4932.rev |                   |               |                   |                     |                    | EvoFold               |
| MCE-MIR-2722.rev |                   |               |                   |                     |                    | EvoFold               |
| MCE-MIR-871.fwd  |                   |               |                   |                     |                    | EvoFold               |
| MCE-MIR-4069.rev |                   |               |                   |                     |                    | EvoFold               |
| MCE-MIR-4762.fwd |                   |               |                   |                     |                    | EvoFold               |
| MCE-MIR-4830.fwd |                   |               |                   |                     |                    | EvoFold               |
| MCE-MIR-5396.rev |                   |               |                   |                     |                    | EvoFold               |
| MCE-MIR-4280.rev |                   |               |                   |                     |                    | EvoFold               |
| MCE-MIR-4614.rev |                   |               |                   |                     |                    | EvoFold               |
| MCE-MIR-3522.rev |                   |               |                   |                     |                    | EvoFold               |
| MCE-MIR-4832.rev |                   |               |                   |                     |                    | EvoFold               |
| MCE-MIR-4280.fwd |                   |               |                   |                     |                    | EvoFold               |
| MCE-MIR-4667.fwd |                   |               |                   |                     |                    | EvoFold               |
| MCE-MIR-2192.rev |                   |               |                   |                     |                    | EvoFold               |
| MCE-MIR-3057.fwd |                   |               |                   |                     |                    | EvoFold               |
| MCE-MIR-855.fwd  |                   |               |                   |                     |                    | EvoFold               |
| MCE-MIR-5620.fwd | hsa-pir-018165    |               |                   |                     |                    |                       |
| MCE-MIR-5503.fwd | hsa-pir-010095    |               |                   |                     |                    |                       |
| MCE-MIR-5389.fwd | rno-pir-008639    |               |                   |                     |                    |                       |

| MCE ID            | CELL <sup>5</sup> | miRBase/piRNA | NAR <sup>19</sup> | NATURE <sup>6</sup> | PNAS <sup>17</sup> | EvoFold <sup>33</sup> |
|-------------------|-------------------|---------------|-------------------|---------------------|--------------------|-----------------------|
| MCE-MIR-4342: fwd | mmu-pir-009238    |               |                   |                     |                    |                       |
| MCE-MIR-3859: fwd | rno-pir-008639    |               |                   |                     |                    |                       |
| MCE-MIR-399: fwd  | hsa-pir-014740    |               |                   |                     |                    |                       |
| MCE-MIR-2563: fwd | hsa-pir-009294    |               |                   |                     |                    |                       |
| MCE-MIR-3513: fwd | hsa-pir-019675    |               |                   |                     |                    |                       |
| MCE-MIR-4472: fwd | mmu-pir-009238    |               |                   |                     |                    |                       |
| MCE-MIR-2339: fwd | hsa-pir-013215    |               |                   |                     |                    |                       |
