# Supplementary material for: Novel MicroRNA Candidates and miRNA-mRNA Pairs in Embryonic Stem (ES) Cells
Source: PubMed Central journal article supplement (PMC2481296; doi:10.1371/journal.pone.0002548), 2008-07-02
Supplement: pone.0002548.s011.pdf [file pone.0002548.s011.pdf]

**Supplemental Table ST4A: Mouse Array Version 2 data-Adult Mouse Panel (Adult Pool).** This table contains the simple detectable values, which lists average signal values of all transcripts on the array, of the ES-GCNF -/- time series. Each array includes 545 MCE-MIR, 266 mmu-mir, 170 Cand, 46 MIR, and 177 S-mmu-mir. A total of 10 arrays were used in this study. This table represents results obtained with the <200 nt RNA probe from the Adult Pool which consist of 18 different fully differentiated tissues from adult mouse.

| Array Chip ID: | 204    | 216    | 246    |
|----------------|--------|--------|--------|
| mmu-mir-451    | 53,536 | 65,444 | 34,574 |
| mmu-mir-16     | 43,963 | 37,723 | 24,651 |
| mmu-mir-26a    | 43,284 | 41,197 | 30,504 |
| mmu-mir-30c    | 30,195 | 36,641 | 17,524 |
| mmu-mir-126-3p | 29,582 | 39,036 | 22,019 |
| mmu-let-7a     | 28,945 | 36,734 | 19,719 |
| cand284:a      | 28,165 | 28,120 | 15,341 |
| mmu-mir-23b    | 26,716 | 27,250 | 15,221 |
| mmu-mir-30b    | 26,490 | 32,828 | 16,753 |
| mmu-mir-29a    | 26,385 | 33,926 | 18,924 |
| mmu-mir-21     | 26,329 | 25,738 | 18,222 |
| cand709        | 25,290 | 28,322 | 15,642 |
| mmu-let-7c     | 25,254 | 30,546 | 21,025 |
| mmu-mir-1      | 25,147 | 37,031 | 20,413 |
| mmu-mir-122a   | 24,986 | 34,378 | 20,649 |
| mmu-let-7f     | 24,929 | 33,280 | 19,096 |
| mmu-mir-23a    | 24,798 | 25,730 | 14,076 |
| cand137:a      | 24,537 | 25,268 | 13,828 |
| cand118        | 24,034 | 26,618 | 17,234 |
| cand374:a      | 23,744 | 29,516 | 17,558 |
| mmu-let-7d     | 23,424 | 31,439 | 16,245 |
| cand490        | 23,317 | 28,343 | 13,686 |
| cand161        | 22,915 | 25,754 | 14,829 |
| mmu-mir-26b    | 22,731 | 21,976 | 18,076 |
| MIR85          | 22,039 | 25,124 | 13,242 |
| mmu-let-7g     | 22,022 | 31,421 | 16,476 |
| mmu-mir-181a   | 21,723 | 25,242 | 14,409 |
| mmu-mir-125b   | 20,961 | 30,150 | 14,493 |
| cand106:a      | 20,872 | 26,003 | 13,255 |
| cand90:a       | 20,739 | 22,938 | 12,684 |
| cand119        | 20,696 | 24,848 | 14,602 |

| Array Chip ID:    | 204    | 216    | 246    |
|-------------------|--------|--------|--------|
| mmu-mir-30a-5p    | 20,344 | 25,845 | 12,362 |
| cand314           | 20,184 | 22,536 | 10,444 |
| mmu-mir-24        | 19,872 | 19,769 | 14,087 |
| cand348           | 19,649 | 26,135 | 11,533 |
| mmu-let-7b        | 19,634 | 25,954 | 16,204 |
| mmu-mir-145       | 18,889 | 25,813 | 8,644  |
| cand297:b         | 18,073 | 23,557 | 10,706 |
| mmu-let-7i        | 17,922 | 24,945 | 15,138 |
| MCE-MIR_4453: fwd | 17,610 | 13,048 | 9,300  |
| cand497:a         | 17,152 | 25,460 | 7,903  |
| mmu-mir-29b       | 17,127 | 25,043 | 9,157  |
| mmu-mir-143       | 17,027 | 22,380 | 10,383 |
| cand614           | 16,862 | 25,149 | 13,121 |
| mmu-mir-22        | 16,368 | 19,771 | 10,580 |
| mmu-mir-30d       | 15,934 | 22,657 | 8,539  |
| S-mmu-mir-199a    | 15,817 | 22,077 | 13,572 |
| mmu-mir-27b       | 14,855 | 17,624 | 9,069  |
| cand252           | 14,722 | 15,477 | 7,781  |
| cand103:b         | 14,615 | 20,159 | 5,377  |
| mmu-mir-15a       | 14,429 | 17,420 | 9,022  |
| mmu-mir-27a       | 13,955 | 17,428 | 7,515  |
| mmu-mir-124a      | 13,772 | 19,760 | 8,607  |
| mmu-mir-17-5p     | 13,279 | 13,142 | 8,345  |
| mmu-mir-191       | 13,271 | 16,148 | 9,354  |
| mmu-let-7e        | 13,208 | 18,864 | 7,126  |
| cand157           | 13,196 | 20,505 | 7,894  |
| mmu-mir-133b      | 13,191 | 21,771 | 3,742  |
| mmu-mir-30e       | 12,784 | 18,256 | 8,091  |
| mmu-mir-125a      | 12,523 | 17,081 | 8,760  |
| mmu-mir-195       | 12,467 | 18,195 | 10,784 |
| cand375           | 12,423 | 17,836 | 8,475  |
| mmu-mir-103       | 12,414 | 14,579 | 6,367  |
| mmu-mir-99a       | 12,387 | 16,984 | 8,334  |
| mmu-mir-128a      | 12,308 | 18,579 | 8,068  |
| mmu-mir-19b       | 11,860 | 12,866 | 5,964  |
| MIR35             | 11,845 | 16,853 | 8,042  |
| mmu-mir-15b       | 11,626 | 13,901 | 7,164  |
| mmu-mir-20a       | 11,437 | 11,968 | 8,764  |
| mmu-mir-130a      | 11,363 | 11,735 | 7,412  |

| Array Chip ID:    | 204    | 216    | 246    |
|-------------------|--------|--------|--------|
| mmu-mir-133a      | 11,092 | 19,624 | 3,757  |
| mmu-mir-25        | 10,967 | 11,445 | 7,003  |
| cand104:a         | 10,840 | 15,713 | 5,263  |
| mmu-mir-148a      | 10,734 | 13,171 | 7,371  |
| mmu-mir-107       | 10,438 | 13,485 | 5,166  |
| mmu-mir-29c       | 10,398 | 17,888 | 5,000  |
| cand1:b           | 10,347 | 17,192 | 5,026  |
| mmu-mir-181b      | 10,177 | 14,169 | 8,670  |
| cand706           | 10,057 | 10,015 | 6,341  |
| mmu-mir-128b      | 9,945  | 17,096 | 6,148  |
| cand304           | 9,632  | 14,292 | 4,877  |
| cand341           | 9,423  | 10,780 | 2,819  |
| mmu-mir-146       | 9,300  | 12,862 | 10,077 |
| mmu-mir-20b       | 9,293  | 11,311 | 5,998  |
| MCE-MIR_4274: fwd | 9,043  | 8,385  | 4,496  |
| MIR216            | 8,641  | 10,575 | 4,480  |
| mmu-mir-221       | 8,583  | 11,583 | 7,688  |
| MCE-MIR_3626: rev | 8,504  | 7,348  | 4,336  |
| mmu-mir-424       | 8,440  | 14,995 | 7,490  |
| mmu-mir-200a      | 8,303  | 12,069 | 6,132  |
| cand79            | 7,957  | 10,951 | 3,465  |
| cand497:b         | 7,842  | 16,597 | 3,072  |
| mmu-mir-100       | 7,805  | 14,910 | 4,670  |
| mmu-mir-98        | 7,744  | 16,636 | 4,130  |
| S-mmu-mir-140     | 7,621  | 8,709  | 4,913  |
| mmu-mir-106b      | 7,549  | 9,548  | 4,740  |
| mmu-mir-9         | 7,508  | 19,486 | 6,039  |
| mmu-mir-106a      | 7,158  | 10,282 | 3,539  |
| MCE-MIR_5060: rev | 7,106  | 6,463  | 6,238  |
| mmu-mir-194       | 7,066  | 12,743 | 5,542  |
| mmu-mir-127       | 7,023  | 9,330  | 5,424  |
| S-mmu-mir-9       | 7,015  | 10,717 | 5,363  |
| mmu-mir-199a      | 6,948  | 12,914 | 3,772  |
| MIR74             | 6,933  | 10,203 | 6,160  |
| mmu-mir-101a      | 6,904  | 11,697 | 3,297  |
| MCE-MIR_1597: fwd | 6,854  | 6,329  | 4,809  |
| mmu-mir-93        | 6,813  | 8,274  | 4,288  |
| mmu-mir-200b      | 6,581  | 9,359  | 5,064  |
| mmu-mir-99b       | 6,392  | 8,986  | 4,316  |

| Array Chip ID:    | 204   | 216    | 246   |
|-------------------|-------|--------|-------|
| MCE-MIR_3820:rev  | 6,333 | 6,595  | 4,749 |
| MIR121            | 6,157 | 10,303 | 4,795 |
| mmu-mir-422b      | 6,150 | 10,418 | 4,126 |
| cand151           | 6,123 | 6,525  | 4,579 |
| cand516           | 6,102 | 6,271  | 4,465 |
| cand337           | 6,020 | 8,805  | 3,358 |
| MCE-MIR_2563:rev  | 5,664 | 8,713  | 3,452 |
| mmu-mir-34c       | 5,437 | 9,147  | 3,376 |
| mmu-mir-199b      | 5,326 | 11,458 | 1,939 |
| mmu-mir-150       | 5,283 | 10,873 | 2,598 |
| cand278:a         | 5,278 | 8,056  | 4,447 |
| cand135:b         | 5,278 | 6,529  | 2,234 |
| mmu-mir-101b      | 5,099 | 8,663  | 2,919 |
| mmu-mir-222       | 5,048 | 7,880  | 3,969 |
| MCE-MIR_1394:rev  | 4,815 | 4,935  | 2,361 |
| mmu-mir-218       | 4,732 | 8,436  | 4,643 |
| MCE-MIR_3468:rev  | 4,680 | 5,259  | 4,344 |
| mmu-mir-152       | 4,670 | 7,011  | 4,414 |
| MCE-MIR_2953: fwd | 4,646 | 6,185  | 1,682 |
| MIR136            | 4,574 | 7,700  | 2,512 |
| cand315:b         | 4,507 | 5,703  | 2,879 |
| cand268:b         | 4,470 | 6,057  | 1,960 |
| mmu-mir-181c      | 4,413 | 11,052 | 1,226 |
| MIR12             | 4,292 | 7,382  | 3,912 |
| cand336           | 4,272 | 6,930  | 2,164 |
| MCE-MIR_1773: fwd | 4,261 | 4,402  | 2,817 |
| MCE-MIR_4226: fwd | 4,251 | 6,021  | 847   |
| cand564:b         | 4,184 | 6,158  | 1,880 |
| cand385           | 4,101 | 3,741  | 3,690 |
| MCE-MIR_3571:rev  | 4,036 | 3,789  | 3,783 |
| mmu-mir-92        | 4,013 | 6,720  | 2,628 |
| mmu-mir-10a       | 3,869 | 8,614  | 3,694 |
| MIR75             | 3,808 | 5,648  | 2,038 |
| mmu-mir-34a       | 3,781 | 5,501  | 1,849 |
| mmu-mir-192       | 3,753 | 9,864  | 2,797 |
| mmu-mir-200c      | 3,717 | 5,821  | 2,994 |
| mmu-mir-10b       | 3,710 | 9,549  | 3,219 |
| cand262           | 3,657 | 6,203  | 2,438 |
| mmu-mir-429       | 3,624 | 5,787  | 3,895 |

| Array Chip ID:    | 204   | 216   | 246   |
|-------------------|-------|-------|-------|
| cand144:a         | 3,605 | 5,794 | 1,222 |
| mmu-mir-206       | 3,583 | 5,224 | 3,761 |
| mmu-mir-185       | 3,580 | 6,010 | 2,493 |
| mmu-mir-214       | 3,531 | 5,375 | 2,353 |
| cand350           | 3,526 | 5,077 | 2,668 |
| MIR77             | 3,455 | 8,851 | 2,292 |
| MCE-MIR_3191:rev  | 3,414 | 4,731 | 3,068 |
| mmu-mir-34b       | 3,268 | 6,781 | 1,709 |
| mmu-mir-361       | 3,258 | 4,728 | 2,610 |
| MCE-MIR_4087: fwd | 3,211 | 4,390 | 1,614 |
| MCE-MIR_1539:rev  | 3,191 | 4,299 | 1,972 |
| cand306           | 3,147 | 3,623 | 3,373 |
| mmu-mir-19a       | 3,132 | 6,022 | 1,387 |
| cand90:b          | 3,103 | 7,040 | 1,536 |
| MIR4              | 3,089 | 5,588 | 1,552 |
| cand342:a         | 3,071 | 6,142 | 1,577 |
| MCE-MIR_2171:rev  | 3,011 | 2,094 | 3,650 |
| MCE-MIR_3502:rev  | 3,002 | 3,474 | 1,987 |
| mmu-mir-203       | 2,969 | 5,658 | 3,504 |
| MCE-MIR_3190:rev  | 2,962 | 4,347 | 1,972 |
| cand172:b         | 2,960 | 6,002 | 2,006 |
| mmu-mir-342       | 2,893 | 5,292 | 2,385 |
| mmu-mir-376b      | 2,844 | 4,221 | 2,227 |
| cand68            | 2,756 | 2,268 | 3,547 |
| mmu-mir-129-3p    | 2,752 | 6,943 | 1,201 |
| mmu-mir-130b      | 2,654 | 3,825 | 1,973 |
| MCE-MIR_3495:rev  | 2,647 | 2,195 | 3,692 |
| mmu-mir-335       | 2,646 | 5,405 | 2,584 |
| cand324:a         | 2,623 | 4,126 | 1,290 |
| cand349:a         | 2,599 | 9,534 | 1,086 |
| mmu-mir-341       | 2,510 | 2,032 | 2,127 |
| mmu-mir-320       | 2,509 | 3,220 | 1,656 |
| MIR43             | 2,347 | 6,402 | 1,273 |
| mmu-mir-155       | 2,334 | 3,308 | 3,531 |
| cand317           | 2,329 | 3,160 | 1,543 |
| cand276:a         | 2,215 | 3,628 | 934   |
| mmu-mir-223       | 2,156 | 7,445 | 1,543 |
| mmu-mir-351       | 2,155 | 4,152 | 1,294 |
| mmu-mir-486       | 2,118 | 5,001 | 1,582 |

| <b>Array Chip ID:</b> | <b>204</b> | <b>216</b> | <b>246</b> |
|-----------------------|------------|------------|------------|
| cand97                | 2,116      | 4,674      | 919        |
| cand500:a             | 2,104      | 3,967      | 936        |
| MCE-MIR_1457:rev      | 2,098      | 3,383      | 851        |
| MCE-MIR_5195:rev      | 2,084      | 2,443      | 1,408      |
| MCE-MIR_5699: fwd     | 1,915      | 2,657      | 178        |
| MCE-MIR_3782:rev      | 1,886      | 1,975      | 2,586      |
| mmu-mir-434-3p        | 1,844      | 3,911      | 1,947      |
| mmu-mir-350           | 1,828      | 4,178      | 1,009      |
| mmu-mir-138           | 1,799      | 4,481      | 800        |
| MCE-MIR_4297: fwd     | 1,785      | 2,757      | 684        |
| MCE-MIR_3111: fwd     | 1,776      | 2,112      | 988        |
| mmu-mir-31            | 1,748      | 2,982      | 1,411      |
| MCE-MIR_1535:rev      | 1,705      | 1,737      | 2,150      |
| mmu-mir-142-5p        | 1,670      | 5,106      | 475        |
| mmu-mir-379           | 1,618      | 2,837      | 1,971      |
| mmu-mir-7             | 1,587      | 3,140      | 1,353      |
| MCE-MIR_5367:rev      | 1,540      | 1,761      | 1,918      |
| mmu-mir-449           | 1,529      | 3,540      | 1,128      |
| MIR41                 | 1,525      | 3,278      | 1,217      |
| MCE-MIR_1538: fwd     | 1,472      | 2,254      | 827        |
| mmu-mir-142-3p        | 1,468      | 10,982     | 509        |
| cand594               | 1,451      | 1,290      | 1,580      |
| cand595:b             | 1,431      | 2,085      | 619        |
| MCE-MIR_254: fwd      | 1,425      | 1,974      | 709        |
| cand135:a             | 1,372      | 2,719      | 1,029      |
| mmu-mir-541           | 1,328      | 2,255      | 966        |
| mmu-mir-382           | 1,321      | 2,672      | 1,662      |
| cand667:a             | 1,317      | 2,379      | 647        |
| mmu-mir-205           | 1,310      | 3,023      | 672        |
| mmu-mir-204           | 1,310      | 4,255      | 850        |
| MIR124                | 1,308      | 2,572      | 1,420      |
| cand153:a             | 1,286      | 3,994      | 612        |
| MCE-MIR_5109:rev      | 1,270      | 1,465      | 895        |
| mmu-mir-301           | 1,268      | 2,537      | 1,076      |
| cand186               | 1,264      | 1,257      | 909        |
| mmu-mir-28            | 1,263      | 2,851      | 580        |
| MCE-MIR_3595: fwd     | 1,262      | 1,806      | 1,031      |
| cand271               | 1,258      | 1,645      | 847        |
| MCE-MIR_2222: fwd     | 1,254      | 1,453      | 431        |

| Array Chip ID:   | 204   | 216   | 246   |
|------------------|-------|-------|-------|
| cand78:b         | 1,250 | 1,274 | 1,601 |
| mmu-mir-149      | 1,217 | 3,117 | 670   |
| mmu-mir-324-5p   | 1,216 | 2,106 | 740   |
| MCE-MIR_3543:rev | 1,199 | 3,800 | 217   |
| mmu-mir-18       | 1,176 | 2,082 | 681   |
| mmu-mir-322      | 1,161 | 3,019 | 1,191 |
| cand1:a          | 1,155 | 2,712 | 717   |
| cand294          | 1,148 | 1,965 | 1,086 |
| mmu-mir-186      | 1,146 | 2,579 | 955   |
| MCE-MIR_2164:rev | 1,145 | 1,746 | 1,037 |
| MCE-MIR_984:rev  | 1,113 | 1,273 | 994   |
| mmu-mir-30a-3p   | 1,112 | 2,966 | 749   |
| MIR30            | 1,092 | 3,556 | 384   |
| MIR257           | 1,081 | 3,180 | 703   |
| cand692:b        | 1,028 | 776   | 1,201 |
| MCE-MIR_3147:fwd | 1,025 | 1,281 | 1,369 |
| mmu-mir-137      | 1,014 | 3,824 | 1,488 |
| cand371:a        | 1,004 | 1,537 | 1,651 |
| MCE-MIR_4822:rev | 998   | 1,197 | 629   |
| mmu-mir-487b     | 992   | 2,071 | 788   |
| MCE-MIR_4673:fwd | 986   | 1,632 | 483   |
| MCE-MIR_3847:fwd | 980   | 1,567 | 298   |
| cand231          | 955   | 1,199 | 1,393 |
| MCE-MIR_2388:rev | 945   | 1,768 | 450   |
| mmu-mir-329      | 930   | 1,992 | 766   |
| MCE-MIR_5062:rev | 925   | 1,016 | 1,677 |
| MCE-MIR_5005:rev | 923   | 1,382 | 706   |
| MCE-MIR_4861:fwd | 917   | 2,060 | 220   |
| mmu-mir-148b     | 896   | 2,302 | 778   |
| MCE-MIR_5389:fwd | 873   | 1,392 | 236   |
| cand489          | 822   | 1,024 | 1,603 |
| mmu-mir-450      | 821   | 2,996 | 639   |
| cand572:b        | 811   | 1,689 | 701   |
| MCE-MIR_4661:fwd | 800   | 2,108 | 95    |
| cand152:b        | 795   | 2,257 | 397   |
| MCE-MIR_6054:rev | 792   | 729   | 582   |
| MCE-MIR_136:fwd  | 789   | 1,387 | 284   |
| MCE-MIR_1506:rev | 787   | 1,168 | 658   |
| MCE-MIR_1038:fwd | 765   | 1,183 | 1,423 |

| Array Chip ID:    | 204 | 216   | 246   |
|-------------------|-----|-------|-------|
| mmu-mir-132       | 762 | 3,328 | 749   |
| MIR112            | 744 | 901   | 972   |
| MCE-MIR_3155: fwd | 735 | 1,095 | 404   |
| MCE-MIR_968: fwd  | 728 | 1,380 | 435   |
| cand718: b        | 724 | 1,034 | 464   |
| mmu-mir-503       | 722 | 1,865 | 397   |
| cand255           | 720 | 855   | 385   |
| MIR207            | 716 | 1,235 | 542   |
| mmu-mir-187       | 709 | 1,896 | 634   |
| cand647           | 702 | 1,083 | 645   |
| MCE-MIR_5544: rev | 692 | 1,935 |       |
| MCE-MIR_2563: fwd | 679 | 1,245 | 319   |
| MCE-MIR_810: rev  | 678 | 1,763 | 300   |
| MIR88             | 667 | 1,348 | 868   |
| mmu-mir-139       | 663 | 2,440 | 518   |
| cand371: b        | 661 | 1,237 | 469   |
| mmu-mir-337       | 652 | 1,338 | 613   |
| mmu-mir-141       | 646 | 1,757 | 705   |
| MCE-MIR_5374: fwd | 639 | 2,105 | 310   |
| MCE-MIR_4462: fwd | 636 | 720   | 1,074 |
| mmu-mir-470       | 635 | 1,282 | 534   |
| mmu-mir-433-3p    | 632 | 1,452 | 518   |
| mmu-mir-338       | 627 | 2,630 | 792   |
| MCE-MIR_1504: rev | 615 | 970   | 561   |
| MCE-MIR_3470: rev | 611 | 878   | 1,045 |
| MCE-MIR_4625: fwd | 611 | 1,208 | 373   |
| MCE-MIR_995: rev  | 600 | 861   | 463   |
| MIR253            | 592 | 1,348 | 230   |
| mmu-mir-154       | 584 | 1,499 | 418   |
| MCE-MIR_1190: fwd | 581 | 1,296 | 343   |
| mmu-mir-140       | 580 | 1,628 | 592   |
| MCE-MIR_645: fwd  | 575 | 1,406 | 220   |
| mmu-mir-345       | 572 | 1,384 | 282   |
| mmu-mir-210       | 566 | 1,014 | 401   |
| MCE-MIR_3859: fwd | 561 | 1,148 | 164   |
| MCE-MIR_3491: rev | 556 | 831   | 656   |
| MCE-MIR_3334: fwd | 547 | 1,092 | 225   |
| MCE-MIR_5014: fwd | 542 | 540   | 460   |
| mmu-mir-17-3p     | 534 | 1,025 | 311   |



| Array Chip ID:   | 204 | 216   | 246   |
|------------------|-----|-------|-------|
| cand146          | 518 | 2,118 | 266   |
| MCE-MIR_321:rev  | 516 | 1,245 | 170   |
| MIR165           | 510 | 679   | 1,337 |
| mmu-mir-410      | 499 | 1,354 | 662   |
| mmu-mir-324-3p   | 475 | 986   | 349   |
| MIR141           | 475 | 1,545 | 280   |
| mmu-mir-144      | 474 | 3,130 | 460   |
| mmu-mir-494      | 474 | 2,139 | 293   |
| cand572:a        | 473 | 1,042 | 374   |
| mmu-mir-381      | 469 | 1,310 | 411   |
| MCE-MIR_1778:fwd | 468 | 846   | 344   |
| mmu-mir-202      | 462 | 995   | 730   |
| MIR202           | 462 | 1,139 | 369   |
| mmu-mir-182      | 457 | 997   | 470   |
| cand523          | 445 | 1,639 | 45    |
| cand137:b        | 443 | 1,759 | 43    |
| MCE-MIR_335:fwd  | 439 | 553   | 491   |
| mmu-mir-383      | 438 | 995   | 715   |
| mmu-mir-344      | 432 | 1,053 | 465   |
| MCE-MIR_5172:fwd | 432 | 1,084 | 4,442 |
| cand613          | 429 | 776   | 884   |
| MCE-MIR_3686:fwd | 425 | 555   | 794   |
| MIR102           | 425 | 1,027 | 215   |
| MCE-MIR_2139:fwd | 423 | 679   | 814   |
| mmu-mir-300      | 419 | 1,175 | 272   |
| cand362          | 412 | 827   | 131   |
| mmu-mir-134      | 412 | 684   | 532   |
| MCE-MIR_2243:fwd | 409 | 746   | 865   |
| MCE-MIR_3573:rev | 400 | 60    | 627   |
| cand11:b         | 398 | 509   | 553   |
| MCE-MIR_3134:rev | 396 | 1,731 | 63    |
| cand26           | 394 | 717   | 555   |
| MCE-MIR_3485:rev | 392 | 754   | 401   |
| mmu-mir-484      | 386 | 1,228 | 242   |
| cand212          | 384 | 1,162 | 263   |
| MCE-MIR_5291:fwd | 379 | 1,034 | 45    |
| MIR61            | 377 | 1,186 | 124   |
| mmu-mir-543      | 374 | 1,077 | 427   |
| MCE-MIR_3513:rev | 374 | 641   | 190   |

| Array Chip ID:   | 204 | 216   | 246 |
|------------------|-----|-------|-----|
| mmu-mir-434-5p   | 373 | 1,279 | 397 |
| mmu-mir-431      | 368 | 975   | 285 |
| MCE-MIR_3685:rev | 363 | 480   | 444 |
| mmu-mir-290      | 362 | 502   | 106 |
| mmu-mir-212      | 360 | 969   | 359 |
| cand425          | 359 | 636   | 243 |
| MCE-MIR_5399:fwd | 342 | 580   | 346 |
| MCE-MIR_4913:rev | 329 | 1,587 | 43  |
| MCE-MIR_4740:fwd | 319 | 569   | 213 |
| MCE-MIR_1409:fwd | 316 | 371   | 441 |
| MCE-MIR_2745:fwd | 315 | 349   | 32  |
| mmu-mir-183      | 313 | 678   | 308 |
| cand284:b        | 309 | 1,161 | 94  |
| mmu-mir-213      | 307 | 876   | 303 |
| MCE-MIR_783:rev  | 305 | 618   | 86  |
| MCE-MIR_3484:rev | 302 | 355   | 831 |
| MCE-MIR_2698:rev | 299 | 307   | 809 |
| MCE-MIR_2169:rev | 296 | 778   | 219 |
| MCE-MIR_5079:rev | 292 | 528   | 460 |
| MCE-MIR_4030:rev | 291 | 681   | 165 |
| mmu-mir-376a     | 289 | 877   | 371 |
| cand617          | 287 | 542   | 108 |
| mmu-mir-298      | 286 | 736   | 122 |
| MCE-MIR_822:fwd  | 283 | 718   | 67  |
| MCE-MIR_2310:rev | 282 | 663   | 43  |
| MCE-MIR_5089:fwd | 279 | 736   | 154 |
| MCE-MIR_3642:rev | 276 | 560   | 136 |
| mmu-mir-409      | 272 | 831   | 182 |
| MCE-MIR_3751:fwd | 264 | 714   | 131 |
| MCE-MIR_3837:rev | 263 | 711   | 48  |
| MCE-MIR_5192:rev | 260 | 545   | 364 |
| mmu-mir-153      | 260 | 1,032 | 634 |
| MCE-MIR_3143:fwd | 259 | 464   | 140 |
| MCE-MIR_755:fwd  | 251 | 247   | 776 |
| MCE-MIR_3416:rev | 248 | 468   | 739 |
| cand22           | 246 | 1,110 | 302 |
| cand708:b        | 244 | 517   | 47  |
| MCE-MIR_3529:rev | 242 | 1,388 | 268 |
| MCE-MIR_4854:rev | 242 | 727   | 44  |

| <b>Array Chip ID:</b> | <b>204</b> | <b>216</b> | <b>246</b> |
|-----------------------|------------|------------|------------|
| MCE-MIR_1325:rev      | 240        | 416        | 354        |
| MCE-MIR_5030:rev      | 238        | 818        | 49         |
| mmu-mir-378           | 233        | 744        | 196        |
| mmu-mir-365           | 232        | 1,601      | 247        |
| MCE-MIR_5606:fwd      | 231        | 569        | 156        |
| cand210:a             | 230        | 745        | 90         |
| MCE-MIR_4273:fwd      | 229        | 400        | 469        |
| MCE-MIR_135:fwd       | 227        | 341        | 86         |
| cand315:a             | 225        | 507        | 179        |
| cand116               | 223        | 507        | 219        |
| cand178:a             | 223        | 424        | 133        |
| MCE-MIR_2470:fwd      | 223        | 241        | 105        |
| MCE-MIR_1365:fwd      | 221        | 194        | 974        |
| MCE-MIR_4743:fwd      | 215        | 585        | 30         |
| MCE-MIR_2337:fwd      | 213        | 430        | 41         |
| mmu-mir-362           | 208        | 496        | 161        |
| mmu-mir-126-5p        | 207        | 8,764      | 535        |
| MCE-MIR_5057:fwd      | 207        | 505        | 40         |
| MCE-MIR_3503:rev      | 198        | 298        | 345        |
| cand268:a             | 198        | 381        | 1,220      |
| MCE-MIR_2817:fwd      | 198        | 290        | 447        |
| MCE-MIR_3295:rev      | 197        | 233        | 344        |
| MCE-MIR_1734:fwd      | 196        | 538        | 70         |
| mmu-mir-328           | 195        | 685        | 99         |
| mmu-mir-363           | 193        | 600        | 180        |
| mmu-mir-375           | 193        | 816        | 267        |
| MCE-MIR_5403:fwd      | 191        | 518        | 46         |
| MCE-MIR_3488:rev      | 191        | 310        | 458        |
| cand13                | 190        | 474        | 190        |
| MCE-MIR_4999:rev      | 189        | 211        | 529        |
| mmu-mir-151           | 188        | 415        | 209        |
| mmu-mir-330           | 178        | 391        | 150        |
| cand564:a             | 178        | 352        | 157        |
| MIR167                | 176        | 606        | 103        |
| MCE-MIR_4820:rev      | 171        | 238        | 288        |
| cand345               | 170        | 310        | 86         |
| mmu-mir-331           | 168        | 554        | 79         |
| MCE-MIR_4821:rev      | 165        | 234        | 214        |
| MCE-MIR_4945:fwd      | 160        | 241        | 481        |

| Array Chip ID:   | 204 | 216   | 246 |
|------------------|-----|-------|-----|
| MCE-MIR_2327:fwd | 159 | 204   | 125 |
| cand50           | 158 | 528   | 211 |
| mmu-mir-346      | 155 | 324   | 131 |
| MCE-MIR_3780:rev | 151 | 578   | 157 |
| cand648          | 150 | 808   | 27  |
| MCE-MIR_2999:fwd | 150 | 390   | 83  |
| MIR47            | 149 | 2,891 | 46  |
| mmu-mir-129-5p   | 149 | 428   | 180 |
| MCE-MIR_5061:rev | 148 | 225   | 421 |
| S-mmu-mir-30e    | 148 | 965   | 58  |
| cand686          | 144 | 181   | 498 |
| mmu-mir-292-5p   | 143 | 260   | 36  |
| cand699          | 140 | 186   | 260 |
| mmu-mir-184      | 140 | 301   | 338 |
| cand279:b        | 139 | 179   | 240 |
| mmu-mir-299      | 138 | 585   | 102 |
| cand557          | 136 | 169   | 214 |
| MCE-MIR_451:rev  | 135 | 342   | 48  |
| cand616:a        | 134 | 246   | 382 |
| cand213          | 133 | 269   | 110 |
| MCE-MIR_4791:fwd | 132 | 408   | 78  |
| MCE-MIR_4027:rev | 132 | 167   | 218 |
| MCE-MIR_1746:rev | 132 | 561   | 65  |
| MCE-MIR_5068:rev | 131 | 75    | 637 |
| MCE-MIR_4799:rev | 131 | 339   |     |
| mmu-mir-380-3p   | 130 | 494   | 313 |
| cand515          | 130 | 61    | 126 |
| MCE-MIR_2680:rev | 129 | 875   | 121 |
| cand126          | 126 | 552   | 25  |
| MCE-MIR_1792:rev | 125 | 606   | 39  |
| cand374:b        | 123 | 294   | 89  |
| MCE-MIR_5088:rev | 121 | 60    | 37  |
| MCE-MIR_1342:fwd | 120 | 125   |     |
| cand501          | 119 | 206   | 154 |
| MCE-MIR_725:fwd  | 119 | 198   | 254 |
| mmu-mir-370      | 119 | 284   | 122 |
| cand203          | 118 | 590   | 125 |
| cand302:b        | 117 | 834   | 134 |
| mmu-mir-377      | 114 | 440   | 47  |

| Array Chip ID:   | 204 | 216   | 246 |
|------------------|-----|-------|-----|
| MCE-MIR_3490:rev | 114 | 142   | 265 |
| MCE-MIR_298:rev  | 110 | 156   | 112 |
| cand324:b        | 105 | 507   | 126 |
| MCE-MIR_5197:rev | 104 | 95    |     |
| mmu-mir-485-3p   | 104 | 372   | 69  |
| MCE-MIR_670:fwd  | 104 | 257   | 25  |
| MCE-MIR_273:fwd  | 103 | 145   | 269 |
| cand650          | 103 | 302   | 76  |
| cand106:b        | 100 | 223   | 77  |
| cand78:a         | 100 | 244   | 305 |
| mmu-mir-196a     | 98  | 524   | 396 |
| MIR206           | 95  | 147   | 258 |
| cand297:a        | 92  | 315   | 36  |
| mmu-mir-296      | 91  | 271   | 66  |
| MCE-MIR_4684:fwd | 91  | 123   | 102 |
| MCE-MIR_3523:rev | 91  | 154   | 349 |
| MCE-MIR_1829:rev | 90  | 1,593 | 54  |
| cand707          | 90  | 370   | 52  |
| mmu-mir-188      | 90  | 260   | 179 |
| MCE-MIR_5440:fwd | 89  | 408   | 25  |
| MCE-MIR_1283:fwd | 89  | 189   | 164 |
| cand129          | 88  | 284   | 28  |
| mmu-mir-468      | 88  | 263   | 75  |
| mmu-mir-201      | 87  | 370   | 144 |
| mmu-mir-224      | 86  | 209   | 102 |
| MCE-MIR_534:fwd  | 86  | 265   |     |
| MCE-MIR_4472:fwd | 85  | 177   | 43  |
| MCE-MIR_988:fwd  | 85  | 180   | 189 |
| MCE-MIR_3609:rev | 84  | 126   | 80  |
| cand104:b        | 83  | 177   | 99  |
| MCE-MIR_1514:fwd | 83  | 135   | 31  |
| cand156          | 81  | 430   | 26  |
| MCE-MIR_2524:fwd | 81  | 99    | 61  |
| cand179:a        | 81  | 250   | 13  |
| MCE-MIR_5511:rev | 81  | 183   |     |
| MCE-MIR_530:fwd  | 80  | 312   | 75  |
| mmu-mir-425      | 79  | 311   | 112 |
| MCE-MIR_3685:fwd | 78  | 725   | 34  |
| S-'mmu-mir-376b  | 78  | 400   | 273 |

| Array Chip ID:   | 204 | 216 | 246 |
|------------------|-----|-----|-----|
| cand24           | 77  | 115 | 138 |
| MCE-MIR_4922:fwd | 76  | 508 | 64  |
| mmu-mir-292-3p   | 76  | 72  | 81  |
| MCE-MIR_5473:rev | 76  | 210 | 173 |
| mmu-mir-219      | 76  | 591 | 30  |
| MCE-MIR_543:fwd  | 76  | 139 | 163 |
| MCE-MIR_557:fwd  | 74  | 199 | 182 |
| MCE-MIR_5300:fwd | 74  | 139 | 130 |
| MCE-MIR_5152:rev | 73  | 214 | 24  |
| MCE-MIR_5366:rev | 73  | 31  | 125 |
| cand467          | 73  | 185 | 34  |
| cand346          | 73  | 198 | 93  |
| mmu-mir-323      | 72  | 314 | 90  |
| cand624          | 71  | 104 | 129 |
| mmu-mir-339      | 71  | 272 | 44  |
| MCE-MIR_5363:rev | 71  | 105 | 127 |
| mmu-mir-467      | 70  | 131 | 69  |
| cand42:b         | 69  | 49  | 77  |
| cand91:a         | 69  | 43  | 161 |
| MCE-MIR_5295:rev | 67  | 150 | 140 |
| MCE-MIR_4661:rev | 66  | 600 | 27  |
| cand276:b        | 65  | 188 | 43  |
| MCE-MIR_1352:fwd | 65  | 73  | 152 |
| MCE-MIR_5322:fwd | 64  | 181 | 183 |
| S-'mmu-let-7d    | 64  | 193 | 88  |
| MCE-MIR_3624:rev | 63  | 74  | 144 |
| MCE-MIR_6107:fwd | 63  | 148 |     |
| MCE-MIR_3958:fwd | 62  | 64  | 350 |
| MCE-MIR_638:fwd  | 62  | 111 | 54  |
| cand563          | 61  | 299 | 54  |
| mmu-mir-485-5p   | 61  | 185 | 74  |
| MCE-MIR_4922:rev | 61  | 106 | 26  |
| MCE-MIR_5141:rev | 60  | 443 | 24  |
| mmu-mir-539      | 60  | 218 | 310 |
| cand210:b        | 59  | 162 | 35  |
| MIR166           | 59  | 101 | 318 |
| MCE-MIR_5454:rev | 59  | 163 | 186 |
| MCE-MIR_4763:fwd | 58  | 194 | 137 |
| cand279:a        | 58  | 88  | 97  |

| Array Chip ID:   | 204 | 216 | 246 |
|------------------|-----|-----|-----|
| MCE-MIR_1986:fwd | 58  | 168 | 59  |
| MCE-MIR_1066:rev | 58  | 110 | 35  |
| mmu-mir-369-5p   | 57  | 259 | 106 |
| cand500:b        | 57  | 166 | 57  |
| cand347          | 57  | 116 | 202 |
| MCE-MIR_2983:rev | 57  | 58  | 30  |
| mmu-mir-489      | 57  | 181 | 111 |
| MCE-MIR_2099:fwd | 56  | 132 | 52  |
| MCE-MIR_3557:rev | 56  | 72  | 68  |
| MCE-MIR_3531:rev | 56  | 61  | 217 |
| MCE-MIR_1973:fwd | 56  | 302 | 54  |
| MCE-MIR_5643:fwd | 56  | 207 | 51  |
| mmu-mir-293      | 55  | 56  | 32  |
| MCE-MIR_3572:rev | 53  | 46  | 122 |
| mmu-mir-291b-5p  | 52  | 76  | 123 |
| MCE-MIR_3762:rev | 51  | 68  | 102 |
| mmu-mir-294      | 51  | 49  |     |
| MCE-MIR_5083:rev | 50  | 134 | 54  |
| MCE-MIR_3628:rev | 50  | 66  | 124 |
| MCE-MIR_2349:rev | 50  | 88  | 85  |
| MCE-MIR_2679:fwd | 50  | 44  | 398 |
| MCE-MIR_5488:rev | 49  | 139 | 96  |
| mmu-mir-291a-3p  | 49  | 54  | 32  |
| MCE-MIR_5354:rev | 49  | 105 | 74  |
| MCE-MIR_5193:rev | 49  | 66  | 56  |
| MCE-MIR_3820:fwd | 48  | 95  | 120 |
| MCE-MIR_936:rev  | 48  | 89  | 105 |
| mmu-mir-208      | 48  | 210 | 67  |
| MCE-MIR_4752:rev | 47  | 79  | 128 |
| cand153:b        | 46  | 133 | 42  |
| MCE-MIR_1536:rev | 46  | 74  |     |
| cand42:a         | 45  | 248 | 67  |
| MCE-MIR_3886:fwd | 44  | 38  | 39  |
| MCE-MIR_2889:fwd | 44  | 113 | 32  |
| MCE-MIR_5443:fwd | 44  | 187 | 109 |
| cand692:a        | 43  | 81  | 83  |
| mmu-mir-326      | 43  | 188 | 25  |
| mmu-mir-540      | 43  | 131 | 42  |
| MCE-MIR_3541:rev | 43  | 81  | 33  |

| Array Chip ID:   | 204 | 216 | 246 |
|------------------|-----|-----|-----|
| MCE-MIR_1371:fwd | 43  | 77  | 57  |
| MCE-MIR_5055:rev | 42  | 58  | 48  |
| cand588          | 42  | 52  | 127 |
| MCE-MIR_5411:rev | 42  | 401 | 30  |
| MCE-MIR_4714:fwd | 42  | 76  | 100 |
| cand545          | 42  | 128 | 26  |
| cand618          | 42  | 35  | 79  |
| cand459          | 41  | 91  | 81  |
| MCE-MIR_1364:fwd | 40  | 75  | 30  |
| MIR201           | 39  | 343 | 22  |
| MCE-MIR_463:fwd  | 39  | 121 | 91  |
| MCE-MIR_5210:fwd | 39  | 64  | 112 |
| MCE-MIR_1773:rev | 39  | 41  | 42  |
| cand457:a        | 39  | 128 | 28  |
| mmu-mir-465      | 39  | 159 | 299 |
| mmu-mir-466      | 39  | 105 | 40  |
| MCE-MIR_3408:fwd | 39  | 70  | 79  |
| MCE-MIR_4712:fwd | 38  | 87  | 123 |
| MCE-MIR_3260:rev | 37  | 110 | 114 |
| MCE-MIR_5056:rev | 37  | 60  | 49  |
| MCE-MIR_5641:rev | 37  | 145 | 36  |
| MCE-MIR_4627:fwd | 37  | 162 | 31  |
| MCE-MIR_4748:rev | 37  | 42  | 84  |
| MCE-MIR_2714:rev | 36  | 56  | 22  |
| cand5            | 36  | 64  | 103 |
| MCE-MIR_1784:fwd | 36  | 127 |     |
| MCE-MIR_4202:rev | 36  | 55  | 50  |
| MIR103           | 35  | 46  | 88  |
| MCE-MIR_4714:rev | 35  | 95  |     |
| MCE-MIR_3663:fwd | 34  | 36  | 54  |
| mmu-mir-325      | 34  | 93  | 57  |
| mmu-mir-542-5p   | 34  | 102 | 48  |
| mmu-mir-295      | 33  | 36  | 15  |
| MCE-MIR_5384:rev | 33  | 84  | 17  |
| MCE-MIR_4791:rev | 32  | 129 | 44  |
| MCE-MIR_3624:fwd | 32  |     | 36  |
| mmu-mir-189      | 32  | 167 | 33  |
| cand178:b        | 32  | 158 |     |
| MCE-MIR_4031:fwd | 32  | 34  | 76  |



| <b>Array Chip ID:</b> | <b>204</b> | <b>216</b> | <b>246</b> |
|-----------------------|------------|------------|------------|
| MCE-MIR_4010:rev      | 32         | 47         | 25         |
| cand6                 | 32         | 49         | 77         |
| MCE-MIR_4756:rev      | 32         | 60         | 112        |
| MCE-MIR_4674:fwd      | 32         | 123        | 223        |
| MCE-MIR_4320:rev      | 32         | 134        | 16         |
| cand226               | 31         | 104        | 26         |
| MCE-MIR_1495:fwd      | 31         | 43         | 48         |
| MCE-MIR_3441:fwd      | 30         | 30         | 31         |
| MCE-MIR_5369:rev      | 30         | 26         | 27         |
| MCE-MIR_4022:fwd      | 30         | 26         | 45         |
| cand352:b             | 30         | 61         | 25         |
| MCE-MIR_5216:rev      | 30         | 63         | 29         |
| cand73                | 30         | 69         |            |
| MCE-MIR_3847:rev      | 30         | 32         | 18         |
| MCE-MIR_2977:rev      | 30         | 109        | 24         |
| MCE-MIR_4726:fwd      | 30         | 157        | 30         |
| mmu-mir-215           | 29         | 76         | 120        |
| MCE-MIR_2196:fwd      | 28         | 35         | 53         |
| MCE-MIR_2361:fwd      | 28         | 202        | 16         |
| MCE-MIR_3059:rev      | 27         | 20         | 31         |
| MCE-MIR_2364:rev      | 27         | 40         | 17         |
| cand532:b             | 27         | 256        | 24         |
| MCE-MIR_1611:fwd      | 26         | 58         | 21         |
| MCE-MIR_5389:rev      | 26         | 35         | 36         |
| cand462               | 26         | 68         | 31         |
| cand100:b             |            |            |            |
| cand103:a             |            | 55         | 26         |
| cand109:b             |            | 39         | 45         |
| cand11:a              |            |            |            |
| cand115:b             |            | 47         |            |
| cand120               |            | 19         |            |
| cand130               |            | 48         |            |
| cand139               |            |            |            |
| cand144:b             |            | 38         |            |
| cand149:a             |            |            |            |
| cand149:b             |            | 27         |            |
| cand152:a             |            | 22         | 15         |
| cand172:a             |            | 40         | 21         |
| cand179:b             |            | 228        | 35         |

| <b>Array Chip ID:</b> | <b>204</b> | <b>216</b> | <b>246</b> |
|-----------------------|------------|------------|------------|
| cand184               |            | 26         |            |
| cand192               |            | 16         |            |
| cand200               |            | 45         |            |
| cand202               |            |            |            |
| cand224               |            |            |            |
| cand234               |            |            |            |
| cand244               |            | 43         |            |
| cand25                |            |            |            |
| cand27                |            | 82         |            |
| cand275               |            |            |            |
| cand278:b             |            |            |            |
| cand286               |            |            | 34         |
| cand302:a             |            |            | 27         |
| cand309               |            |            |            |
| cand334:a             |            | 23         | 13         |
| cand334:b             |            |            | 23         |
| cand340               |            |            | 17         |
| cand342:b             |            | 43         |            |
| cand349:b             |            |            |            |
| cand35                |            |            |            |
| cand351               |            | 91         | 20         |
| cand352:a             |            |            |            |
| cand361               |            |            |            |
| cand386:a             |            |            | 23         |
| cand386:b             |            | 31         |            |
| cand40                |            |            | 23         |
| cand412               |            | 64         | 24         |
| cand415               |            |            | 31         |
| cand418               |            | 104        | 31         |
| cand427               |            |            |            |
| cand445               |            | 78         |            |
| cand457:b             |            | 24         | 19         |
| cand465:a             |            | 28         |            |
| cand465:b             |            |            |            |
| cand492               |            |            |            |
| cand524               |            |            |            |
| cand529               |            |            |            |
| cand532:a             |            | 36         | 80         |
| cand541               |            | 38         | 25         |

| Array Chip ID:   | 204 | 216 | 246 |
|------------------|-----|-----|-----|
| cand549          |     |     |     |
| cand57           |     | 97  |     |
| cand570          |     | 32  |     |
| cand585          |     |     |     |
| cand590          |     |     |     |
| cand595:a        |     |     |     |
| cand616:b        |     |     |     |
| cand619          |     | 173 | 18  |
| cand64           |     |     |     |
| cand65           |     | 20  | 32  |
| cand664          |     |     |     |
| cand667:b        |     |     |     |
| cand669          |     | 19  |     |
| cand678          |     |     |     |
| cand690          |     | 69  |     |
| cand7            |     |     |     |
| cand70           |     |     |     |
| cand705          |     | 20  | 22  |
| cand708:a        |     | 419 | 59  |
| cand718:a        |     |     | 20  |
| cand82           |     |     |     |
| cand91:b         |     |     |     |
| MCE-MIR_1015:rev |     | 30  | 49  |
| MCE-MIR_1046:rev |     | 54  | 45  |
| MCE-MIR_1052:rev |     |     | 18  |
| MCE-MIR_1059:fwd |     | 17  |     |
| MCE-MIR_1074:rev |     | 78  | 16  |
| MCE-MIR_1192:rev |     | 19  |     |
| MCE-MIR_1226:fwd |     |     |     |
| MCE-MIR_1259:rev |     |     |     |
| MCE-MIR_1264:rev |     |     |     |
| MCE-MIR_1269:rev |     |     |     |
| MCE-MIR_1283:rev |     | 36  |     |
| MCE-MIR_1311:rev |     |     |     |
| MCE-MIR_1356:fwd |     |     |     |
| MCE-MIR_1356:rev |     |     |     |
| MCE-MIR_1365:rev |     |     |     |
| MCE-MIR_1401:fwd |     |     |     |
| MCE-MIR_1408:fwd |     | 92  |     |

| Array Chip ID:   | 204 | 216 | 246 |
|------------------|-----|-----|-----|
| MCE-MIR_1412:fwd |     |     |     |
| MCE-MIR_1433:fwd |     |     | 23  |
| MCE-MIR_1433:rev |     |     |     |
| MCE-MIR_1442:fwd |     |     |     |
| MCE-MIR_1458:rev |     | 24  | 41  |
| MCE-MIR_1478:fwd |     |     | 30  |
| MCE-MIR_1482:rev |     |     |     |
| MCE-MIR_1508:fwd |     | 32  |     |
| MCE-MIR_151:fwd  |     | 16  | 20  |
| MCE-MIR_1544:rev |     | 27  | 25  |
| MCE-MIR_1546:rev |     |     |     |
| MCE-MIR_1569:rev |     | 40  | 26  |
| MCE-MIR_1576:rev |     | 18  | 21  |
| MCE-MIR_162:fwd  |     |     | 22  |
| MCE-MIR_1642:rev |     |     |     |
| MCE-MIR_1645:rev |     |     |     |
| MCE-MIR_1670:fwd |     |     |     |
| MCE-MIR_1679:fwd |     |     |     |
| MCE-MIR_1689:rev |     |     |     |
| MCE-MIR_1697:fwd |     |     |     |
| MCE-MIR_1710:rev |     |     |     |
| MCE-MIR_1742:rev |     | 31  | 22  |
| MCE-MIR_1756:rev |     | 17  | 24  |
| MCE-MIR_1786:fwd |     |     |     |
| MCE-MIR_1788:fwd |     | 27  |     |
| MCE-MIR_1788:rev |     |     | 24  |
| MCE-MIR_1793:fwd |     |     |     |
| MCE-MIR_18:fwd   |     |     |     |
| MCE-MIR_1811:rev |     | 23  | 23  |
| MCE-MIR_1857:fwd |     |     |     |
| MCE-MIR_188:fwd  |     |     |     |
| MCE-MIR_1905:rev |     |     |     |
| MCE-MIR_1929:fwd |     |     |     |
| MCE-MIR_1931:fwd |     | 23  | 29  |
| MCE-MIR_1974:fwd |     | 47  |     |
| MCE-MIR_1998:fwd |     |     |     |
| MCE-MIR_2078:fwd |     | 30  |     |
| MCE-MIR_2087:rev |     |     |     |
| MCE-MIR_2092:fwd |     | 22  |     |

| <b>Array Chip ID:</b> | <b>204</b> | <b>216</b> | <b>246</b> |
|-----------------------|------------|------------|------------|
| MCE-MIR_2111:fwd      |            | 23         | 23         |
| MCE-MIR_2134:fwd      |            | 32         | 51         |
| MCE-MIR_2166:fwd      |            |            | 20         |
| MCE-MIR_2166:rev      |            |            |            |
| MCE-MIR_2173:rev      |            |            |            |
| MCE-MIR_2192:rev      |            |            |            |
| MCE-MIR_2197:fwd      |            |            |            |
| MCE-MIR_2198:fwd      |            |            |            |
| MCE-MIR_2205:fwd      |            |            |            |
| MCE-MIR_2285:fwd      |            | 20         | 24         |
| MCE-MIR_2288:fwd      |            |            |            |
| MCE-MIR_2304:rev      |            |            |            |
| MCE-MIR_2339:fwd      |            |            | 14         |
| MCE-MIR_2339:rev      |            |            |            |
| MCE-MIR_2345:fwd      |            | 50         | 29         |
| MCE-MIR_2371:fwd      |            |            |            |
| MCE-MIR_2371:rev      |            |            |            |
| MCE-MIR_2417:fwd      |            |            |            |
| MCE-MIR_2419:fwd      |            |            |            |
| MCE-MIR_2464:fwd      |            | 30         | 22         |
| MCE-MIR_2474:rev      |            | 45         |            |
| MCE-MIR_2501:fwd      |            | 19         | 27         |
| MCE-MIR_2522:rev      |            |            |            |
| MCE-MIR_2566:fwd      |            | 42         | 18         |
| MCE-MIR_2566:rev      |            |            |            |
| MCE-MIR_2617:fwd      |            | 26         |            |
| MCE-MIR_2624:rev      |            |            |            |
| MCE-MIR_2661:rev      |            |            |            |
| MCE-MIR_2680:fwd      |            | 145        |            |
| MCE-MIR_2691:rev      |            |            |            |
| MCE-MIR_2711:rev      |            |            |            |
| MCE-MIR_2722:rev      |            |            |            |
| MCE-MIR_2798:fwd      |            |            |            |
| MCE-MIR_281:rev       |            |            |            |
| MCE-MIR_2815:fwd      |            | 59         | 29         |
| MCE-MIR_2866:rev      |            | 45         | 50         |
| MCE-MIR_2894:fwd      |            |            |            |
| MCE-MIR_2902:fwd      |            |            |            |
| MCE-MIR_2902:rev      |            | 70         |            |

| <b>Array Chip ID:</b> | <b>204</b> | <b>216</b> | <b>246</b> |
|-----------------------|------------|------------|------------|
| MCE-MIR_291:rev       |            |            |            |
| MCE-MIR_293:fwd       |            |            |            |
| MCE-MIR_293:rev       |            |            |            |
| MCE-MIR_2968:fwd      |            | 15         | 18         |
| MCE-MIR_2986:fwd      |            | 71         |            |
| MCE-MIR_3007:rev      |            |            |            |
| MCE-MIR_3032:fwd      |            |            |            |
| MCE-MIR_3048:rev      |            |            |            |
| MCE-MIR_3057:fwd      |            |            |            |
| MCE-MIR_3057:rev      |            |            |            |
| MCE-MIR_3084:fwd      |            |            |            |
| MCE-MIR_3101:rev      |            | 21         | 32         |
| MCE-MIR_3113:fwd      |            |            |            |
| MCE-MIR_3226:fwd      |            |            |            |
| MCE-MIR_3261:fwd      |            | 34         | 66         |
| MCE-MIR_329:fwd       |            | 27         |            |
| MCE-MIR_3330:fwd      |            | 19         | 29         |
| MCE-MIR_3333:rev      |            |            |            |
| MCE-MIR_334:rev       |            | 26         |            |
| MCE-MIR_3379:fwd      |            |            |            |
| MCE-MIR_3407:rev      |            |            |            |
| MCE-MIR_3429:fwd      |            |            |            |
| MCE-MIR_3429:rev      |            |            | 81         |
| MCE-MIR_3439:rev      |            |            | 20         |
| MCE-MIR_3444:rev      |            |            |            |
| MCE-MIR_3471:rev      |            |            | 19         |
| MCE-MIR_3474:rev      |            |            |            |
| MCE-MIR_3477:rev      |            | 20         | 31         |
| MCE-MIR_3478:rev      |            |            | 54         |
| MCE-MIR_3492:fwd      |            |            |            |
| MCE-MIR_3513:fwd      |            |            |            |
| MCE-MIR_3518:rev      |            |            | 38         |
| MCE-MIR_3522:rev      |            |            | 26         |
| MCE-MIR_3550:fwd      |            |            | 19         |
| MCE-MIR_3613:rev      |            | 21         | 64         |
| MCE-MIR_3619:rev      |            |            | 17         |
| MCE-MIR_3637:rev      |            |            |            |
| MCE-MIR_364:fwd       |            |            |            |
| MCE-MIR_3646:rev      |            |            |            |

| <b>Array Chip ID:</b> | <b>204</b> | <b>216</b> | <b>246</b> |
|-----------------------|------------|------------|------------|
| MCE-MIR_3651:fwd      |            |            | 57         |
| MCE-MIR_3653:rev      |            | 49         | 35         |
| MCE-MIR_3667:fwd      |            |            | 22         |
| MCE-MIR_3667:rev      |            |            |            |
| MCE-MIR_3684:rev      |            | 39         | 37         |
| MCE-MIR_3695:fwd      |            |            |            |
| MCE-MIR_3715:rev      |            |            |            |
| MCE-MIR_3754:rev      |            | 31         | 51         |
| MCE-MIR_3791:rev      |            | 20         |            |
| MCE-MIR_3793:rev      |            |            |            |
| MCE-MIR_3797:fwd      |            | 28         | 22         |
| MCE-MIR_3832:rev      |            |            |            |
| MCE-MIR_3841:fwd      |            |            |            |
| MCE-MIR_3859:rev      |            |            |            |
| MCE-MIR_3867:rev      |            |            |            |
| MCE-MIR_3886:rev      |            |            |            |
| MCE-MIR_3888:rev      |            |            |            |
| MCE-MIR_399:fwd       |            |            |            |
| MCE-MIR_4015:fwd      |            |            | 16         |
| MCE-MIR_4034:rev      |            |            | 24         |
| MCE-MIR_405:rev       |            |            |            |
| MCE-MIR_406:rev       |            | 58         |            |
| MCE-MIR_4060:rev      |            |            |            |
| MCE-MIR_4061:rev      |            |            |            |
| MCE-MIR_4063:fwd      |            |            |            |
| MCE-MIR_4063:rev      |            |            |            |
| MCE-MIR_4069:rev      |            |            |            |
| MCE-MIR_407:fwd       |            |            |            |
| MCE-MIR_4087:rev      |            |            |            |
| MCE-MIR_4124:fwd      |            |            |            |
| MCE-MIR_4153:fwd      |            |            |            |
| MCE-MIR_4179:fwd      |            |            |            |
| MCE-MIR_4179:rev      |            |            |            |
| MCE-MIR_4182:rev      |            |            |            |
| MCE-MIR_4198:fwd      |            | 49         | 33         |
| MCE-MIR_4207:fwd      |            |            |            |
| MCE-MIR_4209:fwd      |            |            |            |
| MCE-MIR_4232:fwd      |            |            |            |
| MCE-MIR_4236:rev      |            |            |            |

| <b>Array Chip ID:</b> | <b>204</b> | <b>216</b> | <b>246</b> |
|-----------------------|------------|------------|------------|
| MCE-MIR_4239:rev      |            | 49         | 31         |
| MCE-MIR_4280:fwd      |            |            |            |
| MCE-MIR_4280:rev      |            |            |            |
| MCE-MIR_4303:fwd      |            |            |            |
| MCE-MIR_4342:fwd      |            | 95         | 62         |
| MCE-MIR_4345:rev      |            | 17         |            |
| MCE-MIR_4353:rev      |            |            |            |
| MCE-MIR_4383:rev      |            |            |            |
| MCE-MIR_4413:fwd      |            |            |            |
| MCE-MIR_4442:fwd      |            |            |            |
| MCE-MIR_4449:rev      |            |            |            |
| MCE-MIR_4474:fwd      |            |            |            |
| MCE-MIR_4491:fwd      |            |            |            |
| MCE-MIR_4491:rev      |            |            |            |
| MCE-MIR_4493:fwd      |            |            |            |
| MCE-MIR_4497:rev      |            |            |            |
| MCE-MIR_4503:rev      |            |            |            |
| MCE-MIR_4513:fwd      |            |            |            |
| MCE-MIR_4521:fwd      |            |            |            |
| MCE-MIR_4521:rev      |            |            |            |
| MCE-MIR_4554:rev      |            | 33         | 25         |
| MCE-MIR_4592:fwd      |            |            |            |
| MCE-MIR_4607:fwd      |            |            |            |
| MCE-MIR_4610:fwd      |            |            |            |
| MCE-MIR_4614:rev      |            | 18         | 13         |
| MCE-MIR_466:fwd       |            | 16         |            |
| MCE-MIR_4667:fwd      |            |            |            |
| MCE-MIR_4675:fwd      |            | 33         |            |
| MCE-MIR_469:fwd       |            | 25         |            |
| MCE-MIR_4711:fwd      |            | 17         |            |
| MCE-MIR_4712:rev      |            |            |            |
| MCE-MIR_4716:fwd      |            | 21         |            |
| MCE-MIR_4726:rev      |            | 52         | 52         |
| MCE-MIR_4738:fwd      |            |            | 26         |
| MCE-MIR_4745:fwd      |            |            |            |
| MCE-MIR_4755:fwd      |            | 53         | 25         |
| MCE-MIR_4762:fwd      |            | 23         |            |
| MCE-MIR_4789:rev      |            |            |            |
| MCE-MIR_4809:fwd      |            |            |            |



| <b>Array Chip ID:</b> | <b>204</b> | <b>216</b> | <b>246</b> |
|-----------------------|------------|------------|------------|
| MCE-MIR_482:fwd       |            |            |            |
| MCE-MIR_482:rev       |            |            |            |
| MCE-MIR_4830:fwd      |            |            |            |
| MCE-MIR_4832:rev      |            |            |            |
| MCE-MIR_4853:fwd      |            |            |            |
| MCE-MIR_4893:fwd      |            | 23         | 20         |
| MCE-MIR_4893:rev      |            | 19         |            |
| MCE-MIR_4932:rev      |            | 33         | 17         |
| MCE-MIR_4972:fwd      |            |            |            |
| MCE-MIR_4978:rev      |            | 21         |            |
| MCE-MIR_5004:rev      |            | 52         |            |
| MCE-MIR_5008:rev      |            |            |            |
| MCE-MIR_5033:rev      |            |            |            |
| MCE-MIR_504:fwd       |            |            |            |
| MCE-MIR_5046:rev      |            |            |            |
| MCE-MIR_5055:fwd      |            |            | 14         |
| MCE-MIR_5100:rev      |            |            | 29         |
| MCE-MIR_5105:rev      |            | 17         |            |
| MCE-MIR_5122:rev      |            | 19         |            |
| MCE-MIR_5135:fwd      |            | 56         |            |
| MCE-MIR_5143:rev      |            |            |            |
| MCE-MIR_5152:fwd      |            |            | 29         |
| MCE-MIR_5167:fwd      |            |            |            |
| MCE-MIR_5167:rev      |            |            |            |
| MCE-MIR_5180:fwd      |            |            |            |
| MCE-MIR_5180:rev      |            |            |            |
| MCE-MIR_5236:rev      |            |            |            |
| MCE-MIR_5260:fwd      |            |            |            |
| MCE-MIR_5276:fwd      |            | 59         | 13         |
| MCE-MIR_5279:fwd      |            |            |            |
| MCE-MIR_5287:rev      |            |            |            |
| MCE-MIR_5300:rev      |            |            | 23         |
| MCE-MIR_5303:fwd      |            |            |            |
| MCE-MIR_5322:rev      |            |            |            |
| MCE-MIR_5328:rev      |            |            |            |
| MCE-MIR_5339:rev      |            | 60         | 35         |
| MCE-MIR_5340:fwd      |            |            |            |
| MCE-MIR_5363:fwd      |            | 60         |            |
| MCE-MIR_5374:rev      |            |            |            |

| <b>Array Chip ID:</b> | <b>204</b> | <b>216</b> | <b>246</b> |
|-----------------------|------------|------------|------------|
| MCE-MIR_5396:rev      |            |            | 19         |
| MCE-MIR_5406:rev      |            |            | 27         |
| MCE-MIR_5418:fwd      |            | 107        |            |
| MCE-MIR_5470:fwd      |            | 60         |            |
| MCE-MIR_5473:fwd      |            | 39         | 31         |
| MCE-MIR_5503:rev      |            | 29         |            |
| MCE-MIR_5504:rev      |            |            |            |
| MCE-MIR_5581:fwd      |            |            |            |
| MCE-MIR_5581:rev      |            |            | 23         |
| MCE-MIR_5596:rev      |            | 33         |            |
| MCE-MIR_5597:fwd      |            | 34         | 25         |
| MCE-MIR_5598:fwd      |            |            |            |
| MCE-MIR_5607:rev      |            | 95         | 15         |
| MCE-MIR_5620:fwd      |            | 61         | 35         |
| MCE-MIR_5623:rev      |            |            | 21         |
| MCE-MIR_5704:rev      |            |            |            |
| MCE-MIR_5712:rev      |            |            |            |
| MCE-MIR_5736:rev      |            | 30         | 21         |
| MCE-MIR_5745:fwd      |            | 68         |            |
| MCE-MIR_5790:fwd      |            |            |            |
| MCE-MIR_5864:fwd      |            |            |            |
| MCE-MIR_5872:fwd      |            | 86         |            |
| MCE-MIR_5914:rev      |            | 31         |            |
| MCE-MIR_5970:rev      |            |            |            |
| MCE-MIR_6001:rev      |            |            |            |
| MCE-MIR_6026:fwd      |            | 22         |            |
| MCE-MIR_6026:rev      |            | 89         |            |
| MCE-MIR_6033:fwd      |            |            |            |
| MCE-MIR_6034:rev      |            |            |            |
| MCE-MIR_6050:rev      |            | 76         | 35         |
| MCE-MIR_6055:rev      |            | 44         |            |
| MCE-MIR_6084:rev      |            | 27         |            |
| MCE-MIR_6120:fwd      |            |            |            |
| MCE-MIR_689:rev       |            |            |            |
| MCE-MIR_734:fwd       |            |            | 26         |
| MCE-MIR_774:rev       |            |            |            |
| MCE-MIR_777:rev       |            |            |            |
| MCE-MIR_780:rev       |            | 31         |            |
| MCE-MIR_782:rev       |            |            |            |

| <b>Array Chip ID:</b> | <b>204</b> | <b>216</b> | <b>246</b> |
|-----------------------|------------|------------|------------|
| MCE-MIR_809:fwd       |            | 27         |            |
| MCE-MIR_81:fwd        |            |            |            |
| MCE-MIR_855:fwd       |            |            |            |
| MCE-MIR_855:rev       |            |            |            |
| MCE-MIR_871:fwd       |            | 15         | 18         |
| MCE-MIR_871:rev       |            |            |            |
| MCE-MIR_89:fwd        |            |            |            |
| MCE-MIR_942:rev       |            | 33         |            |
| MCE-MIR_946:rev       |            |            |            |
| MCE-MIR_959:rev       |            |            |            |
| MCE-MIR_993:rev       |            |            |            |
| MIR100                |            |            |            |
| MIR122                |            | 836        |            |
| MIR140                |            |            |            |
| MIR161                |            | 16         |            |
| MIR169                |            |            |            |
| MIR177                |            |            |            |
| MIR180                |            |            |            |
| MIR184                |            |            |            |
| MIR188                |            |            |            |
| MIR220                |            |            |            |
| MIR237                |            |            |            |
| MIR255                |            |            |            |
| MIR52                 |            |            |            |
| MIR70                 |            |            |            |
| MIR71                 |            |            |            |
| MIR79                 |            |            |            |
| mmu-mir-135a          |            | 144        | 70         |
| mmu-mir-135b          |            |            |            |
| mmu-mir-136           |            |            |            |
| mmu-mir-190           |            | 82         |            |
| mmu-mir-193           |            | 157        | 23         |
| mmu-mir-196b          |            | 56         |            |
| mmu-mir-207           |            | 46         | 51         |
| mmu-mir-211           |            |            | 19         |
| mmu-mir-216           |            | 53         | 25         |
| mmu-mir-217           |            | 24         | 25         |
| mmu-mir-291a-5p       |            | 41         |            |
| mmu-mir-291b-3p       |            |            |            |

| <b>Array Chip ID:</b> | <b>204</b> | <b>216</b> | <b>246</b> |
|-----------------------|------------|------------|------------|
| mmu-mir-297           |            | 29         | 39         |
| mmu-mir-302           |            |            |            |
| mmu-mir-302b          |            |            |            |
| S-mmu-mir-302b        |            |            |            |
| mmu-mir-302c          |            |            |            |
| S-mmu-mir-302c        |            | 20         |            |
| mmu-mir-302d          |            | 27         |            |
| mmu-mir-32            |            | 21         |            |
| mmu-mir-33            |            |            |            |
| mmu-mir-340           |            | 78         | 80         |
| mmu-mir-367           |            |            |            |
| mmu-mir-369-3p        |            | 21         |            |
| S-mmu-mir-376a        |            | 36         |            |
| mmu-mir-376c          |            | 16         |            |
| mmu-mir-380-5p        |            | 85         | 72         |
| mmu-mir-384           |            | 17         |            |
| mmu-mir-411           |            |            |            |
| mmu-mir-412           |            | 30         | 30         |
| mmu-mir-433-5p        |            | 105        | 36         |
| mmu-mir-448           |            | 30         |            |
| mmu-mir-452           |            | 40         |            |
| mmu-mir-463           |            | 23         |            |
| mmu-mir-464           |            | 13         |            |
| mmu-mir-469           |            | 67         | 20         |
| mmu-mir-471           |            | 65         | 33         |
| mmu-mir-483           |            | 30         | 19         |
| mmu-mir-542-3p        |            | 142        | 116        |
| mmu-mir-546           |            | 17         |            |
| mmu-mir-547           |            | 66         | 39         |
| mmu-mir-7b            |            | 32         |            |
| mmu-mir-96            |            | 149        | 32         |
| S-mmu-let-7a-1        |            | 32         |            |
| S-mmu-let-7a-2        |            | 17         |            |
| S-mmu-let-7b          |            | 68         | 55         |
| S-mmu-let-7c-1        |            |            |            |
| S-mmu-let-7c-2        |            |            |            |
| S-mmu-let-7e          |            | 83         | 17         |
| S-mmu-let-7f-1        |            |            |            |
| S-mmu-let-7f-2        |            | 13         |            |

| <b>Array Chip ID:</b> | <b>204</b> | <b>216</b> | <b>246</b> |
|-----------------------|------------|------------|------------|
| S-mmu-let-7g          |            | 74         | 40         |
| S-mmu-let-7i          |            | 417        | 89         |
| S-mmu-mir-100         |            | 15         |            |
| S-mmu-mir-101a        |            | 25         |            |
| S-mmu-mir-101b        |            |            |            |
| S-mmu-mir-103-1       |            | 140        | 80         |
| S-mmu-mir-103-2       |            | 45         | 24         |
| S-mmu-mir-106a        |            | 19         |            |
| S-mmu-mir-106b        |            | 1,556      | 445        |
| S-mmu-mir-107         |            | 47         | 26         |
| S-mmu-mir-10a         |            | 148        | 95         |
| S-mmu-mir-10b         |            | 70         | 78         |
| S-mmu-mir-1-1         |            | 28         | 26         |
| S-mmu-mir-1-2         |            | 24         | 12         |
| S-mmu-mir-122a        |            | 1,321      | 106        |
| S-mmu-mir-124a-1      |            | 192        |            |
| S-mmu-mir-124a-2      |            | 192        | 47         |
| S-mmu-mir-124a-3      |            | 218        | 60         |
| S-mmu-mir-125a        |            | 157        | 73         |
| S-mmu-mir-125b-1      |            | 237        | 78         |
| S-mmu-mir-125b-2      |            | 530        | 145        |
| S-mmu-mir-127         |            | 514        | 168        |
| S-mmu-mir-128a        |            | 26         |            |
| S-mmu-mir-128b        |            | 697        | 9          |
| S-mmu-mir-129-1       |            | 4,702      | 320        |
| S-mmu-mir-130a        |            |            |            |
| S-mmu-mir-132         |            | 519        | 63         |
| S-mmu-mir-133a-1      |            | 1,055      | 274        |
| S-mmu-mir-133a-2      |            | 1,130      | 259        |
| S-mmu-mir-133b        |            | 753        |            |
| S-mmu-mir-134         |            | 70         | 16         |
| S-mmu-mir-135a-1      |            | 28         |            |
| S-mmu-mir-135a-2      |            | 101        | 42         |
| S-mmu-mir-137         |            | 33         | 14         |
| S-mmu-mir-138-1       |            | 18         |            |
| S-mmu-mir-138-2       |            | 28         |            |
| S-mmu-mir-139         |            | 113        | 17         |
| S-mmu-mir-141         |            | 119        | 29         |
| S-mmu-mir-143         |            | 123        | 22         |

| <b>Array Chip ID:</b> | <b>204</b> | <b>216</b> | <b>246</b> |
|-----------------------|------------|------------|------------|
| S-mmu-mir-144         |            | 227        | 27         |
| S-mmu-mir-145         |            | 3,335      | 664        |
| S-mmu-mir-146         |            |            |            |
| S-mmu-mir-148a        |            | 31         | 12         |
| S-mmu-mir-148b        |            | 16         |            |
| S-mmu-mir-149         |            | 7,173      | 4,566      |
| S-mmu-mir-150         |            | 463        | 435        |
| S-mmu-mir-151         |            | 6,123      | 2,437      |
| S-mmu-mir-154         |            | 1,023      | 252        |
| S-mmu-mir-15a         |            | 94         | 79         |
| S-mmu-mir-15b         |            | 198        | 32         |
| S-mmu-mir-16-1        |            | 267        | 96         |
| S-mmu-mir-16-2        |            | 56         | 51         |
| S-mmu-mir-18          |            | 116        | 36         |
| S-mmu-mir-181a        |            | 348        | 63         |
| S-mmu-mir-181c        |            | 192        | 52         |
| S-mmu-mir-182         |            | 19         | 24         |
| S-mmu-mir-183         |            |            | 24         |
| S-mmu-mir-184         |            | 20         |            |
| S-mmu-mir-185         |            |            |            |
| S-mmu-mir-186         |            |            |            |
| S-mmu-mir-187         |            | 70         |            |
| S-mmu-mir-188         |            | 32         |            |
| S-mmu-mir-190         |            |            |            |
| S-mmu-mir-191         |            | 62         |            |
| S-mmu-mir-192         |            | 48         |            |
| S-mmu-mir-193         |            | 255        | 113        |
| S-mmu-mir-194-1       |            | 46         |            |
| S-mmu-mir-194-2       |            | 175        | 40         |
| S-mmu-mir-195         |            | 68         | 59         |
| S-mmu-mir-196a-1      |            | 19         | 22         |
| S-mmu-mir-196a-2      |            |            | 22         |
| S-mmu-mir-196b        |            | 102        | 79         |
| S-mmu-mir-199b        |            | 22,864     | 14,886     |
| S-mmu-mir-20          |            | 47         | 15         |
| S-mmu-mir-200a        |            | 115        | 46         |
| S-mmu-mir-200b        |            | 197        | 78         |
| S-mmu-mir-204         |            | 329        | 118        |
| S-mmu-mir-207         |            | 5,435      | 2,876      |

| <b>Array Chip ID:</b> | <b>204</b> | <b>216</b> | <b>246</b> |
|-----------------------|------------|------------|------------|
| S-mmu-mir-208         |            | 590        | 152        |
| S-mmu-mir-21          |            | 118        | 65         |
| S-mmu-mir-210         |            | 101        | 40         |
| S-mmu-mir-211         |            | 799        | 1,284      |
| S-mmu-mir-212         |            | 487        | 140        |
| S-mmu-mir-214         |            | 454        | 88         |
| S-mmu-mir-218-1       |            | 13         | 26         |
| S-mmu-mir-218-2       |            | 23         | 15         |
| S-mmu-mir-219-2       |            | 1,469      | 516        |
| S-mmu-mir-22          |            | 3,400      | 1,014      |
| S-mmu-mir-221         |            | 182        | 41         |
| S-mmu-mir-223         |            | 147        | 55         |
| S-mmu-mir-23a         |            | 222        | 66         |
| S-mmu-mir-23b         |            | 76         |            |
| S-mmu-mir-24-2        |            | 2,573      | 781        |
| S-mmu-mir-25          |            | 147        | 36         |
| S-mmu-mir-26a-1       |            |            |            |
| S-mmu-mir-27a         |            | 91         |            |
| S-mmu-mir-27b         |            | 187        | 42         |
| S-mmu-mir-28          |            | 911        | 285        |
| S-mmu-mir-290         |            |            |            |
| S-mmu-mir-293         |            | 24         |            |
| S-mmu-mir-294         |            |            |            |
| S-mmu-mir-295         |            | 45         | 11         |
| S-mmu-mir-296         |            | 1,081      | 226        |
| S-mmu-mir-298         |            | 24         |            |
| S-mmu-mir-29a         |            | 19         |            |
| S-mmu-mir-29b-1       |            | 293        | 71         |
| S-mmu-mir-29b-2       |            | 426        | 112        |
| S-mmu-mir-300         |            | 99         | 24         |
| S-mmu-mir-30b         |            | 202        | 48         |
| S-mmu-mir-30c-1       |            | 320        | 25         |
| S-mmu-mir-30c-2       |            | 574        | 125        |
| S-mmu-mir-31          |            | 229        | 85         |
| S-mmu-mir-32          |            |            |            |
| S-mmu-mir-323         |            | 22         |            |
| S-mmu-mir-326         |            | 2,403      | 73         |
| S-mmu-mir-328         |            | 7,940      | 1,341      |
| S-mmu-mir-329         |            | 494        | 88         |

| <b>Array Chip ID:</b> | <b>204</b> | <b>216</b> | <b>246</b> |
|-----------------------|------------|------------|------------|
| S-mmu-mir-33          |            | 30         |            |
| S-mmu-mir-330         |            | 483        |            |
| S-mmu-mir-331         |            | 49         | 37         |
| S-mmu-mir-335         |            |            |            |
| S-mmu-mir-337         |            | 817        | 456        |
| S-mmu-mir-338         |            | 233        |            |
| S-mmu-mir-339         |            | 179        | 117        |
| S-mmu-mir-342         |            | 435        | 238        |
| S-mmu-mir-345         |            | 624        | 218        |
| S-mmu-mir-346         |            | 1,332      | 112        |
| S-mmu-mir-34a         |            | 249        | 113        |
| S-mmu-mir-34b         |            | 4,320      | 1,645      |
| S-mmu-mir-34c         |            | 1,961      | 1,075      |
| S-mmu-mir-350         |            | 84         | 24         |
| S-mmu-mir-351         |            | 175        | 102        |
| S-mmu-mir-361         |            | 408        | 112        |
| S-mmu-mir-363         |            | 428        | 35         |
| S-mmu-mir-365-1       |            | 1,257      | 418        |
| S-mmu-mir-365-2       |            | 474        | 149        |
| S-mmu-mir-370         |            | 123        | 30         |
| S-mmu-mir-377         |            | 38         |            |
| S-mmu-mir-378         |            | 11,802     | 6,831      |
| S-mmu-mir-379         |            | 266        | 64         |
| S-mmu-mir-381         |            | 180        | 16         |
| S-mmu-mir-382         |            | 375        | 169        |
| S-mmu-mir-384         |            | 360        | 111        |
| S-mmu-mir-409         |            | 328        |            |
| S-mmu-mir-412         |            | 191        | 106        |
| S-mmu-mir-425         |            | 6,460      | 1,452      |
| S-mmu-mir-431         |            | 192        | 59         |
| S-mmu-mir-448         |            | 49         |            |
| S-mmu-mir-449         |            | 28         |            |
| S-mmu-mir-451         |            | 42         | 27         |
| S-mmu-mir-465         |            | 2,206      | 720        |
| S-mmu-mir-466         |            | 22         |            |
| S-mmu-mir-467         |            | 972        | 240        |
| S-mmu-mir-468         |            | 90         | 27         |
| S-mmu-mir-469         |            | 7,309      | 5,824      |
| S-mmu-mir-471         |            | 1,083      | 256        |



| Array Chip ID: | 204 | 216   | 246   |
|----------------|-----|-------|-------|
| S-mmu-mir-483  |     | 1,023 | 239   |
| S-mmu-mir-484  |     | 2,103 | 1,862 |
| S-mmu-mir-486  |     | 432   | 71    |
| S-mmu-mir-7-1  |     | 626   | 318   |
| S-mmu-mir-7-2  |     | 169   | 70    |
| S-mmu-mir-7b   |     | 89    | 39    |
| S-mmu-mir-92-1 |     | 52    |       |
| S-mmu-mir-92-2 |     | 69    |       |
| S-mmu-mir-93   |     | 226   | 80    |
| S-mmu-mir-96   |     | 14    |       |
| S-mmu-mir-98   |     |       |       |
| S-mmu-mir-99a  |     |       |       |
| S-mmu-mir-99b  |     | 238   | 98    |

**Supplemental Table ST4B: Mouse Array Version 2 data-ES.** This table contains the simple detectable values, which lists average signal values of all transcripts on the array, of the ES-GCNF +/- time series. Each array includes 545 MCE-MIR, 266 mmu-mir, 170 Cand, 46 MIR, and 177 S-mmu-mir. A total of 10 arrays were used in this study. This table represents results obtained with the <200 nt RNA probe from the embryonic stem cell line (ES).

| ES Time:          | Day 0  |        | Day 1  |        | Day 3  |        |        | Day 6  |        |
|-------------------|--------|--------|--------|--------|--------|--------|--------|--------|--------|
|                   | 210    | 357    | 124    | 216    | 217    | 222    | 356    | 222    | 245    |
| MCE-MIR_2563:rev  | 28,952 | 36,727 | 29,972 | 49,192 | 33,250 | 28,246 | 25,091 | 69,869 | 54,257 |
| mmu-mir-294       | 28,798 | 64,320 | 43,281 | 42,890 | 10,732 | 15,640 | 19,635 | 9,433  | 847    |
| mmu-mir-292-3p    | 28,567 | 43,818 | 34,043 | 30,082 | 10,533 | 12,013 | 11,240 | 7,874  | 4,207  |
| MCE-MIR_4453: fwd | 28,324 | 31,160 | 44,292 | 51,511 | 57,954 | 39,555 | 43,066 | 57,660 | 57,702 |
| MCE-MIR_5060:rev  | 25,093 | 32,208 | 38,348 | 45,306 | 51,291 | 43,425 | 39,407 | 42,235 | 64,981 |
| mmu-mir-293       | 23,576 | 40,135 | 28,525 | 27,838 | 9,173  | 10,297 | 10,247 | 6,380  | 2,484  |
| S-mmu-mir-149     | 20,726 | 23,745 |        | 38,367 | 39,003 | 45,642 | 32,511 | 30,720 | 50,082 |
| MCE-MIR_3820:rev  | 20,358 | 20,436 | 29,296 | 41,186 | 42,807 | 42,009 | 32,476 | 37,937 | 54,778 |
| cand706           | 19,771 | 28,157 | 29,660 | 36,962 | 40,419 | 46,497 | 34,324 | 36,933 | 59,225 |
| S-mmu-mir-469     | 19,453 | 22,496 |        | 35,226 | 34,265 | 42,608 | 28,656 | 38,421 | 51,449 |
| cand151           | 19,098 | 21,546 | 24,201 | 40,635 | 43,019 | 43,653 | 34,770 | 37,759 | 59,842 |
| mmu-mir-290       | 19,066 | 32,248 | 22,218 | 26,737 | 8,246  | 11,782 | 7,252  | 8,011  | 2,674  |
| cand516           | 17,618 | 19,274 | 24,701 | 38,890 | 42,184 | 41,325 | 32,395 | 36,533 | 56,808 |
| MCE-MIR_1597: fwd | 17,239 | 16,722 | 20,555 | 30,183 | 37,525 | 40,445 | 25,635 | 30,544 | 53,097 |
| mmu-mir-295       | 17,023 | 23,062 | 13,438 | 22,988 | 3,856  | 4,122  | 1,720  | 832    | 141    |

| ES Time:          | Day 0  |        | Day 1  |        | Day 3  |        |        | Day 6  |        |
|-------------------|--------|--------|--------|--------|--------|--------|--------|--------|--------|
| Array Chip ID:    | 210    | 357    | 124    | 216    | 217    | 222    | 356    | 222    | 245    |
| mmu-mir-292-5p    | 16,982 | 28,005 | 17,987 | 21,228 | 5,874  | 8,195  | 5,154  | 5,799  | 1,153  |
| MCE-MIR_3571:rev  | 16,946 | 13,866 | 17,439 | 24,261 | 27,004 | 32,765 | 20,915 | 25,343 | 34,971 |
| S-mmu-mir-207     | 16,624 | 20,625 |        | 31,630 | 27,495 | 35,028 | 27,695 | 24,489 | 25,572 |
| MCE-MIR_1773: fwd | 15,908 | 14,420 | 17,503 | 23,713 | 29,390 | 32,905 | 26,984 | 27,507 | 27,972 |
| MCE-MIR_4822:rev  | 15,608 | 20,299 | 29,598 | 39,095 | 36,798 | 32,968 | 33,842 | 17,274 | 14,810 |
| MCE-MIR_4274: fwd | 15,564 | 19,198 | 19,537 | 24,415 | 30,492 | 26,323 | 25,505 | 32,698 | 24,878 |
| MCE-MIR_1394:rev  | 15,135 | 31,289 | 30,705 | 34,363 | 36,770 | 38,553 | 28,609 | 25,579 | 25,709 |
| cand385           | 14,841 | 12,992 | 16,612 | 20,842 | 30,105 | 30,941 | 22,597 | 26,522 | 38,633 |
| MCE-MIR_3626:rev  | 14,811 | 8,762  | 10,969 | 13,306 | 23,349 | 17,624 | 17,655 | 30,258 | 21,720 |
| MCE-MIR_5062:rev  | 14,183 | 10,110 | 15,781 | 19,398 | 28,143 | 26,362 | 21,271 | 20,999 | 20,028 |
| MCE-MIR_1539:rev  | 14,065 | 19,791 | 20,222 | 27,199 | 32,324 | 33,934 | 27,249 | 28,391 | 26,712 |
| cand271           | 12,706 | 19,711 | 21,704 | 20,792 | 24,953 | 26,899 | 20,385 | 21,543 | 23,757 |
| cand594           | 12,696 | 13,726 | 15,458 | 19,605 | 22,405 | 20,599 | 17,756 | 21,364 | 15,682 |
| MCE-MIR_3191:rev  | 12,571 | 16,380 | 14,322 | 21,449 | 26,261 | 24,958 | 23,140 | 31,419 | 24,128 |
| MCE-MIR_4087: fwd | 12,478 | 6,591  | 6,814  | 10,898 | 11,841 | 12,142 | 11,647 | 9,529  | 5,738  |
| cand294           | 12,352 | 2,399  | 4,808  | 10,456 | 15,561 | 15,055 | 8,683  | 38,050 | 14,924 |
| MCE-MIR_3190:rev  | 11,748 | 15,806 | 12,766 | 20,403 | 24,699 | 23,280 | 22,482 | 28,790 | 17,183 |
| S-mmu-mir-328     | 11,472 | 19,258 |        | 23,312 | 19,884 | 28,339 | 22,008 | 22,219 | 12,327 |
| MCE-MIR_3782:rev  | 11,471 | 6,376  | 10,358 | 17,337 | 23,885 | 25,143 | 16,767 | 20,503 | 25,698 |
| MCE-MIR_1457:rev  | 11,370 | 15,762 | 15,240 | 24,110 | 26,276 | 28,525 | 25,587 | 25,841 | 16,178 |
| mmu-mir-17-5p     | 11,254 | 16,818 | 13,471 | 14,562 | 14,218 | 9,820  | 13,845 | 21,240 | 8,732  |
| MCE-MIR_984:rev   | 10,959 | 8,066  | 11,145 | 14,467 | 19,901 | 21,454 | 17,238 | 19,510 | 17,075 |
| MCE-MIR_3111: fwd | 10,862 | 14,272 | 16,861 | 22,772 | 19,404 | 14,179 | 23,128 | 11,735 | 5,464  |
| MCE-MIR_3468:rev  | 10,858 | 9,910  | 10,261 | 16,789 | 21,853 | 23,913 | 18,236 | 24,365 | 22,871 |
| MCE-MIR_3495:rev  | 10,577 | 2,549  | 3,538  | 8,723  | 14,242 | 14,785 | 7,141  | 13,950 | 15,571 |
| MCE-MIR_3502:rev  | 10,401 | 7,601  | 9,112  | 13,539 | 18,010 | 19,407 | 17,551 | 23,371 | 14,312 |
| MCE-MIR_3503:rev  | 10,335 | 7,723  | 13,858 | 17,026 | 25,265 | 24,519 | 18,962 | 21,099 | 20,262 |
| MCE-MIR_2953: fwd | 10,278 | 9,844  | 7,667  | 10,992 | 19,761 | 15,094 | 19,153 | 26,184 | 7,959  |
| MCE-MIR_2222: fwd | 10,118 | 7,347  | 7,729  | 17,212 | 22,763 | 19,013 | 14,656 | 14,795 | 9,315  |
| MCE-MIR_5367:rev  | 9,658  | 6,429  | 8,312  | 14,904 | 20,132 | 20,028 | 13,700 | 17,282 | 17,564 |
| MCE-MIR_254: fwd  | 9,561  | 10,946 | 9,998  | 15,651 | 17,475 | 21,199 | 17,484 | 17,883 | 9,774  |
| MCE-MIR_995:rev   | 9,519  | 6,833  | 10,387 | 13,539 | 16,979 | 20,750 | 16,125 | 16,262 | 11,035 |
| cand595:b         | 9,466  | 12,875 | 14,394 | 19,481 | 18,960 | 27,656 | 17,790 | 21,246 | 14,434 |
| mmu-mir-20a       | 9,268  | 16,654 | 11,786 | 13,136 | 12,555 | 9,253  | 12,037 | 19,404 | 7,182  |
| MCE-MIR_5699: fwd | 9,212  | 9,536  | 9,447  | 17,501 | 11,495 | 17,484 | 14,682 | 14,430 | 1,653  |
| mmu-mir-291a-3p   | 8,958  | 15,451 | 15,238 | 20,691 | 5,145  | 4,393  | 2,186  | 1,470  | 254    |
| cand78:b          | 8,864  | 6,447  | 6,705  | 13,230 | 19,052 | 18,808 | 14,898 | 18,423 | 14,040 |
| MCE-MIR_4861: fwd | 8,752  | 11,332 | 9,165  | 19,552 | 18,340 | 22,489 | 18,628 | 16,731 | 7,880  |

| ES Time:          | Day 0 |        | Day 1  |        | Day 3  |        |        | Day 6  |        |
|-------------------|-------|--------|--------|--------|--------|--------|--------|--------|--------|
| Array Chip ID:    | 210   | 357    | 124    | 216    | 217    | 222    | 356    | 222    | 245    |
| mmu-mir-19b       | 8,720 | 6,321  | 2,749  | 12,949 | 8,941  | 7,105  | 764    | 9,213  | 2,535  |
| MCE-MIR_2164:rev  | 8,715 | 7,160  | 7,876  | 14,401 | 16,052 | 19,328 | 17,637 | 18,432 | 11,921 |
| MCE-MIR_2171:rev  | 8,704 | 2,662  | 6,058  | 6,701  | 17,168 | 12,775 | 12,698 | 23,740 | 14,721 |
| MCE-MIR_4226: fwd | 8,640 | 12,036 | 9,954  | 12,744 | 24,360 | 18,442 | 21,375 | 19,446 | 6,746  |
| cand489           | 8,525 | 4,961  | 9,056  | 14,354 | 23,547 | 19,974 | 15,699 | 18,988 | 18,813 |
| MCE-MIR_1538: fwd | 8,494 | 6,517  | 12,597 | 17,318 | 17,623 | 24,926 | 13,626 | 20,618 | 8,531  |
| cand11:b          | 8,395 | 7,785  | 8,872  | 12,906 | 16,007 | 15,063 | 14,045 | 13,726 | 9,654  |
| cand186           | 8,154 | 10,547 | 9,436  | 15,484 | 21,098 | 22,669 | 16,000 | 17,622 | 17,867 |
| cand692:b         | 8,032 | 5,535  | 6,533  | 11,982 | 17,989 | 17,996 | 14,090 | 14,392 | 13,873 |
| MCE-MIR_5374: fwd | 7,939 | 991    | 2,837  | 6,138  | 15,414 | 17,544 | 7,172  | 17,028 | 5,621  |
| mmu-mir-21        | 7,922 | 16,753 | 10,859 | 7,440  | 17,111 | 10,183 | 18,695 | 19,232 | 6,139  |
| cand255           | 7,907 | 6,044  | 9,673  | 15,094 | 29,910 | 20,470 | 17,170 | 13,394 | 7,973  |
| S-mmu-mir-484     | 7,885 | 4,950  |        | 13,059 | 16,738 | 21,478 | 11,103 | 17,929 | 18,576 |
| cand68            | 7,726 | 1,137  | 3,974  | 7,416  | 20,907 | 12,190 | 12,299 | 23,240 | 15,290 |
| MCE-MIR_968: fwd  | 7,656 | 13,678 | 9,700  | 15,734 | 16,378 | 19,273 | 17,467 | 16,754 | 10,171 |
| mmu-mir-25        | 7,651 | 14,889 | 10,213 | 9,736  | 8,230  | 6,282  | 8,828  | 12,867 | 4,673  |
| cand306           | 7,538 | 7,782  | 7,793  | 14,222 | 18,216 | 20,822 | 19,823 | 22,936 | 15,505 |
| MCE-MIR_4673: fwd | 7,302 | 11,583 | 12,156 | 16,567 | 10,856 | 9,462  | 20,149 | 7,325  | 2,243  |
| MCE-MIR_2388: rev | 7,277 | 5,507  | 7,399  | 14,683 | 24,066 | 20,015 | 14,845 | 20,419 | 11,346 |
| MCE-MIR_2999: fwd | 7,255 | 15,314 | 6,230  | 14,286 | 15,799 | 15,030 | 21,329 | 10,034 | 1,852  |
| MIR112            | 7,220 | 4,720  | 5,812  | 13,570 | 17,277 | 17,199 | 13,238 | 13,178 | 10,960 |
| MIR216            | 6,914 | 11,073 | 7,831  | 10,485 | 6,568  | 5,723  | 8,160  | 9,833  | 1,840  |
| MCE-MIR_5195: rev | 6,842 | 5,413  | 7,151  | 12,619 | 16,274 | 19,385 | 18,040 | 15,098 | 10,952 |
| MCE-MIR_5005: rev | 6,687 | 7,033  | 7,787  | 13,095 | 19,765 | 16,103 | 17,144 | 15,869 | 6,841  |
| MCE-MIR_1535: rev | 6,641 | 3,252  | 6,177  | 10,075 | 16,606 | 18,834 | 11,185 | 15,424 | 13,929 |
| cand647           | 6,634 | 8,158  | 6,133  | 9,142  | 4,845  | 2,977  | 5,008  | 4,450  | 1,073  |
| mmu-mir-20b       | 6,570 | 12,469 | 8,705  | 11,529 | 8,165  | 6,134  | 7,999  | 10,662 | 1,962  |
| mmu-mir-302d      | 6,468 | 13,090 | 7,596  | 7,927  | 237    | 131    | 383    | 868    | 189    |
| MCE-MIR_2337: fwd | 6,455 | 7,441  | 7,531  | 11,712 | 11,148 | 11,515 | 12,286 | 10,428 | 2,117  |
| MCE-MIR_3491: rev | 6,403 | 4,686  | 7,001  | 13,820 | 17,079 | 17,533 | 15,210 | 14,636 | 10,230 |
| MCE-MIR_3155: fwd | 6,336 | 9,335  | 10,968 | 13,492 | 19,156 | 13,443 | 19,552 | 13,913 | 5,505  |
| MCE-MIR_3686: fwd | 6,307 | 1,883  | 4,576  | 11,018 | 12,759 | 15,088 | 6,456  | 11,777 | 8,119  |
| cand341           | 6,276 | 4,311  | 2,181  | 11,292 | 4,211  | 5,181  | 479    | 5,614  | 854    |
| MIR70             | 6,264 | 11,984 | 7,419  | 7,619  | 190    | 82     | 284    | 670    | 146    |
| MCE-MIR_5606: fwd | 6,245 | 4,863  | 5,842  | 10,942 | 13,781 | 13,709 | 11,972 | 11,602 | 4,753  |
| mmu-mir-106a      | 6,224 | 11,598 | 7,489  | 10,346 | 7,732  | 6,182  | 8,142  | 12,559 | 1,809  |
| MCE-MIR_136: fwd  | 6,176 | 6,579  | 6,648  | 12,123 | 15,196 | 15,306 | 14,098 | 12,506 | 4,812  |
| MCE-MIR_4661: fwd | 6,086 | 9,386  | 7,158  | 17,577 | 9,225  | 15,561 | 14,902 | 12,372 | 1,580  |

| ES Time:          | Day 0 |        | Day 1 |        | Day 3  |        |        | Day 6  |        |
|-------------------|-------|--------|-------|--------|--------|--------|--------|--------|--------|
| Array Chip ID:    | 210   | 357    | 124   | 216    | 217    | 222    | 356    | 222    | 245    |
| MCE-MIR_1038: fwd | 6,061 | 2,385  | 4,618 | 9,157  | 14,822 | 17,156 | 7,983  | 16,519 | 13,012 |
| MCE-MIR_5061: rev | 6,039 | 4,392  | 4,620 | 9,155  | 13,549 | 12,807 | 11,455 | 8,722  | 8,124  |
| MCE-MIR_783: rev  | 6,037 | 4,576  | 6,640 | 10,672 | 13,081 | 13,847 | 13,264 | 10,763 | 2,725  |
| MCE-MIR_4854: rev | 6,024 | 9,467  | 4,975 | 14,875 | 9,426  | 13,762 | 16,999 | 12,004 | 413    |
| MCE-MIR_822: fwd  | 6,012 | 4,550  | 5,357 | 12,606 | 11,125 | 14,892 | 12,254 | 10,681 | 1,289  |
| MCE-MIR_645: fwd  | 5,976 | 6,667  | 6,181 | 14,990 | 14,281 | 18,964 | 14,778 | 14,573 | 4,891  |
| mmu-mir-92        | 5,877 | 12,182 | 7,528 | 9,114  | 5,434  | 4,141  | 7,981  | 5,888  | 1,341  |
| MCE-MIR_3543: rev | 5,869 | 6,107  | 4,211 | 9,844  | 11,054 | 11,933 | 15,290 | 15,258 | 1,258  |
| MCE-MIR_1409: fwd | 5,795 | 2,548  | 6,297 | 8,146  | 16,554 | 14,216 | 12,468 | 12,482 | 6,788  |
| MIR88             | 5,766 | 3,719  | 5,371 | 13,393 | 15,327 | 18,362 | 10,033 | 15,840 | 13,621 |
| MCE-MIR_2310: rev | 5,735 | 6,587  | 4,281 | 11,623 | 13,665 | 13,324 | 13,209 | 6,566  | 1,285  |
| MCE-MIR_1504: rev | 5,652 | 5,042  | 5,845 | 11,664 | 15,231 | 15,906 | 12,524 | 14,282 | 5,508  |
| MCE-MIR_3295: rev | 5,607 | 2,418  | 5,620 | 7,951  | 15,024 | 13,353 | 11,048 | 10,920 | 6,411  |
| S-mmu-mir-346     | 5,591 | 6,710  |       | 13,353 | 15,823 | 14,360 | 14,155 | 13,485 | 2,563  |
| MCE-MIR_3751: fwd | 5,525 | 2,537  | 2,480 | 12,324 | 12,253 | 10,199 | 5,908  | 19,543 | 4,655  |
| MCE-MIR_321: rev  | 5,513 | 7,920  | 3,262 | 13,990 | 18,687 | 19,560 | 19,887 | 18,382 | 1,821  |
| MIR136            | 5,445 | 10,660 | 6,845 | 10,520 | 4,577  | 4,245  | 8,043  | 6,355  | 1,234  |
| MCE-MIR_135: fwd  | 5,367 | 3,760  | 5,839 | 9,830  | 15,375 | 13,742 | 11,705 | 10,520 | 2,796  |
| mmu-mir-16        | 5,265 | 9,161  | 7,038 | 5,060  | 9,363  | 7,083  | 6,089  | 8,443  | 4,391  |
| cand371: a        | 5,251 | 2,050  | 3,037 | 9,013  | 17,065 | 15,821 | 12,822 | 14,987 | 14,695 |
| MCE-MIR_335: fwd  | 5,193 | 2,618  | 5,572 | 8,855  | 15,367 | 13,051 | 11,189 | 12,781 | 6,455  |
| cand667: a        | 4,964 | 4,467  | 5,475 | 11,961 | 11,406 | 16,420 | 10,987 | 13,204 | 4,493  |
| MCE-MIR_4625: fwd | 4,849 | 5,397  | 5,798 | 11,278 | 11,077 | 14,901 | 12,509 | 12,386 | 4,617  |
| MCE-MIR_2243: fwd | 4,826 | 2,438  | 2,852 | 9,803  | 11,079 | 13,394 | 10,367 | 10,215 | 10,935 |
| mmu-mir-127       | 4,815 | 6,465  | 2,886 | 4,638  | 9,167  | 5,620  | 7,185  | 15,685 | 5,988  |
| cand342: a        | 4,654 | 10,838 | 6,965 | 9,226  | 3,247  | 4,191  | 6,710  | 5,221  | 1,054  |
| MCE-MIR_1190: fwd | 4,546 | 5,809  | 5,536 | 12,299 | 11,817 | 14,968 | 11,588 | 13,377 | 4,394  |
| MCE-MIR_3147: fwd | 4,544 | 2,744  | 4,000 | 8,098  | 12,233 | 13,856 | 8,784  | 12,380 | 8,351  |
| mmu-mir-182       | 4,515 | 7,665  | 5,174 | 6,661  | 3,163  | 2,280  | 3,390  | 2,580  | 401    |
| mmu-mir-341       | 4,512 | 3,363  | 1,595 | 3,506  | 3,827  | 2,518  | 4,603  | 5,953  | 1,236  |
| mmu-mir-130a      | 4,496 | 4,732  | 2,420 | 7,028  | 4,632  | 4,075  | 1,876  | 7,561  | 3,120  |
| MCE-MIR_5089: fwd | 4,493 | 7,570  | 4,439 | 11,986 | 13,906 | 12,664 | 18,030 | 11,264 | 2,314  |
| cand172: b        | 4,419 | 11,621 | 6,292 | 7,699  | 3,134  | 3,641  | 6,518  | 5,343  | 1,171  |
| mmu-mir-183       | 4,359 | 7,680  | 4,566 | 6,222  | 3,898  | 2,650  | 4,185  | 4,012  | 704    |
| MCE-MIR_5109: rev | 4,333 | 3,174  | 5,000 | 7,517  | 11,130 | 15,235 | 7,580  | 11,347 | 9,590  |
| MCE-MIR_3837: rev | 4,316 | 5,217  | 2,972 | 13,220 | 11,765 | 12,775 | 16,971 | 11,656 | 849    |
| S-mmu-mir-365-1   | 4,260 | 6,816  |       | 12,830 | 12,033 | 20,446 | 11,107 | 11,436 | 5,672  |
| S-mmu-mir-211     | 4,250 | 2,442  |       | 8,892  | 11,584 | 11,798 | 11,348 | 9,881  | 7,565  |

| ES Time:          | Day 0 |        | Day 1 |        | Day 3  |        |        | Day 6  |        |
|-------------------|-------|--------|-------|--------|--------|--------|--------|--------|--------|
| Array Chip ID:    | 210   | 357    | 124   | 216    | 217    | 222    | 356    | 222    | 245    |
| mmu-mir-541       | 4,228 | 6,897  | 3,117 | 4,217  | 5,487  | 4,036  | 6,075  | 10,368 | 3,246  |
| MCE-MIR_2169:rev  | 4,076 | 5,795  | 3,024 | 11,033 | 8,625  | 13,299 | 10,136 | 11,203 | 4,665  |
| cand648           | 4,036 | 10,347 | 7,146 | 15,023 | 12,034 | 17,200 | 16,994 | 10,629 | 667    |
| MCE-MIR_5172: fwd | 4,004 | 333    | 920   | 4,724  | 18,377 | 15,607 | 3,975  | 14,093 | 16,445 |
| MCE-MIR_3595: fwd | 3,999 | 2,349  | 2,482 | 7,180  | 6,989  | 11,703 | 5,728  | 9,818  | 6,393  |
| cand252           | 3,967 | 4,813  | 4,710 | 5,279  | 6,115  | 4,221  | 4,715  | 9,449  | 1,732  |
| mmu-mir-26a       | 3,948 | 7,877  | 8,398 | 2,592  | 12,746 | 7,009  | 11,159 | 24,609 | 13,708 |
| MIR61             | 3,936 | 3,950  | 3,974 | 11,513 | 17,337 | 9,263  | 17,532 | 8,738  | 320    |
| mmu-mir-93        | 3,895 | 6,697  | 4,231 | 5,819  | 6,715  | 4,607  | 6,275  | 9,711  | 4,127  |
| MCE-MIR_5544: rev | 3,822 | 6,779  | 2,257 | 10,956 | 4,430  | 12,233 | 12,052 | 9,063  | 644    |
| cand279: b        | 3,817 | 2,402  | 3,358 | 6,033  | 11,755 | 10,994 | 9,791  | 7,852  | 5,520  |
| MCE-MIR_4820: rev | 3,804 | 3,451  | 7,426 | 7,837  | 14,345 | 19,717 | 6,419  | 6,870  | 8,523  |
| MCE-MIR_4821: rev | 3,767 | 3,677  | 7,484 | 8,212  | 13,899 | 19,640 | 6,008  | 6,972  | 7,900  |
| mmu-mir-320       | 3,762 | 5,054  | 4,438 | 7,326  | 9,003  | 10,379 | 7,550  | 10,769 | 5,455  |
| cand616: a        | 3,762 | 2,403  | 2,095 | 8,605  | 19,379 | 14,382 | 9,023  | 11,524 | 9,651  |
| MCE-MIR_810: rev  | 3,760 | 5,869  | 982   | 4,635  | 1,531  | 1,136  | 2,224  | 2,077  | 251    |
| mmu-mir-106b      | 3,756 | 5,579  | 3,705 | 5,639  | 5,510  | 4,370  | 3,968  | 8,715  | 2,694  |
| MCE-MIR_3416: rev | 3,577 | 2,064  | 2,691 | 9,039  | 11,804 | 14,417 | 8,123  | 11,362 | 8,546  |
| MCE-MIR_1506: rev | 3,570 | 2,919  | 4,638 | 7,724  | 13,606 | 11,685 | 12,909 | 10,773 | 4,381  |
| MCE-MIR_3485: rev | 3,569 | 3,053  | 2,605 | 9,321  | 8,434  | 12,110 | 10,219 | 9,116  | 3,861  |
| mmu-mir-291b-5p   | 3,527 | 7,567  | 3,190 | 7,496  | 1,211  | 984    | 1,176  | 307    | 120    |
| mmu-mir-191       | 3,517 | 6,528  | 3,626 | 3,570  | 3,322  | 2,597  | 3,629  | 7,257  | 1,734  |
| MCE-MIR_4945: fwd | 3,424 | 503    | 1,651 | 6,182  | 11,279 | 11,796 | 5,029  | 8,246  | 6,282  |
| MIR207            | 3,411 | 4,917  | 2,782 | 7,634  | 9,022  | 14,471 | 10,588 | 9,898  | 6,040  |
| MCE-MIR_5403: fwd | 3,386 | 4,868  | 3,172 | 8,872  | 7,225  | 12,538 | 10,900 | 7,795  | 485    |
| cand718: b        | 3,375 | 896    | 1,846 | 5,357  | 12,367 | 9,660  | 8,081  | 12,633 | 4,713  |
| mmu-mir-130b      | 3,269 | 3,579  | 1,922 | 4,340  | 2,895  | 2,599  | 1,386  | 8,038  | 3,279  |
| cand231           | 3,185 | 1,292  |       | 5,269  | 13,609 | 10,905 | 8,679  | 11,998 | 9,412  |
| MCE-MIR_3847: fwd | 3,161 | 5,320  | 3,249 | 8,626  | 8,897  | 8,528  | 10,553 | 3,230  | 614    |
| cand613           | 3,160 | 2,905  | 3,925 | 7,708  | 9,766  | 12,564 | 7,005  | 9,270  | 5,259  |
| MCE-MIR_4297: fwd | 2,986 | 3,952  | 2,365 | 8,709  | 9,771  | 13,804 | 9,414  | 11,890 | 6,217  |
| cand79            | 2,972 | 2,087  | 2,872 | 5,179  | 14,308 | 11,752 | 7,995  | 7,483  | 2,890  |
| MCE-MIR_3334: fwd | 2,927 | 2,171  | 2,727 | 7,688  | 7,885  | 10,390 | 10,311 | 8,646  | 1,165  |
| mmu-mir-103       | 2,904 | 4,529  | 3,307 | 4,077  | 5,190  | 4,741  | 3,647  | 10,206 | 3,845  |
| mmu-mir-23a       | 2,893 | 6,214  | 3,862 | 3,672  | 3,594  | 2,579  | 5,215  | 5,434  | 1,051  |
| MCE-MIR_4743: fwd | 2,806 | 5,425  | 1,973 | 10,658 | 5,434  | 12,048 | 7,555  | 6,950  | 1,112  |
| mmu-mir-15b       | 2,785 | 5,245  | 3,046 | 4,631  | 4,650  | 3,089  | 6,000  | 6,741  | 1,363  |
| mmu-mir-23b       | 2,780 | 5,928  | 3,723 | 3,215  | 4,023  | 2,692  | 5,285  | 9,546  | 3,265  |

| ES Time:          | Day 0 |        | Day 1 |        | Day 3  |        |        | Day 6  |        |
|-------------------|-------|--------|-------|--------|--------|--------|--------|--------|--------|
| Array Chip ID:    | 210   | 357    | 124   | 216    | 217    | 222    | 356    | 222    | 245    |
| MCE-MIR_3490:rev  | 2,751 | 927    | 3,083 | 6,419  | 11,159 | 10,710 | 8,109  | 8,067  | 5,157  |
| mmu-mir-302b      | 2,751 | 10,251 | 2,941 | 4,779  | 24     |        | 91     | 215    | 22     |
| cand564:b         | 2,668 | 3,516  | 1,700 | 3,069  | 4,740  | 3,915  | 3,826  | 9,651  | 2,419  |
| cand324:a         | 2,655 | 4,271  | 3,881 | 4,164  | 1,172  | 1,680  | 2,052  | 1,351  | 151    |
| mmu-mir-379       | 2,652 | 4,278  | 2,792 | 3,457  | 5,874  | 3,820  | 4,849  | 11,601 | 3,523  |
| MCE-MIR_3470:rev  | 2,647 | 1,644  | 1,609 | 5,214  | 7,993  | 9,759  | 6,941  | 8,649  | 5,902  |
| mmu-mir-291a-5p   | 2,625 | 5,939  | 2,148 | 5,846  | 604    | 454    | 691    | 119    | 23     |
| MCE-MIR_1792:rev  | 2,617 | 6,974  | 2,068 | 10,646 | 8,821  | 11,117 | 18,483 | 9,006  | 856    |
| mmu-mir-24        | 2,609 | 4,305  | 2,963 | 2,595  | 3,856  | 2,776  | 2,523  | 6,392  | 2,811  |
| cand178:a         | 2,593 | 4,778  | 2,489 | 12,626 | 8,126  | 9,066  | 16,415 | 6,566  | 430    |
| MCE-MIR_1365: fwd | 2,588 | 478    | 1,601 | 4,200  | 11,942 | 11,360 | 4,942  | 8,161  | 9,726  |
| S-mmu-mir-293     | 2,569 | 804    |       | 7,031  | 268    | 118    |        |        |        |
| MCE-MIR_3609:rev  | 2,550 | 926    | 1,736 | 4,240  | 5,486  | 6,719  | 5,942  | 4,157  | 1,329  |
| S-mmu-mir-21      | 2,537 | 669    |       | 4,146  | 12,922 | 10,026 | 13,205 | 5,087  | 1,534  |
| S-mmu-mir-365-2   | 2,532 | 4,698  |       | 9,855  | 9,737  | 18,109 | 8,704  | 7,071  | 2,933  |
| cand708:b         | 2,512 | 4,297  | 6,148 | 8,492  | 7,629  | 16,084 | 7,749  | 7,510  | 2,192  |
| MCE-MIR_5192:rev  | 2,512 | 2,355  | 2,443 | 7,642  | 10,513 | 11,339 | 9,703  | 7,635  | 2,773  |
| MCE-MIR_5389: fwd | 2,429 | 4,009  | 2,500 | 6,395  | 5,981  | 6,940  | 7,757  | 2,194  | 410    |
| MCE-MIR_5030:rev  | 2,407 | 4,013  | 726   | 10,012 | 7,350  | 10,868 | 10,197 | 6,876  | 401    |
| mmu-mir-494       | 2,398 | 680    | 446   | 3,368  | 2,632  | 1,819  | 4,062  | 1,707  | 122    |
| S-mmu-mir-150     | 2,379 | 2,606  |       | 5,938  | 7,476  | 14,664 | 6,237  | 7,559  | 7,525  |
| mmu-mir-30c       | 2,347 | 5,922  | 4,326 | 2,266  | 4,850  | 3,745  | 6,041  | 10,267 | 2,720  |
| S-mmu-mir-326     | 2,298 | 6,589  |       | 10,113 | 5,981  | 12,959 | 10,882 | 8,150  | 1,201  |
| cand116           | 2,290 | 1,879  | 2,855 | 8,795  | 8,690  | 10,128 | 9,190  | 8,760  | 2,253  |
| MIR165            | 2,281 | 1,391  | 2,347 | 5,538  | 7,945  | 9,236  | 5,784  | 7,485  | 4,797  |
| S-mmu-mir-295     | 2,279 | 2,148  |       | 4,092  | 918    | 955    | 405    | 244    | 51     |
| MCE-MIR_3642:rev  | 2,272 | 2,431  | 1,516 | 4,734  | 4,152  | 7,592  | 5,989  | 5,179  | 1,103  |
| MCE-MIR_3529:rev  | 2,254 | 6,049  | 744   | 4,297  | 8,886  | 8,926  | 15,113 | 11,021 | 710    |
| mmu-mir-134       | 2,249 | 2,456  | 1,598 | 2,432  | 6,732  | 5,750  | 5,477  | 8,318  | 4,475  |
| cand523           | 2,223 | 3,494  | 3,426 | 9,234  | 4,512  | 12,825 | 8,681  | 11,541 | 907    |
| MCE-MIR_6054:rev  | 2,175 | 1,161  | 452   | 2,087  | 2,450  | 1,886  | 2,821  | 2,921  | 893    |
| MCE-MIR_4462: fwd | 2,135 | 1,067  | 2,227 | 5,079  | 8,356  | 9,981  | 5,690  | 7,978  | 5,281  |
| MCE-MIR_1778: fwd | 2,098 | 926    | 1,235 | 4,927  | 9,094  | 9,648  | 6,527  | 10,232 | 1,631  |
| cand91:a          | 2,094 | 288    | 494   | 2,788  | 14,153 | 9,091  | 6,772  | 6,395  | 3,521  |
| S-mmu-mir-296     | 2,083 | 2,055  |       | 4,320  | 3,558  | 5,763  | 4,500  | 7,127  | 1,536  |
| cand156           | 2,053 | 8,005  | 4,407 | 13,992 | 1,045  | 4,184  | 14,237 | 2,406  | 132    |
| MCE-MIR_3573:rev  | 2,052 | 261    | 674   | 3,126  | 11,049 | 7,029  | 2,035  | 4,488  | 10,996 |
| mmu-mir-107       | 2,012 | 3,436  | 2,170 | 3,239  | 3,697  | 3,594  | 2,885  | 7,473  | 2,321  |

| ES Time:          | Day 0 |       | Day 1 |       | Day 3  |        |        | Day 6  |       |
|-------------------|-------|-------|-------|-------|--------|--------|--------|--------|-------|
| Array Chip ID:    | 210   | 357   | 124   | 216   | 217    | 222    | 356    | 222    | 245   |
| MCE-MIR_3488:rev  | 2,010 | 941   | 1,270 | 4,614 | 7,199  | 8,443  | 7,801  | 5,020  | 2,905 |
| MCE-MIR_5291: fwd | 2,005 | 6,036 | 2,557 | 9,144 | 3,315  | 9,493  | 11,795 | 5,340  | 212   |
| MCE-MIR_5440: fwd | 2,003 | 3,479 | 1,633 | 6,874 | 5,104  | 8,230  | 9,836  | 5,103  | 434   |
| mmu-mir-7         | 1,999 | 5,219 | 2,810 | 3,264 | 1,261  | 982    | 2,328  | 636    | 114   |
| MCE-MIR_5079: rev | 1,986 | 904   | 977   | 4,858 | 8,089  | 9,972  | 3,880  | 7,018  | 6,065 |
| MCE-MIR_3134: rev | 1,948 | 7,151 | 1,070 | 5,054 | 8,316  | 8,178  | 14,820 | 5,340  | 255   |
| cand279: a        | 1,924 | 792   | 784   | 4,332 | 8,251  | 6,848  | 5,435  | 3,204  | 2,137 |
| mmu-mir-200b      | 1,917 | 4,187 | 2,829 | 3,002 | 2,769  | 2,259  | 3,335  | 3,065  | 875   |
| MCE-MIR_5152: rev | 1,899 | 2,464 | 1,752 | 4,983 | 6,118  | 7,861  | 8,135  | 4,001  | 347   |
| MCE-MIR_2139: fwd | 1,844 | 752   | 1,195 | 4,161 | 8,403  | 11,427 | 2,089  | 7,173  | 8,937 |
| MCE-MIR_3513: rev | 1,834 | 2,927 | 3,450 | 6,702 | 7,099  | 5,753  | 8,132  | 2,029  | 593   |
| cand465: a        | 1,822 | 6,049 | 2,508 | 4,091 | 53     | 50     | 172    | 219    | 27    |
| MCE-MIR_1371: fwd | 1,817 | 882   | 1,646 | 3,877 | 10,532 | 8,730  | 6,450  | 4,950  | 1,791 |
| cand362           | 1,807 | 1,515 | 898   | 5,331 | 4,331  | 8,494  | 8,474  | 7,998  | 354   |
| MCE-MIR_3762: rev | 1,791 | 780   | 3,056 | 5,165 | 10,088 | 14,121 | 3,806  | 4,308  | 5,234 |
| MCE-MIR_2327: fwd | 1,765 | 443   | 834   | 6,571 | 11,360 | 9,895  | 2,676  | 5,783  | 3,014 |
| cand686           | 1,727 | 821   | 1,080 | 1,167 | 3,808  | 3,102  | 2,065  | 4,314  | 2,935 |
| MCE-MIR_5399: fwd | 1,701 | 1,166 | 957   | 3,941 | 5,796  | 8,683  | 3,063  | 7,040  | 3,876 |
| cand284: a        | 1,699 | 1,966 | 1,908 | 1,580 | 3,080  | 2,641  | 1,845  | 4,943  | 1,268 |
| MCE-MIR_2817: fwd | 1,662 | 517   | 1,804 | 2,037 | 10,440 | 8,222  | 4,388  | 8,621  | 3,541 |
| MCE-MIR_4273: fwd | 1,641 | 843   | 816   | 3,693 | 9,999  | 12,727 | 9,827  | 8,968  | 6,399 |
| MCE-MIR_1734: fwd | 1,624 | 1,646 | 2,050 | 3,383 | 7,243  | 7,933  | 8,171  | 4,708  | 508   |
| MCE-MIR_1325: rev | 1,622 | 905   | 1,803 | 4,266 | 7,161  | 8,037  | 5,306  | 6,037  | 1,350 |
| MCE-MIR_451: rev  | 1,621 | 671   | 580   | 2,428 | 2,391  | 2,796  | 935    | 1,245  | 110   |
| mmu-mir-376b      | 1,560 | 3,126 | 2,010 | 3,582 | 4,231  | 3,348  | 2,605  | 3,318  | 707   |
| MCE-MIR_4684: fwd | 1,552 | 678   | 801   | 4,132 | 5,747  | 7,751  | 4,508  | 3,663  | 1,449 |
| MCE-MIR_3143: fwd | 1,543 | 1,474 | 1,235 | 4,753 | 5,024  | 7,328  | 5,829  | 4,415  | 1,205 |
| cand425           | 1,543 | 1,176 | 1,201 | 4,214 | 2,697  | 7,993  | 3,212  | 5,339  | 923   |
| MCE-MIR_1784: fwd | 1,542 | 5,187 | 1,734 | 7,672 | 6,251  | 7,295  | 9,735  | 2,754  | 152   |
| MIR30             | 1,526 | 5,833 | 1,753 | 5,077 | 1,235  | 1,249  | 4,819  | 1,719  | 199   |
| MCE-MIR_5057: fwd | 1,500 | 2,061 | 554   | 9,008 | 4,426  | 8,039  | 6,547  | 4,776  | 190   |
| MCE-MIR_3484: rev | 1,460 | 856   | 1,499 | 4,503 | 6,498  | 7,385  | 5,551  | 5,531  | 3,958 |
| MCE-MIR_2698: rev | 1,455 | 407   | 966   | 2,690 | 6,423  | 8,849  | 2,628  | 7,233  | 5,700 |
| S-mmu-mir-294     | 1,454 | 3,032 |       | 3,823 | 237    | 133    | 266    | 32     |       |
| MCE-MIR_755: fwd  | 1,446 | 305   | 395   | 3,791 | 7,063  | 8,725  | 2,911  | 5,630  | 6,427 |
| mmu-mir-382       | 1,437 | 2,641 | 1,279 | 2,068 | 4,336  | 2,880  | 4,884  | 10,329 | 2,708 |
| MCE-MIR_3685: rev | 1,432 | 1,042 | 312   | 3,368 | 4,490  | 6,197  | 2,963  | 3,182  | 619   |
| mmu-mir-210       | 1,421 | 1,837 | 982   | 3,476 | 547    | 549    | 247    | 2,419  | 846   |

| ES Time:          | Day 0 |       | Day 1 |       | Day 3  |        |       | Day 6  |       |
|-------------------|-------|-------|-------|-------|--------|--------|-------|--------|-------|
| Array Chip ID:    | 210   | 357   | 124   | 216   | 217    | 222    | 356   | 222    | 245   |
| mmu-mir-99b       | 1,406 | 1,792 | 1,991 | 2,405 | 6,221  | 4,143  | 5,548 | 11,269 | 3,846 |
| MCE-MIR_1352: fwd | 1,403 | 908   | 2,159 | 3,823 | 10,950 | 13,128 | 3,486 | 3,585  | 4,629 |
| cand268: b        | 1,385 | 2,011 | 1,216 | 1,818 | 834    | 634    | 687   | 1,125  | 303   |
| cand345           | 1,337 | 1,075 | 1,126 | 4,882 | 1,885  | 7,015  | 4,692 | 3,044  | 126   |
| cand268: a        | 1,302 | 74    | 401   | 1,780 | 15,208 | 7,172  | 5,248 | 12,050 | 4,838 |
| S-mmu-mir-467     | 1,291 | 4,073 |       | 4,716 | 875    | 679    | 2,056 | 502    | 110   |
| MCE-MIR_5014: fwd | 1,290 | 971   | 185   | 1,236 | 1,130  | 665    | 1,931 | 1,578  | 202   |
| MCE-MIR_4740: fwd | 1,283 | 2,140 | 1,559 | 4,510 | 3,124  | 2,750  | 4,349 | 692    | 202   |
| mmu-mir-466       | 1,282 | 5,479 | 3,117 | 5,302 | 2,032  | 1,786  | 2,591 | 1,219  | 203   |
| MCE-MIR_3859: fwd | 1,277 | 2,548 | 1,286 | 4,039 | 3,931  | 3,549  | 5,355 | 842    | 118   |
| mmu-mir-18        | 1,252 | 1,672 | 637   | 2,384 | 1,599  | 1,246  | 929   | 1,284  | 307   |
| mmu-mir-200c      | 1,242 | 2,556 | 1,491 | 1,655 | 1,482  | 1,100  | 1,941 | 2,818  | 851   |
| MCE-MIR_4922: fwd | 1,234 | 2,381 | 442   | 6,948 | 4,689  | 4,220  | 4,879 | 1,029  | 88    |
| MCE-MIR_4999: rev | 1,217 | 552   | 237   | 2,065 | 4,292  | 3,750  | 1,697 | 2,169  | 2,190 |
| mmu-mir-125a      | 1,208 | 2,413 | 2,257 | 2,331 | 4,394  | 3,626  | 5,277 | 13,248 | 5,302 |
| cand617           | 1,193 | 2,036 | 1,240 | 4,127 | 2,177  | 6,121  | 4,755 | 3,092  | 301   |
| cand135: b        | 1,181 | 843   | 942   | 3,399 | 4,159  | 3,454  | 1,896 | 4,731  | 1,233 |
| mmu-mir-361       | 1,153 | 2,363 | 1,681 | 1,950 | 2,374  | 1,926  | 2,217 | 3,750  | 1,422 |
| mmu-mir-19a       | 1,149 | 688   | 43    | 4,385 | 776    | 621    | 74    | 372    | 60    |
| mmu-mir-409       | 1,147 | 3,595 | 1,010 | 2,228 | 2,880  | 2,997  | 6,698 | 5,086  | 724   |
| mmu-mir-302       | 1,146 | 4,504 | 1,464 | 2,416 | 16     |        | 25    | 21     |       |
| MCE-MIR_1986: fwd | 1,137 | 711   | 644   | 4,841 | 7,151  | 6,792  | 5,472 | 3,194  | 639   |
| MCE-MIR_273: fwd  | 1,136 | 448   | 1,711 | 3,485 | 6,770  | 7,135  | 5,520 | 5,818  | 1,920 |
| MIR74             | 1,130 | 1,460 | 1,015 | 2,398 | 2,518  | 1,691  | 1,859 | 6,218  | 1,712 |
| MCE-MIR_3429: rev | 1,121 | 334   | 950   | 1,723 | 7,850  | 7,370  | 3,945 | 3,881  | 2,208 |
| MCE-MIR_2099: fwd | 1,071 | 765   | 1,221 | 4,231 | 4,828  | 6,670  | 1,938 | 3,272  | 461   |
| cand144: a        | 1,055 | 1,320 | 559   | 2,965 | 799    | 1,062  | 467   | 1,751  | 241   |
| mmu-mir-467       | 1,028 | 3,621 | 2,561 | 3,718 | 1,235  | 1,546  | 1,551 | 1,339  | 200   |
| mmu-mir-27b       | 1,021 | 2,683 | 1,211 | 1,778 | 1,532  | 994    | 1,408 | 4,252  | 991   |
| MCE-MIR_5607: rev | 997   | 580   | 402   | 6,811 | 6,276  | 4,168  | 3,514 | 1,201  | 43    |
| MCE-MIR_1536: rev | 997   | 568   | 1,023 | 4,315 | 7,856  | 6,827  | 3,903 | 2,508  | 2,240 |
| cand374: b        | 980   | 621   | 807   | 3,906 | 8,304  | 7,135  | 4,471 | 5,195  | 2,354 |
| cand314           | 947   | 1,564 | 1,165 | 1,260 | 1,769  | 1,738  | 1,729 | 3,560  | 909   |
| cand179: a        | 945   | 2,233 | 3,434 | 5,587 | 3,640  | 12,570 | 4,307 | 3,453  | 444   |
| cand137: a        | 939   | 1,086 | 1,150 | 1,466 | 2,049  | 1,823  | 867   | 3,323  | 693   |
| MCE-MIR_2977: rev | 933   | 694   | 67    | 4,046 | 4,599  | 4,085  | 5,355 | 2,291  | 463   |
| mmu-mir-433-3p    | 918   | 1,469 | 749   | 1,385 | 2,262  | 2,046  | 3,130 | 4,966  | 1,109 |
| S-mmu-mir-140     | 901   | 709   | 855   | 1,860 | 1,607  | 1,315  | 761   | 2,519  | 838   |



| ES Time:         | Day 0 |       | Day 1 |       | Day 3 |        |       | Day 6 |       |
|------------------|-------|-------|-------|-------|-------|--------|-------|-------|-------|
| Array Chip ID:   | 210   | 357   | 124   | 216   | 217   | 222    | 356   | 222   | 245   |
| S-mmu-mir-151    | 901   | 1,453 |       | 1,272 | 1,348 | 1,005  | 1,308 | 1,885 | 629   |
| MIR85            | 900   | 702   | 314   | 637   | 421   | 375    | 154   | 2,165 | 638   |
| cand699          | 892   | 335   | 827   | 1,898 | 5,083 | 5,891  | 2,678 | 3,965 | 2,038 |
| MCE-MIR_5141:rev | 873   | 1,520 | 330   | 7,420 | 4,119 | 8,376  | 3,848 | 3,410 | 275   |
| MIR124           | 872   | 1,568 | 570   | 2,831 | 2,624 | 2,016  | 1,628 | 3,540 | 682   |
| cand315:b        | 864   | 1,197 | 1,130 | 1,322 | 1,391 | 1,256  | 1,577 | 2,579 | 800   |
| MCE-MIR_3408:fwd | 848   | 551   | 243   | 3,047 | 2,947 | 3,953  | 2,477 | 2,381 | 1,159 |
| cand103:b        | 845   | 2,647 | 1,719 | 1,759 | 1,091 | 1,360  | 1,807 | 4,635 | 726   |
| MIR206           | 843   | 165   | 506   | 1,235 | 9,073 | 5,447  | 3,730 | 4,169 | 1,778 |
| MCE-MIR_3780:rev | 835   | 1,211 | 460   | 2,863 | 3,287 | 2,847  | 5,266 | 5,698 | 1,105 |
| MCE-MIR_4913:rev | 835   | 4,260 | 377   | 6,455 | 1,611 | 7,088  | 6,392 | 3,781 | 66    |
| S-mmu-mir-30c-1  | 830   | 4,518 |       | 4,889 | 894   | 5,751  | 8,358 | 2,530 | 67    |
| mmu-mir-434-3p   | 811   | 1,818 | 792   | 1,751 | 2,267 | 1,915  | 3,269 | 4,481 | 1,057 |
| MCE-MIR_3523:rev | 789   | 385   | 447   | 1,578 | 3,715 | 4,688  | 1,842 | 2,831 | 2,024 |
| cand588          | 766   | 260   | 198   | 2,478 | 8,027 | 4,600  | 1,929 | 3,090 | 1,888 |
| MCE-MIR_2714:rev | 761   | 404   | 1,135 | 2,736 | 6,140 | 6,211  | 6,080 | 4,287 | 356   |
| cand418          | 759   | 1,165 | 593   | 4,278 | 2,035 | 4,288  | 2,805 | 1,792 | 524   |
| mmu-mir-34a      | 742   | 876   | 455   | 1,601 | 1,287 | 1,100  | 657   | 1,122 | 206   |
| MCE-MIR_298:rev  | 717   | 543   | 488   | 2,638 | 6,948 | 5,961  | 6,041 | 2,194 | 625   |
| mmu-mir-195      | 703   | 2,263 | 794   | 1,566 | 737   | 507    | 1,232 | 307   | 70    |
| MCE-MIR_530:fwd  | 696   | 4,936 | 2,016 | 7,260 | 4,494 | 11,839 | 9,416 | 2,589 | 736   |
| S-mmu-mir-337    | 672   | 765   |       | 1,092 | 1,387 | 1,152  | 813   | 2,104 | 557   |
| MCE-MIR_1514:fwd | 668   | 759   | 334   | 2,848 | 2,392 | 3,377  | 2,102 | 1,208 | 174   |
| MIR202           | 654   | 1,253 | 353   | 1,474 | 1,416 | 1,478  | 1,302 | 1,553 | 317   |
| mmu-mir-298      | 651   | 1,564 | 471   | 2,357 | 1,347 | 2,091  | 2,042 | 2,761 | 355   |
| cand515          | 647   | 256   | 158   | 1,427 | 3,759 | 4,278  | 963   | 2,028 | 1,113 |
| cand467          | 626   | 895   | 280   | 3,721 | 1,383 | 2,257  | 2,092 | 1,194 | 43    |
| cand104:a        | 626   | 1,822 | 1,039 | 1,481 | 765   | 756    | 849   | 2,497 | 415   |
| S-mmu-mir-106b   | 617   | 800   |       | 1,256 | 756   | 718    | 740   | 1,298 | 288   |
| MCE-MIR_5354:rev | 615   | 1,411 | 94    | 3,191 | 2,368 | 2,298  | 2,682 | 1,227 | 456   |
| MCE-MIR_4627:fwd | 596   | 715   | 272   | 3,510 | 2,622 | 4,655  | 5,781 | 1,758 | 147   |
| mmu-mir-185      | 576   | 1,156 | 629   | 1,073 | 960   | 999    | 1,064 | 1,396 | 260   |
| MCE-MIR_5470:fwd | 576   | 1,480 | 210   | 2,813 | 991   | 1,258  | 2,702 | 341   | 41    |
| mmu-mir-543      | 571   | 1,240 | 331   | 1,234 | 1,419 | 1,371  | 1,140 | 1,258 | 328   |
| MCE-MIR_3685:fwd | 569   | 1,624 | 430   | 5,942 | 6,446 | 5,707  | 8,530 | 3,180 | 170   |
| MCE-MIR_2680:rev | 553   | 523   | 10    | 495   | 268   | 149    | 593   | 106   | 44    |
| mmu-mir-101b     | 550   | 580   | 178   | 1,217 | 544   | 495    | 172   | 457   | 94    |
| MIR253           | 549   | 1,078 | 224   | 1,443 | 677   | 551    | 646   | 629   | 145   |

| ES Time:          | Day 0 |       | Day 1 |       | Day 3 |       |       | Day 6  |       |
|-------------------|-------|-------|-------|-------|-------|-------|-------|--------|-------|
| Array Chip ID:    | 210   | 357   | 124   | 216   | 217   | 222   | 356   | 222    | 245   |
| mmu-mir-26b       | 545   | 1,829 | 1,156 | 1,145 | 2,942 | 2,167 | 3,624 | 8,356  | 2,478 |
| MCE-MIR_5443: fwd | 541   | 463   | 70    | 1,632 | 5,485 | 4,564 | 1,372 | 2,682  | 2,831 |
| cand545           | 539   | 577   | 210   | 3,092 | 3,888 | 8,117 | 2,219 | 3,542  | 317   |
| cand557           | 521   | 294   | 333   | 678   | 1,560 | 2,157 | 903   | 1,390  | 971   |
| MCE-MIR_534: fwd  | 507   | 1,305 |       | 2,580 | 816   | 2,836 | 9,241 | 1,535  | 35    |
| mmu-mir-329       | 505   | 1,370 | 361   | 1,254 | 1,475 | 1,428 | 1,171 | 4,098  | 814   |
| MCE-MIR_3531: rev | 503   | 275   | 562   | 2,135 | 3,846 | 4,030 | 3,667 | 2,941  | 1,237 |
| cand350           | 500   | 836   | 949   | 1,318 | 945   | 698   | 844   | 2,248  | 292   |
| mmu-mir-124a      | 496   | 461   | 124   | 456   | 233   | 223   | 99    | 1,229  | 342   |
| MCE-MIR_5056: rev | 490   | 241   | 85    | 912   | 2,269 | 1,572 | 712   | 404    | 250   |
| MCE-MIR_5384: rev | 484   | 780   | 421   | 2,500 | 2,140 | 3,968 | 3,973 | 1,835  | 64    |
| S-mmu-mir-204     | 481   | 762   |       | 2,058 | 1,288 | 2,156 | 6,542 | 606    | 77    |
| S-mmu-mir-378     | 474   | 411   |       | 594   | 357   | 349   | 181   | 1,012  | 436   |
| MCE-MIR_670: fwd  | 470   | 723   | 128   | 2,233 | 894   | 2,683 | 2,552 | 1,531  | 65    |
| cand276: a        | 467   | 441   | 358   | 959   | 623   | 607   | 357   | 658    | 112   |
| cand126           | 464   | 913   | 341   | 3,850 | 537   | 3,975 | 3,257 | 2,418  | 82    |
| cand457: a        | 451   | 436   | 296   | 2,086 | 402   | 1,971 | 1,020 | 887    | 82    |
| mmu-mir-30b       | 449   | 2,336 | 1,121 | 1,351 | 2,247 | 1,656 | 3,257 | 4,957  | 720   |
| mmu-mir-181b      | 443   | 982   | 425   | 1,372 | 4,042 | 2,942 | 3,616 | 11,012 | 3,975 |
| S-mmu-mir-483     | 441   | 414   |       | 974   | 874   | 2,071 | 1,120 | 1,978  | 1,478 |
| MCE-MIR_4714: rev | 441   | 619   | 70    | 6,471 | 5,906 | 5,398 | 4,244 | 1,170  | 49    |
| cand692: a        | 440   | 220   | 306   | 1,603 | 4,143 | 4,113 | 1,206 | 1,800  | 1,167 |
| MIR166            | 436   | 193   | 139   | 880   | 2,061 | 2,258 | 1,271 | 1,443  | 624   |
| MCE-MIR_6026: rev | 431   | 593   | 149   | 2,109 | 789   | 1,810 | 3,041 | 477    |       |
| MCE-MIR_1857: fwd | 420   | 173   | 248   | 1,462 | 2,611 | 2,730 | 4,338 | 701    | 22    |
| MCE-MIR_2745: fwd | 417   | 490   | 184   | 3,430 | 2,052 | 5,509 | 1,199 | 2,783  | 135   |
| cand73            | 417   | 264   | 37    | 1,195 | 810   | 1,773 | 531   | 315    | 140   |
| MCE-MIR_4027: rev | 413   | 268   | 285   | 911   | 1,650 | 2,412 | 755   | 1,215  | 991   |
| cand563           | 410   | 2,392 | 370   | 4,790 | 484   | 2,943 | 2,153 | 1,037  | 40    |
| cand572: a        | 405   | 182   | 137   | 1,447 | 1,655 | 3,956 | 684   | 1,691  | 223   |
| mmu-mir-342       | 395   | 1,002 | 483   | 1,037 | 1,315 | 1,236 | 2,164 | 3,178  | 712   |
| cand317           | 382   | 370   | 265   | 1,322 | 464   | 634   | 340   | 441    | 93    |
| MCE-MIR_3260: rev | 381   | 339   |       | 2,710 | 3,966 | 2,662 | 1,507 | 1,459  | 1,373 |
| cand24            | 381   | 279   | 254   | 804   | 1,107 | 3,409 | 596   | 841    | 563   |
| MCE-MIR_1973: fwd | 380   | 1,337 | 169   | 3,877 | 810   | 4,297 | 7,087 | 1,730  | 64    |
| mmu-mir-429       | 379   | 1,030 | 824   | 1,317 | 1,575 | 1,236 | 1,214 | 1,158  | 285   |
| MCE-MIR_4674: fwd | 378   | 341   | 170   | 1,176 | 5,551 | 5,273 | 8,084 | 2,445  | 703   |
| mmu-mir-148a      | 377   | 875   | 631   | 1,122 | 661   | 506   | 502   | 664    | 131   |

| ES Time:          | Day 0 |       | Day 1 |       | Day 3 |       |        | Day 6 |       |
|-------------------|-------|-------|-------|-------|-------|-------|--------|-------|-------|
| Array Chip ID:    | 210   | 357   | 124   | 216   | 217   | 222   | 356    | 222   | 245   |
| mmu-mir-431       | 375   | 586   | 216   | 814   | 1,683 | 1,207 | 992    | 2,395 | 525   |
| mmu-mir-30d       | 375   | 1,098 | 337   | 713   | 927   | 724   | 1,231  | 1,518 | 236   |
| S-mmu-mir-425     | 374   | 768   |       | 994   | 269   | 262   | 531    | 339   | 64    |
| cand371:b         | 374   | 430   | 196   | 966   | 820   | 885   | 733    | 990   | 302   |
| MCE-MIR_4791: fwd | 372   | 993   | 252   | 3,517 | 2,701 | 3,446 | 2,322  | 850   | 168   |
| MCE-MIR_4661: rev | 364   | 1,703 | 301   | 6,436 | 417   | 6,610 | 3,121  | 1,914 | 65    |
| MCE-MIR_5068: rev | 348   | 121   |       | 642   | 4,068 | 4,003 | 666    | 2,372 | 4,615 |
| mmu-mir-324-3p    | 346   | 399   | 217   | 759   | 724   | 622   | 425    | 978   | 254   |
| mmu-mir-324-5p    | 344   | 376   | 282   | 779   | 1,144 | 1,029 | 600    | 2,609 | 703   |
| MCE-MIR_6107: fwd | 341   | 399   | 200   | 1,086 | 767   | 1,574 | 1,037  | 714   | 65    |
| MCE-MIR_5914: rev | 336   | 304   | 367   | 5,012 | 6,949 | 6,029 | 3,380  | 2,464 | 209   |
| mmu-mir-151       | 325   | 542   | 298   | 515   | 492   | 399   | 532    | 712   | 196   |
| cand78:a          | 320   | 252   | 196   | 857   | 54    | 34    | 24     | 14    |       |
| mmu-mir-205       | 316   | 795   | 132   | 739   | 264   | 107   | 311    | 285   | 38    |
| MCE-MIR_5363: rev | 310   | 108   | 70    | 951   | 2,523 | 3,974 | 274    | 2,159 | 1,612 |
| MCE-MIR_3541: rev | 304   | 162   | 56    | 1,802 | 1,689 | 3,038 | 864    | 881   | 379   |
| MCE-MIR_5055: rev | 303   | 136   | 166   | 796   | 3,101 | 3,052 | 850    | 805   | 226   |
| MCE-MIR_3628: rev | 296   | 127   | 131   | 324   | 2,441 | 1,538 | 2,745  | 1,218 | 297   |
| mmu-mir-27a       | 294   | 1,525 | 482   | 1,440 | 834   | 606   | 635    | 1,167 | 152   |
| mmu-mir-422b      | 293   | 483   | 142   | 499   | 292   | 364   | 190    | 1,060 | 339   |
| cand42:a          | 287   | 196   | 237   | 2,233 | 2,804 | 5,813 | 1,183  | 2,866 | 296   |
| mmu-mir-30a-5p    | 286   | 740   | 311   | 802   | 856   | 656   | 648    | 1,216 | 141   |
| mmu-mir-17-3p     | 283   | 285   | 98    | 608   | 316   | 282   | 163    | 485   | 106   |
| MCE-MIR_5369: rev | 282   | 140   | 45    | 2,051 | 1,363 | 2,242 | 684    | 633   | 128   |
| MCE-MIR_4320: rev | 280   | 546   | 191   | 1,982 | 1,300 | 3,645 | 5,585  | 2,061 | 42    |
| mmu-mir-363       | 280   | 1,108 | 438   | 1,274 | 334   | 166   | 494    | 33    |       |
| mmu-mir-370       | 280   | 504   | 166   | 538   | 1,587 | 1,328 | 1,439  | 1,748 | 529   |
| mmu-mir-145       | 278   | 392   | 226   | 411   | 389   | 398   | 505    | 1,523 | 126   |
| MCE-MIR_1364: fwd | 274   | 289   | 113   | 1,184 | 656   | 1,379 | 1,457  | 982   | 29    |
| MCE-MIR_5366: rev | 271   | 188   | 74    | 525   | 1,217 | 2,391 | 560    | 820   | 861   |
| cand690           | 271   | 965   | 631   | 2,583 | 1,238 | 3,328 | 18,746 | 1,729 | 42    |
| mmu-mir-484       | 268   | 739   | 129   | 764   | 414   | 360   | 859    | 488   | 94    |
| MCE-MIR_5643: fwd | 263   | 881   | 61    | 1,382 | 488   | 2,001 | 2,592  | 854   | 69    |
| mmu-mir-540       | 260   | 369   | 120   | 332   | 405   | 375   | 425    | 500   | 110   |
| MCE-MIR_5276: fwd | 260   | 274   | 396   | 917   | 2,568 | 4,206 | 1,501  | 614   | 78    |
| MCE-MIR_2470: fwd | 258   | 153   | 102   | 839   | 797   | 1,624 | 608    | 993   | 115   |
| MCE-MIR_5088: rev | 256   | 659   | 24    | 1,478 | 1,205 | 2,887 | 826    | 634   | 271   |
| cand315:a         | 255   | 445   | 275   | 536   | 449   | 451   | 629    | 728   | 184   |

| ES Time:          | Day 0 |       | Day 1 |       | Day 3 |       |       | Day 6  |       |
|-------------------|-------|-------|-------|-------|-------|-------|-------|--------|-------|
| Array Chip ID:    | 210   | 357   | 124   | 216   | 217   | 222   | 356   | 222    | 245   |
| MCE-MIR_5641:rev  | 246   | 397   | 34    | 1,142 | 508   | 1,103 | 827   | 777    | 79    |
| S-mmu-mir-128b    | 241   | 2,643 |       | 4,810 | 437   | 5,299 | 5,373 | 1,459  | 26    |
| MCE-MIR_1544:rev  | 240   | 61    | 131   | 996   | 3,253 | 2,364 | 998   | 786    | 225   |
| mmu-mir-152       | 238   | 516   | 446   | 758   | 910   | 754   | 777   | 2,739  | 1,085 |
| cand210:a         | 237   | 730   | 204   | 790   | 546   | 744   | 661   | 749    | 87    |
| cand412           | 235   | 1,265 | 135   | 1,799 | 752   | 1,235 | 3,993 | 575    | 104   |
| MCE-MIR_5083:rev  | 233   | 322   | 36    | 1,228 | 1,127 | 1,099 | 1,398 | 445    | 128   |
| MCE-MIR_4610: fwd | 233   | 239   | 131   | 2,191 | 4,719 | 4,523 | 9,310 | 875    | 33    |
| cand337           | 232   | 222   | 182   | 479   | 300   | 336   | 259   | 800    | 139   |
| cand374:a         | 231   | 523   | 338   | 313   | 3,074 | 2,631 | 4,367 | 18,338 | 8,198 |
| MCE-MIR_1074:rev  | 230   | 747   | 95    | 1,201 | 1,832 | 3,228 | 5,183 | 598    | 20    |
| cand445           | 230   | 348   | 205   | 3,307 | 1,307 | 4,112 | 1,103 | 1,369  | 101   |
| cand152:b         | 228   | 940   | 321   | 587   | 269   | 361   | 734   | 640    | 99    |
| mmu-mir-31        | 226   | 263   | 133   | 518   | 304   | 266   | 122   | 218    | 55    |
| cand304           | 226   | 244   | 81    | 425   | 179   | 193   | 111   | 659    | 174   |
| S-mmu-mir-25      | 225   | 313   |       | 521   | 218   | 272   | 450   | 213    | 40    |
| MCE-MIR_638: fwd  | 225   | 229   | 68    | 1,066 | 996   | 1,258 | 576   | 466    | 70    |
| mmu-mir-22        | 223   | 602   | 78    | 680   | 459   | 335   | 316   | 210    | 74    |
| mmu-mir-150       | 219   | 501   | 172   | 436   | 28    | 22    | 79    | 10     |       |
| MCE-MIR_2986: fwd | 215   | 564   | 48    | 1,446 | 1,927 | 2,264 | 5,228 | 601    | 22    |
| cand97            | 213   | 303   | 86    | 677   | 154   | 187   | 114   | 192    | 37    |
| MCE-MIR_2679: fwd | 209   | 102   | 17    | 724   | 3,808 | 3,389 | 387   | 1,787  | 3,275 |
| mmu-mir-301       | 206   | 237   | 63    | 1,815 | 514   | 454   | 113   | 636    | 120   |
| mmu-mir-181a      | 205   | 217   | 130   | 300   | 2,271 | 1,873 | 1,879 | 10,309 | 4,096 |
| mmu-mir-154       | 205   | 333   | 71    | 413   | 572   | 383   | 583   | 803    | 175   |
| mmu-mir-28        | 200   | 518   | 148   | 455   | 568   | 454   | 791   | 777    | 140   |
| mmu-mir-337       | 200   | 285   | 157   | 801   | 855   | 662   | 493   | 730    | 150   |
| cand618           | 191   | 114   |       | 928   | 3,998 | 3,666 | 1,479 | 1,847  | 1,184 |
| MCE-MIR_4755: fwd | 191   | 306   | 51    | 1,810 | 826   | 1,158 | 970   | 329    | 30    |
| cand278:a         | 189   | 283   | 301   | 468   | 897   | 754   | 1,015 | 5,962  | 1,540 |
| mmu-mir-346       | 187   | 127   | 90    | 310   | 569   | 738   | 274   | 480    | 80    |
| MCE-MIR_5745: fwd | 186   | 138   | 140   | 656   | 1,747 | 2,601 | 2,234 | 878    | 20    |
| MCE-MIR_5216: rev | 185   | 274   | 48    | 1,384 | 2,495 | 3,866 | 2,859 | 1,557  | 251   |
| MCE-MIR_543: fwd  | 183   | 254   | 33    | 813   | 430   | 1,173 | 1,469 | 501    | 214   |
| MCE-MIR_3557: rev | 183   | 254   | 124   | 628   | 1,465 | 3,095 | 837   | 491    | 416   |
| MCE-MIR_4010: rev | 182   | 241   | 57    | 525   | 625   | 1,108 | 1,011 | 360    | 128   |
| cand595:a         | 181   | 76    | 116   | 1,517 | 2,690 | 2,628 | 948   | 440    | 41    |
| mmu-let-7c        | 180   | 537   | 365   | 176   | 503   | 649   | 611   | 12,790 | 3,478 |

| ES Time:          | Day 0 |       | Day 1 |       | Day 3 |       |       | Day 6  |       |
|-------------------|-------|-------|-------|-------|-------|-------|-------|--------|-------|
| Array Chip ID:    | 210   | 357   | 124   | 216   | 217   | 222   | 356   | 222    | 245   |
| mmu-mir-335       | 180   | 660   | 159   | 1,013 | 7,879 | 5,248 | 5,755 | 11,552 | 1,895 |
| cand462           | 177   | 2,279 | 72    | 2,662 | 472   | 1,001 | 5,182 | 416    | 44    |
| mmu-mir-143       | 177   | 270   | 78    | 213   | 212   | 205   | 137   | 588    | 131   |
| cand336           | 175   | 198   | 120   | 445   | 403   | 344   | 233   | 624    | 139   |
| S-mmu-mir-363     | 173   | 656   |       | 624   | 233   | 141   | 423   | 73     |       |
| MCE-MIR_3624:rev  | 173   | 111   | 92    | 311   | 890   | 1,032 | 473   | 766    | 486   |
| MCE-MIR_1408: fwd | 173   | 1,218 | 42    | 3,192 | 658   | 1,779 | 4,346 | 708    | 22    |
| S-mmu-mir-23a     | 173   | 251   |       | 681   | 404   | 625   | 522   | 371    | 65    |
| MCE-MIR_1066:rev  | 168   | 172   | 48    | 366   | 298   | 542   | 918   | 290    | 21    |
| cand1:b           | 164   | 290   | 111   | 751   | 343   | 444   | 188   | 261    | 55    |
| cand118           | 164   | 410   | 296   | 208   | 398   | 706   | 659   | 9,747  | 2,337 |
| MCE-MIR_5411:rev  | 162   | 1,277 | 30    | 2,600 | 314   | 2,046 | 6,821 | 1,090  | 31    |
| MCE-MIR_3572:rev  | 162   | 162   | 33    | 788   | 1,265 | 1,699 | 344   | 732    | 983   |
| cand497:a         | 160   | 262   | 124   | 315   | 598   | 765   | 638   | 368    | 83    |
| mmu-mir-15a       | 159   | 605   | 203   | 896   | 943   | 733   | 706   | 552    | 109   |
| MCE-MIR_4198: fwd | 159   | 208   | 45    | 994   | 700   | 699   | 1,119 | 184    | 48    |
| S-mmu-mir-92-2    | 159   | 876   |       | 1,503 | 562   | 2,144 | 6,476 | 860    | 22    |
| mmu-mir-485-3p    | 158   | 364   | 76    | 442   | 297   | 287   | 463   | 198    | 40    |
| S-mmu-mir-183     | 157   | 336   |       | 417   | 115   | 87    | 235   | 60     | 23    |
| MCE-MIR_2889: fwd | 155   | 221   | 110   | 378   | 396   | 962   | 499   | 586    | 78    |
| MCE-MIR_2866:rev  | 154   | 364   | 18    | 1,146 | 1,825 | 1,690 | 1,347 | 867    | 416   |
| MCE-MIR_2563: fwd | 153   | 958   | 68    | 207   | 666   | 573   | 1,540 | 3,005  | 458   |
| S-mmu-mir-329     | 153   | 151   |       | 419   | 292   | 272   | 206   | 365    | 59    |
| mmu-mir-222       | 152   | 265   | 107   | 366   | 337   | 283   | 270   | 601    | 149   |
| cand532:a         | 151   | 50    | 24    | 134   | 1,904 | 1,376 | 298   | 879    | 648   |
| MCE-MIR_3958: fwd | 150   | 125   | 42    | 746   | 1,897 | 3,214 | 368   | 1,433  | 3,975 |
| MCE-MIR_1611: fwd | 149   | 111   | 52    | 594   | 825   | 903   | 1,318 | 422    | 69    |
| mmu-mir-126-3p    | 145   | 309   | 146   | 171   | 941   | 715   | 863   | 221    | 68    |
| cand297:b         | 143   | 281   | 122   | 278   | 341   | 301   | 264   | 174    | 43    |
| MCE-MIR_5473: fwd | 141   | 229   | 27    | 372   | 132   | 253   | 1,229 | 209    | 30    |
| MCE-MIR_2983:rev  | 141   | 107   | 51    | 193   | 199   | 439   | 152   | 335    | 46    |
| cand532:b         | 137   | 429   | 31    | 2,307 | 1,932 | 1,477 | 2,160 | 329    | 63    |
| cand459           | 134   | 81    | 55    | 863   | 1,860 | 1,972 | 1,097 | 538    | 394   |
| mmu-mir-376a      | 134   | 126   | 11    | 192   | 249   | 220   | 118   | 731    | 177   |
| MCE-MIR_1746:rev  | 134   | 158   |       | 152   | 140   | 85    | 205   | 485    | 41    |
| cand42:b          | 132   | 138   | 24    | 254   | 409   | 446   | 226   | 282    | 160   |
| MCE-MIR_2680: fwd | 132   | 282   | 12    | 1,999 | 1,285 | 2,404 | 1,613 | 752    | 48    |
| cand161           | 132   | 281   | 233   | 146   | 271   | 529   | 435   | 7,742  | 1,708 |

| ES Time:          | Day 0 |     | Day 1 |       | Day 3 |       |       | Day 6  |       |
|-------------------|-------|-----|-------|-------|-------|-------|-------|--------|-------|
| Array Chip ID:    | 210   | 357 | 124   | 216   | 217   | 222   | 356   | 222    | 245   |
| mmu-mir-296       | 131   | 345 |       | 288   | 147   | 200   | 261   | 197    | 30    |
| S-mmu-mir-210     | 130   | 262 |       | 406   | 132   | 246   | 285   | 164    | 54    |
| mmu-mir-410       | 129   | 360 | 121   | 626   | 1,228 | 990   | 792   | 1,380  | 221   |
| MCE-MIR_4922:rev  | 129   | 598 | 16    | 2,684 | 308   | 450   | 980   | 200    | 24    |
| MCE-MIR_3653:rev  | 127   | 271 |       | 858   | 329   | 1,190 | 387   | 217    | 39    |
| S-mmu-let-7d      | 126   | 228 | 33    | 106   | 121   | 236   | 170   | 207    | 20    |
| MCE-MIR_3886: fwd | 126   | 50  | 44    | 185   | 305   | 509   | 133   | 267    | 33    |
| cand347           | 126   | 82  | 36    | 376   | 1,096 | 1,389 | 440   | 797    | 264   |
| MCE-MIR_5363: fwd | 124   | 132 | 100   | 1,397 | 578   | 2,744 | 728   | 892    | 22    |
| cand342: b        | 123   | 212 | 170   | 1,445 | 1,109 | 2,555 | 2,146 | 1,059  | 60    |
| mmu-mir-155       | 122   | 215 | 200   | 405   | 605   | 366   | 578   | 711    | 392   |
| MCE-MIR_2902: rev | 122   | 113 | 31    | 590   | 329   | 999   | 502   | 670    | 73    |
| mmu-mir-221       | 121   | 283 | 82    | 327   | 273   | 182   | 323   | 554    | 165   |
| mmu-mir-101a      | 120   | 156 | 19    | 608   | 119   | 65    | 31    | 54     |       |
| MCE-MIR_406: rev  | 120   | 234 |       | 1,380 | 161   | 764   | 730   | 214    |       |
| MCE-MIR_936: rev  | 118   | 123 | 37    | 450   | 395   | 502   | 505   | 410    | 93    |
| S-mmu-mir-379     | 118   | 307 |       | 644   | 588   | 284   | 995   | 480    | 37    |
| mmu-mir-487b      | 117   | 278 | 116   | 318   | 526   | 452   | 563   | 861    | 173   |
| MCE-MIR_2968: fwd | 117   | 55  | 34    | 241   | 216   | 402   | 228   | 220    | 42    |
| S-mmu-mir-24-2    | 117   | 154 |       | 303   | 145   | 70    | 124   | 101    | 33    |
| MCE-MIR_4726: fwd | 117   | 686 | 10    | 798   | 340   | 607   | 4,969 | 231    | 55    |
| MCE-MIR_2815: fwd | 114   | 243 | 45    | 654   | 700   | 677   | 1,010 | 319    | 75    |
| MCE-MIR_6050: rev | 113   | 175 |       | 1,037 | 1,545 | 969   | 735   | 379    | 154   |
| MCE-MIR_3439: rev | 110   | 124 |       | 582   | 472   | 368   | 562   | 141    | 33    |
| MCE-MIR_5511: rev | 109   | 466 | 15    | 2,265 | 147   | 1,160 | 1,109 | 346    |       |
| S-mmu-mir-34c     | 106   | 99  |       | 172   | 186   | 220   | 196   | 307    | 42    |
| cand501           | 105   | 97  | 23    | 238   | 226   | 237   | 98    | 183    | 109   |
| mmu-mir-297       | 105   | 339 | 110   | 1,287 | 109   | 57    | 94    | 28     |       |
| MCE-MIR_3847: rev | 104   | 68  | 41    | 203   | 300   | 422   | 108   | 227    | 42    |
| mmu-mir-29a       | 104   | 311 | 214   | 234   | 246   | 137   | 161   | 90     | 24    |
| MCE-MIR_3492: fwd | 104   | 209 | 15    | 468   | 809   | 1,282 | 2,783 | 311    | 48    |
| mmu-mir-125b      | 102   | 308 | 70    | 151   | 2,383 | 2,048 | 3,594 | 16,148 | 5,333 |
| MIR257            | 102   | 745 | 151   | 582   | 371   | 170   | 1,073 | 755    | 76    |
| S-mmu-mir-93      | 101   | 128 |       | 170   | 126   | 92    | 95    | 165    | 53    |
| MCE-MIR_4030: rev | 100   | 308 | 27    | 1,372 | 660   | 718   | 3,625 | 272    | 22    |
| MCE-MIR_5473: rev | 100   | 166 | 18    | 251   | 187   | 202   | 164   | 185    | 85    |
| MCE-MIR_1283: fwd | 100   | 136 | 14    | 265   | 288   | 284   | 141   | 196    | 88    |
| cand109: b        | 100   | 102 | 46    | 420   | 266   | 520   | 316   | 253    | 62    |

| ES Time:         | Day 0 |       | Day 1 |       | Day 3 |       |       | Day 6  |       |
|------------------|-------|-------|-------|-------|-------|-------|-------|--------|-------|
| Array Chip ID:   | 210   | 357   | 124   | 216   | 217   | 222   | 356   | 222    | 245   |
| MCE-MIR_3477:rev | 100   |       | 167   | 388   | 3,243 | 2,623 | 1,896 | 1,735  | 778   |
| cand624          | 99    | 76    | 18    | 458   | 504   | 343   | 75    | 198    | 69    |
| MCE-MIR_988:fwd  | 99    | 116   | 11    | 179   | 201   | 146   | 53    | 137    | 100   |
| MCE-MIR_725:fwd  | 98    | 101   |       | 211   | 265   | 233   | 96    | 197    | 120   |
| mmu-mir-149      | 97    | 178   | 90    | 303   | 280   | 183   | 294   | 285    | 45    |
| MCE-MIR_5004:rev | 97    | 81    | 20    | 413   | 768   | 791   | 294   | 232    | 125   |
| MCE-MIR_2078:fwd | 95    | 43    | 64    | 177   | 170   | 165   | 91    | 152    | 38    |
| mmu-mir-323      | 92    | 254   | 67    | 351   | 372   | 273   | 476   | 282    | 44    |
| MIR121           | 92    | 246   | 84    | 211   | 140   | 87    | 277   | 115    | 40    |
| MCE-MIR_5295:rev | 91    | 95    |       | 209   | 156   | 165   | 132   | 113    | 71    |
| cand149:b        | 91    | 452   | 69    | 1,646 | 1,085 | 2,588 | 2,516 | 522    | 29    |
| MCE-MIR_1756:rev | 90    | 99    | 24    | 125   | 126   | 226   | 161   | 189    | 24    |
| mmu-mir-344      | 89    | 121   | 68    | 210   | 279   | 230   | 198   | 871    | 204   |
| mmu-mir-129-5p   | 87    | 109   | 21    | 165   | 137   | 196   | 193   | 169    | 25    |
| S-mmu-mir-431    | 87    | 94    |       | 200   | 719   | 937   | 400   | 312    | 175   |
| MIR4             | 86    | 126   | 99    | 173   | 38    | 19    | 44    | 62     |       |
| MCE-MIR_1569:rev | 85    | 84    | 43    | 327   | 388   | 420   | 1,100 | 166    | 30    |
| MCE-MIR_3663:fwd | 85    | 69    | 27    | 121   | 223   | 230   | 163   | 227    | 46    |
| S-mmu-mir-302c   | 85    | 156   | 36    | 161   | 24    | 38    | 25    | 58     |       |
| mmu-mir-485-5p   | 85    | 179   | 55    | 120   | 156   | 174   | 263   | 236    | 63    |
| mmu-mir-299      | 85    | 340   | 48    | 389   | 195   | 149   | 356   | 241    | 28    |
| cand334:b        | 84    |       |       | 208   | 181   | 182   | 110   | 92     | 41    |
| MCE-MIR_4031:fwd | 84    | 84    | 35    | 111   | 110   | 223   | 127   | 275    | 32    |
| mmu-mir-302c     | 83    | 1,171 | 47    | 908   |       |       | 20    | 16     |       |
| mmu-mir-434-5p   | 83    | 177   | 25    | 208   | 293   | 230   | 252   | 237    | 63    |
| MCE-MIR_5503:rev | 82    | 1,030 |       | 2,269 | 542   | 360   | 4,558 | 50     |       |
| cand678          | 82    |       | 36    | 310   | 483   | 378   | 126   | 162    | 48    |
| MCE-MIR_5339:rev | 82    | 51    | 26    | 298   | 280   | 257   | 117   | 121    | 24    |
| mmu-mir-224      | 81    | 99    | 49    | 174   | 242   | 129   | 304   | 694    | 88    |
| cand346          | 81    | 241   | 45    | 258   | 242   | 275   | 361   | 654    | 83    |
| MCE-MIR_5488:rev | 80    | 95    |       | 130   | 98    | 105   | 93    | 116    | 59    |
| cand334:a        | 79    | 53    | 13    | 584   | 757   | 599   | 455   | 108    | 50    |
| MCE-MIR_557:fwd  | 77    | 121   |       | 200   | 161   | 119   | 118   | 108    | 70    |
| S-mmu-mir-7b     | 77    | 53    |       | 82    | 92    | 171   | 65    | 155    | 36    |
| MCE-MIR_3613:rev | 76    | 92    | 20    | 260   | 401   | 332   | 349   | 216    | 110   |
| MCE-MIR_5454:rev | 76    | 125   |       | 213   | 162   | 148   | 143   | 104    | 104   |
| mmu-let-7a       | 76    | 400   | 209   | 126   | 356   | 556   | 566   | 12,869 | 2,248 |
| S-mmu-mir-290    | 75    | 699   |       | 217   | 25    | 20    | 119   |        |       |

| ES Time:          | Day 0 |       | Day 1 |       | Day 3 |       |       | Day 6 |       |
|-------------------|-------|-------|-------|-------|-------|-------|-------|-------|-------|
| Array Chip ID:    | 210   | 357   | 124   | 216   | 217   | 222   | 356   | 222   | 245   |
| S-mmu-mir-28      | 75    | 163   |       | 189   | 294   | 197   | 346   | 507   | 120   |
| mmu-let-7e        | 75    | 202   | 129   | 126   | 377   | 577   | 648   | 6,989 | 897   |
| MCE-MIR_2345: fwd | 75    | 963   |       | 1,605 | 466   | 1,552 | 4,243 | 485   |       |
| cand5             | 75    | 48    | 18    | 153   | 837   | 287   | 146   | 177   | 413   |
| cand386:a         | 74    | 83    |       | 85    | 124   | 165   | 117   | 152   | 28    |
| MCE-MIR_5322: fwd | 73    | 96    |       | 224   | 158   | 144   | 104   | 109   | 82    |
| MCE-MIR_5596: rev | 73    | 120   | 42    | 233   | 155   | 278   | 307   | 79    | 18    |
| S-mmu-mir-342     | 73    | 144   |       | 178   | 228   | 220   | 243   | 711   | 266   |
| S-mmu-mir-18      | 72    | 155   |       | 154   | 94    | 56    | 106   | 63    |       |
| mmu-mir-200a      | 72    | 154   | 65    | 525   | 101   | 59    | 65    | 27    |       |
| cand213           | 72    | 81    | 54    | 128   | 183   | 150   | 151   | 308   | 55    |
| cand490           | 72    | 198   | 154   | 118   | 182   | 427   | 345   | 7,215 | 977   |
| MCE-MIR_1046: rev | 72    | 133   | 28    | 234   | 346   | 510   | 537   | 344   | 56    |
| MCE-MIR_469: fwd  | 71    | 118   | 33    | 178   | 147   | 264   | 250   | 205   | 29    |
| MCE-MIR_5872: fwd | 71    | 70    | 36    | 546   | 331   | 951   | 378   | 296   | 47    |
| mmu-mir-377       | 70    | 65    |       | 111   | 51    | 27    | 909   | 62    |       |
| mmu-mir-345       | 70    | 191   | 42    | 199   | 226   | 188   | 195   | 310   | 70    |
| MCE-MIR_2349: rev | 70    | 208   | 25    | 165   | 119   | 173   | 265   | 158   | 22    |
| MCE-MIR_5055: fwd | 70    | 130   | 19    | 225   | 1,026 | 970   | 352   | 182   | 109   |
| mmu-mir-223       | 69    | 153   |       | 130   | 161   | 168   | 83    | 129   | 58    |
| mmu-mir-381       | 69    | 187   | 48    | 401   | 262   | 174   | 215   | 294   | 31    |
| S-mmu-mir-34a     | 67    | 86    |       | 152   | 92    | 81    | 67    | 67    | 40    |
| MCE-MIR_2361: fwd | 67    | 1,063 |       | 2,017 | 122   | 1,160 | 1,312 | 367   |       |
| MCE-MIR_4763: fwd | 67    | 194   | 10    | 182   | 141   | 127   | 96    | 96    | 67    |
| cand541           | 67    | 40    | 22    | 296   | 780   | 537   | 1,009 | 280   | 99    |
| MIR43             | 67    | 100   | 25    | 271   | 47    | 26    | 21    | 23    |       |
| MCE-MIR_3791: rev | 67    | 184   | 12    | 706   | 746   | 643   | 1,773 | 113   | 42    |
| cand709           | 66    | 167   | 135   | 100   | 147   | 346   | 324   | 6,720 | 988   |
| mmu-mir-351       | 65    | 95    | 40    | 142   | 895   | 808   | 867   | 4,024 | 1,195 |
| MCE-MIR_6084: rev | 65    |       | 23    | 95    | 121   | 238   | 33    | 113   | 19    |
| MCE-MIR_5197: rev | 63    | 38    | 18    | 180   | 349   | 223   | 116   | 196   | 41    |
| MCE-MIR_4345: rev | 63    | 176   |       | 511   | 166   | 295   | 432   | 145   |       |
| MCE-MIR_2524: fwd | 63    | 45    | 37    | 75    | 199   | 366   | 84    | 235   | 55    |
| MCE-MIR_1974: fwd | 63    | 379   |       | 696   | 57    | 422   | 3,193 | 175   |       |
| cand26            | 63    | 45    | 28    | 154   | 193   | 182   | 163   | 168   | 81    |
| cand203           | 62    | 123   | 27    | 326   | 185   | 189   | 206   | 155   | 43    |
| mmu-mir-148b      | 62    | 168   | 71    | 283   | 140   | 86    | 159   | 165   | 28    |
| cand153:a         | 61    | 99    | 12    | 277   | 105   | 143   | 141   | 79    | 44    |



| ES Time:          | Day 0 |     | Day 1 |       | Day 3 |       |       | Day 6 |     |
|-------------------|-------|-----|-------|-------|-------|-------|-------|-------|-----|
| Array Chip ID:    | 210   | 357 | 124   | 216   | 217   | 222   | 356   | 222   | 245 |
| MCE-MIR_3444:rev  | 61    |     | 15    | 64    | 86    | 125   | 88    | 81    | 19  |
| MCE-MIR_1788:rev  | 60    | 229 |       | 184   | 67    | 127   | 326   | 203   | 19  |
| MCE-MIR_1773:rev  | 60    | 90  | 20    | 67    | 78    | 156   | 124   | 97    | 29  |
| MCE-MIR_1793: fwd | 59    | 73  | 13    | 451   | 197   | 192   | 427   | 74    | 19  |
| cand65            | 59    | 70  |       | 236   | 668   | 662   | 150   | 231   | 217 |
| mmu-mir-96        | 59    | 170 | 14    | 657   | 36    |       | 31    |       |     |
| MCE-MIR_4493: fwd | 59    | 58  | 23    | 61    | 35    | 27    | 40    | 17    |     |
| S-mmu-mir-127     | 58    |     |       | 158   | 162   | 158   | 86    | 236   | 92  |
| S-mmu-mir-196b    | 58    | 67  |       | 35    | 59    | 82    | 39    | 105   | 20  |
| MCE-MIR_4791:rev  | 58    | 144 | 38    | 345   | 140   | 79    | 147   | 48    |     |
| mmu-mir-300       | 58    | 159 | 48    | 351   | 228   | 177   | 173   | 264   | 27  |
| MCE-MIR_3518:rev  | 58    | 75  |       | 480   | 773   | 1,248 | 417   | 314   | 755 |
| cand244           | 57    | 68  | 31    | 809   | 138   | 1,731 | 351   | 400   | 23  |
| MCE-MIR_3441: fwd | 57    | 106 |       | 304   | 216   | 224   | 669   | 114   | 19  |
| MCE-MIR_734: fwd  | 57    | 79  | 16    | 63    | 62    | 107   | 42    | 115   | 22  |
| S-mmu-mir-1-1     | 57    |     |       | 64    | 87    | 148   | 28    | 95    | 21  |
| MCE-MIR_5300: fwd | 56    | 59  |       | 112   | 95    | 89    | 78    | 81    | 48  |
| MCE-MIR_4714: fwd | 56    | 71  |       | 107   | 110   | 100   | 79    | 85    | 59  |
| MCE-MIR_5790: fwd | 56    | 140 | 13    | 1,347 | 1,091 | 1,182 | 1,211 | 267   | 37  |
| mmu-mir-330       | 56    | 81  | 34    | 99    | 104   | 78    | 121   | 197   | 42  |
| mmu-mir-425       | 56    | 88  | 13    | 131   | 105   | 195   | 54    | 126   | 53  |
| S-mmu-mir-412     | 56    | 65  |       | 107   | 381   | 313   | 360   | 413   | 148 |
| mmu-mir-186       | 55    | 85  | 26    | 327   | 242   | 136   | 94    | 212   | 32  |
| MCE-MIR_1342: fwd | 54    | 169 | 108   | 225   | 60    | 426   | 112   | 84    | 35  |
| MCE-MIR_5135: fwd | 54    | 79  |       | 145   | 78    | 121   | 220   | 80    |     |
| MCE-MIR_2617: fwd | 52    | 98  | 12    | 59    | 46    | 72    | 121   | 84    |     |
| S-mmu-mir-154     | 52    | 62  |       | 454   | 334   | 126   | 53    | 33    |     |
| cand57            | 51    | 107 | 31    | 521   | 369   | 3,866 | 446   | 555   | 112 |
| S-mmu-mir-23b     | 51    | 81  |       | 69    | 51    | 30    | 47    | 46    |     |
| MCE-MIR_4712: fwd | 51    | 116 |       | 110   | 116   | 114   | 56    | 72    | 71  |
| MCE-MIR_1015: rev | 51    | 52  | 36    | 95    | 207   | 183   | 140   | 143   | 60  |
| MCE-MIR_5210: fwd | 51    |     |       | 128   | 86    | 85    | 68    | 57    | 57  |
| mmu-mir-539       | 50    | 104 | 18    | 83    | 161   | 93    | 254   | 246   | 89  |
| MCE-MIR_4748: rev | 50    | 65  | 13    | 65    | 78    | 97    | 65    | 94    | 38  |
| MCE-MIR_6055: rev | 49    | 95  |       | 235   | 119   | 147   | 192   | 106   |     |
| mmu-mir-328       | 49    | 198 | 31    | 223   | 210   | 296   | 475   | 421   | 47  |
| MCE-MIR_4491: rev | 49    |     |       | 87    | 38    | 77    | 24    | 105   |     |
| S-mmu-mir-194-2   | 49    | 148 |       | 466   | 95    | 167   | 411   | 49    |     |

| ES Time:          | Day 0 |     | Day 1 |     | Day 3 |       |       | Day 6  |       |
|-------------------|-------|-----|-------|-----|-------|-------|-------|--------|-------|
| Array Chip ID:    | 210   | 357 | 124   | 216 | 217   | 222   | 356   | 222    | 245   |
| mmu-mir-214       | 48    | 152 | 24    | 237 | 2,006 | 1,496 | 1,998 | 10,152 | 2,336 |
| MCE-MIR_2092: fwd | 48    | 76  | 25    | 203 | 201   | 314   | 245   | 128    | 31    |
| MCE-MIR_5389: rev | 46    | 43  | 19    | 110 | 109   | 169   | 101   | 91     | 34    |
| mmu-mir-218       | 46    | 182 | 43    | 233 | 459   | 310   | 797   | 5,163  | 801   |
| S-mmu-mir-99b     | 46    | 82  |       | 176 | 366   | 187   | 274   | 276    | 141   |
| MCE-MIR_4752: rev | 46    | 119 |       | 111 | 153   | 112   | 52    | 67     | 68    |
| MCE-MIR_2285: fwd | 46    | 158 |       | 388 | 382   | 310   | 1,408 | 51     | 19    |
| S-mmu-mir-7-2     | 46    | 66  |       | 84  | 101   | 144   | 80    | 79     | 26    |
| cand103: a        | 45    | 46  | 24    | 63  | 51    | 34    | 52    | 50     |       |
| cand106: b        | 45    | 70  | 17    | 39  | 34    | 67    | 46    | 81     |       |
| MCE-MIR_5418: fwd | 45    | 977 |       | 794 | 160   | 456   | 5,405 | 206    | 22    |
| cand210: b        | 44    | 51  | 37    | 85  | 202   | 200   | 268   | 213    | 38    |
| cand570           | 44    | 138 | 26    | 968 | 201   | 795   | 792   | 331    | 20    |
| MCE-MIR_5193: rev | 44    |     |       | 101 | 197   | 116   | 83    | 74     | 25    |
| MCE-MIR_463: fwd  | 44    | 72  |       | 93  | 80    | 86    | 68    | 64     | 36    |
| MCE-MIR_3820: fwd | 44    | 69  | 15    | 119 | 122   | 149   | 71    | 87     | 50    |
| MCE-MIR_5152: fwd | 44    | 76  | 15    | 54  | 42    | 104   | 129   | 75     | 22    |
| mmu-let-7d        | 43    | 182 | 59    | 89  | 103   | 220   | 264   | 8,185  | 674   |
| cand212           | 43    | 104 | 55    | 189 | 223   | 200   | 303   | 398    | 68    |
| MCE-MIR_780: rev  | 43    | 138 |       | 158 | 81    | 184   | 594   | 52     |       |
| cand564: a        | 43    |     | 12    | 78  | 161   | 118   | 64    | 219    | 81    |
| MCE-MIR_4513: fwd | 43    | 42  | 12    | 117 | 144   | 160   | 165   | 137    | 50    |
| S-mmu-mir-345     | 42    | 47  |       | 163 | 175   | 191   | 66    | 347    | 75    |
| cand465: b        | 42    | 63  | 22    | 83  |       |       |       |        |       |
| cand119           | 42    | 121 | 86    | 101 | 104   | 285   | 234   | 6,299  | 896   |
| S-mmu-mir-377     | 42    | 37  |       | 60  | 49    | 30    | 51    | 42     |       |
| S-mmu-mir-125a    | 41    | 72  |       | 114 | 187   | 150   | 196   | 292    | 76    |
| mmu-mir-184       | 41    | 95  | 50    | 91  | 116   | 110   | 118   | 158    | 41    |
| MCE-MIR_5340: fwd | 41    | 58  |       | 80  | 93    | 62    | 1,111 | 96     |       |
| S-mmu-mir-16-1    | 41    | 64  |       | 92  | 76    | 38    | 39    | 22     |       |
| MCE-MIR_3261: fwd | 41    | 46  |       | 104 | 143   | 142   | 73    | 90     | 67    |
| MCE-MIR_329: fwd  | 40    |     | 34    | 261 | 329   | 635   | 469   | 292    | 49    |
| MCE-MIR_4716: fwd | 39    | 74  |       | 159 | 241   | 329   | 369   | 199    | 25    |
| cand707           | 39    | 46  | 28    | 96  | 53    | 62    | 112   | 87     |       |
| cand284: b        | 39    | 38  | 30    | 277 | 497   | 356   | 300   | 168    | 20    |
| S-mmu-mir-187     | 38    | 58  |       | 92  | 89    | 123   | 58    | 71     | 18    |
| MCE-MIR_5736: rev | 38    | 75  |       | 77  | 64    | 92    | 99    | 64     |       |
| MCE-MIR_3684: rev | 38    | 77  |       | 118 | 108   | 34    | 160   | 60     | 26    |

| ES Time:          | Day 0 |     | Day 1 |     | Day 3 |       |       | Day 6 |       |
|-------------------|-------|-----|-------|-----|-------|-------|-------|-------|-------|
| Array Chip ID:    | 210   | 357 | 124   | 216 | 217   | 222   | 356   | 222   | 245   |
| mmu-mir-470       | 38    | 88  | 36    | 95  | 134   | 89    | 190   | 324   | 71    |
| MCE-MIR_3478:rev  | 38    |     |       | 75  | 248   | 381   | 103   | 216   | 176   |
| mmu-mir-181c      | 37    | 72  |       | 119 | 130   | 76    | 229   | 548   | 42    |
| cand457:b         | 37    | 85  | 15    | 87  | 54    | 104   | 258   | 110   |       |
| S-mmu-mir-184     | 37    |     |       | 39  | 52    | 100   | 29    | 69    | 18    |
| S-mmu-mir-361     | 37    | 101 |       | 58  | 51    | 25    | 102   | 51    | 23    |
| mmu-mir-129-3p    | 37    | 89  | 10    | 100 | 52    | 44    | 93    | 41    |       |
| cand1:a           | 37    | 50  | 33    | 145 | 103   | 61    | 66    | 65    |       |
| MCE-MIR_959:rev   | 37    | 54  | 11    | 66  | 64    | 126   | 38    | 59    |       |
| mmu-mir-380-3p    | 37    | 114 | 36    | 185 | 504   | 337   | 401   | 724   | 65    |
| MCE-MIR_5406:rev  | 37    |     | 17    | 56  | 54    | 99    | 38    | 55    | 24    |
| MCE-MIR_3101:rev  | 36    | 106 | 13    | 130 | 121   | 139   | 314   | 90    | 30    |
| MCE-MIR_942:rev   | 36    | 72  | 14    | 144 | 129   | 203   | 360   | 82    | 39    |
| cand115:b         | 36    | 890 |       | 950 | 151   | 375   | 3,035 | 78    | 29    |
| MCE-MIR_4756:rev  | 36    | 100 |       | 90  | 73    | 79    | 52    | 43    | 59    |
| S-mmu-mir-465     | 36    | 104 |       | 129 | 76    | 49    | 194   | 200   | 39    |
| MCE-MIR_1508: fwd | 36    |     |       | 372 | 474   | 554   | 169   | 202   | 50    |
| S-mmu-mir-208     | 36    | 120 |       | 377 | 146   | 205   | 216   | 42    | 18    |
| MCE-MIR_18: fwd   | 36    | 42  |       | 166 | 78    | 159   | 159   | 76    |       |
| mmu-let-7b        | 36    | 147 | 94    | 81  | 116   | 225   | 175   | 8,244 | 1,204 |
| cand192           | 36    | 40  |       | 204 | 483   | 369   | 533   | 104   | 56    |
| MCE-MIR_4153: fwd | 36    |     |       | 155 | 2,080 | 1,455 | 376   | 349   | 26    |
| cand106:a         | 36    | 126 | 56    | 137 | 66    | 206   | 422   | 4,941 | 403   |
| MCE-MIR_4202:rev  | 36    | 34  |       | 80  | 107   | 56    | 107   | 50    |       |
| cand286           | 36    |     |       | 132 | 729   | 294   | 279   | 166   | 138   |
| S-mmu-mir-193     | 36    | 56  |       | 96  | 99    | 92    | 148   | 177   | 35    |
| MCE-MIR_5100:rev  | 36    | 48  |       | 89  | 251   | 123   | 194   | 80    | 32    |
| MCE-MIR_2196: fwd | 36    | 66  |       | 279 | 193   | 55    | 285   | 22    | 21    |
| cand616:b         | 35    |     | 19    | 122 | 135   | 175   | 117   | 86    | 19    |
| S-mmu-mir-200a    | 35    | 44  |       | 54  | 38    |       | 52    | 16    |       |
| MCE-MIR_2111: fwd | 35    | 155 | 24    | 264 | 62    | 84    | 246   | 30    |       |
| MCE-MIR_5597: fwd | 34    | 96  | 15    | 67  | 57    | 107   | 59    | 77    | 20    |
| MIR102            | 34    | 51  | 19    | 187 | 154   | 137   | 204   | 171   | 28    |
| cand172:a         | 34    |     | 13    | 45  | 65    | 62    | 50    | 44    |       |
| mmu-mir-188       | 34    | 48  | 11    | 92  | 205   | 247   | 93    | 208   | 123   |
| mmu-mir-128a      | 34    | 121 | 26    | 92  | 78    | 42    | 150   | 93    | 23    |
| mmu-mir-331       | 33    | 49  | 20    | 113 | 181   | 124   | 152   | 173   | 22    |
| cand386:b         | 33    | 117 |       | 291 | 26    | 106   | 152   | 64    |       |

| ES Time:         | Day 0 |     | Day 1 |     | Day 3 |     |       | Day 6 |       |
|------------------|-------|-----|-------|-----|-------|-----|-------|-------|-------|
| Array Chip ID:   | 210   | 357 | 124   | 216 | 217   | 222 | 356   | 222   | 245   |
| S-mmu-mir-199b   | 33    | 56  |       | 77  | 773   | 515 | 799   | 9,882 | 2,319 |
| MCE-MIR_5328:rev | 33    | 620 | 13    | 537 | 266   | 440 | 4,873 | 136   |       |
| S-mmu-mir-384    | 32    |     |       |     |       |     |       | 15    |       |
| S-mmu-mir-34b    | 32    | 56  |       | 141 | 142   | 121 | 133   | 154   | 25    |
| MCE-MIR_777:rev  | 32    | 78  |       | 158 | 65    | 334 | 733   | 37    |       |
| MCE-MIR_1829:rev | 32    | 62  |       | 77  | 39    |     | 88    |       |       |
| S-mmu-mir-323    | 31    | 178 |       | 123 | 56    | 32  | 383   | 25    |       |
| MCE-MIR_399:fwd  | 31    | 37  |       | 71  | 71    | 45  | 74    | 25    |       |
| MCE-MIR_2134:fwd | 31    | 54  |       | 94  | 98    | 78  | 220   | 62    | 23    |
| S-mmu-mir-27a    | 31    | 56  |       | 92  | 51    | 23  | 55    | 17    |       |
| mmu-mir-187      | 30    | 74  | 24    | 115 | 125   | 99  | 116   | 116   | 25    |
| MCE-MIR_2464:fwd | 30    | 41  |       | 101 | 94    | 68  | 121   | 61    |       |
| MCE-MIR_4087:rev | 29    | 46  |       | 112 | 125   | 77  | 211   | 38    |       |
| MCE-MIR_1576:rev | 29    | 31  |       | 41  | 73    | 57  | 106   | 75    |       |
| MCE-MIR_2304:rev | 29    | 40  |       | 23  | 48    | 61  |       | 36    |       |
| MCE-MIR_3667:fwd | 29    | 51  |       | 52  | 52    | 55  | 126   | 65    |       |
| cand104:b        | 29    | 43  | 23    | 44  | 54    | 46  | 46    | 80    | 20    |
| cand667:b        | 29    |     | 18    | 108 | 306   | 189 | 188   | 72    | 25    |
| mmu-mir-207      | 29    | 95  |       | 96  | 78    | 129 | 146   | 83    | 24    |
| MCE-MIR_1742:rev | 28    |     |       | 117 | 263   | 56  | 2,130 | 33    |       |
| S-mmu-mir-218-2  | 28    | 52  |       | 36  | 35    | 48  |       | 86    | 20    |
| cand500:a        | 28    | 42  | 17    | 117 | 264   | 214 | 115   | 114   | 35    |
| MCE-MIR_3797:fwd | 28    | 81  |       | 71  | 101   | 45  | 232   | 45    |       |
| MCE-MIR_1458:rev | 27    | 50  |       | 109 | 488   | 408 | 122   | 151   | 35    |
| MCE-MIR_1931:fwd | 27    | 64  |       | 75  | 84    | 44  | 188   | 46    | 19    |
| S-mmu-mir-30c-2  | 27    | 108 |       | 88  | 49    | 26  | 145   | 30    |       |
| MCE-MIR_1478:fwd | 27    |     |       | 66  | 158   | 128 | 118   | 99    | 27    |
| cand340          | 27    | 39  |       | 61  | 83    | 164 | 110   | 89    | 53    |
| MCE-MIR_2566:fwd | 27    | 41  |       | 146 | 125   | 75  | 93    | 59    | 19    |
| MCE-MIR_4932:rev | 27    | 68  |       | 30  | 29    |     |       |       |       |
| cand135:a        | 27    |     | 23    | 181 | 53    | 45  |       | 37    |       |
| MCE-MIR_5143:rev | 27    | 54  |       | 26  | 45    | 84  |       | 41    |       |
| MCE-MIR_1495:fwd | 27    |     |       | 47  | 46    | 79  | 28    | 88    |       |
| mmu-mir-412      | 27    | 53  | 17    | 56  | 122   | 148 | 213   | 129   | 24    |
| MCE-MIR_3407:rev | 26    |     |       | 98  | 87    | 112 | 127   | 85    |       |
| mmu-mir-450      | 26    | 53  | 12    | 139 | 79    | 54  | 133   | 765   | 53    |
| MCE-MIR_3474:rev | 26    | 36  |       | 190 | 587   | 482 | 447   | 234   | 31    |
| S-mmu-mir-134    | 26    | 47  |       | 66  | 131   | 97  | 122   | 93    | 28    |

| ES Time:          | Day 0 |     | Day 1 |     | Day 3 |       |       | Day 6  |       |
|-------------------|-------|-----|-------|-----|-------|-------|-------|--------|-------|
| Array Chip ID:    | 210   | 357 | 124   | 216 | 217   | 222   | 356   | 222    | 245   |
| mmu-mir-350       | 26    | 113 | 42    | 313 | 146   | 84    | 143   | 118    | 18    |
| cand275           | 26    | 72  | 26    | 211 | 134   | 257   | 332   | 95     | 20    |
| MIR103            | 26    | 43  |       | 39  | 87    | 66    | 36    | 58     | 44    |
| MCE-MIR_3624: fwd | 26    | 48  | 14    | 26  | 35    | 42    | 27    | 63     | 22    |
| S-mmu-mir-200b    | 26    | 45  |       | 92  | 83    | 64    | 87    | 27     |       |
| MCE-MIR_2364: rev | 26    | 98  | 10    | 46  | 32    | 50    | 67    | 35     |       |
| MCE-MIR_4383: rev | 26    |     |       | 81  | 61    |       | 88    | 21     |       |
| MCE-MIR_4726: rev | 26    | 95  |       | 82  | 66    | 60    | 96    | 40     | 28    |
| MCE-MIR_5033: rev | 25    |     |       | 36  | 25    |       | 27    | 11     |       |
| cand718: a        | 25    | 32  |       | 28  | 45    | 62    | 37    | 41     |       |
| S-mmu-mir-124a-1  | 25    |     |       | 31  | 28    | 34    | 16    | 37     | 17    |
| cand6             | 25    | 39  |       | 43  | 67    | 64    | 58    | 54     | 23    |
| MCE-MIR_4745: fwd | 25    | 45  | 9     | 33  | 31    | 53    | 41    | 25     |       |
| MCE-MIR_2661: rev | 25    | 52  |       | 102 | 66    | 74    | 109   | 50     | 31    |
| mmu-mir-133a      | 25    | 69  |       | 32  | 36    | 27    | 90    | 29     |       |
| S-mmu-mir-382     | 25    | 36  |       | 122 | 138   | 81    | 69    | 178    | 46    |
| MCE-MIR_4675: fwd | 25    | 46  |       | 118 | 57    | 43    | 176   | 36     |       |
| MCE-MIR_3695: fwd | 25    | 41  | 10    | 38  | 23    |       | 32    |        |       |
| S-mmu-mir-181c    | 25    | 30  |       | 83  | 25    | 19    | 18    | 34     |       |
| S-mmu-mir-22      | 25    | 86  |       | 116 | 94    | 43    | 111   | 33     | 21    |
| MCE-MIR_3471: rev | 24    |     |       | 57  | 125   | 75    | 107   | 99     | 74    |
| MCE-MIR_2474: rev | 24    | 71  |       | 54  | 39    | 45    | 100   | 34     |       |
| MCE-MIR_4239: rev | 24    | 34  |       | 65  | 86    | 46    | 137   | 42     |       |
| cand157           | 24    | 80  | 30    | 49  | 43    | 61    | 57    | 974    | 147   |
| mmu-mir-146       | 24    | 74  | 14    | 42  | 177   | 100   | 274   | 59     | 29    |
| mmu-mir-503       | 24    | 58  |       | 65  | 252   | 241   | 180   | 763    | 195   |
| MCE-MIR_293: fwd  | 24    | 50  |       | 83  | 120   | 89    | 174   | 44     |       |
| MCE-MIR_4711: fwd | 24    |     |       | 21  | 21    | 31    |       | 64     |       |
| mmu-mir-211       | 24    |     |       | 21  | 53    | 67    | 26    | 46     |       |
| mmu-mir-486       | 24    | 45  |       | 62  | 49    | 59    | 83    | 72     | 28    |
| MCE-MIR_871: fwd  | 23    |     |       | 18  |       | 30    |       | 33     |       |
| mmu-mir-133b      | 23    | 55  |       | 37  | 41    | 43    | 96    | 38     |       |
| S-mmu-mir-370     | 23    | 40  |       | 61  | 147   | 111   | 155   | 120    | 27    |
| S-mmu-mir-92-1    | 23    | 51  |       | 44  | 39    | 34    | 51    | 23     |       |
| MCE-MIR_4738: fwd | 23    | 45  |       | 38  | 51    | 31    | 84    |        |       |
| cand705           | 23    | 67  | 14    | 29  | 47    | 67    | 201   | 48     | 20    |
| mmu-mir-34c       | 22    |     |       | 92  | 65    | 52    | 23    | 70     |       |
| MIR75             | 22    | 86  | 16    | 189 | 1,850 | 1,283 | 1,569 | 10,056 | 1,847 |

| ES Time:          | Day 0 |     | Day 1 |     | Day 3 |       |       | Day 6  |       |
|-------------------|-------|-----|-------|-----|-------|-------|-------|--------|-------|
| Array Chip ID:    | 210   | 357 | 124   | 216 | 217   | 222   | 356   | 222    | 245   |
| S-mmu-mir-103-1   | 22    | 31  |       | 45  | 42    | 60    | 24    | 47     |       |
| mmu-mir-128b      | 22    | 112 | 18    | 78  | 62    | 33    | 120   | 72     | 19    |
| MCE-MIR_4179:rev  | 22    |     |       | 27  | 246   | 51    | 48    | 56     |       |
| S-mmu-mir-351     | 22    |     |       | 49  | 273   | 244   | 165   | 474    | 148   |
| MCE-MIR_3646:rev  | 22    | 32  |       | 40  | 106   | 56    | 65    | 31     |       |
| cand13            | 22    | 49  |       | 149 | 71    | 123   | 75    | 38     | 17    |
| S-mmu-mir-125b-1  | 22    | 27  |       | 55  | 91    | 99    | 145   | 313    | 92    |
| cand276:b         | 22    | 30  | 16    | 79  | 19    |       |       | 18     |       |
| cand664           | 22    |     |       | 53  | 45    | 49    | 146   | 32     |       |
| S-mmu-mir-15a     | 22    | 52  |       | 28  | 51    | 55    | 17    | 34     | 18    |
| cand90:a          | 21    | 45  | 123   | 139 | 2,130 | 1,840 | 2,590 | 23,785 | 4,592 |
| MCE-MIR_3886:rev  | 21    |     |       | 48  | 28    | 20    | 51    | 13     |       |
| MCE-MIR_5008:rev  | 21    | 55  |       | 29  | 25    |       | 43    |        |       |
| mmu-let-7g        | 21    | 73  | 34    | 60  | 25    | 27    | 57    | 1,443  | 164   |
| cand146           | 20    | 36  | 15    | 46  | 160   | 92    | 72    | 61     | 73    |
| cand572:b         | 20    |     | 18    | 37  | 35    | 28    | 42    | 17     |       |
| MCE-MIR_4762: fwd | 20    | 51  |       | 14  |       |       | 35    |        |       |
| cand224           | 20    |     |       | 66  | 79    | 48    | 54    | 21     |       |
| cand619           | 20    |     |       | 81  | 131   | 90    | 126   | 62     | 19    |
| S-mmu-mir-30b     | 20    | 82  |       | 36  | 46    | 20    | 112   |        |       |
| MCE-MIR_4497:rev  | 19    | 115 |       | 104 | 30    | 38    | 304   | 41     |       |
| S-mmu-mir-300     | 19    | 64  |       | 29  | 92    | 30    | 150   | 52     | 33    |
| mmu-mir-30a-3p    | 19    | 99  | 18    | 89  | 81    | 51    | 125   | 165    | 29    |
| MIR41             | 19    | 38  | 11    | 73  | 76    | 22    | 43    | 25     |       |
| S-mmu-mir-124a-3  | 19    | 34  |       | 33  | 31    | 44    | 23    | 42     |       |
| cand149:a         | 19    | 53  |       | 36  | 40    | 37    | 74    | 64     |       |
| S-mmu-mir-218-1   | 18    | 32  |       | 24  | 22    | 51    | 16    | 80     | 19    |
| cand529           | 18    |     |       | 60  | 200   | 115   | 92    | 57     | 27    |
| MCE-MIR_3793:rev  | 18    |     |       | 120 | 205   | 51    | 145   | 74     |       |
| MCE-MIR_4022: fwd | 18    |     |       | 48  | 83    | 47    | 82    | 28     | 20    |
| MCE-MIR_4554:rev  | 18    | 82  |       | 37  | 34    | 22    | 61    | 22     |       |
| S-mmu-mir-135a-1  | 18    |     |       | 24  | 18    | 30    | 25    | 46     |       |
| cand349:a         | 18    | 54  |       | 47  | 58    | 46    | 113   | 137    | 20    |
| mmu-mir-362       | 18    |     | 18    | 71  | 90    | 62    | 46    | 106    | 28    |
| MCE-MIR_3059:rev  | 18    |     |       | 26  | 45    | 60    |       | 36     |       |
| cand415           | 18    |     |       | 17  | 45    | 41    | 31    | 51     | 25    |
| mmu-mir-339       | 18    |     | 10    | 70  | 37    | 25    | 33    | 30     |       |
| MCE-MIR_1283:rev  | 18    | 178 |       | 380 | 46    | 136   | 603   | 43     |       |

| ES Time:         | Day 0 |     | Day 1 |     | Day 3 |     |       | Day 6 |     |
|------------------|-------|-----|-------|-----|-------|-----|-------|-------|-----|
| Array Chip ID:   | 210   | 357 | 124   | 216 | 217   | 222 | 356   | 222   | 245 |
| cand302:b        | 18    |     |       | 36  | 124   | 61  | 45    | 34    | 22  |
| cand137:b        | 17    | 50  |       | 79  | 21    | 33  | 35    | 55    |     |
| cand152:a        | 17    | 43  |       | 35  | 43    | 32  | 125   | 60    | 34  |
| MCE-MIR_809:fwd  | 17    |     |       | 30  | 23    | 23  | 41    |       |     |
| MCE-MIR_2192:rev | 17    | 50  |       | 30  | 15    |     | 51    |       |     |
| MCE-MIR_2894:fwd | 17    |     |       | 34  | 40    | 18  | 63    | 24    |     |
| mmu-mir-30e      | 17    | 60  | 10    | 270 | 89    | 36  | 24    | 38    |     |
| S-mmu-mir-27b    | 17    | 50  |       | 33  | 32    |     | 49    | 33    |     |
| MCE-MIR_4236:rev | 17    |     |       | 39  | 57    |     | 95    |       |     |
| MCE-MIR_4034:rev | 17    |     |       | 42  | 54    | 40  | 109   | 40    | 20  |
| MCE-MIR_2166:rev | 17    | 49  |       | 39  | 26    |     | 58    | 24    |     |
| cand309          | 17    |     | 14    | 15  | 51    | 44  | 23    | 27    | 21  |
| cand351          | 17    | 100 |       | 75  | 33    | 28  | 175   | 76    |     |
| MCE-MIR_1697:fwd | 17    |     |       | 39  | 38    | 31  |       | 13    |     |
| MCE-MIR_4069:rev | 17    |     |       | 19  | 41    | 26  | 46    | 29    |     |
| mmu-mir-468      | 17    |     |       | 21  | 27    | 17  | 20    | 38    |     |
| mmu-mir-132      | 17    | 35  | 12    | 55  | 34    | 44  | 82    | 332   | 37  |
| cand262          | 17    | 29  |       | 84  | 12    |     |       | 49    |     |
| S-mmu-mir-486    | 17    | 58  |       | 253 | 22    | 89  | 131   | 23    |     |
| S-mmu-mir-188    | 17    | 37  |       | 29  |       | 24  | 37    |       |     |
| MCE-MIR_2501:fwd | 17    |     |       | 35  | 64    | 59  | 61    | 79    | 23  |
| MCE-MIR_3226:fwd | 17    | 49  |       | 63  | 56    | 43  | 85    | 44    | 18  |
| cand184          | 16    | 39  |       | 42  | 30    | 41  |       | 77    |     |
| S-mmu-mir-124a-2 | 16    |     |       | 25  | 32    | 41  | 18    | 42    | 17  |
| mmu-mir-142-5p   | 16    |     |       | 34  |       |     |       | 19    |     |
| MCE-MIR_5180:rev | 16    |     |       | 22  | 24    | 19  | 26    |       |     |
| MCE-MIR_4893:fwd | 16    | 37  |       | 21  | 31    | 27  | 30    | 28    |     |
| MCE-MIR_5105:rev | 16    | 39  |       | 20  | 47    | 18  | 57    | 22    |     |
| MCE-MIR_407:fwd  | 16    |     |       |     | 14    | 22  |       | 22    |     |
| S-mmu-mir-135a-2 | 16    |     |       | 24  | 180   | 145 | 148   | 400   | 84  |
| MCE-MIR_1059:fwd | 16    |     |       | 43  | 99    | 31  | 53    | 23    |     |
| mmu-let-7f       | 16    | 105 | 41    | 78  | 65    | 137 | 232   | 5,769 | 549 |
| MCE-MIR_364:fwd  | 16    | 37  |       | 55  | 236   | 52  | 157   | 29    | 23  |
| MCE-MIR_5236:rev | 16    |     |       | 30  | 21    | 24  | 20    | 16    |     |
| MCE-MIR_3113:fwd | 16    |     |       | 35  | 30    | 29  | 37    | 23    |     |
| mmu-mir-203      | 16    | 38  | 11    | 35  | 54    | 44  | 85    | 141   | 36  |
| mmu-mir-193      | 16    | 37  |       | 31  | 20    | 26  | 27    | 41    |     |
| S-mmu-mir-219-2  | 16    | 34  |       | 56  | 1,195 | 895 | 1,090 | 1,398 | 317 |

| ES Time:          | Day 0 |       | Day 1 |       | Day 3 |       |        | Day 6 |       |
|-------------------|-------|-------|-------|-------|-------|-------|--------|-------|-------|
| Array Chip ID:    | 210   | 357   | 124   | 216   | 217   | 222   | 356    | 222   | 245   |
| mmu-mir-452       | 15    |       |       | 31    | 37    | 20    | 52     | 23    |       |
| S-mmu-mir-10b     | 15    |       |       | 25    | 178   | 219   | 74     | 1,079 | 319   |
| mmu-mir-212       | 15    | 67    | 11    | 29    | 46    | 35    | 53     | 130   | 34    |
| S-mmu-let-7i      | 15    |       |       | 17    | 26    | 30    |        | 26    |       |
| MCE-MIR_1689:rev  | 15    |       |       | 27    | 23    | 21    | 31     | 10    |       |
| mmu-mir-546       | 15    | 123   |       | 329   | 179   | 119   | 247    | 27    |       |
| cand200           | 15    | 4,459 | 19    | 1,585 | 695   | 1,492 | 11,473 | 211   | 82    |
| S-mmu-mir-196a-2  | 15    |       |       |       | 20    | 23    |        |       |       |
| MCE-MIR_1192:rev  | 14    |       |       |       | 12    |       | 20     | 30    |       |
| mmu-mir-483       | 14    | 39    |       | 22    | 28    | 39    | 51     | 25    |       |
| MCE-MIR_1788: fwd | 14    | 64    |       | 44    | 22    | 31    | 60     | 14    |       |
| S-mmu-let-7g      | 14    |       |       | 17    | 32    | 38    | 17     | 27    |       |
| mmu-mir-380-5p    | 14    | 38    |       | 33    | 75    | 33    | 78     | 67    |       |
| cand100:b         | 14    |       |       | 19    |       |       |        |       |       |
| cand35            | 14    | 41    |       | 95    | 32    | 53    | 76     | 33    |       |
| MCE-MIR_1356: fwd | 14    | 41    |       | 49    | 95    | 44    | 86     | 26    | 19    |
| S-mmu-mir-7-1     | 14    |       |       | 58    | 37    | 31    | 41     | 21    |       |
| MCE-MIR_1811:rev  | 14    |       |       | 26    | 24    | 30    | 27     | 20    |       |
| mmu-mir-194       | 13    | 52    | 16    | 68    | 27    | 17    | 42     | 22    |       |
| cand91:b          | 13    |       |       | 66    | 44    | 59    | 94     | 44    |       |
| MCE-MIR_993:rev   | 13    |       |       | 22    | 65    | 31    | 23     | 32    | 51    |
| MCE-MIR_1412: fwd | 13    |       |       | 13    | 18    | 17    |        |       |       |
| mmu-let-7i        | 13    | 51    |       | 35    | 28    | 28    | 33     | 1,400 | 277   |
| S-mmu-mir-381     | 13    |       |       | 46    |       |       | 24     |       |       |
| MCE-MIR_1226: fwd | 13    |       |       | 49    |       |       | 41     |       |       |
| MCE-MIR_4015: fwd | 13    |       | 15    |       | 11    | 79    |        | 51    | 23    |
| MCE-MIR_5122:rev  | 13    | 42    |       | 21    | 18    | 19    | 33     |       |       |
| MCE-MIR_162: fwd  | 13    |       |       | 29    | 73    | 37    | 68     | 17    | 18    |
| MCE-MIR_3888:rev  | 13    | 44    |       | 54    | 58    | 47    | 90     | 45    |       |
| MCE-MIR_6026: fwd | 13    | 48    |       | 17    | 15    | 18    | 42     | 27    |       |
| mmu-mir-199a      | 13    | 44    | 13    | 53    | 666   | 433   | 609    | 9,409 | 1,899 |
| S-mmu-mir-409     | 13    | 55    |       | 104   | 94    | 55    | 154    | 92    | 25    |
| cand64            | 13    |       |       | 27    | 143   | 56    | 55     | 39    | 28    |
| MIR141            | 13    | 50    |       | 64    | 131   | 109   | 129    | 347   | 71    |
| cand120           | 13    | 43    |       | 23    | 22    | 26    | 30     | 63    |       |
| MCE-MIR_6001:rev  | 13    |       |       | 28    | 44    | 30    | 76     |       |       |
| S-mmu-mir-106a    | 12    |       |       | 31    | 12    |       |        | 18    |       |
| cand348           | 12    | 53    | 28    | 62    |       | 61    | 63     | 2,439 | 111   |





| ES Time:          | Day 0 |     | Day 1 |     | Day 3 |       |       | Day 6  |       |
|-------------------|-------|-----|-------|-----|-------|-------|-------|--------|-------|
| Array Chip ID:    | 210   | 357 | 124   | 216 | 217   | 222   | 356   | 222    | 245   |
| cand302:a         |       |     |       | 59  | 22    | 43    | 49    |        |       |
| cand324:b         |       |     |       | 63  | 18    |       | 23    | 17     |       |
| cand349:b         |       |     |       |     |       |       |       |        |       |
| cand352:a         |       |     |       |     |       |       |       |        |       |
| cand352:b         |       |     |       |     | 17    |       |       | 25     |       |
| cand361           |       |     |       |     | 19    | 19    | 24    |        |       |
| cand375           |       |     | 23    | 83  | 5,492 | 3,493 | 8,689 | 22,023 | 4,785 |
| cand40            |       |     |       |     |       |       |       | 12     |       |
| cand427           |       |     |       |     |       |       | 45    |        |       |
| cand492           |       | 467 |       | 93  |       | 26    | 1,120 |        |       |
| cand497:b         |       |     |       | 17  |       |       |       |        |       |
| cand50            |       |     |       |     |       |       |       |        |       |
| cand500:b         |       |     |       | 15  | 18    | 20    | 33    | 24     |       |
| cand524           |       |     |       |     |       |       |       |        |       |
| cand549           |       |     |       |     |       | 17    |       |        |       |
| cand585           |       |     |       |     | 20    |       |       |        |       |
| cand590           |       |     |       |     |       |       |       |        |       |
| cand614           |       |     |       | 13  |       |       |       |        |       |
| cand650           |       |     |       | 18  | 22    | 20    | 26    | 24     |       |
| cand669           |       |     |       | 45  | 51    | 27    | 32    | 24     |       |
| cand7             |       | 584 |       | 166 | 52    | 29    | 1,129 |        |       |
| cand70            |       |     |       | 39  | 57    | 39    | 211   | 23     |       |
| cand708:a         |       |     |       | 16  |       |       | 47    |        |       |
| cand82            |       |     |       |     |       |       |       |        |       |
| MCE-MIR_1052:rev  |       |     |       |     | 26    | 19    | 23    | 22     |       |
| MCE-MIR_1259:rev  |       |     |       |     |       |       |       |        |       |
| MCE-MIR_1264:rev  |       |     |       | 7   |       |       |       |        |       |
| MCE-MIR_1269:rev  |       |     |       |     |       |       |       |        |       |
| MCE-MIR_1311:rev  |       |     |       | 13  | 35    |       | 67    |        |       |
| MCE-MIR_1356:rev  |       |     |       | 13  | 16    |       | 35    |        |       |
| MCE-MIR_1365:rev  |       | 36  |       | 19  | 29    | 34    | 53    |        |       |
| MCE-MIR_1401: fwd |       |     |       |     |       |       |       |        |       |
| MCE-MIR_1433: fwd |       |     |       | 15  | 36    | 21    |       | 18     |       |
| MCE-MIR_1433: rev |       |     |       |     | 16    |       |       | 11     |       |
| MCE-MIR_1442: fwd |       |     |       |     |       |       |       |        |       |
| MCE-MIR_1482: rev |       |     |       | 18  | 19    | 42    | 30    | 19     |       |
| MCE-MIR_151: fwd  |       |     |       | 10  | 13    | 19    | 26    |        |       |
| MCE-MIR_1546: rev |       |     |       | 19  | 35    |       | 32    |        |       |

| ES Time:          | Day 0 |     | Day 1 |     | Day 3 |     |     | Day 6 |     |
|-------------------|-------|-----|-------|-----|-------|-----|-----|-------|-----|
| Array Chip ID:    | 210   | 357 | 124   | 216 | 217   | 222 | 356 | 222   | 245 |
| MCE-MIR_1642:rev  |       |     |       | 11  | 19    |     |     |       |     |
| MCE-MIR_1645:rev  |       |     |       | 20  | 15    |     | 19  |       |     |
| MCE-MIR_1679: fwd |       |     |       |     | 15    |     |     |       |     |
| MCE-MIR_1710:rev  |       |     |       |     |       |     |     |       |     |
| MCE-MIR_1786: fwd |       |     |       | 16  |       |     |     |       |     |
| MCE-MIR_188: fwd  |       |     |       |     |       |     |     |       |     |
| MCE-MIR_1905:rev  |       |     |       |     |       |     |     |       |     |
| MCE-MIR_1929: fwd |       |     |       |     |       |     |     |       |     |
| MCE-MIR_1998: fwd |       |     |       | 10  |       | 21  |     |       |     |
| MCE-MIR_2087:rev  |       |     |       |     |       |     |     |       |     |
| MCE-MIR_2166: fwd |       | 40  |       | 11  |       |     |     |       |     |
| MCE-MIR_2173:rev  |       | 50  |       | 33  | 39    |     | 45  |       |     |
| MCE-MIR_2197: fwd |       |     |       |     |       |     |     |       |     |
| MCE-MIR_2198: fwd |       |     |       |     |       |     |     |       |     |
| MCE-MIR_2205: fwd |       |     |       |     |       |     |     |       |     |
| MCE-MIR_2288: fwd |       |     |       |     |       |     |     |       |     |
| MCE-MIR_2339: fwd |       | 49  |       |     | 20    |     | 31  |       |     |
| MCE-MIR_2339:rev  |       |     |       |     |       |     | 23  |       |     |
| MCE-MIR_2371: fwd |       |     |       |     |       |     |     |       |     |
| MCE-MIR_2371:rev  |       |     |       |     |       |     |     |       |     |
| MCE-MIR_2417: fwd |       |     |       |     |       |     |     |       |     |
| MCE-MIR_2419: fwd |       |     |       |     |       |     |     |       |     |
| MCE-MIR_2522:rev  |       |     |       |     |       |     |     |       |     |
| MCE-MIR_2566:rev  |       | 32  |       |     |       | 20  | 20  | 13    |     |
| MCE-MIR_2624:rev  |       |     |       | 11  |       |     |     |       |     |
| MCE-MIR_2691:rev  |       |     |       |     |       |     |     |       |     |
| MCE-MIR_2798: fwd |       |     |       |     |       |     |     |       |     |
| MCE-MIR_281:rev   |       |     |       |     |       |     |     |       |     |
| MCE-MIR_2902: fwd |       | 60  |       |     |       | 19  | 54  |       |     |
| MCE-MIR_291:rev   |       |     |       |     |       |     |     |       |     |
| MCE-MIR_293:rev   |       |     |       | 12  |       | 48  |     | 19    |     |
| MCE-MIR_3007:rev  |       |     |       |     |       |     |     |       |     |
| MCE-MIR_3032: fwd |       |     |       |     |       |     |     |       |     |
| MCE-MIR_3048:rev  |       |     |       |     |       |     |     |       |     |
| MCE-MIR_3057: fwd |       |     |       | 12  | 16    |     | 37  |       |     |
| MCE-MIR_3057:rev  |       |     |       |     |       |     |     |       |     |
| MCE-MIR_3084: fwd |       |     |       |     |       |     | 37  |       |     |
| MCE-MIR_3330: fwd |       |     |       |     | 18    |     |     |       |     |





| ES Time:         | Day 0 |     | Day 1 |     | Day 3  |       |        | Day 6  |        |
|------------------|-------|-----|-------|-----|--------|-------|--------|--------|--------|
| Array Chip ID:   | 210   | 357 | 124   | 216 | 217    | 222   | 356    | 222    | 245    |
| MCE-MIR_5712:rev |       | 29  |       |     | 15     |       |        |        |        |
| MCE-MIR_5864:fwd |       |     |       |     |        |       |        |        |        |
| MCE-MIR_5970:rev |       |     |       | 20  | 15     |       | 29     | 10     |        |
| MCE-MIR_6033:fwd |       |     |       | 10  | 14     |       | 39     |        |        |
| MCE-MIR_6034:rev |       | 52  |       | 12  |        |       | 26     |        |        |
| MCE-MIR_6120:fwd |       |     |       |     |        |       |        |        |        |
| MCE-MIR_689:rev  |       |     |       |     |        |       |        |        |        |
| MCE-MIR_774:rev  |       |     |       |     |        |       |        |        |        |
| MCE-MIR_782:rev  |       |     |       |     |        |       |        |        |        |
| MCE-MIR_81:fwd   |       |     |       |     |        |       |        |        |        |
| MCE-MIR_855:fwd  |       |     |       | 25  |        |       | 25     |        |        |
| MCE-MIR_855:rev  |       |     |       |     |        |       |        |        |        |
| MCE-MIR_871:rev  |       |     |       |     |        |       |        |        |        |
| MCE-MIR_946:rev  |       |     |       |     |        |       |        |        |        |
| MIR100           |       |     |       |     |        |       | 16     |        |        |
| MIR12            |       |     |       | 64  |        |       |        | 43     |        |
| MIR122           |       |     |       |     |        |       | 27     |        |        |
| MIR140           |       |     |       |     |        |       |        |        |        |
| MIR161           |       |     |       |     |        |       |        |        |        |
| MIR167           |       | 42  |       | 14  |        |       | 30     | 10     |        |
| MIR169           |       |     |       |     |        |       |        |        |        |
| MIR177           |       |     |       |     |        |       | 36     |        |        |
| MIR180           |       |     |       |     |        |       |        |        |        |
| MIR184           |       | 39  |       |     |        | 20    |        |        |        |
| MIR188           |       |     |       |     |        |       |        |        |        |
| MIR201           |       | 33  |       | 18  |        |       | 64     |        |        |
| MIR220           |       |     |       | 10  |        |       |        |        |        |
| MIR237           |       |     |       |     |        |       |        |        |        |
| MIR255           |       |     |       |     |        |       |        |        |        |
| MIR35            |       |     |       | 15  | 1,460  | 1,086 | 1,581  | 7,265  | 1,980  |
| MIR47            |       |     |       | 14  | 16     |       | 36     | 26     |        |
| MIR52            |       |     |       |     |        |       |        | 11     |        |
| MIR71            |       |     |       |     |        |       |        |        |        |
| MIR77            |       |     |       | 10  | 195    | 168   | 577    | 12,526 | 1,312  |
| MIR79            |       |     |       |     |        |       |        |        |        |
| mmu-mir-1        |       |     |       | 21  |        |       |        |        |        |
| mmu-mir-100      |       |     |       | 23  | 905    | 745   | 1,730  | 7,242  | 1,061  |
| mmu-mir-10a      |       |     | 152   | 292 | 11,376 | 6,618 | 15,601 | 33,132 | 10,077 |

| ES Time:        | Day 0 |     | Day 1 |     | Day 3 |       |       | Day 6  |       |
|-----------------|-------|-----|-------|-----|-------|-------|-------|--------|-------|
| Array Chip ID:  | 210   | 357 | 124   | 216 | 217   | 222   | 356   | 222    | 245   |
| mmu-mir-10b     |       |     |       | 24  | 1,577 | 1,022 | 8,603 | 19,740 | 3,656 |
| mmu-mir-126-5p  |       |     |       | 9   |       |       |       |        |       |
| mmu-mir-135a    |       |     |       |     |       |       |       |        |       |
| mmu-mir-135b    |       | 33  |       | 18  |       |       |       |        |       |
| mmu-mir-136     |       |     |       |     |       |       |       |        |       |
| mmu-mir-137     |       |     |       |     |       |       |       |        |       |
| mmu-mir-138     |       |     |       |     | 34    |       | 30    |        |       |
| mmu-mir-139     |       |     |       | 14  |       |       |       |        |       |
| mmu-mir-140     |       |     |       | 26  |       |       |       |        |       |
| mmu-mir-141     |       |     |       | 15  |       |       |       |        |       |
| mmu-mir-142-3p  |       |     |       | 14  |       |       |       |        |       |
| mmu-mir-144     |       |     |       |     |       |       |       |        |       |
| mmu-mir-153     |       |     |       |     |       |       |       |        |       |
| mmu-mir-189     |       |     |       |     |       |       |       |        |       |
| mmu-mir-190     |       |     |       |     |       |       |       |        |       |
| mmu-mir-192     |       |     |       | 10  |       |       |       |        |       |
| mmu-mir-196a    |       |     |       | 15  |       |       | 32    |        |       |
| mmu-mir-196b    |       |     |       |     |       |       |       |        |       |
| mmu-mir-199a    |       | 35  |       | 32  | 97    | 86    | 59    | 729    | 113   |
| mmu-mir-199b    |       |     |       | 20  | 27    | 24    | 20    | 227    | 32    |
| mmu-mir-201     |       |     |       |     |       |       |       |        |       |
| mmu-mir-202     |       |     |       | 12  |       |       |       |        |       |
| mmu-mir-204     |       |     |       | 13  | 27    | 29    |       | 29     |       |
| mmu-mir-206     |       |     |       | 18  | 20    |       | 18    | 85     |       |
| mmu-mir-208     |       |     |       |     |       |       |       |        |       |
| mmu-mir-213     |       |     |       |     |       |       |       | 17     |       |
| mmu-mir-215     |       |     |       |     |       |       |       |        |       |
| mmu-mir-216     |       |     |       |     | 60    | 26    | 43    | 26     |       |
| mmu-mir-217     |       |     |       |     | 60    | 26    | 44    | 29     |       |
| mmu-mir-219     |       |     |       |     | 41    | 24    |       | 51     |       |
| mmu-mir-291b-3p |       |     |       |     |       |       |       |        |       |
| mmu-mir-29b     |       |     |       | 52  |       |       |       |        |       |
| mmu-mir-29c     |       | 35  |       | 51  | 19    |       | 38    |        |       |
| S-mmu-mir-302b  |       |     |       |     |       |       |       |        |       |
| S-mmu-mir-30e   |       |     |       | 8   | 9     |       | 23    |        |       |
| mmu-mir-32      |       |     |       |     |       |       |       |        |       |
| mmu-mir-322     |       |     |       | 21  | 159   | 95    | 155   | 673    | 134   |
| mmu-mir-325     |       |     |       | 15  | 24    | 17    | 27    | 22     |       |







| ES Time:        | Day 0 |     | Day 1 |     | Day 3 |     |     | Day 6 |     |
|-----------------|-------|-----|-------|-----|-------|-----|-----|-------|-----|
| Array Chip ID:  | 210   | 357 | 124   | 216 | 217   | 222 | 356 | 222   | 245 |
| S-mmu-mir-298   |       | 57  |       | 18  | 14    | 25  | 20  | 14    |     |
| S-mmu-mir-29a   |       |     |       |     |       |     |     |       |     |
| S-mmu-mir-29b-1 |       | 34  |       | 12  |       |     | 30  |       |     |
| S-mmu-mir-29b-2 |       | 31  |       | 11  | 14    |     | 28  |       |     |
| S-mmu-mir-31    |       |     |       |     |       |     |     |       |     |
| S-mmu-mir-32    |       |     |       | 12  |       |     |     |       |     |
| S-mmu-mir-33    |       |     |       |     |       |     |     |       |     |
| S-mmu-mir-330   |       |     |       | 42  | 19    |     | 25  | 27    |     |
| S-mmu-mir-331   |       |     |       | 30  | 19    | 17  |     | 17    |     |
| S-mmu-mir-335   |       |     |       |     |       |     |     |       |     |
| S-mmu-mir-338   |       |     |       |     |       |     |     |       |     |
| S-mmu-mir-339   |       |     |       | 41  | 33    |     |     |       |     |
| S-mmu-mir-350   |       |     |       | 11  | 13    |     |     | 16    |     |
| S-mmu-mir-448   |       |     |       |     |       |     |     |       |     |
| S-mmu-mir-449   |       | 27  |       | 15  |       |     |     |       |     |
| S-mmu-mir-451   |       |     |       |     |       |     |     |       |     |
| S-mmu-mir-466   |       |     |       | 14  |       |     |     |       |     |
| S-mmu-mir-468   |       |     |       |     |       |     |     |       |     |
| S-mmu-mir-471   |       |     |       | 18  |       |     | 28  |       |     |
| S-mmu-mir-96    |       |     |       |     |       |     | 14  |       |     |
| S-mmu-mir-98    |       |     |       |     |       |     |     |       |     |
| S-mmu-mir-99a   |       |     |       |     |       |     | 22  |       |     |

**Supplemental Table ST4C:** Mouse Array Version 2 data-GCNF-/-. This table contains the simple detectable values, which lists average signal values of all transcripts on the array, of the ES-GCNF -/- time series. Each array includes 545 MCE-MIR, 266 mmu-mir, 170 Cand, 46 MIR, and 177 S-mmu-mir. A total of 10 arrays were used in this study. This table represents results obtained with the <200 nt RNA probe from GCNF-/- ES cell line.

| GCNF-/- Time:     | Day 0  |        | Day 1  |        | Day 3  |        | Day 6  |         |
|-------------------|--------|--------|--------|--------|--------|--------|--------|---------|
| Array Chip ID:    | 204    | 210    | 124    | 217    | 356    | 357    | 245    | 246     |
| MCE-MIR_2563:rev  | 33,190 | 29,754 | 46,336 | 51,688 | 79,720 | 44,841 | 42,587 | 101,912 |
| mmu-mir-294       | 27,977 | 21,138 | 7,146  | 46,012 | 25,123 | 9,874  | 1,190  | 386     |
| MCE-MIR_5060:rev  | 27,442 | 29,011 | 24,596 | 41,783 | 38,577 | 23,439 | 28,398 | 88,804  |
| MCE-MIR_4453: fwd | 26,129 | 25,897 | 26,457 | 37,363 | 53,330 | 33,549 | 30,034 | 74,833  |
| cand706           | 24,686 | 26,552 | 21,761 | 40,348 | 49,020 | 25,318 | 24,668 | 79,735  |

| <b>GCNF-/- Time:</b>  | <b>Day 0</b> |            | <b>Day 1</b> |            | <b>Day 3</b> |            | <b>Day 6</b> |            |
|-----------------------|--------------|------------|--------------|------------|--------------|------------|--------------|------------|
| <b>Array Chip ID:</b> | <b>204</b>   | <b>210</b> | <b>124</b>   | <b>217</b> | <b>356</b>   | <b>357</b> | <b>245</b>   | <b>246</b> |
| MCE-MIR_3820:rev      | 24,390       | 25,743     | 23,626       | 39,464     | 33,795       | 20,734     | 23,817       | 67,341     |
| cand151               | 23,804       | 25,500     | 20,485       | 38,573     | 47,617       | 23,299     | 28,331       | 91,269     |
| cand516               | 23,341       | 24,063     | 21,294       | 37,881     | 43,507       | 21,392     | 29,286       | 85,350     |
| mmu-mir-292-3p        | 22,689       | 14,493     | 17,266       | 36,063     | 30,157       | 12,338     | 22,013       | 17,756     |
| MCE-MIR_1597:fwd      | 21,710       | 23,518     | 17,754       | 40,011     | 34,681       | 18,145     | 24,089       | 74,257     |
| MCE-MIR_1539:rev      | 20,571       | 20,068     | 18,520       | 34,543     | 32,501       | 19,650     | 16,672       | 32,560     |
| mmu-mir-293           | 17,630       | 12,067     | 13,487       | 30,530     | 22,292       | 9,695      | 8,031        | 7,233      |
| MCE-MIR_3571:rev      | 17,076       | 18,765     | 16,850       | 32,867     | 28,329       | 12,746     | 27,186       | 61,510     |
| MCE-MIR_4822:rev      | 16,950       | 14,575     | 12,689       | 19,539     | 35,179       | 23,691     | 10,848       | 14,609     |
| MCE-MIR_1773:fwd      | 15,755       | 15,518     | 16,100       | 29,407     | 31,042       | 16,596     | 21,729       | 45,838     |
| cand385               | 15,722       | 16,035     | 16,874       | 29,972     | 30,449       | 15,798     | 29,739       | 64,217     |
| MCE-MIR_1457:rev      | 15,717       | 16,362     | 15,278       | 25,873     | 27,735       | 15,689     | 11,984       | 18,342     |
| MCE-MIR_1394:rev      | 15,657       | 19,876     | 8,664        | 26,466     | 24,777       | 13,171     | 5,653        | 10,012     |
| MCE-MIR_3503:rev      | 15,122       | 13,894     | 12,740       | 20,510     | 12,915       | 7,188      | 15,372       | 23,984     |
| MCE-MIR_4274:fwd      | 14,984       | 15,521     | 28,549       | 35,668     | 47,343       | 23,205     | 45,424       | 84,335     |
| mmu-mir-290           | 14,766       | 11,153     | 10,893       | 29,731     | 17,092       | 8,908      | 7,499        | 4,871      |
| cand271               | 14,137       | 16,296     | 13,596       | 26,906     | 37,328       | 12,590     | 19,360       | 37,764     |
| MCE-MIR_5062:rev      | 13,520       | 13,498     | 13,609       | 24,820     | 20,420       | 9,990      | 19,137       | 34,286     |
| mmu-mir-291a-3p       | 13,146       | 11,019     | 1,844        | 13,431     | 3,376        | 2,001      | 555          | 244        |
| MCE-MIR_3191:rev      | 12,868       | 11,288     | 12,863       | 19,110     | 29,216       | 19,106     | 8,304        | 14,775     |
| MCE-MIR_2222:fwd      | 12,863       | 11,457     | 7,744        | 15,172     | 11,030       | 8,279      | 5,717        | 3,753      |
| MCE-MIR_1538:fwd      | 12,819       | 12,814     | 17,204       | 25,555     | 21,325       | 12,664     | 10,999       | 11,070     |
| MCE-MIR_3468:rev      | 12,456       | 11,866     | 13,187       | 20,420     | 23,630       | 13,049     | 19,168       | 31,566     |
| MCE-MIR_3190:rev      | 12,286       | 10,754     | 11,528       | 18,152     | 28,441       | 18,813     | 4,624        | 7,871      |
| cand78:b              | 12,269       | 9,221      | 8,242        | 18,344     | 15,385       | 9,763      | 18,949       | 24,034     |
| cand294               | 12,231       | 13,744     | 8,752        | 32,834     | 29,377       | 9,246      | 9,965        | 14,938     |
| MCE-MIR_968:fwd       | 11,791       | 12,149     | 9,786        | 21,673     | 18,094       | 10,274     | 4,028        | 4,590      |
| mmu-mir-295           | 11,704       | 8,174      | 6,508        | 20,792     | 10,250       | 4,879      | 5,106        | 2,560      |
| cand594               | 11,676       | 11,600     | 12,036       | 21,202     | 20,232       | 8,891      | 25,279       | 32,447     |
| MCE-MIR_3782:rev      | 11,671       | 10,491     | 11,150       | 24,876     | 20,780       | 9,803      | 22,603       | 43,740     |
| MCE-MIR_5367:rev      | 11,529       | 10,074     | 10,191       | 22,170     | 15,238       | 8,460      | 17,146       | 26,084     |
| mmu-mir-292-5p        | 11,526       | 7,902      | 9,716        | 20,711     | 14,739       | 7,571      | 4,119        | 2,300      |
| MCE-MIR_3111:fwd      | 11,292       | 8,530      | 15,377       | 13,869     | 23,820       | 16,896     | 23,241       | 18,756     |
| cand595:b             | 11,200       | 11,910     | 10,183       | 16,252     | 22,751       | 11,108     | 6,239        | 13,106     |
| cand186               | 11,069       | 12,064     | 6,332        | 16,447     | 15,745       | 8,020      | 11,452       | 20,501     |
| MCE-MIR_4861:fwd      | 10,946       | 9,932      | 8,193        | 15,919     | 20,935       | 11,553     | 3,314        | 4,356      |
| MCE-MIR_984:rev       | 10,814       | 10,596     | 13,655       | 18,142     | 18,123       | 12,012     | 17,459       | 28,361     |
| MCE-MIR_3491:rev      | 10,159       | 8,491      | 11,188       | 17,601     | 17,178       | 9,623      | 10,601       | 16,063     |

| <b>GCNF/- Time:</b>   | <b>Day 0</b> |            | <b>Day 1</b> |            | <b>Day 3</b> |            | <b>Day 6</b> |            |
|-----------------------|--------------|------------|--------------|------------|--------------|------------|--------------|------------|
| <b>Array Chip ID:</b> | <b>204</b>   | <b>210</b> | <b>124</b>   | <b>217</b> | <b>356</b>   | <b>357</b> | <b>245</b>   | <b>246</b> |
| MCE-MIR_254: fwd      | 10,023       | 9,504      | 11,374       | 18,413     | 20,214       | 12,249     | 13,572       | 17,254     |
| MCE-MIR_645: fwd      | 9,980        | 10,234     | 7,418        | 16,522     | 17,953       | 8,228      | 2,502        | 3,629      |
| MCE-MIR_995: rev      | 9,970        | 10,020     | 11,675       | 16,986     | 19,512       | 9,173      | 13,541       | 18,384     |
| cand692: b            | 9,864        | 7,441      | 6,787        | 15,836     | 14,468       | 8,203      | 13,159       | 18,193     |
| MCE-MIR_2164: rev     | 9,856        | 9,228      | 10,642       | 15,833     | 23,212       | 10,940     | 10,317       | 15,796     |
| MIR112                | 9,750        | 8,273      | 8,064        | 15,420     | 14,249       | 7,252      | 10,614       | 15,034     |
| mmu-mir-17-5p         | 9,472        | 9,701      | 9,825        | 21,638     | 8,625        | 6,044      | 2,652        | 2,580      |
| MCE-MIR_2388: rev     | 9,296        | 9,268      | 8,766        | 12,542     | 16,830       | 10,119     | 7,529        | 10,558     |
| cand489               | 9,232        | 7,821      | 10,780       | 20,060     | 15,306       | 8,049      | 19,211       | 31,677     |
| MCE-MIR_3502: rev     | 9,203        | 8,966      | 15,860       | 15,767     | 24,884       | 12,273     | 23,487       | 28,783     |
| MCE-MIR_5195: rev     | 8,986        | 7,966      | 7,994        | 16,557     | 20,957       | 8,495      | 11,432       | 16,886     |
| cand255               | 8,874        | 7,405      | 5,504        | 10,963     | 11,289       | 7,585      | 7,873        | 7,374      |
| mmu-mir-20a           | 8,722        | 8,936      | 7,744        | 19,621     | 7,881        | 4,994      | 1,873        | 1,876      |
| MCE-MIR_3416: rev     | 8,719        | 6,406      | 4,465        | 14,477     | 9,420        | 4,137      | 6,855        | 9,557      |
| MCE-MIR_3751: fwd     | 8,577        | 8,012      | 2,575        | 13,758     | 9,006        | 6,484      | 3,692        | 3,013      |
| MCE-MIR_5699: fwd     | 8,546        | 8,702      | 8,354        | 8,196      | 14,187       | 9,157      | 1,124        | 774        |
| MCE-MIR_321: rev      | 8,543        | 7,548      | 3,643        | 11,017     | 20,792       | 10,599     | 1,430        | 1,711      |
| cand306               | 8,527        | 7,825      | 7,690        | 12,516     | 17,518       | 9,112      | 7,176        | 13,582     |
| MCE-MIR_3155: fwd     | 8,506        | 5,806      | 13,619       | 13,044     | 22,973       | 15,415     | 20,180       | 18,701     |
| MCE-MIR_3626: rev     | 8,475        | 8,377      | 26,975       | 16,869     | 32,048       | 16,088     | 47,938       | 85,391     |
| MCE-MIR_5005: rev     | 8,472        | 7,109      | 9,759        | 15,452     | 16,096       | 10,880     | 5,519        | 6,425      |
| MCE-MIR_2169: rev     | 8,467        | 6,980      | 3,331        | 10,051     | 11,068       | 6,525      | 1,173        | 1,703      |
| MCE-MIR_4226: fwd     | 8,367        | 6,820      | 18,655       | 11,821     | 33,790       | 19,810     | 19,646       | 16,985     |
| MCE-MIR_3495: rev     | 8,341        | 10,013     | 3,072        | 17,346     | 9,400        | 2,548      | 8,666        | 16,075     |
| MCE-MIR_5374: fwd     | 8,278        | 10,716     | 5,181        | 19,967     | 11,310       | 5,835      | 1,386        | 2,851      |
| MCE-MIR_1504: rev     | 8,209        | 6,744      | 6,918        | 12,668     | 10,947       | 6,698      | 4,011        | 4,424      |
| MCE-MIR_1535: rev     | 8,205        | 7,033      | 8,099        | 17,262     | 13,858       | 6,967      | 16,686       | 26,097     |
| MCE-MIR_2999: fwd     | 8,181        | 5,838      | 3,635        | 11,702     | 19,022       | 9,282      | 1,593        | 1,253      |
| MCE-MIR_5606: fwd     | 8,179        | 6,998      | 8,575        | 12,609     | 11,361       | 8,052      | 4,889        | 4,459      |
| MCE-MIR_2310: rev     | 8,150        | 7,081      | 4,049        | 11,993     | 11,846       | 6,908      | 456          | 334        |
| MCE-MIR_1190: fwd     | 8,057        | 6,131      | 8,248        | 11,771     | 13,744       | 9,905      | 4,996        | 4,512      |
| cand667: a            | 8,054        | 6,417      | 6,013        | 9,837      | 14,039       | 6,860      | 5,534        | 4,855      |
| MCE-MIR_3147: fwd     | 8,029        | 5,756      | 6,842        | 12,534     | 12,545       | 7,020      | 11,220       | 13,407     |
| MCE-MIR_4854: rev     | 7,915        | 5,916      | 2,377        | 6,321      | 9,956        | 5,790      | 104          | 70         |
| cand648               | 7,889        | 6,142      |              | 5,501      | 16,878       | 11,772     | 540          | 309        |
| MIR88                 | 7,868        | 6,956      | 6,012        | 13,583     | 11,172       | 5,785      | 11,236       | 17,349     |
| MCE-MIR_3295: rev     | 7,826        | 5,338      | 8,588        | 14,277     | 12,743       | 7,332      | 13,006       | 15,561     |
| MCE-MIR_4625: fwd     | 7,811        | 6,483      | 8,546        | 11,460     | 14,308       | 9,094      | 5,251        | 4,855      |

| GCNF-/- Time:    | Day 0          |       | Day 1  |        | Day 3  |        | Day 6  |        |
|------------------|----------------|-------|--------|--------|--------|--------|--------|--------|
|                  | Array Chip ID: | 204   | 210    | 124    | 217    | 356    | 357    | 245    |
| cand11:b         | 7,740          | 6,836 | 7,393  | 13,836 | 11,038 | 5,980  | 11,490 | 13,851 |
| MCE-MIR_2337:fwd | 7,726          | 5,976 | 6,464  | 9,633  | 9,383  | 5,573  | 1,726  | 836    |
| MCE-MIR_4661:fwd | 7,658          | 6,838 | 6,676  | 8,843  | 15,328 | 9,558  | 2,094  | 1,431  |
| MCE-MIR_135:fwd  | 7,626          | 5,954 | 8,562  | 13,663 | 12,592 | 8,369  | 5,795  | 5,608  |
| MCE-MIR_335:fwd  | 7,570          | 5,431 | 9,773  | 14,684 | 17,003 | 10,264 | 10,047 | 12,488 |
| MCE-MIR_1038:fwd | 7,538          | 6,771 | 6,733  | 15,292 | 8,726  | 5,749  | 10,162 | 16,143 |
| MCE-MIR_3686:fwd | 7,523          | 5,927 | 4,587  | 13,288 | 7,826  | 3,559  | 8,570  | 10,379 |
| MCE-MIR_136:fwd  | 7,429          | 6,798 | 8,752  | 13,863 | 16,614 | 9,829  | 8,507  | 8,930  |
| MCE-MIR_1409:fwd | 7,329          | 5,705 | 9,977  | 14,906 | 16,117 | 7,990  | 14,245 | 17,653 |
| MCE-MIR_3837:rev | 7,287          | 5,234 | 4,821  | 7,505  | 15,060 | 9,396  | 1,083  | 618    |
| MCE-MIR_783:rev  | 7,194          | 5,891 | 8,781  | 12,340 | 14,007 | 8,585  | 5,355  | 4,137  |
| MCE-MIR_822:fwd  | 7,165          | 6,388 | 6,825  | 12,386 | 13,912 | 8,134  | 1,972  | 1,441  |
| MCE-MIR_2243:fwd | 7,154          | 5,520 | 4,987  | 11,368 | 10,737 | 4,601  | 8,705  | 12,578 |
| MCE-MIR_4297:fwd | 7,132          | 5,750 | 4,302  | 11,184 | 15,560 | 5,480  | 6,244  | 6,431  |
| MCE-MIR_5089:fwd | 7,113          | 5,247 | 5,987  | 8,841  | 13,676 | 9,191  | 3,585  | 1,417  |
| MCE-MIR_4673:fwd | 6,984          | 6,372 | 10,059 | 10,647 | 19,480 | 11,651 | 12,043 | 7,769  |
| MIR216           | 6,982          | 6,874 | 6,126  | 14,885 | 5,491  | 3,512  | 885    | 730    |
| cand371:a        | 6,921          | 5,749 | 5,391  | 14,854 | 13,054 | 5,111  | 16,281 | 24,192 |
| mmu-mir-302d     | 6,884          | 4,581 | 8,427  | 8,427  | 2,675  | 1,260  | 31     |        |
| mmu-mir-20b      | 6,833          | 6,998 | 6,304  | 17,876 | 5,911  | 3,855  | 1,084  | 891    |
| cand708:b        | 6,805          | 7,398 | 6,223  | 11,783 | 15,628 | 7,753  | 2,470  | 3,544  |
| MCE-MIR_3485:rev | 6,595          | 5,202 | 5,084  | 10,397 | 13,717 | 5,765  | 5,396  | 5,381  |
| MCE-MIR_3490:rev | 6,582          | 3,972 | 7,135  | 12,299 | 9,599  | 5,218  | 5,596  | 7,016  |
| MCE-MIR_4821:rev | 6,543          | 8,047 | 4,100  | 16,869 | 10,556 | 5,009  | 2,932  | 6,239  |
| MCE-MIR_4087:fwd | 6,498          | 4,960 | 5,745  | 13,984 | 9,384  | 5,076  | 6,744  | 5,714  |
| MCE-MIR_5061:rev | 6,477          | 5,012 | 3,489  | 12,170 | 9,617  | 3,589  | 7,574  | 11,658 |
| MCE-MIR_4820:rev | 6,460          | 7,727 | 4,169  | 16,789 | 11,512 | 5,209  | 3,469  | 7,328  |
| MIR70            | 6,446          | 4,205 | 7,759  | 7,944  | 2,126  | 1,176  | 32     |        |
| MCE-MIR_1506:rev | 6,442          | 4,644 | 7,576  | 11,397 | 13,439 | 7,971  | 4,365  | 4,431  |
| mmu-mir-106a     | 6,379          | 6,805 | 7,054  | 14,771 | 6,508  | 4,227  | 1,203  | 1,033  |
| MIR207           | 6,378          | 6,412 | 2,154  | 8,740  | 11,671 | 3,713  | 1,882  | 2,373  |
| MCE-MIR_2953:fwd | 6,361          | 5,948 | 23,366 | 12,590 | 35,695 | 18,505 | 34,249 | 29,053 |
| MCE-MIR_5109:rev | 6,246          | 6,032 | 6,389  | 14,503 | 11,764 | 5,443  | 11,791 | 17,875 |
| cand68           | 6,081          | 3,692 | 18,128 | 14,314 | 22,753 | 9,408  | 44,578 | 68,946 |
| MIR61            | 6,076          | 2,923 | 9,149  | 9,973  | 11,790 | 12,035 | 2,892  | 368    |
| MCE-MIR_4945:fwd | 5,933          | 4,099 | 2,762  | 11,485 | 5,541  | 1,765  | 8,249  | 9,681  |
| cand345          | 5,931          | 3,791 | 2,418  | 2,920  | 4,454  | 2,957  | 121    | 83     |
| MCE-MIR_2327:fwd | 5,925          | 3,936 | 1,480  | 10,436 | 2,314  | 863    | 1,161  | 1,236  |

| GCNF/- Time:     | Day 0          |       | Day 1  |        | Day 3  |        | Day 6  |        |
|------------------|----------------|-------|--------|--------|--------|--------|--------|--------|
|                  | Array Chip ID: | 204   | 210    | 124    | 217    | 356    | 357    | 245    |
| MCE-MIR_3334:fwd | 5,882          | 3,890 | 4,679  | 8,690  | 12,864 | 5,354  | 2,039  | 1,529  |
| cand279:b        | 5,860          | 4,133 | 4,151  | 10,980 | 8,243  | 3,966  | 7,173  | 7,311  |
| MCE-MIR_3573:rev | 5,814          | 2,399 | 610    | 18,674 | 956    | 171    | 6,649  | 11,673 |
| MCE-MIR_5403:fwd | 5,778          | 4,527 | 4,710  | 7,269  | 12,717 | 6,867  | 988    | 555    |
| MCE-MIR_3543:rev | 5,606          | 5,001 | 14,351 | 8,207  | 31,025 | 15,261 | 6,538  | 4,245  |
| MCE-MIR_2171:rev | 5,597          | 4,991 | 18,670 | 12,428 | 26,067 | 11,620 | 44,270 | 78,086 |
| MCE-MIR_5192:rev | 5,529          | 3,373 | 4,249  | 8,463  | 10,057 | 5,648  | 4,156  | 4,692  |
| cand647          | 5,525          | 3,452 | 3,670  | 6,616  | 2,550  | 2,026  | 2,208  | 913    |
| cand178:a        | 5,490          | 2,565 | 4,295  | 5,641  | 9,898  | 12,427 | 930    | 703    |
| MCE-MIR_1792:rev | 5,454          | 3,288 | 2,816  | 5,114  | 14,633 | 11,331 | 442    | 315    |
| MCE-MIR_5172:fwd | 5,307          | 4,444 | 1,708  | 22,998 | 6,555  | 874    | 7,679  | 20,178 |
| MCE-MIR_4743:fwd | 5,288          | 5,299 | 1,608  | 5,972  | 9,599  | 4,947  | 680    | 459    |
| MCE-MIR_3595:fwd | 5,222          | 4,365 | 3,743  | 7,308  | 8,243  | 4,245  | 8,793  | 8,258  |
| MCE-MIR_3470:rev | 5,172          | 3,253 | 3,544  | 8,042  | 8,907  | 4,154  | 8,204  | 8,354  |
| cand116          | 5,129          | 3,142 | 5,799  | 8,490  | 6,565  | 6,873  | 3,509  | 2,489  |
| MCE-MIR_3762:rev | 5,108          | 4,872 | 1,966  | 11,808 | 5,753  | 2,227  | 2,056  | 3,503  |
| mmu-mir-25       | 4,962          | 4,796 | 3,927  | 9,616  | 5,193  | 3,332  | 1,211  | 1,002  |
| cand523          | 4,955          | 3,492 | 8,036  | 4,360  | 13,495 | 8,471  | 1,624  | 834    |
| cand91:a         | 4,955          | 3,392 | 1,984  | 7,801  | 5,917  | 1,630  | 12,555 | 13,984 |
| cand613          | 4,884          | 3,953 | 4,390  | 10,781 | 12,814 | 4,857  | 6,935  | 9,383  |
| MCE-MIR_5030:rev | 4,814          | 3,745 | 1,051  | 5,820  | 11,544 | 5,748  | 377    | 310    |
| MCE-MIR_5544:rev | 4,805          | 4,872 | 1,686  | 4,640  | 15,912 | 8,280  | 473    | 219    |
| MCE-MIR_1365:fwd | 4,741          | 3,199 | 2,891  | 12,084 | 6,583  | 1,672  | 13,055 | 18,861 |
| MCE-MIR_5399:fwd | 4,722          | 3,104 | 2,488  | 6,785  | 5,515  | 2,807  | 6,596  | 5,296  |
| mmu-mir-92       | 4,698          | 3,914 | 5,637  | 7,932  | 5,210  | 3,266  | 1,011  | 806    |
| MCE-MIR_5291:fwd | 4,684          | 2,673 | 2,949  | 3,690  | 12,956 | 8,258  | 257    | 159    |
| cand616:a        | 4,662          | 3,762 | 1,100  | 13,851 | 7,441  | 1,958  | 10,486 | 14,792 |
| MIR165           | 4,639          | 2,923 | 4,254  | 8,616  | 6,281  | 4,126  | 4,291  | 5,490  |
| MCE-MIR_1778:fwd | 4,538          | 2,604 | 3,704  | 5,886  | 8,402  | 3,963  | 7,378  | 6,192  |
| cand231          | 4,518          | 3,072 | 2,936  | 8,723  | 11,033 | 3,556  | 20,459 | 23,532 |
| MIR136           | 4,469          | 3,794 | 5,061  | 7,006  | 5,349  | 2,931  | 870    | 752    |
| MCE-MIR_4462:fwd | 4,419          | 2,547 | 4,343  | 8,950  | 7,952  | 3,576  | 6,480  | 8,455  |
| mmu-mir-183      | 4,387          | 3,028 | 3,091  | 4,995  | 2,803  | 2,028  | 905    | 821    |
| mmu-mir-302b     | 4,304          | 2,148 | 4,725  | 3,735  | 1,685  | 876    |        |        |
| cand279:a        | 4,293          | 2,465 | 983    | 7,008  | 3,887  | 1,385  | 2,230  | 2,784  |
| mmu-mir-320      | 4,287          | 3,835 | 3,896  | 7,399  | 7,800  | 4,269  | 4,008  | 4,434  |
| cand179:a        | 4,193          | 5,356 | 3,283  | 8,128  | 11,025 | 5,015  | 402    | 538    |
| MCE-MIR_5079:rev | 4,180          | 3,186 | 2,108  | 10,016 | 6,273  | 2,373  | 10,950 | 14,487 |

| <b>GCNF-/- Time:</b>  | <b>Day 0</b> |            | <b>Day 1</b> |            | <b>Day 3</b> |            | <b>Day 6</b> |            |
|-----------------------|--------------|------------|--------------|------------|--------------|------------|--------------|------------|
| <b>Array Chip ID:</b> | <b>204</b>   | <b>210</b> | <b>124</b>   | <b>217</b> | <b>356</b>   | <b>357</b> | <b>245</b>   | <b>246</b> |
| MCE-MIR_3488:rev      | 4,153        | 2,297      | 2,837        | 7,157      | 7,970        | 3,109      | 2,197        | 2,564      |
| MCE-MIR_5440:fwd      | 4,146        | 2,801      | 3,090        | 5,198      | 10,099       | 6,957      | 648          | 333        |
| MCE-MIR_1352:fwd      | 4,138        | 4,316      | 1,535        | 12,378     | 6,045        | 2,369      | 1,894        | 4,273      |
| MCE-MIR_1371:fwd      | 4,135        | 2,358      | 3,320        | 9,241      | 6,728        | 3,110      | 4,161        | 3,870      |
| MCE-MIR_2698:rev      | 4,133        | 2,361      | 2,299        | 6,127      | 3,064        | 1,636      | 6,759        | 7,520      |
| cand718:b             | 4,128        | 2,362      | 8,503        | 9,283      | 11,879       | 4,210      | 13,157       | 11,599     |
| MCE-MIR_3484:rev      | 4,127        | 2,103      | 3,470        | 7,761      | 6,034        | 3,220      | 5,021        | 5,521      |
| mmu-mir-182           | 4,126        | 2,943      | 2,652        | 6,196      | 1,945        | 1,369      | 766          | 571        |
| MCE-MIR_1325:rev      | 4,096        | 2,172      | 3,930        | 7,353      | 4,767        | 3,628      | 1,968        | 1,538      |
| cand362               | 4,000        | 2,663      | 1,634        | 1,668      | 4,809        | 3,521      | 153          | 132        |
| MCE-MIR_4273:fwd      | 3,966        | 3,070      | 840          | 7,059      | 10,803       | 1,985      | 3,517        | 4,929      |
| MCE-MIR_3143:fwd      | 3,904        | 2,142      | 2,312        | 5,780      | 7,408        | 3,437      | 1,681        | 1,804      |
| MCE-MIR_5152:rev      | 3,856        | 2,419      | 2,723        | 6,161      | 8,070        | 4,604      | 339          | 223        |
| cand342:a             | 3,837        | 3,370      | 4,797        | 5,255      | 5,719        | 3,453      | 1,477        | 1,086      |
| MCE-MIR_3609:rev      | 3,819        | 2,486      | 3,849        | 6,426      | 6,735        | 3,291      | 4,263        | 3,063      |
| mmu-mir-93            | 3,796        | 3,296      | 2,602        | 7,386      | 3,427        | 2,142      | 1,570        | 1,459      |
| MCE-MIR_2139:fwd      | 3,791        | 2,556      | 1,567        | 8,259      | 3,067        | 1,115      | 9,398        | 13,047     |
| MCE-MIR_5057:fwd      | 3,736        | 2,869      | 1,621        | 3,679      | 6,449        | 4,799      | 277          | 163        |
| cand79                | 3,732        | 3,399      | 3,002        | 6,684      | 5,871        | 3,998      | 3,733        | 3,276      |
| MCE-MIR_3642:rev      | 3,725        | 2,630      | 3,899        | 6,110      | 9,782        | 5,473      | 2,039        | 1,811      |
| MCE-MIR_273:fwd       | 3,569        | 1,628      | 4,195        | 6,555      | 5,290        | 2,900      | 2,605        | 2,347      |
| cand156               | 3,562        | 1,632      | 2,565        | 1,342      | 13,554       | 10,255     | 487          | 307        |
| MCE-MIR_530:fwd       | 3,538        | 3,993      | 1,197        | 8,051      | 18,267       | 5,839      | 566          | 605        |
| mmu-mir-291b-5p       | 3,466        | 1,996      | 1,715        | 6,501      | 3,515        | 1,994      | 831          | 491        |
| cand425               | 3,429        | 2,568      | 2,164        | 3,296      | 5,744        | 2,571      | 967          | 916        |
| MCE-MIR_3429:rev      | 3,281        | 1,828      | 1,978        | 7,988      | 5,708        | 1,519      | 4,554        | 5,670      |
| MCE-MIR_4684:fwd      | 3,264        | 2,508      | 1,368        | 7,116      | 5,324        | 1,906      | 1,485        | 2,453      |
| cand172:b             | 3,236        | 2,922      | 3,710        | 4,909      | 4,660        | 3,304      | 883          | 682        |
| MCE-MIR_755:fwd       | 3,227        | 2,489      | 1,200        | 8,147      | 4,508        | 1,524      | 8,840        | 11,701     |
| cand588               | 3,212        | 1,637      | 851          | 12,197     | 3,224        | 1,161      | 4,583        | 3,352      |
| MCE-MIR_2714:rev      | 3,175        | 1,373      | 3,365        | 5,964      | 4,541        | 2,621      | 274          | 161        |
| MCE-MIR_5607:rev      | 3,157        | 2,676      | 741          | 3,478      | 1,236        | 1,609      | 115          | 59         |
| MCE-MIR_3847:fwd      | 3,128        | 2,473      | 1,932        | 5,367      | 11,903       | 7,711      | 3,740        | 2,218      |
| cand374:b             | 3,080        | 1,833      | 2,660        | 7,496      | 8,604        | 3,781      | 5,587        | 3,148      |
| mmu-mir-466           | 2,938        | 1,990      | 2,174        | 5,895      | 6,363        | 3,824      | 1,286        | 562        |
| mmu-mir-341           | 2,924        | 1,085      | 5,049        | 2,568      | 3,233        | 3,174      | 12,221       | 3,547      |
| MCE-MIR_1986:fwd      | 2,887        | 1,575      | 1,558        | 6,558      | 5,414        | 2,488      | 1,161        | 1,461      |
| MCE-MIR_1734:fwd      | 2,834        | 1,621      | 4,578        | 4,271      | 11,008       | 7,765      | 1,173        | 1,235      |

| <b>GCNF-/- Time:</b>  | <b>Day 0</b> |            | <b>Day 1</b> |            | <b>Day 3</b> |            | <b>Day 6</b> |            |
|-----------------------|--------------|------------|--------------|------------|--------------|------------|--------------|------------|
| <b>Array Chip ID:</b> | <b>204</b>   | <b>210</b> | <b>124</b>   | <b>217</b> | <b>356</b>   | <b>357</b> | <b>245</b>   | <b>246</b> |
| MCE-MIR_1784:fwd      | 2,814        | 1,932      | 774          | 4,722      | 10,029       | 6,180      | 72           |            |
| MCE-MIR_2817:fwd      | 2,812        | 1,987      | 7,698        | 7,524      | 9,394        | 2,994      | 18,320       | 31,481     |
| MCE-MIR_4922:fwd      | 2,759        | 1,667      | 912          | 3,470      | 9,351        | 5,840      | 419          | 311        |
| MCE-MIR_298:rev       | 2,705        | 1,242      | 1,347        | 4,794      | 6,232        | 2,790      | 2,299        | 1,980      |
| MCE-MIR_1536:rev      | 2,648        | 1,540      | 1,247        | 7,767      | 4,049        | 1,573      | 2,542        | 5,329      |
| MCE-MIR_2977:rev      | 2,610        | 1,370      | 132          | 3,471      | 5,148        | 2,369      | 273          | 205        |
| MCE-MIR_4913:rev      | 2,602        | 2,130      | 602          | 2,515      | 10,377       | 4,866      | 89           | 44         |
| cand418               | 2,594        | 1,735      | 550          | 3,292      | 3,022        | 1,760      | 243          | 242        |
| cand699               | 2,560        | 1,176      | 1,783        | 5,910      | 3,818        | 1,217      | 2,763        | 3,222      |
| mmu-mir-106b          | 2,539        | 2,756      | 1,061        | 6,469      | 1,969        | 1,303      | 849          | 763        |
| MCE-MIR_5389:fwd      | 2,494        | 1,867      | 1,504        | 4,261      | 9,869        | 6,863      | 3,377        | 1,664      |
| MCE-MIR_3685:rev      | 2,422        | 1,622      | 1,730        | 4,200      | 3,287        | 2,119      | 3,616        | 1,369      |
| cand617               | 2,403        | 1,689      | 1,546        | 1,704      | 7,420        | 3,564      | 844          | 868        |
| MCE-MIR_3531:rev      | 2,389        | 832        | 1,861        | 4,650      | 3,348        | 1,523      | 1,519        | 1,413      |
| mmu-mir-291a-5p       | 2,388        | 1,429      | 1,082        | 4,406      | 2,335        | 1,289      | 390          | 129        |
| cand252               | 2,374        | 2,243      | 3,128        | 4,677      | 2,166        | 1,529      | 1,703        | 1,222      |
| mmu-mir-302           | 2,360        | 1,008      | 1,451        | 1,755      | 312          | 194        |              |            |
| MCE-MIR_5141:rev      | 2,357        | 1,579      | 435          | 3,184      | 4,323        | 2,398      | 418          | 126        |
| mmu-mir-130a          | 2,337        | 2,455      | 1,001        | 6,103      | 2,219        | 1,379      | 1,420        | 1,267      |
| mmu-mir-130b          | 2,333        | 1,973      | 1,013        | 4,342      | 965          | 595        | 677          | 518        |
| MCE-MIR_451:rev       | 2,297        | 1,297      | 357          | 2,090      | 819          | 510        | 135          | 90         |
| mmu-mir-19b           | 2,267        | 4,172      | 181          | 4,380      | 325          | 187        | 191          | 248        |
| cand515               | 2,252        | 1,103      | 387          | 2,737      | 715          | 808        | 1,709        | 2,189      |
| MCE-MIR_2099:fwd      | 2,213        | 1,424      | 1,185        | 4,883      | 2,060        | 1,082      | 585          | 565        |
| MCE-MIR_3134:rev      | 2,173        | 1,323      | 4,340        | 2,755      | 23,189       | 15,971     | 2,197        | 782        |
| MCE-MIR_5354:rev      | 2,143        | 873        | 68           | 2,919      | 1,240        | 593        | 92           | 48         |
| MCE-MIR_1514:fwd      | 2,135        | 1,294      | 790          | 3,298      | 3,952        | 1,919      | 415          | 293        |
| mmu-mir-467           | 2,134        | 1,350      | 1,699        | 4,050      | 4,794        | 2,632      | 1,565        | 805        |
| MCE-MIR_810:rev       | 2,118        | 1,657      | 4,819        | 10,435     | 11,709       | 6,241      | 3,410        | 1,020      |
| MCE-MIR_2745:fwd      | 2,113        | 1,321      | 747          | 2,126      | 2,700        | 1,392      | 195          | 109        |
| MCE-MIR_3513:rev      | 2,107        | 1,569      | 3,273        | 5,323      | 9,525        | 5,351      | 4,368        | 2,677      |
| cand465:a             | 2,094        | 1,397      | 2,885        | 1,560      | 979          | 571        |              |            |
| cand324:a             | 2,045        | 1,636      | 1,752        | 3,493      | 1,541        | 1,068      | 216          | 250        |
| cand686               | 2,031        | 1,212      | 7,362        | 8,024      | 12,112       | 4,207      | 9,582        | 11,312     |
| cand467               | 2,013        | 821        | 324          | 1,621      | 990          | 641        | 42           | 53         |
| mmu-mir-200b          | 2,002        | 1,972      | 2,329        | 6,216      | 2,985        | 1,995      | 1,755        | 1,028      |
| mmu-mir-21            | 2,000        | 2,513      | 1,938        | 5,999      | 3,139        | 2,524      | 860          | 1,003      |
| MCE-MIR_3408:fwd      | 1,987        | 1,144      | 164          | 2,276      | 1,186        | 403        | 381          | 439        |



| <b>GCNF-/- Time:</b>  | <b>Day 0</b> |            | <b>Day 1</b> |            | <b>Day 3</b> |            | <b>Day 6</b> |            |
|-----------------------|--------------|------------|--------------|------------|--------------|------------|--------------|------------|
| <b>Array Chip ID:</b> | <b>204</b>   | <b>210</b> | <b>124</b>   | <b>217</b> | <b>356</b>   | <b>357</b> | <b>245</b>   | <b>246</b> |
| MCE-MIR_4627: fwd     | 1,975        | 1,188      | 605          | 3,502      | 6,497        | 2,527      | 250          | 305        |
| MCE-MIR_4999: rev     | 1,955        | 1,136      | 254          | 3,449      | 1,231        | 373        | 1,888        | 2,469      |
| MCE-MIR_3780: rev     | 1,947        | 801        | 6,007        | 2,267      | 9,065        | 5,624      | 6,356        | 4,650      |
| MCE-MIR_6054: rev     | 1,910        | 754        | 1,998        | 2,209      | 2,045        | 1,505      | 5,720        | 2,682      |
| MIR30                 | 1,898        | 1,128      | 1,535        | 2,214      | 2,992        | 1,661      | 171          | 200        |
| MCE-MIR_5443: fwd     | 1,879        | 1,403      | 164          | 6,953      | 2,484        | 1,228      | 600          | 967        |
| MCE-MIR_5384: rev     | 1,876        | 888        | 1,248        | 2,269      | 3,691        | 2,689      | 97           | 66         |
| cand545               | 1,870        | 1,467      | 416          | 5,925      | 4,462        | 1,056      | 714          | 742        |
| MCE-MIR_3523: rev     | 1,870        | 947        | 971          | 4,634      | 3,689        | 754        | 3,583        | 3,565      |
| MCE-MIR_3529: rev     | 1,863        | 1,583      | 4,583        | 4,612      | 29,177       | 15,692     | 5,086        | 2,276      |
| mmu-mir-7             | 1,825        | 1,240      | 809          | 3,987      | 1,517        | 1,101      | 102          | 123        |
| mmu-mir-15b           | 1,817        | 1,529      | 2,075        | 3,689      | 2,411        | 1,744      | 1,428        | 902        |
| cand126               | 1,805        | 1,004      | 1,050        | 775        | 4,798        | 2,959      | 413          | 185        |
| MCE-MIR_4714: rev     | 1,782        | 1,343      | 82           | 2,329      | 2,524        | 1,584      | 74           | 66         |
| MCE-MIR_5068: rev     | 1,753        | 753        | 179          | 5,010      | 1,427        | 371        | 6,450        | 9,622      |
| MCE-MIR_534: fwd      | 1,748        | 809        | 576          | 865        | 8,978        | 3,658      | 63           |            |
| MCE-MIR_1973: fwd     | 1,746        | 1,099      | 365          | 978        | 6,848        | 4,175      | 29           | 60         |
| MCE-MIR_4791: fwd     | 1,734        | 1,226      | 701          | 4,102      | 6,028        | 2,993      | 1,674        | 919        |
| mmu-mir-200c          | 1,692        | 1,459      | 2,205        | 4,022      | 2,667        | 1,669      | 2,261        | 1,215      |
| MCE-MIR_3260: rev     | 1,662        | 550        | 110          | 2,626      | 841          | 418        | 1,626        | 1,445      |
| cand341               | 1,640        | 2,969      | 269          | 2,516      | 255          | 176        | 97           | 131        |
| MCE-MIR_4661: rev     | 1,629        | 1,818      | 272          | 1,231      | 6,727        | 2,792      | 59           | 59         |
| cand268: b            | 1,610        | 1,205      | 1,194        | 2,694      | 797          | 482        | 1,899        | 932        |
| cand268: a            | 1,592        | 606        | 3,768        | 7,708      | 6,640        | 880        | 25,246       | 31,323     |
| MCE-MIR_5470: fwd     | 1,579        | 1,042      | 482          | 1,822      | 2,698        | 1,641      | 114          | 66         |
| MCE-MIR_3685: fwd     | 1,540        | 789        | 1,874        | 3,353      | 10,269       | 6,019      | 1,040        | 380        |
| MCE-MIR_3859: fwd     | 1,495        | 1,074      | 630          | 2,931      | 7,563        | 4,702      | 2,290        | 1,179      |
| cand42: a             | 1,478        | 1,288      | 992          | 5,101      | 5,929        | 2,161      | 1,131        | 634        |
| mmu-mir-23b           | 1,469        | 1,983      | 2,903        | 6,210      | 2,955        | 2,104      | 1,676        | 1,177      |
| MCE-MIR_4320: rev     | 1,460        | 734        | 783          | 1,641      | 5,944        | 3,169      | 33           | 35         |
| MCE-MIR_4740: fwd     | 1,436        | 1,132      | 2,416        | 4,905      | 6,939        | 3,361      | 4,266        | 2,259      |
| cand692: a            | 1,427        | 767        | 208          | 3,378      | 1,319        | 290        | 1,149        | 1,023      |
| cand73                | 1,417        | 904        | 36           | 2,137      | 618          | 362        | 58           | 58         |
| MIR206                | 1,410        | 695        | 2,082        | 4,617      | 3,632        | 614        | 8,590        | 4,203      |
| cand135: b            | 1,395        | 894        | 717          | 2,446      | 1,027        | 681        | 1,205        | 833        |
| MCE-MIR_1857: fwd     | 1,393        | 667        | 740          | 2,599      | 3,355        | 1,051      | 38           | 51         |
| mmu-mir-23a           | 1,371        | 1,803      | 2,575        | 6,712      | 3,056        | 2,461      | 809          | 793        |
| cand445               | 1,302        | 680        | 402          | 1,144      | 1,486        | 875        | 298          | 129        |

| <b>GCNF/- Time:</b>   | <b>Day 0</b> |            | <b>Day 1</b> |            | <b>Day 3</b> |            | <b>Day 6</b> |            |
|-----------------------|--------------|------------|--------------|------------|--------------|------------|--------------|------------|
| <b>Array Chip ID:</b> | <b>204</b>   | <b>210</b> | <b>124</b>   | <b>217</b> | <b>356</b>   | <b>357</b> | <b>245</b>   | <b>246</b> |
| mmu-mir-26a           | 1,273        | 3,298      | 5,041        | 9,231      | 7,266        | 5,200      | 2,818        | 1,853      |
| MCE-MIR_5914:rev      | 1,263        | 578        | 190          | 3,396      | 2,102        | 722        | 354          | 131        |
| mmu-mir-191           | 1,252        | 1,293      | 1,426        | 2,976      | 2,007        | 1,192      | 945          | 851        |
| mmu-mir-103           | 1,225        | 1,763      | 1,002        | 3,851      | 1,679        | 946        | 802          | 1,065      |
| mmu-mir-16            | 1,224        | 2,703      | 742          | 6,337      | 1,734        | 1,038      | 2,533        | 1,523      |
| cand563               | 1,208        | 688        | 286          | 818        | 3,281        | 2,545      | 46           | 58         |
| mmu-mir-24            | 1,197        | 1,855      | 1,372        | 5,887      | 1,874        | 1,155      | 1,641        | 1,279      |
| MCE-MIR_5366:rev      | 1,181        | 474        | 97           | 1,678      | 1,151        | 529        | 1,089        | 1,464      |
| MCE-MIR_1544:rev      | 1,164        | 268        | 488          | 2,581      | 1,016        | 501        | 732          | 849        |
| MCE-MIR_3958:fwd      | 1,144        | 491        | 163          | 2,052      | 868          | 363        | 5,160        | 6,782      |
| MIR166                | 1,132        | 400        | 541          | 1,443      | 1,192        | 494        | 1,515        | 1,130      |
| MCE-MIR_2680:fwd      | 1,122        | 557        | 40           | 1,451      | 1,505        | 1,058      | 42           |            |
| MCE-MIR_3572:rev      | 1,102        | 438        | 146          | 1,774      | 780          | 426        | 1,608        | 2,547      |
| mmu-mir-134           | 1,100        | 702        | 421          | 2,294      | 1,007        | 373        | 687          | 774        |
| cand350               | 1,097        | 598        | 1,540        | 1,772      | 706          | 647        | 103          | 160        |
| MCE-MIR_2679:fwd      | 1,097        | 437        | 41           | 3,910      | 679          | 422        | 3,369        | 4,772      |
| MCE-MIR_3477:rev      | 1,083        | 194        | 962          | 3,406      | 968          | 211        | 1,072        | 720        |
| MCE-MIR_5363:rev      | 1,051        | 640        | 152          | 2,373      | 447          | 304        | 1,403        | 1,219      |
| MCE-MIR_5088:rev      | 1,048        | 1,080      | 46           | 1,718      | 1,258        | 449        | 79           | 119        |
| MCE-MIR_5641:rev      | 1,033        | 1,083      | 513          | 2,469      | 7,519        | 2,180      | 437          | 555        |
| MCE-MIR_1408:fwd      | 1,018        | 779        | 83           | 516        | 3,125        | 2,595      |              |            |
| MCE-MIR_670:fwd       | 1,016        | 581        | 170          | 1,035      | 3,615        | 1,245      | 41           | 37         |
| cand618               | 1,005        | 456        | 264          | 3,426      | 1,716        | 563        | 1,933        | 1,919      |
| cand24                | 988          | 732        | 169          | 1,754      | 1,118        | 216        | 352          | 525        |
| MCE-MIR_2866:rev      | 987          | 427        | 18           | 1,595      | 878          | 697        | 87           | 105        |
| MCE-MIR_5014:fwd      | 983          | 302        |              | 851        | 1,150        | 1,022      | 3,675        | 597        |
| MCE-MIR_5643:fwd      | 970          | 894        | 108          | 822        | 4,642        | 1,090      | 41           | 37         |
| MCE-MIR_4027:rev      | 970          | 683        | 586          | 2,291      | 1,853        | 643        | 2,196        | 2,572      |
| cand557               | 970          | 640        | 716          | 2,071      | 1,945        | 612        | 6,150        | 5,403      |
| mmu-mir-361           | 936          | 659        | 1,092        | 2,350      | 1,617        | 1,074      | 458          | 364        |
| MCE-MIR_5216:rev      | 917          | 378        | 54           | 858        | 1,993        | 1,093      | 95           | 74         |
| cand572:a             | 917          | 556        | 194          | 1,270      | 575          | 269        | 363          | 355        |
| cand532:b             | 916          | 451        | 73           | 1,422      | 1,582        | 1,248      | 97           | 71         |
| MCE-MIR_4674:fwd      | 915          | 599        | 370          | 2,606      | 6,114        | 2,345      | 1,671        | 3,048      |
| MCE-MIR_5363:fwd      | 903          | 501        | 399          | 920        | 632          | 900        | 39           |            |
| MCE-MIR_4610:fwd      | 902          | 773        | 205          | 1,811      | 3,763        | 563        | 40           | 51         |
| mmu-mir-27b           | 899          | 892        | 456          | 2,228      | 724          | 417        | 330          | 492        |
| mmu-mir-494           | 876          | 621        | 336          | 4,518      | 2,453        | 1,240      | 65           | 51         |

| <b>GCNF-/- Time:</b>  | <b>Day 0</b> |            | <b>Day 1</b> |            | <b>Day 3</b> |            | <b>Day 6</b> |            |
|-----------------------|--------------|------------|--------------|------------|--------------|------------|--------------|------------|
| <b>Array Chip ID:</b> | <b>204</b>   | <b>210</b> | <b>124</b>   | <b>217</b> | <b>356</b>   | <b>357</b> | <b>245</b>   | <b>246</b> |
| cand457:a             | 875          | 557        | 306          | 645        | 1,750        | 873        | 118          | 88         |
| MCE-MIR_1364:fwd      | 871          | 290        | 443          | 650        | 1,433        | 839        |              |            |
| mmu-mir-107           | 858          | 1,233      | 665          | 2,958      | 1,413        | 776        | 566          | 676        |
| MCE-MIR_5055:rev      | 853          | 376        | 331          | 2,738      | 1,050        | 315        | 637          | 615        |
| MCE-MIR_3478:rev      | 841          | 199        | 29           | 514        | 314          | 209        | 443          | 336        |
| mmu-mir-30c           | 833          | 1,605      | 1,692        | 4,343      | 1,910        | 1,337      | 1,353        | 882        |
| MCE-MIR_5276:fwd      | 822          | 521        | 373          | 1,664      | 1,878        | 1,005      | 141          | 105        |
| MCE-MIR_5083:rev      | 822          | 416        |              | 1,727      | 2,089        | 747        | 187          | 239        |
| MCE-MIR_5056:rev      | 815          | 343        | 133          | 1,874      | 887          | 294        | 675          | 621        |
| mmu-mir-99b           | 815          | 643        | 724          | 1,868      | 1,747        | 1,079      | 1,974        | 1,518      |
| MCE-MIR_3541:rev      | 800          | 634        | 130          | 2,079      | 1,245        | 374        | 206          | 217        |
| mmu-mir-210           | 789          | 612        | 388          | 1,420      | 392          | 242        | 574          | 293        |
| mmu-mir-18            | 787          | 703        | 147          | 2,361      | 263          | 165        | 89           | 55         |
| MCE-MIR_2986:fwd      | 780          | 351        | 128          | 1,502      | 4,428        | 2,341      | 33           |            |
| MCE-MIR_1074:rev      | 779          | 500        | 163          | 1,142      | 5,403        | 2,457      | 58           | 34         |
| mmu-mir-541           | 777          | 633        | 376          | 1,300      | 520          | 292        | 279          | 113        |
| mmu-mir-298           | 771          | 544        | 366          | 1,340      | 1,605        | 1,003      | 129          | 76         |
| mmu-mir-127           | 763          | 747        | 290          | 1,332      | 490          | 295        | 325          | 261        |
| mmu-mir-429           | 757          | 522        | 190          | 2,188      | 506          | 345        | 271          | 361        |
| MIR74                 | 754          | 420        | 130          | 2,992      | 652          | 381        | 250          | 482        |
| MCE-MIR_6107:fwd      | 746          | 479        | 313          | 1,052      | 1,353        | 571        | 83           | 53         |
| cand690               | 734          | 533        | 3,359        | 932        | 16,801       | 7,054      | 401          | 445        |
| cand149:b             | 734          | 295        | 156          | 882        | 1,875        | 1,441      | 41           |            |
| cand144:a             | 732          | 617        | 297          | 1,447      | 629          | 444        | 183          | 130        |
| cand103:b             | 712          | 902        | 1,210        | 2,310      | 1,370        | 765        | 295          | 429        |
| MCE-MIR_6026:rev      | 712          | 418        | 62           | 929        | 2,058        | 343        |              |            |
| MCE-MIR_6050:rev      | 702          | 339        |              | 1,276      | 963          | 545        | 111          | 144        |
| cand412               | 695          | 396        | 252          | 449        | 3,833        | 2,738      | 239          | 166        |
| MCE-MIR_5411:rev      | 691          | 371        |              | 214        | 7,010        | 4,003      |              |            |
| MCE-MIR_5369:rev      | 685          | 386        | 72           | 975        | 543          | 293        | 128          | 95         |
| cand342:b             | 673          | 275        | 532          | 1,080      | 1,881        | 1,464      | 111          | 92         |
| MCE-MIR_2902:rev      | 670          | 390        | 214          | 1,193      | 5,165        | 1,380      | 126          | 100        |
| cand462               | 668          | 292        | 248          | 667        | 5,319        | 4,579      | 116          | 90         |
| mmu-mir-26b           | 667          | 595        | 559          | 2,328      | 1,348        | 922        | 263          | 677        |
| mmu-mir-379           | 663          | 408        | 219          | 1,013      | 245          | 189        | 128          | 114        |
| MCE-MIR_4755:fwd      | 659          | 396        | 137          | 812        | 1,386        | 656        | 54           | 39         |
| cand371:b             | 638          | 257        | 207          | 1,323      | 984          | 308        | 307          | 332        |
| cand315:b             | 618          | 492        | 682          | 1,352      | 755          | 423        | 395          | 302        |

| GCNF-/- Time:    | Day 0          |     | Day 1 |       | Day 3 |       | Day 6 |       |
|------------------|----------------|-----|-------|-------|-------|-------|-------|-------|
|                  | Array Chip ID: | 204 | 210   | 124   | 217   | 356   | 357   | 245   |
| mmu-mir-125a     | 616            | 770 | 846   | 2,255 | 2,186 | 1,475 | 1,926 | 1,462 |
| MCE-MIR_2968:fwd | 614            | 201 | 135   | 429   | 488   | 191   | 68    | 35    |
| mmu-mir-34a      | 606            | 512 | 360   | 1,779 | 725   | 527   | 505   | 247   |
| S-mmu-mir-140    | 602            | 535 | 493   | 1,076 | 397   | 322   | 894   | 580   |
| mmu-mir-205      | 591            | 312 | 225   | 985   | 342   | 214   | 372   | 165   |
| MCE-MIR_638:fwd  | 586            | 294 | 57    | 725   | 238   | 190   | 37    | 56    |
| cand459          | 568            | 257 | 48    | 1,631 | 1,447 | 141   | 754   | 758   |
| MCE-MIR_543:fwd  | 564            | 271 | 98    | 628   | 1,695 | 684   | 244   | 312   |
| MCE-MIR_406:rev  | 561            | 319 |       | 320   | 1,118 | 568   |       |       |
| cand104:a        | 548            | 557 | 502   | 1,301 | 478   | 356   | 374   | 439   |
| MCE-MIR_3557:rev | 538            | 440 | 218   | 2,262 | 1,946 | 333   | 1,261 | 1,020 |
| MCE-MIR_2345:fwd | 538            | 181 |       | 776   | 4,998 | 3,004 |       |       |
| mmu-mir-363      | 537            | 297 | 243   | 1,637 | 476   | 298   |       |       |
| cand595:a        | 535            | 199 | 87    | 1,156 | 1,014 | 558   | 57    | 30    |
| cand564:b        | 531            | 438 | 198   | 788   | 337   | 192   | 195   | 157   |
| MCE-MIR_5511:rev | 515            | 413 | 61    | 214   | 2,153 | 1,321 |       |       |
| MCE-MIR_4198:fwd | 513            | 206 | 43    | 753   | 1,024 | 436   | 51    |       |
| MCE-MIR_3624:rev | 497            | 257 | 191   | 1,008 | 511   | 188   | 676   | 744   |
| MCE-MIR_5055:fwd | 496            | 254 | 22    | 629   | 432   | 239   | 52    | 42    |
| MIR253           | 488            | 321 | 40    | 1,172 | 160   | 101   | 40    | 72    |
| MCE-MIR_2470:fwd | 486            | 286 | 189   | 753   | 792   | 215   | 136   | 129   |
| MCE-MIR_3518:rev | 482            | 246 | 22    | 977   | 965   | 178   | 436   | 391   |
| MCE-MIR_3628:rev | 477            | 237 | 940   | 1,122 | 4,712 | 904   | 2,480 | 1,352 |
| MCE-MIR_3653:rev | 466            | 254 |       | 518   | 1,816 | 902   | 99    |       |
| cand284:a        | 459            | 845 | 615   | 2,617 | 653   | 429   | 494   | 679   |
| MCE-MIR_4010:rev | 455            | 344 | 73    | 641   | 1,198 | 292   | 64    | 91    |
| MCE-MIR_1611:fwd | 453            | 200 | 184   | 695   | 1,774 | 372   | 145   | 86    |
| cand152:b        | 447            | 305 | 568   | 812   | 1,172 | 786   | 345   | 149   |
| MCE-MIR_5745:fwd | 443            | 219 | 599   | 326   | 1,080 | 1,177 | 44    | 37    |
| MIR257           | 438            | 166 | 379   | 857   | 845   | 575   | 27    | 83    |
| cand317          | 426            | 284 | 280   | 663   | 492   | 356   | 363   | 294   |
| MCE-MIR_4030:rev | 414            | 145 | 67    | 592   | 2,598 | 1,495 | 21    | 42    |
| MCE-MIR_2361:fwd | 392            | 182 |       | 200   | 2,707 | 1,963 |       |       |
| MCE-MIR_5503:rev | 390            | 231 | 15    | 492   | 3,851 | 2,143 |       | 36    |
| cand314          | 380            | 557 | 500   | 1,650 | 777   | 472   | 476   | 581   |
| mmu-mir-185      | 379            | 323 | 267   | 875   | 686   | 391   | 90    | 164   |
| MCE-MIR_2815:fwd | 374            | 170 | 46    | 574   | 669   | 309   | 45    | 45    |
| cand276:a        | 370            | 320 | 264   | 936   | 397   | 284   | 248   | 154   |

| <b>GCNF-/- Time:</b>  | <b>Day 0</b> |            | <b>Day 1</b> |            | <b>Day 3</b> |            | <b>Day 6</b> |            |
|-----------------------|--------------|------------|--------------|------------|--------------|------------|--------------|------------|
| <b>Array Chip ID:</b> | <b>204</b>   | <b>210</b> | <b>124</b>   | <b>217</b> | <b>356</b>   | <b>357</b> | <b>245</b>   | <b>246</b> |
| mmu-mir-155           | 365          | 100        | 693          | 1,204      | 426          | 186        | 233          | 431        |
| mmu-mir-27a           | 364          | 432        | 115          | 1,638      | 311          | 192        | 89           | 280        |
| MCE-MIR_2889:fwd      | 363          | 217        | 211          | 425        | 581          | 245        | 82           | 77         |
| MCE-MIR_1066:rev      | 348          | 230        | 93           | 418        | 1,272        | 327        | 42           | 46         |
| mmu-mir-342           | 348          | 242        | 289          | 630        | 1,251        | 529        | 236          | 243        |
| cand137:a             | 346          | 524        | 244          | 1,820      | 247          | 175        | 252          | 510        |
| mmu-mir-302c          | 341          | 113        | 24           | 240        | 113          | 52         |              |            |
| mmu-mir-148a          | 328          | 289        | 116          | 1,631      | 204          | 162        | 99           | 283        |
| mmu-mir-291b-3p       | 327          | 119        |              | 1,550      | 162          | 351        |              |            |
| MCE-MIR_1974:fwd      | 323          | 111        | 33           | 53         | 2,445        | 1,915      |              |            |
| cand42:b              | 323          | 268        | 106          | 657        | 403          | 230        | 589          | 392        |
| cand570               | 320          | 97         |              | 252        | 1,214        | 1,213      |              |            |
| mmu-mir-30b           | 319          | 439        | 590          | 2,179      | 890          | 650        | 469          | 664        |
| MCE-MIR_936:rev       | 311          | 129        | 49           | 316        | 324          | 155        | 84           | 90         |
| mmu-mir-376b          | 310          | 191        | 47           | 564        | 97           | 53         | 56           | 104        |
| cand65                | 310          | 116        | 28           | 950        | 356          | 74         | 475          | 525        |
| MCE-MIR_2983:rev      | 304          | 192        | 131          | 320        | 554          | 327        | 94           | 141        |
| MCE-MIR_3439:rev      | 303          | 142        |              | 494        | 649          | 305        |              | 35         |
| cand532:a             | 303          | 270        | 35           | 2,404      | 473          | 97         | 548          | 430        |
| mmu-mir-382           | 300          | 184        | 105          | 557        | 274          | 191        | 119          | 80         |
| cand347               | 300          | 113        | 41           | 735        | 408          | 122        | 288          | 206        |
| mmu-mir-181b          | 299          | 221        | 70           | 1,958      | 795          | 508        | 382          | 846        |
| MCE-MIR_2078:fwd      | 291          | 194        | 387          | 751        | 487          | 233        | 848          | 391        |
| MCE-MIR_3474:rev      | 288          | 56         | 63           | 694        | 295          | 194        |              |            |
| MCE-MIR_1569:rev      | 286          | 114        | 93           | 403        | 1,142        | 269        | 100          | 86         |
| cand315:a             | 279          | 186        | 180          | 468        | 382          | 231        | 105          | 98         |
| MCE-MIR_4345:rev      | 278          | 83         |              | 135        | 618          | 294        |              |            |
| MCE-MIR_3613:rev      | 272          | 91         | 26           | 366        | 238          | 90         |              | 94         |
| mmu-mir-409           | 272          | 232        | 134          | 508        | 773          | 337        | 72           | 49         |
| MCE-MIR_3492:fwd      | 266          | 157        | 48           | 806        | 2,838        | 719        | 79           | 71         |
| mmu-mir-151           | 264          | 189        | 186          | 588        | 346          | 216        | 114          | 41         |
| MCE-MIR_3886:fwd      | 263          | 167        | 89           | 425        | 152          | 79         | 81           | 97         |
| mmu-mir-346           | 262          | 159        | 159          | 747        | 558          | 323        | 358          | 440        |
| mmu-mir-324-5p        | 257          | 193        | 165          | 702        | 353          | 222        | 282          | 176        |
| cand109:b             | 252          | 136        | 88           | 401        | 407          | 198        | 135          | 165        |
| cand624               | 250          | 116        |              | 344        | 72           | 91         | 99           | 180        |
| MCE-MIR_4922:rev      | 247          | 168        | 30           | 390        | 1,030        | 580        |              |            |
| MCE-MIR_329:fwd       | 247          | 84         | 124          | 397        | 343          | 233        | 35           |            |

| <b>GCNF-/- Time:</b>  | <b>Day 0</b> |            | <b>Day 1</b> |            | <b>Day 3</b> |            | <b>Day 6</b> |            |
|-----------------------|--------------|------------|--------------|------------|--------------|------------|--------------|------------|
| <b>Array Chip ID:</b> | <b>204</b>   | <b>210</b> | <b>124</b>   | <b>217</b> | <b>356</b>   | <b>357</b> | <b>245</b>   | <b>246</b> |
| mmu-mir-297           | 244          | 83         | 15           | 625        | 236          | 126        |              |            |
| cand244               | 244          | 135        | 52           | 145        | 471          | 305        | 33           |            |
| MCE-MIR_5473:fwd      | 239          | 168        | 71           | 272        | 2,424        | 693        | 43           |            |
| MCE-MIR_2285:fwd      | 235          | 93         | 36           | 270        | 1,230        | 760        | 26           | 72         |
| MCE-MIR_5872:fwd      | 235          | 123        | 60           | 355        | 420          | 279        | 76           |            |
| MCE-MIR_3847:rev      | 230          | 148        | 76           | 412        | 161          | 101        | 95           | 83         |
| mmu-mir-195           | 227          | 292        | 73           | 1,494      | 264          | 137        | 90           | 353        |
| mmu-mir-324-3p        | 227          | 169        | 127          | 527        | 305          | 180        | 151          | 118        |
| MCE-MIR_4726:fwd      | 224          | 299        | 106          | 695        | 16,257       | 5,809      | 93           | 152        |
| MCE-MIR_5596:rev      | 218          | 124        | 68           | 201        | 456          | 190        | 38           |            |
| MCE-MIR_1793:fwd      | 217          | 126        | 23           | 192        | 405          | 340        | 30           | 32         |
| cand497:a             | 208          | 214        | 103          | 676        | 438          | 150        | 279          | 869        |
| mmu-mir-422b          | 205          | 264        | 64           | 409        | 139          | 81         | 68           | 182        |
| MCE-MIR_2196:fwd      | 205          | 65         | 17           | 155        | 404          | 185        | 66           | 103        |
| MCE-MIR_5790:fwd      | 204          | 93         |              | 512        | 707          | 336        | 78           |            |
| MCE-MIR_1046:rev      | 204          | 99         | 43           | 276        | 529          | 261        | 51           | 51         |
| mmu-mir-17-3p         | 203          | 146        | 97           | 453        | 137          | 110        | 47           |            |
| MCE-MIR_3791:rev      | 198          | 170        |              | 741        | 834          | 260        | 63           | 53         |
| MCE-MIR_4153:fwd      | 196          | 77         | 33           | 430        | 218          | 143        | 63           | 32         |
| MCE-MIR_469:fwd       | 193          | 112        | 73           | 224        | 535          | 282        | 63           | 57         |
| MCE-MIR_5004:rev      | 192          | 134        | 29           | 778        | 331          | 114        | 188          | 177        |
| mmu-mir-152           | 191          | 152        | 77           | 822        | 128          | 79         | 163          | 200        |
| MCE-MIR_18:fwd        | 188          | 69         | 21           | 128        | 272          | 118        |              |            |
| mmu-mir-101b          | 185          | 205        | 16           | 545        | 89           | 53         | 23           | 129        |
| MCE-MIR_1756:rev      | 181          | 107        | 58           | 178        | 354          | 273        | 37           | 66         |
| MCE-MIR_4031:fwd      | 181          | 105        | 69           | 196        | 481          | 236        | 44           | 96         |
| MCE-MIR_1508:fwd      | 181          | 103        |              | 758        | 225          | 105        | 67           | 54         |
| MCE-MIR_2563:fwd      | 179          | 247        | 400          | 1,431      | 5,729        | 1,740      | 1,116        | 1,010      |
| cand5                 | 177          | 79         | 25           | 927        | 146          | 50         | 474          | 564        |
| mmu-mir-335           | 176          | 120        |              | 1,090      | 395          | 370        | 89           | 115        |
| MCE-MIR_1283:fwd      | 175          | 98         | 26           | 402        | 235          | 164        | 109          | 194        |
| MCE-MIR_2092:fwd      | 175          | 88         | 25           | 231        | 536          | 118        |              |            |
| cand334:b             | 173          | 138        | 27           | 200        | 145          | 69         | 74           | 92         |
| MCE-MIR_5197:rev      | 171          | 67         | 54           | 338        | 124          | 88         | 77           |            |
| MCE-MIR_1788:rev      | 171          | 65         | 42           | 146        | 1,537        | 2,050      |              |            |
| cand340               | 170          | 70         | 19           | 197        | 225          | 98         | 106          | 86         |
| MCE-MIR_1458:rev      | 168          | 47         | 33           | 453        | 122          | 136        | 69           | 73         |
| MCE-MIR_3663:fwd      | 168          | 97         | 76           | 314        | 417          | 217        | 167          | 214        |

| GCNF/-/ Time:    | Day 0          |     | Day 1 |     | Day 3 |       | Day 6 |     |
|------------------|----------------|-----|-------|-----|-------|-------|-------|-----|
|                  | Array Chip ID: | 204 | 210   | 124 | 217   | 356   | 357   | 245 |
| mmu-mir-28       | 167            | 114 | 67    | 365 | 321   | 189   | 60    | 56  |
| cand192          | 163            | 69  | 13    | 467 | 642   | 123   | 106   | 77  |
| mmu-mir-31       | 163            | 140 | 137   | 458 | 171   | 121   | 245   | 184 |
| cand541          | 161            | 118 | 58    | 737 | 1,213 | 146   | 309   | 229 |
| mmu-mir-30d      | 158            | 249 | 151   | 977 | 513   | 295   | 104   | 311 |
| MCE-MIR_2680:rev | 155            | 117 |       | 890 | 657   | 418   | 58    | 54  |
| cand501          | 153            | 100 | 24    | 324 | 176   | 71    | 238   | 296 |
| cand57           | 151            | 116 |       | 210 | 993   | 256   |       |     |
| MCE-MIR_5339:rev | 150            | 71  | 36    | 298 | 93    | 70    | 48    | 58  |
| MCE-MIR_4716:fwd | 149            | 58  | 41    | 310 | 346   | 198   | 36    |     |
| MCE-MIR_4791:rev | 148            | 95  | 96    | 454 | 291   | 222   | 33    |     |
| cand26           | 143            | 69  | 28    | 220 | 228   | 113   | 114   | 263 |
| cand386:a        | 143            | 95  |       | 141 | 364   | 265   | 88    | 139 |
| MCE-MIR_5473:rev | 139            | 115 | 28    | 324 | 385   | 193   | 96    | 183 |
| MCE-MIR_1342:fwd | 139            | 199 | 25    | 335 | 444   | 50    |       | 60  |
| cand200          | 139            | 38  |       | 431 | 9,470 | 5,914 | 16    |     |
| mmu-mir-433-3p   | 138            | 104 | 116   | 259 | 233   | 128   | 87    | 40  |
| cand304          | 138            | 117 | 30    | 300 | 113   | 88    | 62    | 465 |
| mmu-mir-484      | 136            | 109 | 76    | 422 | 506   | 285   | 23    | 63  |
| mmu-mir-214      | 135            | 66  | 66    | 371 | 959   | 540   | 1,208 | 927 |
| MCE-MIR_3471:rev | 132            | 30  |       | 335 | 169   | 72    | 248   | 160 |
| MCE-MIR_1015:rev | 131            | 64  | 66    | 265 | 483   | 122   | 166   |     |
| MCE-MIR_5418:fwd | 131            | 73  | 105   | 211 | 4,545 | 3,251 | 35    | 42  |
| MCE-MIR_3101:rev | 131            | 55  | 18    | 136 | 467   | 232   |       | 32  |
| MCE-MIR_725:fwd  | 130            | 98  |       | 389 | 149   | 109   | 196   | 313 |
| MIR85            | 129            | 335 | 92    | 913 | 144   | 103   | 42    | 394 |
| mmu-mir-370      | 128            | 58  | 37    | 206 | 183   | 102   | 68    |     |
| MCE-MIR_4513:fwd | 125            | 67  | 26    | 429 | 757   | 215   | 107   | 103 |
| cand297:b        | 125            | 155 | 41    | 572 | 104   | 53    | 68    | 545 |
| MCE-MIR_6084:rev | 124            | 87  |       | 187 | 44    | 42    | 29    |     |
| MCE-MIR_3441:fwd | 124            | 68  | 20    | 236 | 781   | 309   |       |     |
| MCE-MIR_3407:rev | 122            | 31  | 44    | 125 | 288   | 69    |       |     |
| mmu-mir-434-3p   | 122            | 98  | 34    | 244 | 100   | 62    | 96    | 139 |
| cand334:a        | 119            | 107 |       | 500 | 529   | 83    | 63    | 55  |
| MCE-MIR_2349:rev | 119            | 86  | 43    | 207 | 1,048 | 283   |       | 66  |
| S-mmu-let-7d     | 119            | 103 | 55    | 220 | 204   | 139   | 31    | 47  |
| cand275          | 119            | 74  |       | 223 | 565   | 182   | 32    | 45  |
| MCE-MIR_6055:rev | 119            | 68  | 23    | 200 | 650   | 193   | 40    |     |

| GCNF/-/ Time:    | Day 0          |     | Day 1 |     | Day 3 |       | Day 6 |       |
|------------------|----------------|-----|-------|-----|-------|-------|-------|-------|
|                  | Array Chip ID: | 204 | 210   | 124 | 217   | 356   | 357   | 245   |
| MCE-MIR_993:rev  | 118            | 20  |       | 53  | 43    | 30    | 202   | 81    |
| mmu-mir-129-5p   | 115            | 77  | 30    | 169 | 353   | 210   | 32    | 54    |
| mmu-mir-15a      | 115            | 93  |       | 327 | 79    | 48    |       | 259   |
| mmu-mir-19a      | 113            | 280 |       | 433 | 34    | 15    |       | 53    |
| cand97           | 113            | 88  |       | 163 | 51    | 35    |       | 59    |
| mmu-mir-296      | 111            | 106 |       | 222 | 325   | 231   |       | 50    |
| MCE-MIR_2524:fwd | 110            | 69  | 105   | 389 | 521   | 125   | 420   | 563   |
| MCE-MIR_5389:rev | 109            | 66  | 20    | 162 | 141   | 80    | 75    | 73    |
| MCE-MIR_2566:fwd | 109            | 42  |       | 214 | 155   | 127   |       |       |
| mmu-mir-30a-5p   | 108            | 161 | 45    | 857 | 159   | 97    | 35    | 378   |
| S-mmu-mir-302c   | 105            | 66  | 43    | 137 | 40    | 34    |       |       |
| MCE-MIR_1746:rev | 102            | 54  |       | 526 | 977   | 499   |       |       |
| cand386:b        | 102            | 62  | 37    |     | 197   | 182   |       | 51    |
| MCE-MIR_988:fwd  | 101            | 84  |       | 230 | 92    | 86    | 115   | 191   |
| cand616:b        | 100            | 43  | 27    | 155 | 245   | 74    | 40    | 51    |
| cand374:a        | 99             | 166 | 138   | 309 | 771   | 677   | 1,365 | 1,009 |
| cand678          | 99             | 83  | 24    | 493 | 138   | 24    | 54    | 35    |
| MCE-MIR_3444:rev | 98             | 74  | 23    | 120 | 92    | 46    |       |       |
| MCE-MIR_2661:rev | 98             | 31  |       | 94  | 150   | 86    | 40    |       |
| MCE-MIR_5193:rev | 97             | 36  | 16    | 180 | 110   | 72    | 43    |       |
| MCE-MIR_5454:rev | 96             | 71  |       | 239 | 198   | 135   | 82    | 147   |
| mmu-mir-546      | 94             | 43  |       | 153 | 329   | 137   |       |       |
| MCE-MIR_4714:fwd | 92             | 54  |       | 148 | 125   | 77    | 54    | 63    |
| MCE-MIR_557:fwd  | 91             | 69  |       | 241 | 309   | 120   | 84    | 137   |
| cand78:a         | 91             | 38  |       | 135 |       |       |       |       |
| MCE-MIR_5328:rev | 91             | 59  | 18    | 341 | 4,430 | 2,582 |       |       |
| MCE-MIR_5210:fwd | 89             | 38  |       | 91  | 83    | 59    | 50    | 38    |
| mmu-mir-188      | 89             | 39  | 19    | 219 | 117   | 81    | 80    | 113   |
| MCE-MIR_1773:rev | 89             | 70  | 23    | 128 | 266   | 93    | 42    | 85    |
| mmu-mir-29a      | 89             | 129 | 31    | 447 | 36    |       |       | 470   |
| MIR124           | 89             | 84  | 30    | 394 | 107   | 66    | 68    | 73    |
| MCE-MIR_3261:fwd | 88             | 42  |       | 161 | 114   | 68    | 70    | 74    |
| cand115:b        | 88             | 64  |       | 183 | 3,429 | 1,570 | 20    |       |
| MCE-MIR_4748:rev | 88             | 66  | 28    | 112 | 140   | 70    | 62    | 127   |
| MCE-MIR_1478:fwd | 88             | 30  | 55    | 175 | 125   | 64    | 126   | 85    |
| mmu-mir-145      | 86             | 170 | 89    | 328 | 229   | 115   | 91    | 313   |
| mmu-mir-124a     | 86             | 208 | 37    | 497 | 104   | 83    | 27    | 273   |
| MCE-MIR_5295:rev | 85             | 80  |       | 241 | 196   | 120   | 83    | 118   |



| GCNF-/- Time:    | Day 0 |     | Day 1 |     | Day 3 |     | Day 6 |       |
|------------------|-------|-----|-------|-----|-------|-----|-------|-------|
|                  | 204   | 210 | 124   | 217 | 356   | 357 | 245   | 246   |
| MCE-MIR_1283:rev | 84    | 50  |       | 61  | 821   | 437 |       |       |
| cand118          | 84    | 94  | 385   | 317 | 980   | 927 | 845   | 1,032 |
| cand457:b        | 83    | 58  | 88    | 101 | 1,324 | 632 | 59    | 87    |
| mmu-mir-149      | 82    | 84  | 55    | 305 | 124   | 99  |       | 72    |
| MCE-MIR_4763:fwd | 81    | 66  |       | 151 | 144   | 135 | 54    | 127   |
| MCE-MIR_5100:rev | 81    | 39  | 13    | 187 | 411   | 155 | 89    | 89    |
| mmu-let-7c       | 80    | 99  | 481   | 409 | 880   | 983 | 845   | 1,132 |
| MCE-MIR_777:rev  | 80    | 68  |       | 58  | 2,736 | 500 |       |       |
| MCE-MIR_5488:rev | 80    | 83  | 16    | 147 | 217   | 121 | 58    | 66    |
| MCE-MIR_5322:fwd | 79    | 71  |       | 232 | 164   | 116 | 66    | 135   |
| MCE-MIR_4752:rev | 79    | 62  |       | 217 | 92    | 99  | 80    | 163   |
| MIR202           | 79    | 67  | 31    | 216 | 107   | 57  |       | 55    |
| MCE-MIR_734:fwd  | 78    | 57  | 26    | 122 | 130   | 85  | 42    | 45    |
| mmu-mir-186      | 78    | 36  |       | 156 | 29    | 22  |       |       |
| MCE-MIR_942:rev  | 77    | 56  | 17    | 143 | 813   | 154 | 44    | 76    |
| MCE-MIR_293:fwd  | 77    | 31  |       | 133 | 216   | 111 | 87    | 69    |
| cand1:b          | 77    | 87  | 30    | 247 | 151   | 89  | 65    | 250   |
| MCE-MIR_5406:rev | 76    | 48  | 22    | 82  | 48    | 31  | 32    | 78    |
| mmu-mir-351      | 73    | 42  | 30    | 177 | 197   | 147 | 348   | 181   |
| MCE-MIR_4712:fwd | 73    | 56  |       | 171 | 96    | 97  | 64    | 103   |
| cand286          | 73    | 56  |       | 531 | 205   | 38  | 144   | 155   |
| MCE-MIR_3226:fwd | 73    | 30  |       | 89  | 202   | 196 | 34    |       |
| mmu-mir-425      | 73    | 70  |       | 187 | 104   | 45  | 37    | 58    |
| cand278:a        | 73    | 38  | 41    | 223 | 110   | 85  | 101   | 161   |
| MCE-MIR_5736:rev | 73    | 55  | 43    | 69  | 349   | 205 | 57    | 70    |
| MCE-MIR_5152:fwd | 72    | 50  | 18    | 70  | 334   | 169 | 33    | 65    |
| MCE-MIR_1931:fwd | 70    | 28  |       | 99  | 326   | 188 | 109   | 108   |
| cand284:b        | 70    | 31  | 49    | 256 | 183   | 140 | 97    | 97    |
| MCE-MIR_3820:fwd | 70    | 48  |       | 203 | 116   | 47  | 51    | 156   |
| cand153:a        | 69    | 58  |       | 188 | 177   | 96  | 33    | 74    |
| mmu-mir-329      | 69    | 70  | 30    | 265 | 180   | 113 | 52    | 50    |
| MIR75            | 69    | 36  | 28    | 268 | 450   | 310 | 729   | 608   |
| mmu-mir-200a     | 68    | 53  | 18    | 436 | 60    | 41  |       | 183   |
| cand309          | 68    | 26  |       | 140 | 83    | 24  | 442   | 260   |
| cand161          | 67    | 82  | 331   | 236 | 724   | 648 | 732   | 902   |
| mmu-mir-150      | 67    | 75  | 40    | 139 |       | 35  |       | 65    |
| MCE-MIR_399:fwd  | 67    | 29  | 15    | 97  | 94    | 47  |       |       |
| mmu-mir-223      | 67    | 53  |       | 250 | 137   | 122 | 58    | 128   |

| GCNF-/- Time:     | Day 0          |     | Day 1 |     | Day 3 |     | Day 6 |     |
|-------------------|----------------|-----|-------|-----|-------|-----|-------|-----|
|                   | Array Chip ID: | 204 | 210   | 124 | 217   | 356 | 357   | 245 |
| MCE-MIR_4202:rev  | 66             | 34  |       | 98  | 222   | 157 | 26    |     |
| cand346           | 65             | 37  |       | 108 | 2,007 | 230 | 32    | 44  |
| MCE-MIR_1576:rev  | 65             | 35  | 17    | 115 | 164   | 115 | 28    | 36  |
| mmu-mir-126-3p    | 65             | 214 | 17    | 601 | 79    | 48  | 31    | 506 |
| mmu-mir-328       | 64             | 34  | 25    | 136 | 413   | 179 | 43    | 41  |
| MCE-MIR_4756:rev  | 64             | 45  |       | 77  | 73    | 88  | 47    | 105 |
| MCE-MIR_3667: fwd | 64             | 28  | 20    | 56  | 159   | 125 |       |     |
| mmu-let-7a        | 64             | 65  | 305   | 251 | 649   | 782 | 403   | 811 |
| MCE-MIR_5135: fwd | 64             | 47  | 32    | 69  | 259   | 127 | 53    |     |
| mmu-let-7e        | 63             | 59  | 212   | 170 | 464   | 475 | 309   | 571 |
| MCE-MIR_2111: fwd | 63             | 46  | 24    | 99  | 569   | 287 |       |     |
| cand465:b         | 62             | 33  |       | 52  |       |     |       |     |
| MCE-MIR_959:rev   | 62             | 60  |       | 79  | 53    | 49  |       |     |
| cand337           | 62             | 54  | 54    | 199 | 59    | 34  | 45    | 137 |
| MCE-MIR_5597: fwd | 60             | 49  |       | 79  | 80    | 70  | 27    | 65  |
| MCE-MIR_3624: fwd | 60             | 49  | 21    | 58  | 53    | 42  |       | 109 |
| MCE-MIR_3797: fwd | 59             | 26  | 18    | 113 | 413   | 261 | 108   | 67  |
| cand718:a         | 59             | 29  |       | 64  | 57    | 52  |       |     |
| MCE-MIR_2304:rev  | 59             | 40  |       | 56  |       | 27  |       | 62  |
| mmu-mir-431       | 59             | 47  | 24    | 196 | 108   | 62  | 69    |     |
| cand490           | 59             | 67  | 215   | 157 | 469   | 405 | 261   | 629 |
| MCE-MIR_2134: fwd | 58             | 36  |       | 118 | 308   | 102 |       |     |
| cand302:b         | 58             | 35  |       | 299 | 86    | 30  | 74    | 95  |
| MCE-MIR_1742:rev  | 57             | 25  |       | 122 | 956   | 56  |       |     |
| cand90:a          | 57             | 23  | 72    | 245 | 143   | 76  | 146   | 394 |
| MCE-MIR_3684:rev  | 57             | 26  |       | 102 | 173   | 84  | 87    |     |
| MCE-MIR_1495: fwd | 56             | 36  |       | 71  | 108   | 64  |       | 42  |
| cand336           | 55             | 43  | 22    | 184 | 66    | 40  | 58    | 147 |
| MCE-MIR_2464: fwd | 55             | 30  |       | 89  | 107   | 56  |       |     |
| cand709           | 54             | 51  | 195   | 103 | 433   | 381 | 240   | 701 |
| mmu-mir-345       | 54             | 50  | 14    | 141 | 111   | 83  |       | 37  |
| MCE-MIR_2617: fwd | 54             | 33  |       | 97  | 138   | 81  | 19    |     |
| mmu-mir-543       | 54             | 66  | 23    | 208 | 95    | 54  |       |     |
| MCE-MIR_364: fwd  | 53             | 21  |       | 81  | 111   | 79  | 70    | 85  |
| mmu-mir-207       | 53             | 36  | 11    | 142 | 585   | 250 | 21    | 60  |
| mmu-mir-224       | 52             | 20  | 36    | 68  | 60    | 71  | 24    |     |
| cand224           | 52             | 15  |       | 63  | 60    |     | 20    |     |
| MCE-MIR_780:rev   | 51             | 37  |       | 64  | 497   | 228 |       |     |

| GCNF-/- Time:     | Day 0          |     | Day 1 |     | Day 3 |     | Day 6 |     |
|-------------------|----------------|-----|-------|-----|-------|-----|-------|-----|
|                   | Array Chip ID: | 204 | 210   | 124 | 217   | 356 | 357   | 245 |
| mmu-mir-540       | 51             | 41  | 16    | 74  | 51    | 25  |       |     |
| MCE-MIR_5300: fwd | 51             | 52  |       | 118 | 104   | 66  | 52    | 48  |
| MCE-MIR_162: fwd  | 50             | 19  |       | 83  | 77    | 46  |       |     |
| cand104: b        | 50             | 32  | 25    | 60  | 26    | 28  |       |     |
| MCE-MIR_4087: rev | 50             | 29  |       | 63  | 151   | 118 | 28    |     |
| MIR102            | 50             | 36  |       | 95  | 219   | 132 | 45    | 59  |
| MCE-MIR_5143: rev | 49             | 34  |       | 57  |       | 26  |       |     |
| mmu-mir-187       | 48             | 30  | 17    | 110 | 90    | 56  |       | 47  |
| mmu-mir-330       | 48             | 34  | 40    | 92  | 88    | 56  |       |     |
| cand106: a        | 48             | 40  | 94    | 60  | 398   | 357 | 216   | 617 |
| cand667: b        | 48             | 29  | 16    | 178 | 179   | 62  | 45    |     |
| cand119           | 48             | 39  | 148   | 71  | 358   | 340 | 255   | 635 |
| mmu-let-7b        | 48             | 35  | 187   | 100 | 333   | 378 | 239   | 670 |
| MCE-MIR_3646: rev | 47             | 18  | 31    | 114 | 80    | 43  | 40    |     |
| mmu-mir-181a      | 47             | 83  | 43    | 239 | 261   | 148 | 511   | 745 |
| mmu-let-7d        | 47             | 40  | 114   | 79  | 322   | 365 | 170   | 582 |
| cand13            | 47             | 48  |       | 94  | 136   | 54  |       |     |
| MCE-MIR_4675: fwd | 46             | 28  |       | 81  | 143   | 87  |       |     |
| cand172: a        | 46             | 32  |       | 51  |       | 33  |       |     |
| MCE-MIR_1670: fwd | 45             | 16  |       | 64  | 298   | 113 | 23    |     |
| MCE-MIR_4493: fwd | 45             | 23  | 14    | 43  | 59    | 38  |       |     |
| mmu-mir-412       | 45             | 40  | 16    | 69  | 59    | 37  | 20    | 40  |
| cand146           | 45             | 32  | 29    | 227 | 147   | 47  | 561   | 494 |
| cand103: a        | 44             | 27  | 39    | 54  |       | 41  |       |     |
| MCE-MIR_2192: rev | 44             | 18  |       |     | 94    | 44  |       |     |
| MCE-MIR_3793: rev | 44             | 16  |       | 86  | 59    | 57  | 64    | 33  |
| MCE-MIR_5340: fwd | 43             | 35  |       | 85  | 1,672 | 363 |       |     |
| MCE-MIR_4179: rev | 43             | 14  | 29    | 104 | 91    | 92  | 439   | 222 |
| mmu-mir-211       | 43             | 33  |       | 65  | 29    | 26  |       |     |
| mmu-mir-101a      | 42             | 39  |       | 107 | 25    |     |       | 95  |
| mmu-mir-143       | 42             | 128 | 18    | 351 | 43    | 26  | 29    | 313 |
| MCE-MIR_3059: rev | 42             | 21  |       | 52  |       |     |       | 44  |
| MCE-MIR_4239: rev | 41             | 22  |       | 69  | 167   | 104 |       |     |
| mmu-mir-96        | 41             | 27  |       | 108 |       |     |       |     |
| MCE-MIR_4497: rev | 41             | 25  |       | 51  | 715   | 315 |       |     |
| mmu-mir-222       | 41             | 29  | 24    | 143 | 146   | 70  | 58    | 148 |
| MCE-MIR_4726: rev | 41             | 35  |       | 93  | 152   | 91  | 43    | 79  |
| MCE-MIR_463: fwd  | 41             | 37  |       | 116 | 104   | 63  |       | 50  |

| <b>GCNF-/- Time:</b>  | <b>Day 0</b> |            | <b>Day 1</b> |            | <b>Day 3</b> |            | <b>Day 6</b> |            |
|-----------------------|--------------|------------|--------------|------------|--------------|------------|--------------|------------|
| <b>Array Chip ID:</b> | <b>204</b>   | <b>210</b> | <b>124</b>   | <b>217</b> | <b>356</b>   | <b>357</b> | <b>245</b>   | <b>246</b> |
| cand705               | 41           | 47         |              | 84         | 503          | 135        |              | 58         |
| cand149:a             | 40           | 25         |              | 65         | 429          | 246        | 44           | 90         |
| mmu-mir-128a          | 40           | 42         | 24           | 108        | 153          | 114        |              | 228        |
| MCE-MIR_4383:rev      | 40           | 16         |              | 52         | 92           | 72         | 44           |            |
| mmu-mir-125b          | 40           | 80         | 19           | 219        | 763          | 454        | 589          | 672        |
| mmu-let-7f            | 39           | 16         | 73           | 37         | 225          | 231        | 92           | 564        |
| cand415               | 39           | 18         |              |            | 42           | 57         | 126          | 94         |
| mmu-mir-22            | 39           | 81         |              | 209        | 141          | 83         | 91           | 361        |
| MCE-MIR_4034:rev      | 38           | 15         |              | 52         | 115          |            | 29           | 47         |
| cand529               | 38           | 41         |              | 171        | 84           | 39         | 84           | 53         |
| cand619               | 37           | 29         | 27           | 128        | 123          | 84         | 33           | 40         |
| cand210:a             | 37           | 36         | 23           | 87         | 27           | 36         |              |            |
| MCE-MIR_3888:rev      | 35           | 20         |              | 44         | 70           | 65         | 24           | 43         |
| MCE-MIR_1356:fwd      | 35           | 23         |              | 85         | 108          | 77         |              |            |
| MCE-MIR_4745:fwd      | 35           | 38         |              | 39         | 53           | 36         |              | 51         |
| MCE-MIR_3113:fwd      | 35           | 24         |              | 40         |              |            |              |            |
| cand203               | 35           | 41         |              | 90         | 68           | 31         | 29           | 42         |
| cand500:a             | 35           | 31         |              | 103        | 75           | 51         | 42           | 96         |
| MIR4                  | 35           | 20         | 22           | 35         | 33           | 30         |              | 94         |
| mmu-mir-154           | 34           | 32         |              | 80         | 38           | 19         |              |            |
| MCE-MIR_2501:fwd      | 34           |            |              | 54         | 68           | 36         |              |            |
| cand100:b             | 34           |            |              | 25         | 34           | 38         |              |            |
| MCE-MIR_4711:fwd      | 34           | 26         | 16           | 29         | 44           | 35         |              |            |
| mmu-mir-301           | 34           | 28         |              | 300        | 38           | 26         | 55           | 68         |
| MIR121                | 34           | 34         | 25           | 96         | 81           | 46         |              | 163        |
| cand106:b             | 33           | 36         |              | 77         | 47           | 43         | 29           | 40         |
| MCE-MIR_1059:fwd      | 33           | 20         |              | 108        | 76           | 52         |              | 35         |
| cand157               | 33           | 42         | 89           | 44         | 74           | 67         | 91           | 332        |
| MCE-MIR_2894:fwd      | 33           | 13         |              | 50         | 101          | 49         |              | 35         |
| mmu-mir-487b          | 32           | 29         | 22           | 101        | 80           | 53         |              | 44         |
| MCE-MIR_2173:rev      | 32           |            |              | 25         | 149          | 62         |              |            |
| MIR103                | 32           | 26         |              | 103        | 48           | 28         | 51           | 120        |
| mmu-mir-350           | 31           | 21         |              | 152        | 42           | 36         |              |            |
| cand64                | 31           | 22         |              | 144        | 76           | 19         | 253          | 215        |
| mmu-mir-381           | 30           | 22         | 9            | 55         | 47           | 36         |              |            |
| MCE-MIR_2711:rev      | 30           | 17         |              | 41         | 109          | 64         |              | 35         |
| cand664               | 30           | 19         |              | 28         | 77           | 31         |              |            |
| cand91:b              | 30           | 21         |              | 42         | 123          | 44         |              |            |

| <b>GCNF-/- Time:</b>  | <b>Day 0</b> |            | <b>Day 1</b> |            | <b>Day 3</b> |            | <b>Day 6</b> |            |
|-----------------------|--------------|------------|--------------|------------|--------------|------------|--------------|------------|
| <b>Array Chip ID:</b> | <b>204</b>   | <b>210</b> | <b>124</b>   | <b>217</b> | <b>356</b>   | <b>357</b> | <b>245</b>   | <b>246</b> |
| MCE-MIR_2166:rev      | 30           | 17         |              | 49         | 94           | 56         |              |            |
| MCE-MIR_4022:fwd      | 29           | 18         |              | 71         | 87           | 53         |              | 50         |
| MCE-MIR_3886:rev      | 29           | 14         |              |            | 45           | 36         |              |            |
| cand35                | 29           | 20         |              | 20         | 77           | 83         |              |            |
| MCE-MIR_3333:rev      | 29           |            |              | 31         | 100          | 44         |              |            |
| mmu-mir-128b          | 29           | 25         | 15           | 95         | 134          | 96         |              | 165        |
| cand348               | 29           | 19         | 54           |            | 69           | 87         | 30           | 362        |
| cand152:a             | 29           | 23         |              | 85         | 442          | 111        | 95           | 77         |
| MCE-MIR_4738:fwd      | 29           | 15         |              | 52         | 70           | 54         | 25           |            |
| mmu-let-7g            | 29           | 24         | 57           | 36         | 61           | 42         | 57           | 484        |
| cand6                 | 28           | 27         |              | 80         | 83           | 24         | 38           | 79         |
| mmu-mir-485-3p        | 28           | 23         | 10           | 61         | 87           | 25         |              |            |
| mmu-mir-221           | 28           | 22         |              | 154        | 80           | 46         | 61           | 255        |
| mmu-mir-203           | 28           | 21         | 21           | 78         | 60           | 38         | 30           | 133        |
| mmu-mir-300           | 28           | 20         |              | 62         | 39           | 30         |              |            |
| mmu-mir-362           | 28           | 20         |              | 85         | 58           | 52         | 40           |            |
| MCE-MIR_4932:rev      | 27           | 25         |              | 34         |              | 24         |              |            |
| MCE-MIR_3695:fwd      | 27           | 17         | 16           | 39         | 36           | 27         | 17           |            |
| MCE-MIR_2722:rev      | 26           | 15         | 13           | 31         |              |            |              | 38         |
| cand276:b             | 26           | 21         |              | 51         |              | 20         |              |            |
| mmu-let-7i            | 26           | 20         | 27           | 27         | 44           | 29         | 109          | 528        |
| mmu-mir-451           | 25           | 261        |              | 600        |              |            |              | 580        |
| MCE-MIR_4069:rev      | 25           | 14         |              | 44         | 138          | 108        | 56           | 36         |
| MCE-MIR_89:fwd        | 25           | 20         |              | 28         | 63           | 40         | 82           | 108        |
| mmu-mir-485-5p        | 25           | 21         |              | 33         |              | 19         |              |            |
| mmu-mir-323           | 25           | 18         |              | 55         | 36           | 19         |              |            |
| MCE-MIR_4236:rev      | 25           |            |              | 38         | 74           | 34         |              |            |
| MCE-MIR_5167:rev      | 24           |            |              | 50         | 49           | 46         |              |            |
| mmu-mir-486           | 24           | 19         |              | 51         | 92           | 49         |              | 70         |
| MCE-MIR_2364:rev      | 24           | 25         |              | 54         | 94           | 60         |              |            |
| MCE-MIR_4015:fwd      | 24           | 20         |              | 22         | 32           |            | 35           | 63         |
| MCE-MIR_1226:fwd      | 23           |            |              | 25         | 161          | 67         |              |            |
| cand351               | 23           | 18         | 18           | 41         | 122          | 85         | 19           |            |
| mmu-mir-133b          | 23           | 28         |              | 61         | 102          | 55         |              | 120        |
| MCE-MIR_1697:fwd      | 23           |            |              | 54         | 53           | 35         |              |            |
| cand302:a             | 23           | 22         |              | 25         | 69           | 42         |              |            |
| cand120               | 23           | 18         |              | 51         | 199          | 114        |              | 49         |
| cand572:b             | 22           | 19         | 50           | 39         | 85           | 64         | 74           | 103        |

| GCNF/-/ Time:    | Day 0          |     | Day 1 |     | Day 3 |     | Day 6 |     |     |
|------------------|----------------|-----|-------|-----|-------|-----|-------|-----|-----|
|                  | Array Chip ID: | 204 | 210   | 124 | 217   | 356 | 357   | 245 | 246 |
| MIR43            | 22             | 22  |       | 62  |       |     |       |     |     |
| mmu-mir-344      | 22             | 20  |       | 80  | 30    | 27  | 24    | 43  |     |
| mmu-mir-122a     | 22             | 84  |       |     | 20    | 17  |       | 544 |     |
| cand650          | 22             | 19  |       | 39  | 71    | 45  |       |     |     |
| mmu-mir-337      | 21             | 16  |       | 82  |       |     |       | 34  |     |
| MCE-MIR_1482:rev | 21             | 19  |       |     | 29    |     |       |     |     |
| MCE-MIR_2474:rev | 21             | 20  |       | 71  | 85    | 54  |       |     |     |
| MCE-MIR_6001:rev | 21             |     |       |     | 64    | 37  |       |     |     |
| MCE-MIR_1689:rev | 21             | 14  |       | 39  | 41    | 26  |       |     |     |
| mmu-mir-377      | 21             |     | 88    |     |       | 251 | 107   |     |     |
| MCE-MIR_4521:rev | 21             |     |       |     | 25    | 24  |       |     |     |
| mmu-mir-503      | 20             | 17  | 12    | 74  | 127   | 99  | 57    | 50  |     |
| MCE-MIR_5180:rev | 20             |     |       | 32  | 30    |     |       |     |     |
| MCE-MIR_5008:rev | 20             | 18  |       | 43  |       | 32  |       |     |     |
| MCE-MIR_1829:rev | 20             |     |       | 122 | 207   | 85  |       |     |     |
| mmu-mir-470      | 20             | 14  |       | 30  | 89    | 61  |       | 36  |     |
| MCE-MIR_4063:rev | 20             |     |       | 34  | 40    |     | 60    | 47  |     |
| cand184          | 20             | 17  |       | 25  |       | 31  | 17    |     |     |
| MCE-MIR_5033:rev | 19             | 19  |       | 29  | 30    | 25  |       |     |     |
| S-mmu-mir-199a   | 19             | 15  |       | 100 | 51    | 24  | 106   | 469 |     |
| cand213          | 19             | 14  |       | 34  |       |     |       |     |     |
| mmu-mir-30e      | 19             | 15  |       | 69  |       |     |       | 206 |     |
| MCE-MIR_6026:fwd | 19             | 18  | 123   | 44  | 520   | 237 | 209   | 45  |     |
| mmu-mir-299      | 19             | 18  |       | 61  | 35    | 26  |       |     |     |
| cand226          | 19             |     |       | 34  | 181   | 121 |       | 110 |     |
| MCE-MIR_3859:rev | 19             | 15  |       | 48  | 79    | 26  | 23    | 31  |     |
| mmu-mir-133a     | 18             | 31  |       | 45  | 95    | 60  |       | 128 |     |
| MCE-MIR_1546:rev | 18             |     |       | 31  | 32    | 31  |       |     |     |
| cand669          | 18             | 15  |       | 36  | 79    | 59  | 30    |     |     |
| mmu-mir-132      | 18             | 12  |       | 20  | 74    | 28  |       | 60  |     |
| MCE-MIR_4893:fwd | 18             | 19  |       | 36  | 38    |     |       |     |     |
| MCE-MIR_1788:fwd | 18             | 17  |       | 26  | 148   | 77  |       | 28  |     |
| mmu-mir-206      | 18             |     |       |     | 26    | 22  |       | 208 |     |
| mmu-mir-146      | 18             | 15  | 22    | 28  | 42    | 25  |       | 265 |     |
| cand585          | 18             |     |       | 31  | 32    |     |       |     |     |
| MCE-MIR_5970:rev | 18             | 16  | 43    | 29  | 58    | 48  | 34    |     |     |
| mmu-mir-148b     | 18             | 21  |       | 53  | 52    | 25  |       |     |     |
| cand210:b        | 18             | 19  |       |     |       |     |       |     |     |

| GCNF/- Time:      | Day 0          |     | Day 1 |     | Day 3 |     | Day 6 |     |     |
|-------------------|----------------|-----|-------|-----|-------|-----|-------|-----|-----|
|                   | Array Chip ID: | 204 | 210   | 124 | 217   | 356 | 357   | 245 | 246 |
| MCE-MIR_334:rev   | 17             |     |       |     | 50    | 291 | 158   |     |     |
| MCE-MIR_4061:rev  | 17             |     |       |     | 25    | 21  |       | 36  |     |
| mmu-mir-181c      | 17             | 20  |       |     | 76    | 52  | 33    |     |     |
| MCE-MIR_871: fwd  | 17             | 20  |       |     | 21    | 26  |       |     | 64  |
| mmu-mir-452       | 17             | 16  |       |     | 30    | 39  | 33    |     |     |
| MCE-MIR_4491:rev  | 17             | 15  |       |     | 119   | 397 | 424   |     | 46  |
| MCE-MIR_4554:rev  | 17             |     |       |     | 51    | 92  | 56    |     | 34  |
| MCE-MIR_1811:rev  | 16             |     |       |     | 37    | 48  | 28    |     | 33  |
| MCE-MIR_5396:rev  | 16             | 13  | 23    |     | 25    | 33  |       | 66  | 45  |
| MCE-MIR_4809: fwd | 16             |     |       |     |       |     |       |     |     |
| MCE-MIR_1645:rev  | 16             |     |       |     |       | 24  | 18    |     |     |
| MCE-MIR_3057: fwd | 16             |     |       |     |       |     | 38    |     |     |
| mmu-mir-129-3p    | 16             | 20  |       |     | 52    | 65  | 35    |     | 42  |
| mmu-mir-204       | 16             |     |       |     | 29    |     |       |     | 45  |
| MCE-MIR_1433: fwd | 16             |     |       |     | 33    |     |       | 29  | 32  |
| mmu-mir-331       | 15             | 16  |       |     | 70    | 76  | 44    |     |     |
| mmu-mir-410       | 15             |     |       |     | 48    | 37  |       |     |     |
| cand1:a           | 15             |     | 13    |     | 37    |     | 40    |     |     |
| MCE-MIR_4762: fwd | 15             | 16  |       |     |       | 46  | 25    |     | 51  |
| cand70            | 15             |     |       |     | 43    | 132 | 30    |     |     |
| MCE-MIR_4353:rev  | 15             |     |       |     | 27    |     | 18    | 21  |     |
| MCE-MIR_4280: fwd | 15             |     |       |     |       | 32  | 24    |     |     |
| MCE-MIR_407: fwd  | 15             |     |       |     | 22    |     |       |     |     |
| cand137:b         | 15             | 21  |       |     | 20    |     | 35    |     |     |
| cand361           | 15             |     |       |     |       | 39  | 65    | 45  | 58  |
| MIR141            | 14             |     |       |     | 48    | 93  | 70    |     |     |
| mmu-mir-194       | 14             | 15  |       |     | 43    |     |       |     | 162 |
| cand349:a         | 14             | 17  |       |     | 30    | 156 | 118   |     | 52  |
| MCE-MIR_5236:rev  | 14             |     |       |     | 26    |     |       |     |     |
| mmu-mir-218       | 14             |     |       |     | 52    | 36  | 21    | 33  | 119 |
| MCE-MIR_3841: fwd | 14             |     |       |     |       |     | 34    | 20  |     |
| mmu-mir-339       | 14             | 18  |       |     | 32    |     |       |     |     |
| mmu-mir-34c       | 14             | 13  |       |     | 38    |     | 28    |     | 95  |
| cand212           | 14             | 13  |       |     | 45    |     | 21    |     |     |
| mmu-mir-184       | 14             |     |       |     | 24    | 57  | 34    |     |     |
| mmu-mir-193       | 14             |     |       |     | 25    | 38  | 23    |     |     |
| mmu-mir-424       | 13             |     |       |     | 80    | 51  | 33    | 83  | 264 |
| MCE-MIR_3754:rev  | 13             |     |       |     | 28    | 47  | 33    |     |     |

| GCNF/- Time:     | Day 0          |     | Day 1 |     | Day 3 |     | Day 6 |     |     |
|------------------|----------------|-----|-------|-----|-------|-----|-------|-----|-----|
|                  | Array Chip ID: | 204 | 210   | 124 | 217   | 356 | 357   | 245 | 246 |
| MCE-MIR_5322:rev | 13             |     |       |     | 72    | 76  |       |     |     |
| MCE-MIR_293:rev  | 13             |     |       | 23  |       | 24  |       | 36  |     |
| mmu-mir-483      | 13             | 15  |       | 40  | 60    | 31  |       | 33  |     |
| cand135:a        | 13             | 16  |       | 34  |       |     |       | 39  |     |
| mmu-mir-1        | 13             |     |       |     |       |     |       | 436 |     |
| mmu-mir-30a-3p   | 13             |     |       | 50  | 41    | 34  |       | 36  |     |
| cand707          | 13             |     |       |     |       | 19  |       |     |     |
| MCE-MIR_1365:rev | 13             | 12  |       | 36  | 65    | 43  |       |     |     |
| mmu-mir-468      | 13             |     | 18    | 60  | 165   | 78  |       |     |     |
| mmu-mir-378      | 13             |     |       | 20  | 24    | 16  |       |     |     |
| MIR79            | 12             |     | 20    | 35  | 134   | 97  | 153   |     |     |
| MCE-MIR_3522:rev | 12             |     |       |     |       |     |       |     |     |
| mmu-mir-142-5p   | 12             | 16  |       | 21  |       | 16  |       |     |     |
| MCE-MIR_1192:rev | 12             | 14  |       |     | 68    | 51  |       |     |     |
| mmu-mir-212      | 12             | 19  |       | 35  | 95    | 49  |       | 33  |     |
| mmu-mir-29b      | 12             |     |       |     |       |     |       | 228 |     |
| MCE-MIR_5620:fwd | 11             |     |       | 28  | 109   | 88  | 18    |     |     |
| MCE-MIR_1642:rev | 11             |     |       |     | 51    | 54  | 101   |     |     |
| cand375          | 11             | 13  |       | 124 | 209   | 53  | 171   | 279 |     |
| MCE-MIR_1052:rev | 11             |     |       | 27  | 44    | 35  | 21    |     |     |
| MCE-MIR_3084:fwd | 11             |     | 26    | 28  | 197   | 158 |       |     |     |
| mmu-mir-376a     | 11             |     |       | 33  |       |     |       |     |     |
| cand262          | 11             |     |       |     | 30    |     | 15    | 90  |     |
| cand40           | 11             |     |       |     |       |     |       | 43  |     |
| MCE-MIR_3007:rev | 10             |     |       |     |       |     |       |     |     |
| mmu-mir-199a     | 10             | 13  |       | 50  |       |     |       | 134 |     |
| MCE-MIR_3429:fwd | 10             |     |       | 26  | 385   | 211 |       |     |     |
| mmu-mir-383      | 10             |     |       | 24  | 68    | 38  |       |     |     |
| mmu-mir-411      | 10             |     |       | 23  | 102   | 44  |       |     |     |
| MCE-MIR_2339:fwd | 10             |     |       |     |       | 29  |       | 57  |     |
| mmu-mir-434-5p   | 10             | 18  |       | 27  |       |     |       |     |     |
| cand564:a        | 10             |     |       | 27  |       |     |       |     |     |
| MCE-MIR_3667:rev | 10             |     |       | 18  | 69    | 43  | 16    |     |     |
| mmu-mir-380-3p   | 10             |     |       | 26  |       |     |       |     |     |
| mmu-mir-100      | 10             |     |       | 75  | 39    | 26  | 28    | 119 |     |
| MCE-MIR_4280:rev | 9              |     |       |     | 32    | 23  |       |     |     |
| S-mmu-mir-9      | 9              |     |       | 39  |       |     | 37    | 150 |     |
| mmu-mir-99a      | 9              |     |       | 26  | 34    |     | 89    | 267 |     |





| GCNF/- Time:     | Day 0 |     | Day 1 |     | Day 3 |     | Day 6 |     |
|------------------|-------|-----|-------|-----|-------|-----|-------|-----|
|                  | 204   | 210 | 124   | 217 | 356   | 357 | 245   | 246 |
| cand352:a        |       |     |       |     |       |     |       |     |
| cand352:b        |       |     |       |     |       |     |       |     |
| cand427          |       |     |       |     | 123   | 55  |       |     |
| cand492          |       |     |       |     | 1,772 | 745 |       |     |
| cand497:b        |       |     |       |     |       |     |       | 59  |
| cand50           |       |     |       |     |       |     |       |     |
| cand500:b        |       | 14  |       | 22  | 42    | 27  |       |     |
| cand524          |       |     |       |     |       | 16  |       |     |
| cand549          |       |     |       |     |       |     |       |     |
| cand590          |       |     |       |     |       |     |       |     |
| cand7            |       |     |       | 49  | 540   | 441 |       |     |
| cand708:a        |       |     |       |     |       | 19  |       |     |
| cand82           |       |     |       |     |       |     |       |     |
| MCE-MIR_1259:rev |       |     |       |     |       |     |       |     |
| MCE-MIR_1264:rev |       |     |       |     |       | 34  |       |     |
| MCE-MIR_1269:rev |       |     |       |     | 22    | 15  |       |     |
| MCE-MIR_1311:rev |       |     |       |     | 44    | 33  |       |     |
| MCE-MIR_1356:rev |       |     |       |     |       | 33  |       |     |
| MCE-MIR_1401:fwd |       |     |       |     |       |     |       |     |
| MCE-MIR_1412:fwd |       | 12  |       | 25  | 22    |     |       |     |
| MCE-MIR_1433:rev |       |     |       | 21  |       |     |       |     |
| MCE-MIR_1442:fwd |       |     |       |     |       |     |       |     |
| MCE-MIR_151:fwd  |       |     |       | 28  | 44    | 24  |       | 41  |
| MCE-MIR_1679:fwd |       |     |       | 20  |       |     |       |     |
| MCE-MIR_1710:rev |       |     |       |     |       |     |       |     |
| MCE-MIR_1786:fwd |       |     |       |     |       |     |       |     |
| MCE-MIR_188:fwd  |       |     |       |     |       |     |       |     |
| MCE-MIR_1905:rev |       |     |       |     | 41    | 32  |       |     |
| MCE-MIR_1929:fwd |       |     |       |     |       |     |       |     |
| MCE-MIR_1998:fwd |       |     |       | 15  |       |     |       |     |
| MCE-MIR_2087:rev |       |     |       |     |       |     |       |     |
| MCE-MIR_2166:fwd |       |     |       |     |       |     |       | 42  |
| MCE-MIR_2197:fwd |       |     |       |     |       |     |       |     |
| MCE-MIR_2198:fwd |       |     |       |     |       |     |       |     |
| MCE-MIR_2205:fwd |       |     |       |     |       |     |       |     |
| MCE-MIR_2288:fwd |       |     |       |     | 32    |     |       | 46  |
| MCE-MIR_2339:rev |       |     |       |     |       |     |       |     |
| MCE-MIR_2371:fwd |       |     |       |     | 44    |     |       |     |



| <b>GCNF-/- Time:</b>  | <b>Day 0</b> |            | <b>Day 1</b> |            | <b>Day 3</b> |            | <b>Day 6</b> |            |
|-----------------------|--------------|------------|--------------|------------|--------------|------------|--------------|------------|
| <b>Array Chip ID:</b> | <b>204</b>   | <b>210</b> | <b>124</b>   | <b>217</b> | <b>356</b>   | <b>357</b> | <b>245</b>   | <b>246</b> |
| MCE-MIR_4607:fwd      |              |            |              |            |              |            |              |            |
| MCE-MIR_4614:rev      |              |            |              |            | 39           | 23         |              | 46         |
| MCE-MIR_466:fwd       |              |            |              |            |              |            |              |            |
| MCE-MIR_4667:fwd      |              |            |              |            | 28           |            |              |            |
| MCE-MIR_4789:rev      |              |            |              |            |              |            |              |            |
| MCE-MIR_4799:rev      |              |            |              |            |              | 27         |              |            |
| MCE-MIR_482:fwd       |              |            |              |            |              |            |              |            |
| MCE-MIR_482:rev       |              |            |              |            |              |            |              |            |
| MCE-MIR_4830:fwd      |              |            |              |            |              |            | 19           |            |
| MCE-MIR_4832:rev      |              |            |              |            |              |            |              |            |
| MCE-MIR_4853:fwd      |              |            |              |            |              | 21         |              |            |
| MCE-MIR_4893:rev      |              |            |              |            |              |            |              |            |
| MCE-MIR_4972:fwd      |              |            |              |            |              |            |              |            |
| MCE-MIR_4978:rev      |              |            |              |            |              |            |              |            |
| MCE-MIR_504:fwd       |              |            |              |            |              |            |              |            |
| MCE-MIR_5046:rev      |              |            |              |            |              |            |              |            |
| MCE-MIR_5105:rev      |              |            |              | 41         | 96           | 60         |              |            |
| MCE-MIR_5122:rev      |              |            |              | 32         | 55           | 40         |              |            |
| MCE-MIR_5167:fwd      |              |            |              |            |              |            |              |            |
| MCE-MIR_5180:fwd      |              |            |              |            |              |            |              |            |
| MCE-MIR_5260:fwd      |              |            |              |            |              |            |              |            |
| MCE-MIR_5279:fwd      |              |            |              |            |              |            |              |            |
| MCE-MIR_5287:rev      |              |            |              |            |              |            | 18           |            |
| MCE-MIR_5300:rev      |              |            |              |            |              |            |              |            |
| MCE-MIR_5303:fwd      |              |            |              | 27         | 269          | 139        | 259          | 380        |
| MCE-MIR_5374:rev      |              |            |              |            |              |            |              |            |
| MCE-MIR_5504:rev      |              |            |              |            |              |            |              |            |
| MCE-MIR_5581:fwd      |              |            |              |            |              |            | 22           |            |
| MCE-MIR_5581:rev      |              |            |              |            |              |            | 17           | 38         |
| MCE-MIR_5598:fwd      |              |            |              |            |              |            |              |            |
| MCE-MIR_5623:rev      |              |            |              |            |              |            |              |            |
| MCE-MIR_5704:rev      |              |            |              |            |              |            |              | 58         |
| MCE-MIR_5864:fwd      |              |            |              |            |              |            |              |            |
| MCE-MIR_6033:fwd      |              |            |              | 23         | 52           | 21         |              |            |
| MCE-MIR_6034:rev      |              |            |              | 42         | 243          | 98         |              |            |
| MCE-MIR_6120:fwd      |              |            |              |            |              |            | 13           |            |
| MCE-MIR_689:rev       |              |            |              |            |              |            |              |            |
| MCE-MIR_774:rev       |              |            |              |            | 30           | 22         |              |            |





| GCNF/- Time:     | Day 0 |     | Day 1 |       | Day 3 |     | Day 6 |     |
|------------------|-------|-----|-------|-------|-------|-----|-------|-----|
| Array Chip ID:   | 204   | 210 | 124   | 217   | 356   | 357 | 245   | 246 |
| mmu-mir-471      |       |     |       |       |       |     |       |     |
| mmu-mir-489      |       |     |       | 23    | 24    |     |       |     |
| mmu-mir-539      |       |     |       | 29    | 26    |     |       |     |
| mmu-mir-542-3p   |       |     |       |       |       |     |       |     |
| mmu-mir-542-5p   |       |     |       |       | 51    | 32  |       |     |
| mmu-mir-547      |       |     |       |       |       |     |       |     |
| mmu-mir-7b       |       |     |       |       |       |     |       |     |
| S-mmu-let-7a-1   |       | 13  |       | 26    | 19    |     |       | 37  |
| S-mmu-let-7a-2   |       | 13  |       | 32    | 303   | 30  |       | 36  |
| S-mmu-let-7b     |       | 21  |       |       | 130   | 22  |       | 62  |
| S-mmu-let-7c-1   |       |     |       |       |       |     |       |     |
| S-mmu-let-7c-2   |       |     |       |       |       |     |       |     |
| S-mmu-let-7e     |       |     |       |       | 113   | 60  |       | 37  |
| S-mmu-let-7f-1   |       | 18  |       |       |       |     |       |     |
| S-mmu-let-7f-2   |       |     |       |       |       |     |       |     |
| S-mmu-let-7g     |       | 23  |       | 46    |       |     |       | 46  |
| S-mmu-let-7i     |       | 20  |       | 27    |       |     |       | 65  |
| S-mmu-mir-100    |       |     |       |       |       |     |       |     |
| S-mmu-mir-101a   |       |     |       |       |       |     |       |     |
| S-mmu-mir-101b   |       |     |       |       |       |     |       |     |
| S-mmu-mir-103-1  |       | 30  |       | 57    |       | 34  |       | 71  |
| S-mmu-mir-103-2  |       |     |       | 17    |       | 18  |       | 39  |
| S-mmu-mir-106a   |       | 21  |       | 35    | 22    | 26  |       |     |
| S-mmu-mir-106b   |       | 412 |       | 1,122 | 481   | 351 | 252   | 189 |
| S-mmu-mir-107    |       | 23  |       | 24    |       |     |       | 48  |
| S-mmu-mir-10a    |       | 16  |       | 58    | 58    | 32  | 19    | 53  |
| S-mmu-mir-10b    |       | 26  |       | 139   | 52    |     | 57    | 64  |
| S-mmu-mir-1-1    |       | 94  |       | 121   | 37    |     | 33    | 81  |
| S-mmu-mir-1-2    |       | 14  |       |       |       |     |       | 52  |
| S-mmu-mir-122a   |       |     |       |       |       |     |       | 57  |
| S-mmu-mir-124a-1 |       | 31  |       | 36    | 18    | 45  | 15    |     |
| S-mmu-mir-124a-2 |       | 32  |       | 32    |       | 37  |       | 56  |
| S-mmu-mir-124a-3 |       | 32  |       | 40    | 17    | 40  |       | 55  |
| S-mmu-mir-125a   |       | 39  |       | 129   | 158   | 119 | 55    | 77  |
| S-mmu-mir-125b-1 |       | 30  |       | 63    | 231   | 141 |       | 57  |
| S-mmu-mir-125b-2 |       | 13  |       |       |       |     |       | 60  |
| S-mmu-mir-127    |       | 21  |       | 36    | 43    | 35  |       | 70  |
| S-mmu-mir-128a   |       |     |       |       | 94    | 69  |       | 38  |

| GCNF/- Time:     | Day 0 |        | Day 1 |        | Day 3  |        | Day 6  |        |
|------------------|-------|--------|-------|--------|--------|--------|--------|--------|
|                  | 204   | 210    | 124   | 217    | 356    | 357    | 245    | 246    |
| S-mmu-mir-128b   |       | 987    |       | 659    | 11,124 | 6,169  | 22     | 54     |
| S-mmu-mir-129-1  |       | 21     |       | 33     | 61     | 42     | 11     | 80     |
| S-mmu-mir-130a   |       |        |       |        |        |        |        |        |
| S-mmu-mir-132    |       |        |       |        |        |        |        | 46     |
| S-mmu-mir-133a-1 |       |        |       |        |        |        |        | 58     |
| S-mmu-mir-133a-2 |       |        |       |        |        |        |        | 64     |
| S-mmu-mir-133b   |       | 466    |       | 732    | 1,398  |        |        | 1,208  |
| S-mmu-mir-134    |       | 22     |       | 19     |        | 20     |        | 50     |
| S-mmu-mir-135a-1 |       | 24     |       |        |        | 34     |        | 40     |
| S-mmu-mir-135a-2 |       | 29     |       |        | 58     | 59     |        | 50     |
| S-mmu-mir-137    |       | 13     |       |        |        |        |        | 31     |
| S-mmu-mir-138-1  |       |        |       |        |        | 28     |        | 44     |
| S-mmu-mir-138-2  |       | 20     |       |        | 34     | 50     |        | 47     |
| S-mmu-mir-139    |       | 19     |       |        | 42     | 34     |        | 34     |
| S-mmu-mir-141    |       | 12     |       |        |        |        |        | 54     |
| S-mmu-mir-143    |       | 16     |       |        |        |        |        | 53     |
| S-mmu-mir-144    |       |        |       |        |        |        |        | 51     |
| S-mmu-mir-145    |       | 15     |       |        |        |        |        | 71     |
| S-mmu-mir-146    |       |        |       |        |        |        |        | 42     |
| S-mmu-mir-148a   |       | 14     |       |        |        |        |        | 49     |
| S-mmu-mir-148b   |       |        |       |        |        |        |        | 52     |
| S-mmu-mir-149    |       | 32,484 |       | 31,725 | 48,968 | 27,731 | 26,802 | 82,672 |
| S-mmu-mir-150    |       | 6,648  |       | 8,323  | 9,595  | 3,195  | 4,733  | 5,961  |
| S-mmu-mir-151    |       | 466    |       | 1,045  | 677    | 468    | 265    | 283    |
| S-mmu-mir-154    |       |        |       |        |        |        |        | 60     |
| S-mmu-mir-15a    |       | 30     |       | 51     | 35     | 35     | 26     | 111    |
| S-mmu-mir-15b    |       |        |       |        |        |        |        | 65     |
| S-mmu-mir-16-1   |       | 34     |       | 27     | 55     | 49     |        | 76     |
| S-mmu-mir-16-2   |       |        |       |        |        |        |        | 62     |
| S-mmu-mir-18     |       | 49     |       | 43     | 40     | 48     |        | 78     |
| S-mmu-mir-181a   |       |        |       | 19     | 53     | 35     | 19     | 43     |
| S-mmu-mir-181c   |       | 19     |       | 38     | 18     | 17     |        |        |
| S-mmu-mir-182    |       |        |       |        |        |        |        | 32     |
| S-mmu-mir-183    |       | 172    |       | 432    | 313    | 176    | 37     | 38     |
| S-mmu-mir-184    |       | 54     |       | 80     | 55     | 46     | 30     | 73     |
| S-mmu-mir-185    |       |        |       | 19     | 45     | 42     |        |        |
| S-mmu-mir-186    |       |        |       |        |        |        |        |        |
| S-mmu-mir-187    |       | 44     |       | 142    | 95     | 78     |        |        |



| <b>GCNF/- Time:</b>   | <b>Day 0</b> |            | <b>Day 1</b> |            | <b>Day 3</b> |            | <b>Day 6</b> |            |
|-----------------------|--------------|------------|--------------|------------|--------------|------------|--------------|------------|
| <b>Array Chip ID:</b> | <b>204</b>   | <b>210</b> | <b>124</b>   | <b>217</b> | <b>356</b>   | <b>357</b> | <b>245</b>   | <b>246</b> |
| S-mmu-mir-188         |              | 17         |              | 36         | 77           | 45         |              | 47         |
| S-mmu-mir-190         |              |            |              |            |              |            |              | 30         |
| S-mmu-mir-191         |              |            |              |            |              |            |              |            |
| S-mmu-mir-192         |              |            |              |            |              |            |              |            |
| S-mmu-mir-193         |              | 32         |              | 67         | 147          | 110        |              | 36         |
| S-mmu-mir-194-1       |              |            |              |            | 29           | 27         |              | 30         |
| S-mmu-mir-194-2       |              | 60         |              | 144        | 502          | 400        |              | 31         |
| S-mmu-mir-195         |              |            |              | 18         |              |            |              | 34         |
| S-mmu-mir-196a-1      |              | 12         |              |            |              |            |              | 35         |
| S-mmu-mir-196a-2      |              |            |              | 31         |              |            |              | 47         |
| S-mmu-mir-196b        |              | 46         |              | 88         | 89           | 80         |              | 82         |
| S-mmu-mir-199b        |              | 32         |              | 146        |              | 37         | 214          | 663        |
| S-mmu-mir-20          |              |            |              |            | 15           |            |              | 41         |
| S-mmu-mir-200a        |              | 33         |              | 59         | 75           | 49         |              | 42         |
| S-mmu-mir-200b        |              | 51         |              | 137        | 133          | 76         |              | 38         |
| S-mmu-mir-204         |              | 953        |              | 1,968      | 8,145        | 2,750      | 161          | 212        |
| S-mmu-mir-207         |              | 21,778     |              | 38,057     | 41,075       | 23,346     | 18,995       | 38,435     |
| S-mmu-mir-208         |              | 104        |              | 242        | 408          | 128        |              | 48         |
| S-mmu-mir-21          |              | 3,162      |              | 9,940      | 10,083       | 3,016      | 3,553        | 4,791      |
| S-mmu-mir-210         |              | 119        |              | 299        | 750          | 353        | 90           | 174        |
| S-mmu-mir-211         |              | 5,319      |              | 12,359     | 17,017       | 10,173     | 11,819       | 16,519     |
| S-mmu-mir-212         |              |            |              |            | 390          |            |              | 48         |
| S-mmu-mir-214         |              |            |              |            |              |            |              | 46         |
| S-mmu-mir-218-1       |              | 32         |              | 28         | 81           | 69         | 17           | 61         |
| S-mmu-mir-218-2       |              | 41         |              | 52         | 93           | 82         |              | 64         |
| S-mmu-mir-219-2       |              | 21         |              | 180        | 93           | 53         |              | 53         |
| S-mmu-mir-22          |              | 14         |              | 38         | 47           | 40         |              | 82         |
| S-mmu-mir-221         |              |            |              |            |              |            |              | 35         |
| S-mmu-mir-223         |              |            |              |            |              |            |              |            |
| S-mmu-mir-23a         |              | 251        |              | 631        | 1,218        | 687        | 64           | 76         |
| S-mmu-mir-23b         |              | 51         |              | 59         | 42           | 43         |              |            |
| S-mmu-mir-24-2        |              | 88         |              | 315        | 63           | 53         | 27           | 73         |
| S-mmu-mir-25          |              | 290        |              | 340        | 510          | 336        |              | 31         |
| S-mmu-mir-26a-1       |              |            |              |            |              |            |              | 28         |
| S-mmu-mir-27a         |              | 36         |              | 120        | 46           | 39         |              |            |
| S-mmu-mir-27b         |              | 26         |              | 33         |              | 30         |              | 29         |
| S-mmu-mir-28          |              | 69         |              | 200        | 210          | 143        | 62           | 110        |
| S-mmu-mir-290         |              | 108        |              | 178        | 411          | 174        |              |            |



| <b>GCNF/- Time:</b>   | <b>Day 0</b> |            | <b>Day 1</b> |            | <b>Day 3</b> |            | <b>Day 6</b> |            |
|-----------------------|--------------|------------|--------------|------------|--------------|------------|--------------|------------|
| <b>Array Chip ID:</b> | <b>204</b>   | <b>210</b> | <b>124</b>   | <b>217</b> | <b>356</b>   | <b>357</b> | <b>245</b>   | <b>246</b> |
| S-mmu-mir-377         |              | 17         |              |            | 21           |            |              | 28         |
| S-mmu-mir-378         |              | 358        |              | 404        | 115          | 54         | 102          | 384        |
| S-mmu-mir-379         |              | 17         |              | 42         | 33           |            |              | 47         |
| S-mmu-mir-381         |              | 14         |              |            |              | 17         |              | 30         |
| S-mmu-mir-382         |              |            |              |            |              |            |              | 52         |
| S-mmu-mir-384         |              |            |              |            |              |            | 109          | 43         |
| S-mmu-mir-409         |              |            |              |            |              | 24         |              |            |
| S-mmu-mir-412         |              |            |              | 32         | 69           | 36         |              | 46         |
| S-mmu-mir-425         |              | 164        |              | 413        | 238          | 113        | 39           | 129        |
| S-mmu-mir-431         |              | 67         |              | 380        | 227          | 101        | 50           | 91         |
| S-mmu-mir-448         |              |            |              |            |              |            |              | 29         |
| S-mmu-mir-449         |              |            |              |            | 37           | 42         |              | 37         |
| S-mmu-mir-451         |              |            |              |            |              |            |              |            |
| S-mmu-mir-465         |              |            |              | 16         | 43           | 26         |              | 67         |
| S-mmu-mir-466         |              |            |              | 15         | 45           | 24         |              |            |
| S-mmu-mir-467         |              | 968        |              | 3,390      | 3,789        | 1,989      | 174          | 152        |
| S-mmu-mir-468         |              |            |              |            |              |            |              | 46         |
| S-mmu-mir-469         |              | 30,043     |              | 38,060     | 36,801       | 19,989     | 26,652       | 73,971     |
| S-mmu-mir-471         |              |            |              |            |              |            |              | 33         |
| S-mmu-mir-483         |              | 582        |              | 1,145      | 2,665        | 826        | 1,194        | 1,045      |
| S-mmu-mir-484         |              | 10,130     |              | 17,921     | 15,896       | 7,407      | 18,893       | 31,280     |
| S-mmu-mir-486         |              | 46         |              | 28         | 228          | 144        |              | 46         |
| S-mmu-mir-7-1         |              | 18         |              | 40         |              |            |              | 92         |
| S-mmu-mir-7-2         |              | 65         |              | 110        | 94           | 65         | 30           | 106        |
| S-mmu-mir-7b          |              | 99         |              | 133        | 174          | 81         | 68           | 150        |
| S-mmu-mir-92-1        |              |            |              | 15         | 35           | 32         |              | 41         |
| S-mmu-mir-92-2        |              | 368        |              | 576        | 6,135        | 3,652      | 25           | 60         |
| S-mmu-mir-93          |              | 80         |              | 117        | 72           | 39         | 35           | 79         |
| S-mmu-mir-96          |              |            |              |            |              |            |              | 41         |
| S-mmu-mir-98          |              |            |              |            |              |            |              | 49         |
| S-mmu-mir-99a         |              |            |              |            |              | 13         |              | 44         |
| S-mmu-mir-99b         |              | 47         |              | 172        | 113          | 78         | 60           | 108        |
